# Supplementary material for: Deep evolutionary origin of gamete-directed zygote activation by KNOX/BELL transcription factors in green plants
Source: eLife. 2021 Sep 28;10:e57090. doi: 10.7554/eLife.57090 (PMC8478417; doi:10.7554/eLife.57090)
Supplement: Supplementary file 1. — Genes with reduced and increased expression levels in Mprkd archegonia are listed in sheet 1 and sheet 2, respectively. [file elife-57090-supp1.xlsx]

## Sheet: Sheet1
Supplementary File 1. List of genes with changed mRNA levels in Mprkd archegonia
Sheet 1: Genes with reduced mRNA levels in Mprkd archegonia
Gene ID	WT_rep1	WT_rep2	WT_rep3	WT_rep4	WT_average	WT_FPKM	Mprkd-1_rep1	Mprkd-1_rep2	Mprkd-3_rep1	Mprkd-3_rep2	Mprkd_average	Mprkd-1_FPKM	Mprkd-3_FPKM	LOG2FC	a.value	m.value	p.value	q.value	Short_description
Mapoly0122s0030	1587	2882	1989	2007	2116.25	98.5357	0	0	0	0	0	0	0	-26.8808	-15.2261	-27.3583	8.83996e-131	1.70496e-126	[PF13837] Myb/SANT-like DNA-binding domain
Mapoly0084s0047	1626	2469	1679	1792	1891.5	59.614	6	6	15	6	8.25	0.16258	0.279075	-7.84092	6.97633	-8.13876	5.2785e-119	5.09033e-115	[PTHR11125] SUPPRESSOR OF TY 5
Mapoly0088s0051	1844	4072	2877	3391	3046	105.412	0	0	0	0	0	0	0	-27.4062	-15.2261	-27.8992	5.63194e-117	3.62077e-113	[GO:0042393] histone binding; [PF02182] SAD/SRA domain; [PTHR22884:SF96] HYPOTHETICAL PROTEIN CBG15515; [PTHR22884] SET DOMAIN PROTEINS
Mapoly0020s0154	1561	3378	2230	2872	2510.25	82.3906	0	0	1	0	0.25	0	0.012175	-13.2935	4.58501	-13.7843	2.14921e-113	1.0363e-109
Mapoly0096s0041	941	1566	1131	1258	1224	73.57	1	1	0	0	0.5	0.0513052	0	-11.2573	4.65168	-11.553	4.26055e-107	1.64346e-103
Mapoly0026s0024	1581	3571	2394	3023	2642.25	169.749	4	1	2	0	1.75	0.122319	0.0474273	-10.5602	6.03929	-11.0282	3.75454e-104	1.2069e-100
Mapoly0053s0048	1564	4028	2550	3291	2858.25	66.0119	0	0	0	0	0	0	0	-27.3144	-15.2261	-27.8108	1.08577e-102	2.99161e-99	[PF03470] XS zinc finger domain; [PTHR21596] RIBONUCLEASE P PROTEIN SUBUNIT P38-RELATED; [PF03469] XH domain; [PF03468] XS domain; [GO:0031047] gene silencing by RNA; [PTHR21596:SF3] TRANSCRIPTION FACTOR X1-LIKE
Mapoly0012s0033	848	809	663	770	772.5	46.7525	0	1	1	0	0.5	0.030628	0.0229994	-10.5933	4.32144	-10.8307	7.24884e-97	1.7476e-93
Mapoly0183s0002	1555	2846	1755	1767	1980.75	114.56	15	14	4	8	10.25	0.704903	0.329504	-7.59428	7.19775	-7.83628	5.60648e-94	1.20147e-90	[PTHR24322] FAMILY NOT NAMED; [KOG0725] Reductases with broad range of substrate specificities; [GO:0016491] oxidoreductase activity; [GO:0008152] metabolic process; [PF00106] short chain dehydrogenase
Mapoly0003s0229	3116	10167	6599	8748	7157.5	218.688	2	1	5	1	2.25	0.0371151	0.0718958	-11.6353	6.98356	-12.0441	3.26278e-91	6.29292e-88	[KOG4282] Transcription factor GT-2 and related proteins, contains trihelix DNA-binding/SANT domain
Mapoly0011s0043	904	983	553	626	766.5	29.7123	0	0	0	0	0	0	0	-25.4157	-15.2261	-25.8493	8.72964e-89	1.53062e-85	[GO:0005524] ATP binding; [GO:0003774] motor activity; [K13303] serum/glucocorticoid-regulated kinase 2 [EC:2.7.11.1]; [PF06017] Myosin tail; [PF00069] Protein kinase domain; [GO:0004672] protein kinase activity; [PF00433] Protein kinase C terminal domain; [2.7.11.1] Non-specific serine/threonine protein kinase.; [GO:0006468] protein phosphorylation; [KOG0598] Ribosomal protein S6 kinase and rela…
Mapoly0175s0020	1330	909	553	730	880.5	19.5087	2	4	0	1	1.75	0.0628643	0.012399	-8.97481	5.33831	-9.08457	3.63652e-86	5.84479e-83	[GO:0003677] DNA binding; [PTHR11850] HOMEOBOX PROTEIN TRANSCRIPTION FACTORS; [GO:0006355] regulation of transcription, DNA-dependent; [PF05920] Homeobox KN domain
Mapoly0053s0051	1698	4556	4469	4341	3766	301.568	2	4	2	0	2	0.211001	0.0582878	-10.8788	6.48819	-11.1949	1.51279e-85	2.2444e-82
Mapoly0081s0010	676	1102	787	823	847	36.397	0	2	0	1	0.75	0.0428024	0.0229487	-10.1412	4.80281	-10.1811	1.64984e-85	2.27289e-82	[PTHR32133] FAMILY NOT NAMED; [GO:0005515] protein binding; [PF00646] F-box domain
Mapoly0041s0122	1078	1567	1195	1250	1272.5	82.0246	29	20	27	23	24.75	1.323	1.44499	-5.68409	7.49883	-5.95784	4.32195e-85	5.55716e-82
Mapoly0106s0038	789	2071	1556	1848	1566	90.6554	2	0	0	0	0.5	0.0408852	0	-11.6128	4.71498	-12.1895	1.0098e-83	1.21725e-80	[PF14570] RING/Ubox like zinc-binding domain; [PTHR12603:SF1] CCR4-NOT TRANSCRIPTION COMPLEX RELATED; [PTHR12603] CCR4-NOT TRANSCRIPTION COMPLEX RELATED
Mapoly0093s0028	2537	3521	2516	3000	2893.5	38.7549	78	95	96	81	87.5	0.908543	0.981993	-5.04739	9.01645	-5.28671	1.39889e-82	1.58708e-79	[GO:0003677] DNA binding; [PTHR11850] HOMEOBOX PROTEIN TRANSCRIPTION FACTORS; [GO:0006355] regulation of transcription, DNA-dependent; [PF05920] Homeobox KN domain
Mapoly0013s0128	1094	1715	1455	1482	1436.5	98.7474	41	29	35	31	34	1.99071	2.02721	-5.40088	7.82138	-5.68339	1.92579e-79	2.06349e-76
Mapoly0142s0038	644	1782	1606	1375	1351.75	177.129	0	0	0	0	0	0	0	-26.2341	-15.2261	-26.7423	9.59523e-78	9.74017e-75
Mapoly0010s0042	657	680	509	536	595.5	22.5418	1	0	1	0	0.5	0.0137973	0.014423	-10.2179	4.00741	-10.7008	4.80663e-77	4.63528e-74	[PF00385] Chromo (CHRromatin Organisation MOdifier) domain
Mapoly0004s0010	680	767	502	496	611.25	42.9544	0	2	0	1	0.75	0.0729266	0.0390987	-9.67062	4.55151	-9.67851	1.8045e-73	1.6573e-70	[PF03468] XS domain; [GO:0031047] gene silencing by RNA
Mapoly0088s0084	603	1085	1008	884	895	78.8809	7	4	5	4	5	0.391847	0.349114	-7.48381	6.09034	-7.79862	6.582e-72	5.77032e-69
Mapoly0001s0254	893	2391	1889	2284	1864.25	83.2478	8	8	9	10	8.75	0.297538	0.400741	-7.73509	7.06346	-8.00323	3.47773e-70	2.9163e-67
Mapoly0045s0026	1040	4508	3602	3636	3196.5	218.859	0	1	0	1	0.5	0.0330451	0.0354345	-12.6422	5.50002	-12.7106	2.91731e-69	2.34442e-66	[PTHR12663:SF0] SUBFAMILY NOT NAMED; [PTHR12663] ANDROGEN INDUCED INHIBITOR OF PROLIFERATION (AS3) / PDS5-RELATED
Mapoly0025s0041	524	1229	986	1045	946	23.5006	1	3	1	0	1.25	0.0451977	0.00912775	-9.56375	5.16686	-9.82338	7.33672e-69	5.66013e-66
Mapoly0012s0152	609	614	437	457	529.25	23.4024	2	0	2	0	1	0.0323624	0.0338299	-9.04778	4.41946	-9.52492	9.71436e-69	7.20619e-66	[PTHR31960] FAMILY NOT NAMED; [PF14299] Phloem protein 2
Mapoly0031s0175	1074.44	3262.33	2158.13	2700.54	2298.86	51.5216	4.0452	8.8773	5.01793	9	6.73511	0.1288	0.146679	-8.415	7.05766	-8.61268	4.72494e-67	3.37518e-64
Mapoly0008s0215	460	1449	1138	1168	1053.75	29.427	0	0	0	1	0.25	0	0.0145553	-12.0412	4.21987	-12.0482	4.24959e-64	2.92721e-61
Mapoly0068s0090	410	667	560	595	558	81.7853	1	0	0	0	0.25	0.0520659	0	-11.124	3.46084	-11.6813	2.60067e-63	1.72963e-60
Mapoly0006s0138	747	889	780	892	827	20.7679	28	17	27	9	20.25	0.465272	0.37516	-5.35189	7.01016	-5.68981	2.83093e-62	1.82e-59	[PTHR15856] PHD FINGER PROTEIN 20-RELATED; [KOG1844] PHD Zn-finger proteins
Mapoly0060s0037	692	1125	726	943	871.5	14.577	27	17	24	15	20.75	0.303077	0.284018	-5.39232	7.08597	-5.6972	8.5194e-61	5.30044e-58
Mapoly0005s0270	1009	2448	2051	2504	2003	48.0526	17	26	18	21	20.5	0.449133	0.42853	-6.61039	7.73931	-6.85744	4.90918e-60	2.88079e-57	[PTHR10588:SF32] LEUCINE-RICH REPEAT-CONTAINING PROTEIN 48; [PTHR10588] FAMILY NOT NAMED; [KOG1644] U2-associated snRNP A' protein; [PF14580] Leucine-rich repeat
Mapoly0112s0003	540	651	533	478	550.5	63.7142	2	3	1	5	2.75	0.25842	0.356026	-7.64516	5.37553	-7.76246	4.92903e-60	2.88079e-57
Mapoly0016s0094	442	628	475	490	508.75	58.5218	0	3	0	0	0.75	0.172479	0	-9.40582	4.41476	-9.47598	7.57789e-59	4.29867e-56
Mapoly0015s0067	523	1850	1384	1697	1363.5	91.6235	2	4	2	0	2	0.176865	0.0488578	-9.41309	5.75594	-9.73044	1.38032e-58	7.60636e-56
Mapoly0064s0014	1089	1530	1186	1240	1261.25	36.6905	40	34	79	24	44.25	0.911324	1.23563	-4.83303	7.88524	-5.15717	4.92444e-58	2.58389e-55
Mapoly0173s0030	382	698	519	655	563.5	31.1677	1	1	0	1	0.75	0.0468628	0.0292439	-9.55328	4.44733	-9.74444	4.95691e-58	2.58389e-55	[PTHR31301] FAMILY NOT NAMED; [PF03195] Protein of unknown function DUF260
Mapoly0049s0049	2167	6081	4853	5162	4565.75	459.028	53	45	39	63	50	4.06665	4.74067	-6.51278	8.97218	-6.76892	2.76693e-57	1.40436e-54	[PF02825] WWE domain
Mapoly0111s0028	925	1142	745	904	929	9.18553	18	37	27	20	25.5	0.249065	0.208115	-5.18711	7.31109	-5.39293	9.45108e-57	4.67392e-54	[PF13589] Histidine kinase-, DNA gyrase B-, and HSP90-like ATPase
Mapoly0157s0012	792	2769	1951	2031	1885.75	108.868	7	13	11	12	10.75	0.506417	0.59348	-7.45466	7.23498	-7.69436	1.20623e-56	5.81615e-54
Mapoly0082s0090	331	773	727	636	616.75	27.6242	1	0	0	0	0.25	0.0157041	0	-11.2684	3.54282	-11.8452	4.19317e-56	1.97253e-53
Mapoly0049s0048	3094	7409	5631	6291	5606.25	340.517	43	72	44	75	58.5	3.05915	3.37356	-6.58246	9.2491	-6.7917	3.19346e-55	1.46648e-52	[PF02825] WWE domain
Mapoly0016s0187	375	907	719	781	695.5	39.0394	1	3	3	1	2	0.102032	0.091241	-8.44189	5.2749	-8.7223	5.27387e-54	2.36552e-51	[KOG0143] Iron/ascorbate family oxidoreductases; [GO:0055114] oxidation-reduction process; [PF14226] non-haem dioxygenase in morphine synthesis N-terminal; [GO:0016706] oxidoreductase activity, acting on paired donors, with incorporation or reduction of molecular oxygen, 2-oxoglutarate as one donor, and incorporation of one atom each of oxygen into both donors; [PTHR10209] OXIDOREDUCTASE, 2OG-FE(…
Mapoly0103s0042	314	721	605	546	546.5	47.2354	0	0	0	0	0	0	0	-24.9276	-15.2261	-25.4253	7.39391e-54	3.24105e-51
Mapoly0077s0046	982	1126	975	835	979.5	36.6265	67	27	49	16	39.75	1.53342	0.932754	-4.62302	7.5988	-4.97645	1.55963e-53	6.68459e-51
Mapoly0023s0014	546	972	711	792	755.25	43.5126	21	17	23	13	18.5	1.23834	1.28581	-5.35136	6.90901	-5.65433	2.51891e-52	1.05613e-49
Mapoly0144s0008	327.432	604.538	515.259	527.109	493.585	31.083	0	0	1.89106	2.02743	0.979622	0	0.111422	-8.97683	4.53811	-9.18611	1.66411e-51	6.82886e-49	[PTHR14952] FAMILY NOT NAMED
Mapoly0018s0003	351	525	290	401	391.75	7.30235	2	0	0	0	0.5	0.0134491	0	-9.61374	3.69427	-10.1481	2.83978e-51	1.14106e-48	[GO:0003677] DNA binding; [GO:0005524] ATP binding; [PTHR10799] SWI/SNF-RELATED MATRIX-ASSOCIATED ACTIN-DEPENDENT REGULATOR OF CHROMATIN SUBFAMILY-RELATED; [PF00176] SNF2 family N-terminal domain; [KOG0390] DNA repair protein, SNF2 family; [PF00271] Helicase conserved C-terminal domain
Mapoly0020s0070	5548	11005	13573	12515	10660.2	1459.25	451	246	392	318	351.75	37.8437	42.1846	-4.92155	10.9593	-5.25272	1.76529e-50	6.9484e-48
Mapoly0049s0051	1332	3793	3004	3126	2813.75	142.095	14	35	23	33	26.25	1.10821	1.29515	-6.74403	8.18228	-6.95136	1.15242e-48	4.44535e-46	[PF02825] WWE domain
Mapoly0186s0014	325	822	692	732	642.75	50.3585	4	3	4	2	3.25	0.224282	0.196594	-7.62767	5.54339	-7.96657	2.07355e-48	7.84168e-46	[PTHR32133] FAMILY NOT NAMED; [GO:0005515] protein binding; [PF00646] F-box domain
Mapoly0013s0021	274	373	270	316	308.25	14.6674	0	0	1	1	0.5	0	0.0434041	-9.26791	3.69714	-9.46204	8.21987e-48	3.04878e-45	[PTHR31762] FAMILY NOT NAMED
Mapoly0106s0036	272	960	566	825	655.75	13.3858	0	1	1	0	0.5	0.00993047	0.00745707	-10.357	4.23191	-10.6517	3.69046e-47	1.34298e-44
Mapoly0006s0124	525	998	876	860	814.75	27.5893	27	13	33	11	21	0.539276	0.608867	-5.2779	7.0317	-5.64934	2.32853e-46	8.31672e-44	[GO:0003723] RNA binding; [GO:0008168] methyltransferase activity; [GO:0032259] methylation; [PF01728] FtsJ-like methyltransferase; [PTHR32319] FAMILY NOT NAMED; [K06442] putative hemolysin; [PTHR32319:SF0] SUBFAMILY NOT NAMED; [PF01479] S4 domain
Mapoly0053s0091	289	434	337	443	375.75	19.9526	2	1	2	2	1.75	0.0640963	0.0959185	-7.74626	4.71531	-8.02532	3.68894e-46	1.29361e-43
Mapoly0087s0048	330	655	499	487	492.75	42.1852	6	1	4	3	3.5	0.224444	0.26293	-7.13735	5.37534	-7.49875	4.30961e-46	1.48427e-43
Mapoly0012s0046	232	475	372	328	351.75	28.5956	0	0	0	0	0	0	0	-24.2919	-15.2261	-24.7798	8.33959e-46	2.82185e-43
Mapoly0051s0064	241	499	338	393	367.75	16.5209	1	1	0	0	0.5	0.0381037	0	-9.52253	3.78889	-9.82738	2.00885e-45	6.68012e-43	[PF00651] BTB/POZ domain; [PTHR24411] FAMILY NOT NAMED; [PF00917] MATH domain; [GO:0005515] protein binding; [KOG1987] Speckle-type POZ protein SPOP and related proteins with TRAF, MATH and BTB/POZ domains
Mapoly0027s0181	1846	4507	3873	3956	3545.5	209.965	45	71	26	18	40	2.98486	1.12159	-6.46984	8.61797	-6.74237	6.57022e-45	2.14779e-42
Mapoly0045s0085	223	473	371	325	348	21.8463	0	0	0	0	0	0	0	-24.2765	-15.2261	-24.766	6.85098e-45	2.20225e-42	[PTHR32133] FAMILY NOT NAMED
Mapoly0004s0047	215	989	746	843	698.25	40.4552	0	0	1	0	0.25	0	0.0209776	-11.4475	3.67734	-11.9689	2.63682e-44	8.3371e-42	[PF03195] Protein of unknown function DUF260
Mapoly0147s0040	1299	6485	5204	5462	4612.5	219.848	2	12	1	7	5.5	0.308128	0.18935	-9.7119	7.46093	-9.85585	8.13434e-44	2.53043e-41
Mapoly0034s0019	219	623	579	415	459	64.4896	0	0	0	0	0	0	0	-24.6759	-15.2261	-25.1833	1.04412e-43	3.1965e-41
Mapoly0003s0109	2388	4015	3331	3467	3300.25	74.8591	64	88	112	156	105	1.50229	2.81882	-4.97411	9.27667	-5.17918	2.01634e-43	6.07643e-41
Mapoly0015s0187	213	241	215	267	234	19.0527	0	0	0	0	0	0	0	-23.7039	-15.2261	-24.1748	2.25552e-43	6.69263e-41
Mapoly0030s0138	1447	1633	1060	1162	1325.5	128.748	74	21	107	63	66.25	3.07162	6.50205	-4.32247	8.20218	-4.61606	3.40056e-43	9.93736e-41	[PF00645] Poly(ADP-ribose) polymerase and DNA-Ligase Zn-finger region; [GO:0003677] DNA binding; [PTHR15447] POLY [ADP-RIBOSE] POLYMERASE; [GO:0008270] zinc ion binding
Mapoly0013s0053	280	562	464	485	447.75	41.7424	1	0	1	4	1.5	0.0329027	0.230854	-8.22157	4.80797	-8.37097	3.82585e-43	1.10133e-40
Mapoly0010s0167	217	534	417	391	389.75	11.8657	0	0	0	1	0.25	0	0.0164161	-10.6063	3.4964	-10.6013	5.42101e-43	1.53757e-40	[PTHR22812] CHROMOBOX PROTEIN; [PF00385] Chromo (CHRromatin Organisation MOdifier) domain
Mapoly0184s0012	232	835	836	707	652.5	49.4019	0	2	0	0	0.5	0.0730039	0	-10.3498	4.32828	-10.4729	8.26602e-43	2.30212e-40
Mapoly0029s0128	275	209	157	190	207.75	8.17044	0	0	0	0	0	0	0	-23.5322	-15.2261	-23.9595	8.3553e-43	2.30212e-40
Mapoly0056s0047	3431	3172	2390	2570	2890.75	219.734	194	120	200	291	201.25	10.055	17.9197	-3.84438	9.61091	-4.03718	9.80735e-43	2.66415e-40
Mapoly0111s0027	199	443	302	360	326	36.5003	1	0	0	0	0.25	0.0395744	0	-10.3486	3.07675	-10.9131	1.44424e-42	3.86877e-40
Mapoly0105s0049	244	244	258	280	256.5	30.7165	2	1	1	1	1.25	0.145744	0.109051	-7.68087	4.17664	-7.97751	2.03387e-42	5.37358e-40
Mapoly0039s0090	185	422	387	406	350	41.0339	0	0	0	0	0	0	0	-24.2847	-15.2261	-24.7905	9.42318e-42	2.45601e-39
Mapoly0002s0025	192	272	206	274	236	6.23694	0	0	0	0	0	0	0	-23.7162	-15.2261	-24.193	1.28125e-41	3.25184e-39
Mapoly0003s0084	242	289	194	280	251.25	7.35167	0	2	0	0	0.5	0.0294015	0	-8.97293	3.60921	-9.0348	1.28138e-41	3.25184e-39
Mapoly0007s0097	305	766	657	783	627.75	16.4034	4	1	9	4	4.5	0.0491996	0.140325	-7.12412	5.74786	-7.49655	1.59013e-41	3.98298e-39
Mapoly0092s0072	235	238	207	193	218.25	7.86055	2	0	0	1	0.75	0.0261683	0.0195311	-8.18484	3.66913	-8.49119	1.84585e-41	4.56423e-39	[PF00923] Transaldolase; [PTHR10683] TRANSALDOLASE; [K00616] transaldolase [EC:2.2.1.2]; [KOG2772] Transaldolase; [GO:0005975] carbohydrate metabolic process; [2.2.1.2] Transaldolase.; [PTHR10683:SF3] TRANSALDOLASE 1
Mapoly4078s0001	1015	1985	2486	2671	2039.25	168.594	93	64	107	86	87.5	5.23069	6.90062	-4.54261	8.773	-4.86041	6.96576e-41	1.70061e-38	[GO:0005524] ATP binding; [KOG1353] F0F1-type ATP synthase, alpha subunit; [3.6.3.14] H(+)-transporting two-sector ATPase.; [K02111] F-type H+-transporting ATPase subunit alpha [EC:3.6.3.14]; [PF00006] ATP synthase alpha/beta family, nucleotide-binding domain; [GO:0015991] ATP hydrolysis coupled proton transport; [GO:0033178] proton-transporting two-sector ATPase complex, catalytic domain; [GO:00…
Mapoly0022s0113	1721	1293	1006	1045	1266.25	92.2797	9	42	8	17	19	1.82138	0.910841	-6.05842	7.35038	-6.14431	2.55019e-40	6.14819e-38	[KOG0710] Molecular chaperone (small heat-shock protein Hsp26/Hsp42); [PTHR11527] SMALL HEAT-SHOCK PROTEIN (HSP20) FAMILY; [PF00011] Hsp20/alpha crystallin family
Mapoly0004s0305	217	254	143	197	202.75	8.76385	0	0	0	0	0	0	0	-23.4971	-15.2261	-23.943	2.91306e-40	6.93632e-38
Mapoly0161s0028	169	347	267	301	271	9.75187	1	0	0	0	0.25	0.0127056	0	-10.0821	2.94417	-10.6479	6.90046e-40	1.62304e-37	[PTHR24012] FAMILY NOT NAMED; [GO:0003676] nucleic acid binding; [PF00076] RNA recognition motif. (a.k.a. RRM, RBD, or RNP domain)
Mapoly0015s0135	168	368	355	294	296.25	21.5183	0	0	0	0	0	0	0	-24.0442	-15.2261	-24.5456	1.28734e-39	2.99145e-37
Mapoly0059s0061	166	410	367	329	318	53.4334	0	0	0	0	0	0	0	-24.1464	-15.2261	-24.6506	1.80302e-39	4.13985e-37
Mapoly0049s0050	349	889	692	691	655.25	41.6705	0	6	11	2	4.75	0.186659	0.323693	-7.10797	5.84239	-7.41377	2.23591e-39	5.02322e-37
Mapoly0039s0097	215	465	333	384	349.25	15.399	0	2	1	2	1.25	0.0433762	0.0627989	-8.12617	4.51003	-8.24626	2.23983e-39	5.02322e-37
Mapoly0008s0184	204	384	304	364	314	6.81189	1	2	2	1	1.5	0.0291093	0.0275649	-7.70964	4.49041	-7.97831	3.14307e-39	6.96785e-37	[GO:0016020] membrane; [PTHR11101] PHOSPHATE TRANSPORTER; [PF01384] Phosphate transporter family; [KOG2493] Na+/Pi symporter; [GO:0006817] phosphate ion transport; [GO:0005315] inorganic phosphate transmembrane transporter activity; [K14640] SLC20A, PIT; solute carrier family 20 (sodium-dependent phosphate transporter)
Mapoly0046s0019	2648	2803	1754	2303	2377	132.389	451	251	458	363	380.75	16.2795	20.7585	-2.64223	9.90147	-2.90043	5.56831e-39	1.22041e-36	[GO:0008080] N-acetyltransferase activity; [PF00583] Acetyltransferase (GNAT) family; [KOG3396] Glucosamine-phosphate N-acetyltransferase; [PTHR13355] GLUCOSAMINE 6-PHOSPHATE N-ACETYLTRANSFERASE; [K00621] glucosamine-phosphate N-acetyltransferase [EC:2.3.1.4]; [2.3.1.4] Glucosamine-phosphate N-acetyltransferase.
Mapoly0002s0269	159.217	528.372	501.516	413.678	400.696	42.4567	0	0	1.02225	0	0.255563	0	0.0393645	-10.6145	3.2902	-11.1312	2.39247e-38	5.18467e-36
Mapoly0027s0031	199	484	413	401	374.25	8.64935	0	0	0	3	0.75	0	0.0363123	-8.96286	4.26214	-8.96282	4.98093e-38	1.06741e-35	[PTHR10742] AMINE OXIDASE; [PF01593] Flavin containing amine oxidoreductase; [GO:0055114] oxidation-reduction process; [GO:0005515] protein binding; [PF04433] SWIRM domain; [GO:0016491] oxidoreductase activity; [KOG0029] Amine oxidase
Mapoly0008s0105	330	809	707	595	610.25	71.3974	8	3	13	11	8.75	0.500457	1.23343	-6.12397	6.23382	-6.42723	8.55466e-38	1.81312e-35
Mapoly0020s0055	216	493	401	540	412.5	6.54332	0	2	2	3	1.75	0.015673	0.0363578	-7.88088	4.86578	-8.04202	1.02941e-37	2.15807e-35
Mapoly0126s0001	4190	4075	3797	2991	3763.25	137.251	836	282	468	395	495.25	16.3169	14.3285	-2.92575	10.406	-3.22693	1.60617e-37	3.33099e-35	[GO:0016020] membrane; [PTHR11101] PHOSPHATE TRANSPORTER; [PF01384] Phosphate transporter family; [GO:0006817] phosphate ion transport; [GO:0005315] inorganic phosphate transmembrane transporter activity
Mapoly0003s0291	442	412	323	411	397	17.7766	8	6	12	15	10.25	0.266457	0.569255	-5.27544	6.03783	-5.47383	1.68145e-37	3.45001e-35
Mapoly0051s0110	1850	4055	3381	3133	3104.75	134.574	359	189	345	232	281.25	9.50679	10.8035	-3.46455	9.89301	-3.79196	7.40423e-37	1.50321e-34	[KOG2855] Ribokinase; [PF00294] pfkB family carbohydrate kinase; [PTHR10584] SUGAR KINASE
Mapoly0046s0117	1702.25	4177.79	3008.22	3797.62	3171.47	84.5417	252.277	104.457	266.075	138.963	190.443	3.372	4.29346	-4.05772	9.61626	-4.41619	1.00639e-36	2.02189e-34
Mapoly0060s0067	596	795	608	796	698.75	23.436	31	47	26	18	30.5	1.15742	0.648743	-4.51789	7.2335	-4.76242	1.22743e-36	2.44056e-34	[PTHR23315] BETA CATENIN-RELATED ARMADILLO REPEAT-CONTAINING; [PF13646] HEAT repeats
Mapoly0071s0015	455	927	611	722	678.75	14.6208	35	19	33	32	29.75	0.469955	0.629141	-4.51192	7.18616	-4.79729	3.29143e-36	6.47775e-34
Mapoly0022s0060	250.118	416.635	291.398	357.936	329.022	15.0854	2.14162	6.45081	0	0	2.14811	0.181802	0	-7.25896	4.8124	-7.44288	4.33812e-36	8.45145e-34	[PTHR10774] EXTENDED SYNAPTOTAGMIN-RELATED; [KOG1030] Predicted Ca2+-dependent phospholipid-binding protein; [PF00168] C2 domain; [GO:0005515] protein binding
Mapoly0061s0034	190	345	252	261	262	8.70138	3	3	2	0	2	0.0902417	0.0262897	-7.03341	4.51976	-7.37607	4.61809e-36	8.87504e-34
Mapoly0112s0028	151	370	236	271	257	5.71166	1	0	1	0	0.5	0.00785702	0.00821331	-9.00558	3.42351	-9.53302	4.64758e-36	8.87504e-34	[GO:0003677] DNA binding; [GO:0005524] ATP binding; [PTHR10799] SWI/SNF-RELATED MATRIX-ASSOCIATED ACTIN-DEPENDENT REGULATOR OF CHROMATIN SUBFAMILY-RELATED; [PF00176] SNF2 family N-terminal domain; [KOG0390] DNA repair protein, SNF2 family; [PF00271] Helicase conserved C-terminal domain
Mapoly0063s0066	138	426	394	357	328.75	17.7555	0	1	1	0	0.5	0.0261691	0.0196511	-9.3608	3.73721	-9.66225	3.01359e-35	5.69835e-33
Mapoly0022s0034	196	341	331	269	284.25	14.7894	1	3	1	3	2	0.095343	0.10174	-7.151	4.68566	-7.29659	3.08794e-35	5.78225e-33
Mapoly0064s0107	132	176	139	166	153.25	15.7623	0	0	1	0	0.25	0	0.0385079	-9.25964	2.55888	-9.73201	4.01557e-35	7.44695e-33
Mapoly0051s0083	127	313	245	240	231.25	6.91038	0	0	1	0	0.25	0	0.0109893	-9.85321	2.869	-10.3523	4.29144e-35	7.88276e-33
Mapoly0089s0011	226	377	329	312	311	6.74799	3	6	0	1	2.5	0.0874758	0.0115022	-6.95883	4.87912	-7.15939	4.58159e-35	8.33633e-33
Mapoly0012s0201	271	869	680	774	648.5	26.8997	11	7	7	12	9.25	0.296207	0.358369	-6.13151	6.34428	-6.40408	4.96506e-35	8.94963e-33
Mapoly0022s0128	3952	3441	3188	3092	3418.25	93.7149	967	640	1034	592	808.25	18.5768	19.6433	-2.08038	10.6996	-2.357	6.65456e-35	1.18839e-32	[PF02042] RWP-RK domain; [PTHR10270] SOX TRANSCRIPTION FACTOR
Mapoly0067s0078	138	211	192	234	193.75	139.312	0	0	0	1	0.25	0	0.379754	-9.59795	2.98829	-9.58506	1.04561e-34	1.85015e-32	[PTHR10966:SF0] TRANSCRIPTION INITIATION FACTOR IIA SUBUNIT 2; [PF02751] Transcription initiation factor IIA, gamma subunit; [PTHR10966] TRANSCRIPTION INITIATION FACTOR IIA SUBUNIT 2; [KOG3463] Transcription initiation factor IIA, gamma subunit; [GO:0005672] transcription factor TFIIA complex; [GO:0006367] transcription initiation from RNA polymerase II promoter; [PF02268] Transcription initiatio…
Mapoly0004s0217	134	337	255	248	243.5	31.7433	0	1	1	0	0.5	0.0638921	0.0479784	-8.92773	3.51229	-9.21241	1.11515e-34	1.95526e-32	[GO:0005524] ATP binding; [PF00069] Protein kinase domain; [GO:0004672] protein kinase activity; [PTHR24349] SERINE/THREONINE-PROTEIN KINASE; [GO:0006468] protein phosphorylation
Mapoly0161s0029	126	243	229	177	193.75	16.3715	0	0	0	0	0	0	0	-23.4316	-15.2261	-23.9241	1.62535e-34	2.82416e-32
Mapoly0113s0029	198	368	306	356	307	7.39277	6	4	3	3	4	0.0986463	0.0649264	-6.26209	5.1648	-6.56728	1.79083e-34	3.08391e-32
Mapoly0169s0032	178	378	300	251	276.75	8.57997	2	3	2	2	2.25	0.0678285	0.0557474	-6.9425	4.7029	-7.18327	2.32783e-34	3.97317e-32
Mapoly0079s0041	178	596	418	465	414.25	12.5621	0	4	0	1	1.25	0.0590225	0.0158226	-8.37241	4.66523	-8.4602	1.31252e-33	2.22057e-31
Mapoly0087s0002	1040	1676	1248	2239	1550.75	33.8268	52	90	91	98	82.75	1.36443	1.85797	-4.22806	8.55709	-4.45529	1.32506e-33	2.22229e-31	[GO:0005515] protein binding; [PF13414] TPR repeat; [PF00856] SET domain; [PF00515] Tetratricopeptide repeat; [PTHR22904] TPR REPEAT CONTAINING PROTEIN
Mapoly0092s0022	118	253	172	222	191.25	10.4435	0	0	0	0	0	0	0	-23.4128	-15.2261	-23.9047	1.51194e-33	2.51387e-31
Mapoly0023s0177	1601	1804	1480	1883	1692	57.8746	362	272	370	325	332.25	9.11245	10.7275	-2.34839	9.57929	-2.6078	3.5979e-33	5.931e-31	[PF07004] Sperm-tail PG-rich repeat
Mapoly0178s0025	192	366	214	221	248.25	22.4034	5	3	3	2	3.25	0.296954	0.1981	-6.2552	4.83741	-6.56436	4.80349e-33	7.85127e-31	[KOG4172] Predicted E3 ubiquitin ligase; [PF13920] Zinc finger, C3HC4 type (RING finger)
Mapoly0066s0088	113	316	202	274	226.25	7.24059	0	0	0	0	0	0	0	-23.6553	-15.2261	-24.1568	8.715e-33	1.41249e-30	[PF00450] Serine carboxypeptidase; [PTHR11802] SERINE PROTEASE FAMILY S10 SERINE CARBOXYPEPTIDASE; [KOG1282] Serine carboxypeptidases (lysosomal cathepsin A); [GO:0004185] serine-type carboxypeptidase activity; [GO:0006508] proteolysis
Mapoly0074s0016	477	968	557	843	711.25	25.7339	55	40	53	37	46.25	1.422	1.42137	-3.94283	7.53097	-4.24124	8.9706e-33	1.4418e-30
Mapoly0002s0247	568	701	712	579	640	45.8088	50	23	44	51	42	2.10316	3.1316	-3.92961	7.39062	-4.1936	9.10809e-33	1.4518e-30
Mapoly0002s0298	193	276	223	196	222	5.53451	6	4	2	2	3.5	0.103558	0.0454413	-5.98705	4.81624	-6.28055	1.05786e-32	1.67238e-30
Mapoly0002s0053	173	440	407	370	347.5	6.40639	0	1	5	3	2.25	0.00897626	0.0625786	-7.27093	4.86798	-7.5465	1.18294e-32	1.85491e-30
Mapoly0111s0050	1313	1403	1189	1285	1297.5	59.1356	15	75	25	30	36.25	1.73933	1.04268	-5.16161	7.84163	-5.30317	2.01153e-32	3.12874e-30	[KOG1577] Aldo/keto reductase family proteins; [PTHR11732] ALDO/KETO REDUCTASE; [PF00248] Aldo/keto reductase family
Mapoly0008s0111	522	345	264	337	367	11.1598	8	5	22	11	11.5	0.169017	0.445326	-4.99607	6.00925	-5.24371	8.81804e-32	1.36059e-29
Mapoly0018s0032	640	1217	761	894	878	21.6277	8	22	0	3	8.25	0.339301	0.0397341	-6.73368	6.49751	-6.90361	1.21761e-31	1.86381e-29	[PF15628] RRM in Demeter; [PTHR10359] A/G-SPECIFIC ADENINE GLYCOSYLASE/ENDONUCLEASE III
Mapoly0040s0066	310	1168	869	1037	846	35.892	1	10	14	11	9	0.219994	0.457878	-6.55459	6.53844	-6.79045	3.38975e-31	5.14788e-29
Mapoly0088s0046	101	253	157	167	169.5	6.70097	0	0	0	0	0	0	0	-23.2387	-15.2261	-23.7278	5.95618e-31	8.97475e-29
Mapoly0170s0039	125	150	95	117	121.75	2.25732	0	0	2	0	0.5	0	0.0140812	-7.92773	2.8826	-8.37946	7.82608e-31	1.16481e-28	[PF13855] Leucine rich repeat; [GO:0005524] ATP binding; [KOG1187] Serine/threonine protein kinase; [PF00069] Protein kinase domain; [GO:0005515] protein binding; [GO:0004672] protein kinase activity; [PF00560] Leucine Rich Repeat; [PF12819] Carbohydrate-binding protein of the ER; [GO:0006468] protein phosphorylation; [PTHR24420] LEUCINE-RICH REPEAT RECEPTOR-LIKE PROTEIN KINASE
Mapoly0015s0184	108	137	154	130	132.25	14.2205	0	0	0	1	0.25	0	0.0571285	-9.04703	2.70891	-9.02629	7.85116e-31	1.16481e-28
Mapoly0012s0090	281	210	282	226	249.75	1.56382	11	2	2	0	3.75	0.0312734	0.00474335	-6.05744	4.8611	-6.50412	1.34283e-30	1.97703e-28	[GO:0003677] DNA binding; [GO:0006355] regulation of transcription, DNA-dependent; [KOG0956] PHD finger protein AF10; [PF05920] Homeobox KN domain
Mapoly0114s0004	105	151	121	114	122.75	15.0093	0	1	0	0	0.25	0.061043	0	-8.93948	2.5976	-9.01158	2.51044e-30	3.6681e-28
Mapoly0129s0010	89	329	264	262	236	7.67877	0	0	0	0	0	0	0	-23.7162	-15.2261	-24.2316	3.44322e-30	4.99318e-28
Mapoly0015s0131	110	270	176	250	201.5	9.80368	0	1	0	1	0.5	0.023822	0.0255445	-8.65459	3.49533	-8.70121	3.68376e-30	5.30214e-28
Mapoly0006s0142	148	281	244	220	223.25	6.5889	0	2	1	4	1.75	0.0290773	0.073277	-6.99515	4.44841	-7.07497	4.32338e-30	6.15865e-28
Mapoly0064s0008	221	378	270	291	290	5.57025	11	9	7	2	7.25	0.161274	0.0706198	-5.32192	5.5254	-5.6506	4.3427e-30	6.15865e-28	[PTHR24413] FAMILY NOT NAMED; [PF00651] BTB/POZ domain; [GO:0005515] protein binding
Mapoly0031s0180	111	193	203	184	172.75	7.34678	0	2	0	0	0.5	0.0416992	0	-8.43249	3.3573	-8.53098	4.43817e-30	6.2481e-28
Mapoly0052s0009	512	1701	1330	1703	1311.5	56.6632	65	70	78	59	68	2.43871	2.54625	-4.26954	8.28074	-4.57082	5.41931e-30	7.57407e-28
Mapoly0031s0047	87	217	221	225	187.5	44.1233	0	0	1	0	0.25	0	0.0870388	-9.55065	2.72533	-10.0649	6.30097e-30	8.74294e-28
Mapoly0032s0086	276	677	495	508	489	21.1391	12	18	10	4	11	0.564613	0.250245	-5.47426	6.24135	-5.76275	8.23489e-30	1.13447e-27
Mapoly0048s0011	111	294	208	253	216.5	10.3275	3	0	0	0	0.75	0.0502284	0	-8.17323	3.57905	-8.74776	1.05918e-29	1.44882e-27
Mapoly0004s0151	838	1452	1074	1389	1188.25	25.2682	232	110	170	124	159	2.90542	2.73703	-2.90174	8.7804	-3.2262	1.17333e-29	1.59366e-27	[GO:0016567] protein ubiquitination; [PF00514] Armadillo/beta-catenin-like repeat; [GO:0005515] protein binding; [PTHR23315:SF7] ANKYRIN-REPEAT-ARM DOMAIN PROTEIN; [GO:0004842] ubiquitin-protein ligase activity; [PTHR23315] BETA CATENIN-RELATED ARMADILLO REPEAT-CONTAINING; [PF04564] U-box domain
Mapoly2667s0001	99	261	192	269	205.25	9.89524	0	0	2	0	0.5	0	0.0352348	-8.68119	3.28714	-9.18853	1.29845e-29	1.74982e-27	[KOG0698] Serine/threonine protein phosphatase; [PTHR13832] PROTEIN PHOSPHATASE 2C; [PF00481] Protein phosphatase 2C; [GO:0003824] catalytic activity
Mapoly0003s0119	85	180	182	164	152.75	22.2817	0	0	0	0	0	0	0	-23.0885	-15.2261	-23.5929	1.31199e-29	1.74982e-27
Mapoly0029s0013	173	248	204	230	213.75	4.10974	3	6	2	0	2.75	0.0778973	0.0143458	-6.28034	4.63855	-6.54337	1.32226e-29	1.74982e-27
Mapoly0006s0245	384	812	616	637	612.25	13.656	0	7	2	14	5.75	0.0768462	0.181293	-6.73441	6.0463	-6.7921	1.32459e-29	1.74982e-27	[3.6.3.6] Proton-exporting ATPase.; [K01535] H+-transporting ATPase [EC:3.6.3.6]; [GO:0000166] nucleotide binding; [PF00702] haloacid dehalogenase-like hydrolase; [KOG0205] Plasma membrane H+-transporting ATPase; [PTHR24093] FAMILY NOT NAMED; [PF00690] Cation transporter/ATPase, N-terminus; [GO:0046872] metal ion binding; [PF00122] E1-E2 ATPase
Mapoly0042s0083	144	110	75	97	106.5	7.77832	0	0	0	1	0.25	0	0.0403838	-8.73461	2.5232	-8.65487	1.43549e-29	1.88343e-27
Mapoly0044s0079	552	1506	1173	1298	1132.25	46.3478	35	73	64	34	51.5	1.95791	1.68611	-4.45848	7.97679	-4.73353	1.64633e-29	2.14546e-27	[PF01501] Glycosyl transferase family 8; [PTHR13778] GLYCOSYLTRANSFERASE 8 DOMAIN-CONTAINING PROTEIN; [PTHR13778:SF1] SUBFAMILY NOT NAMED; [GO:0016757] transferase activity, transferring glycosyl groups
Mapoly0040s0036	511	1012	819	832	793.5	50.9118	11	40	20	28	24.75	1.5127	1.42242	-5.00273	7.22521	-5.18251	2.29971e-29	2.97682e-27
Mapoly0057s0104	152	215	208	198	193.25	11.1345	3	2	1	5	2.75	0.118587	0.174452	-6.13488	4.61257	-6.31365	2.57616e-29	3.31243e-27
Mapoly0041s0001	122	431	431	333	329.25	14.6177	1	3	0	0	1	0.079721	0	-8.36301	4.28168	-8.58823	2.67075e-29	3.41131e-27
Mapoly0088s0052	802	1479	1164	1107	1138	128.746	195	86	89	56	106.5	12.6506	7.09986	-3.41758	8.44518	-3.76901	3.02309e-29	3.83595e-27
Mapoly1745s0001	85	260	174	194	178.25	13.0397	0	0	0	0	0	0	0	-23.3113	-15.2261	-23.8138	3.24223e-29	4.08712e-27	[PTHR10343] 5'-AMP-ACTIVATED PROTEIN KINASE , BETA SUBUNIT; [GO:0005515] protein binding; [PF04739] 5'-AMP-activated protein kinase beta subunit, interation domain
Mapoly0150s0010	472	927	865	739	750.75	26.6055	52	9	48	24	33.25	0.806734	1.07519	-4.49691	7.29807	-4.88417	3.65424e-29	4.57658e-27	[PF03083] Sugar efflux transporter for intercellular exchange; [KOG1623] Multitransmembrane protein; [PTHR10791] RAG1-ACTIVATING PROTEIN 1
Mapoly0084s0008	109	111	74	78	93	3.39893	0	0	0	0	0	0	0	-22.3727	-15.2261	-22.8104	4.38904e-29	5.46138e-27	[PTHR11005] LYSOSOMAL ACID LIPASE-RELATED; [PF04083] Partial alpha/beta-hydrolase lipase region; [KOG2624] Triglyceride lipase-cholesterol esterase; [PF12697] Alpha/beta hydrolase family; [GO:0006629] lipid metabolic process
Mapoly0059s0052	1030	2082	1531	1895	1634.5	60.9351	314	165	229	184	223	7.13026	6.71663	-2.87373	9.26346	-3.19271	6.87518e-29	8.5001e-27	[KOG0331] ATP-dependent RNA helicase; [GO:0005524] ATP binding; [PF00270] DEAD/DEAH box helicase; [PF00271] Helicase conserved C-terminal domain; [PTHR24031] FAMILY NOT NAMED; [GO:0003676] nucleic acid binding
Mapoly0365s0001	81	118	104	112	103.75	13.7487	1	0	0	0	0.25	0.0471672	0	-8.69687	2.24579	-9.25117	8.2258e-29	1.01052e-26	[KOG0841] Multifunctional chaperone (14-3-3 family); [PF00244] 14-3-3 protein; [GO:0019904] protein domain specific binding; [PTHR18860] 14-3-3 PROTEIN
Mapoly0069s0001	206	275	279	335	273.75	2.956	7	11	7	6	7.75	0.0861592	0.0628361	-5.14252	5.58362	-5.38903	1.12045e-28	1.36773e-26	[GO:0016020] membrane; [KOG2301] Voltage-gated Ca2+ channels, alpha1 subunits; [PTHR10037] VOLTAGE-GATED CATION CHANNEL (CALCIUM AND SODIUM); [PF00520] Ion transport protein; [GO:0055085] transmembrane transport; [K04857] voltage-dependent calcium channel L type alpha-1S; [GO:0006811] ion transport; [GO:0005216] ion channel activity
Mapoly0125s0013	78	168	125	150	130.25	16.8338	0	0	0	0	0	0	0	-22.8587	-15.2261	-23.3538	1.66317e-28	2.01745e-26
Mapoly0094s0059	91	128	119.934	94	108.233	3.14791	0	1	0	0	0.25	0.0144854	0	-8.7579	2.50871	-8.8338	2.77485e-28	3.34491e-26
Mapoly0008s0133	705	1444	906.693	1295	1087.67	25.958	63.0655	58.7928	74.3078	108	76.0415	1.30188	2.48632	-3.83831	8.23602	-4.06407	3.51311e-28	4.20853e-26	[PF13868] Tumour suppressor, Mitostatin
Mapoly0167s0004	80	95	107	112	98.5	4.79903	0	0	0	0	0	0	0	-22.4556	-15.2261	-22.9397	4.13928e-28	4.92804e-26
Mapoly0121s0020	88	155	101	132	119	5.65075	1	0	0	1	0.5	0.0169201	0.0252571	-7.89477	3.00194	-8.13088	4.36516e-28	5.16509e-26	[PF00264] Common central domain of tyrosinase; [PF12142] Polyphenol oxidase middle domain; [GO:0055114] oxidation-reduction process; [PTHR11474] TYROSINASE; [GO:0016491] oxidoreductase activity; [GO:0008152] metabolic process; [GO:0004097] catechol oxidase activity; [PF12143] Protein of unknown function (DUF_B2219)
Mapoly0054s0025	88	80	81	86	83.75	4.28025	1	0	0	0	0.25	0.0184727	0	-8.38792	2.08006	-8.91971	5.12911e-28	6.03202e-26
Mapoly0045s0024	1165	948	591	884	897	25.0475	5	32	7	2	11.5	0.510779	0.106214	-6.2854	6.72485	-6.40925	5.76622e-28	6.74019e-26	[PF02170] PAZ domain; [PF08699] Domain of unknown function (DUF1785); [PTHR22891] EUKARYOTIC TRANSLATION INITIATION FACTOR 2C; [PF02171] Piwi domain; [GO:0005515] protein binding; [KOG1041] Translation initiation factor 2C (eIF-2C) and related proteins
Mapoly0021s0090	180	282	239	289	247.5	6.5124	3	5	8	8	6	0.0929391	0.18946	-5.36632	5.3354	-5.59088	5.86197e-28	6.81083e-26
Mapoly0147s0028	75	277	191	251	198.5	14.9736	0	0	0	0	0	0	0	-23.4665	-15.2261	-23.9808	6.66981e-28	7.70303e-26
Mapoly0032s0135	92	102	101	86	95.25	7.81718	0	1	0	0	0.25	0.0411435	0	-8.57355	2.41162	-8.63963	7.36745e-28	8.4581e-26
Mapoly0167s0001	73	137	120	135	116.25	5.17749	0	0	0	0	0	0	0	-22.6946	-15.2261	-23.1906	8.20346e-28	9.36214e-26
Mapoly0008s0242	169	236	199	153	189.25	11.6361	0	4	2	5	2.75	0.123148	0.211303	-6.10471	4.63041	-6.18722	1.13838e-27	1.29152e-25
Mapoly0590s0001	94	104	110	110	104.5	5.12508	0	1	2	0	0.75	0.0244269	0.0366857	-7.12236	3.14884	-7.45083	1.24736e-27	1.40689e-25
Mapoly0041s0091	124	277	306	274	245.25	3.76106	5	3	5	2	3.75	0.0504903	0.0451853	-6.03121	4.9417	-6.40115	1.44665e-27	1.62218e-25
Mapoly0031s0103	644	1354	942	1149	1022.25	16.6811	40	72	26	15	38.25	0.809305	0.286083	-4.74014	7.68382	-4.99457	1.50329e-27	1.67595e-25
Mapoly0171s0017	157	161	101	92	127.75	21.9092	4	2	1	0	1.75	0.429278	0.066146	-6.18981	3.85397	-6.53135	2.08818e-27	2.31464e-25
Mapoly0081s0031	96	182	179	182	159.75	8.55993	1	1	0	2	1	0.0450339	0.0562053	-7.31965	3.77873	-7.46873	3.00094e-27	3.30738e-25	[GO:0008519] ammonium transmembrane transporter activity; [GO:0016020] membrane; [GO:0015696] ammonium transport; [GO:0072488] ammonium transmembrane transport; [PTHR11730] AMMONIUM TRANSPORTER; [PF00909] Ammonium Transporter Family; [KOG0682] Ammonia permease; [PTHR11730:SF6] AMMONIUM TRANSPORTER
Mapoly0029s0124	181	807	506	764	564.5	30.7507	5	10	3	7	6.25	0.357524	0.256704	-6.49697	5.99636	-6.71173	3.35335e-27	3.67478e-25
Mapoly0015s0062	1856	4033	2793	3160	2960.5	98.2458	312	382	316	366	344	9.90919	10.2955	-3.10536	10.0412	-3.34657	3.97116e-27	4.32722e-25	[GO:0006284] base-excision repair; [GO:0006289] nucleotide-excision repair; [4.2.99.18] DNA-(apurinic or apyrimidinic site) lyase.; [GO:0008270] zinc ion binding; [3.2.2.23] DNA-formamidopyrimidine glycosylase.; [GO:0003906] DNA-(apurinic or apyrimidinic site) lyase activity; [GO:0016799] hydrolase activity, hydrolyzing N-glycosyl compounds; [GO:0003684] damaged DNA binding; [PF06831] Formamidopy…
Mapoly0052s0048	91	75	75	68	77.25	5.72038	0	0	0	0	0	0	0	-22.105	-15.2261	-22.5503	4.31503e-27	4.65793e-25	[PF03259] Roadblock/LC7 domain; [PTHR10779] DYNEIN LIGHT CHAIN ROADBLOCK; [KOG4115] Dynein-associated protein Roadblock
Mapoly0147s0041	93	79	92	64	82	2.51004	0	0	0	0	0	0	0	-22.1911	-15.2261	-22.6422	4.32296e-27	4.65793e-25	[KOG4742] Predicted chitinase; [GO:0006032] chitin catabolic process; [GO:0004568] chitinase activity; [PTHR22595] CHITINASE-RELATED; [GO:0016998] cell wall macromolecule catabolic process; [PF00182] Chitinase class I
Mapoly0132s0007	165	172	184	186	176.75	6.54482	0	4	0	5	2.25	0.0739156	0.0990753	-6.29563	4.47498	-6.30915	4.78502e-27	5.12715e-25
Mapoly0062s0083	70	150	107	146	118.25	3.48288	0	0	0	0	0	0	0	-22.7192	-15.2261	-23.2153	5.77717e-27	6.15604e-25	[GO:0003677] DNA binding; [PTHR15348:SF0] SUBFAMILY NOT NAMED; [PF01388] ARID/BRIGHT DNA binding domain; [KOG2744] DNA-binding proteins Bright/BRCAA1/RBP1 and related proteins containing BRIGHT domain; [GO:0005622] intracellular; [PTHR15348] AT-RICH INTERACTIVE DOMAIN-CONTAINING PROTEIN (ARID DOMAIN- CONTAINING PROTEIN) (DEAD RINGER PROTEIN) (B-CELL REGULATOR OF IGH TRANSCRIPTION) (BRIGHT)
Mapoly0008s0171	66	368	327	335	274	10.927	0	0	0	0	0	0	0	-23.9315	-15.2261	-24.4625	6.14712e-27	6.51426e-25
Mapoly0055s0108	87.4641	114.253	62.3875	93.2302	89.3337	7.15222	0	0	0	0	0	0	0	-22.3146	-15.2261	-22.7693	6.48448e-27	6.83421e-25
Mapoly0053s0079	201	277	188	204	217.5	8.17935	8	10	9	2	7.25	0.297471	0.168185	-4.90689	5.32012	-5.19856	1.02587e-26	1.07533e-24	[PTHR21648] FLAGELLAR RADIAL SPOKE PROTEIN 3; [PF06098] Radial spoke protein 3; [PTHR21648:SF0] SUBFAMILY NOT NAMED
Mapoly3078s0001	67	337	218	272	223.5	18.4435	0	0	0	0	0	0	0	-23.6376	-15.2261	-24.1565	1.16263e-26	1.21209e-24	[KOG0698] Serine/threonine protein phosphatase; [PTHR13832] PROTEIN PHOSPHATASE 2C; [PF00481] Protein phosphatase 2C; [GO:0003824] catalytic activity
Mapoly0106s0037	65	298	207	245	203.75	10.177	0	0	0	0	0	0	0	-23.5042	-15.2261	-24.0227	1.72305e-26	1.77884e-24
Mapoly0011s0204	97	191	166	189	160.75	2.60846	2	3	0	0	1.25	0.0352627	0	-7.00673	3.88146	-7.27666	1.7247e-26	1.77884e-24
Mapoly0094s0012	91	102	67	61	80.25	7.7119	0	0	1	0	0.25	0	0.0368107	-8.32633	2.07589	-8.76604	1.83899e-26	1.88662e-24
Mapoly0040s0080	337	361	261	340	324.75	4.38665	13	25	15	8	15.25	0.234082	0.135263	-4.41245	6.17323	-4.63448	1.86685e-26	1.90508e-24	[GO:0016020] membrane; [GO:0005524] ATP binding; [PF08370] Plant PDR ABC transporter associated; [GO:0016887] ATPase activity; [PTHR19241] ATP-BINDING CASSETTE TRANSPORTER; [PF01061] ABC-2 type transporter; [PF14510] ABC-transporter extracellular N-terminal; [KOG0065] Pleiotropic drug resistance proteins (PDR1-15), ABC superfamily; [PF00005] ABC transporter
Mapoly0002s0216	64	178	137	122	125.25	13.0751	0	0	0	0	0	0	0	-22.8022	-15.2261	-23.3032	3.58557e-26	3.63973e-24
Mapoly0118s0033	166	574	432	450	405.5	10.9303	9	7	9	12	9.25	0.148465	0.236605	-5.4541	6.00656	-5.72216	4.63444e-26	4.67981e-24
Mapoly0043s0089	147	351	295	298	272.75	1.45071	8	5	9	8	7.5	0.0279869	0.0399866	-5.18454	5.54467	-5.48353	4.91918e-26	4.94147e-24	[PF12780] P-loop containing dynein motor region D4; [PF12774] Hydrolytic ATP binding site of dynein motor region D1; [GO:0005524] ATP binding; [PF12775] P-loop containing dynein motor region D3; [GO:0005858] axonemal dynein complex; [GO:0030286] dynein complex; [PTHR10676] DYNEIN HEAVY CHAIN FAMILY PROTEIN; [PF03028] Dynein heavy chain and region D6 of dynein motor; [PF07728] AAA domain (dynein-r…
Mapoly0023s0005	152	103	64	87	101.5	3.63486	1	2	1	0	1	0.0507326	0.0140146	-6.66531	3.32823	-6.87501	9.28162e-26	9.27537e-24
Mapoly0075s0088	1179	3382	2627	2815	2500.75	185.332	34	110	23	43	52.5	4.852	2.28771	-5.5739	8.60511	-5.76533	9.4286e-26	9.37368e-24	[PF05938] Plant self-incompatibility protein S1
Mapoly0055s0095	68	204	179	225	169	13.7567	0	0	0	1	0.25	0	0.0421686	-9.40078	2.90378	-9.41603	1.30494e-25	1.29069e-23
Mapoly0117s0030	86	86	50	86	77	8.96401	0	0	0	0	0	0	0	-22.1003	-15.2261	-22.5452	2.18136e-25	2.14653e-23
Mapoly0033s0060	59	122	136	141	114.5	3.25599	0	0	0	0	0	0	0	-22.6727	-15.2261	-23.1845	2.30246e-25	2.25419e-23
Mapoly4299s0001	90	184	193	177	161	20.9824	0	3	1	1	1.25	0.19065	0.115866	-7.00897	3.94688	-7.16422	2.56463e-25	2.49819e-23
Mapoly0037s0070	98	171	147	149	141.25	3.48358	2	1	5	0	2	0.0296391	0.0456699	-6.14209	4.02775	-6.59137	3.14141e-25	3.04464e-23
Mapoly0053s0002	56.1811	181.238	138.436	169.613	136.367	12.4514	0	0	1	0	0.25	0	0.0332397	-9.09125	2.49514	-9.60453	4.51393e-25	4.35301e-23	[GO:0006355] regulation of transcription, DNA-dependent; [PF00847] AP2 domain; [GO:0003700] sequence-specific DNA binding transcription factor activity; [PTHR31241] FAMILY NOT NAMED
Mapoly0195s0008	78	135	127	92	108	3.84975	0	2	0	0	0.5	0.0352555	0	-7.75484	3.01243	-7.84125	5.60803e-25	5.3812e-23	[K08176] MFS transporter, PHS family, inorganic phosphate transporter; [PF00083] Sugar (and other) transporter; [GO:0016021] integral to membrane; [GO:0055085] transmembrane transport; [PTHR24064] FAMILY NOT NAMED; [KOG0252] Inorganic phosphate transporter; [GO:0022857] transmembrane transporter activity
Mapoly0021s0036	203	378	321	315	304.25	25.5909	24	9	8	7	12	0.999197	0.534564	-4.66415	5.92117	-5.02222	6.18476e-25	5.90522e-23
Mapoly0038s0042	81	83	53	59	69	3.75717	0	0	0	0	0	0	0	-21.942	-15.2261	-22.3791	7.15523e-25	6.79818e-23
Mapoly0186s0012	79	58	63	61	65.25	7.62678	0	0	0	0	0	0	0	-21.8614	-15.2261	-22.3058	8.73852e-25	8.26176e-23
Mapoly0081s0015	126	199	190	213	182	9.28099	0	6	0	1	1.75	0.150486	0.0268946	-6.70043	4.30365	-6.77835	9.31962e-25	8.76817e-23
Mapoly0001s0373	594	1373	1083	1278	1082	40.4189	56	91	61	95	75.75	2.39633	2.69668	-3.83631	8.24662	-4.05368	1.07652e-24	1.00791e-22
Mapoly0095s0059	216	374	303	299	298	7.60078	10	8	10	18	11.5	0.191628	0.338374	-4.6956	5.94239	-4.90688	1.39495e-24	1.29973e-22	[PF05050] Methyltransferase FkbM domain
Mapoly0098s0034	771	1248	909	1293	1055.25	31.316	124	178	123	112	134.25	3.91813	3.11693	-2.97459	8.61125	-3.21862	1.48125e-24	1.37351e-22	[GO:0016567] protein ubiquitination; [GO:0004842] ubiquitin-protein ligase activity; [PF04564] U-box domain
Mapoly0124s0005	523	475	488	466	488	57.9004	58	69	72	42	60.25	6.61906	5.92759	-3.01785	7.44505	-3.27015	2.06609e-24	1.90664e-22
Mapoly0013s0073	95	107	59	82	85.75	3.01304	0	2	0	0	0.5	0.0357692	0	-7.42202	2.82439	-7.46517	2.68274e-24	2.46391e-22
Mapoly0120s0010	328	643	511	498	495	23.8977	25	42	32	30	32.25	1.42738	1.33788	-3.94006	7.04478	-4.17657	3.099e-24	2.83272e-22	[PTHR21963] PF6
Mapoly0060s0004	108	347	296	345	274	16.6015	7	5	5	5	5.5	0.293754	0.267031	-5.6386	5.33202	-5.95227	3.57571e-24	3.25305e-22
Mapoly0001s0082	843	1052	872	916	920.75	11.1293	259	156	237	107	189.75	2.06901	1.77052	-2.27871	8.70741	-2.59854	3.91328e-24	3.54345e-22	[KOG0756] Mitochondrial tricarboxylate/dicarboxylate carrier proteins; [PTHR24089] FAMILY NOT NAMED; [PF00153] Mitochondrial carrier protein
Mapoly0004s0076	183	412	348	319	315.5	14.3966	19	11	22	10	15.5	0.551384	0.609428	-4.3473	6.14395	-4.69595	3.94695e-24	3.55724e-22
Mapoly0119s0051	517	687	474	598.787	569.197	13.3402	10	38	48	27	30.75	0.530556	0.763208	-4.21027	7.09611	-4.42933	4.10666e-24	3.68396e-22	[GO:0033926] glycopeptide alpha-N-acetylgalactosaminidase activity; [PF12899] Alkaline and neutral invertase; [PTHR31916] FAMILY NOT NAMED
Mapoly0032s0002	52	169	128	111	115	11.2284	0	0	0	0	0	0	0	-22.679	-15.2261	-23.1846	5.41495e-24	4.8351e-22
Mapoly0041s0027	106	195	165	183	162.25	7.98896	1	0	3	5	2.25	0.017392	0.18435	-6.17214	4.34233	-6.37058	6.16098e-24	5.47589e-22
Mapoly0060s0077	95	129	109	114	111.75	14.8936	0	1	0	4	1.25	0.0663951	0.284784	-6.48218	3.73411	-6.47323	6.1961e-24	5.48184e-22
Mapoly0088s0085	72	64	49	79	66	7.92327	0	0	0	0	0	0	0	-21.8779	-15.2261	-22.3307	6.86821e-24	6.04873e-22
Mapoly0115s0050	122	378	344	297	285.25	13.0145	3	2	5	8	4.5	0.0919647	0.272971	-5.98615	5.25141	-6.2211	7.67499e-24	6.72853e-22
Mapoly0006s0137	81	106	85	76	87	6.39363	3	0	1	0	1	0.079479	0.0276944	-6.44292	3.11898	-6.96052	8.50821e-24	7.42524e-22
Mapoly0015s0185	131	191	179	178	169.75	10.5399	9	7	3	2	5.25	0.413836	0.135149	-5.01495	4.91912	-5.32841	9.76745e-24	8.4858e-22
Mapoly0011s0160	426	927	718	778	712.25	13.8518	57	61	49	72	59.75	0.973269	1.08836	-3.57537	7.75767	-3.81331	1.06335e-23	9.19678e-22
Mapoly0053s0003	48.8189	110.762	106.564	123.387	97.383	12.5408	0	0	0	0	0	0	0	-22.4391	-15.2261	-22.9496	1.23294e-23	1.06159e-21
Mapoly0010s0162	240	587	573	594	498.5	17.7607	21	2	7	16	11.5	0.29547	0.387611	-5.43789	6.28348	-5.76493	1.27239e-23	1.09015e-21
Mapoly0002s0213	82	223	175	188	167	4.2807	0	3	3	2	2	0.0374902	0.0549531	-6.38369	4.283	-6.59772	1.27741e-23	1.09015e-21
Mapoly0101s0054	84	153	104	107	112	2.44651	3	2	0	2	1.75	0.0451134	0.0232851	-5.99999	3.86379	-6.22735	1.42989e-23	1.2149e-21	[PF12937] F-box-like; [GO:0005515] protein binding; [PTHR23125] F-BOX/LEUCINE RICH REPEAT PROTEIN
Mapoly0057s0055	53	151	135	81	105	9.83665	0	0	0	0	0	0	0	-22.5478	-15.2261	-23.0502	2.43428e-23	2.0592e-21
Mapoly0067s0025	54	105	62	94	78.75	10.6126	0	0	0	0	0	0	0	-22.1327	-15.2261	-22.6166	3.19451e-23	2.6905e-21
Mapoly0010s0193	69	89	77	76	77.75	3.18812	0	2	0	0	0.5	0.0409554	0	-7.28072	2.76786	-7.35211	3.34281e-23	2.80316e-21	[PTHR31676] FAMILY NOT NAMED; [PF04398] Protein of unknown function, DUF538
Mapoly0060s0051	78	124	91	98	97.75	6.80678	3	2	1	1	1.75	0.143989	0.0631821	-5.80366	3.72758	-6.10323	3.5086e-23	2.92946e-21
Mapoly0094s0026	48	102	119	95	91	11.2513	0	0	0	0	0	0	0	-22.3413	-15.2261	-22.8511	3.98416e-23	3.31218e-21
Mapoly0144s0015	74	192	167	209	160.5	9.75788	0	1	4	1	1.5	0.0294861	0.120186	-6.74145	3.98818	-7.087	4.06814e-23	3.36748e-21
Mapoly0084s0061	49	121	80	88	84.5	6.68343	0	0	0	0	0	0	0	-22.2344	-15.2261	-22.7271	4.84721e-23	3.99522e-21
Mapoly0055s0002	97	159	158	144	139.5	2.54312	7	0	3	2	3	0.0412939	0.0413891	-5.53915	4.32183	-5.97245	4.91233e-23	4.03166e-21
Mapoly0169s0002	45	163	122	138	117	5.97639	0	0	0	0	0	0	0	-22.7039	-15.2261	-23.2181	5.29391e-23	4.32642e-21
Mapoly0080s0083	133	215	221	199	192	9.04716	0	7	2	5	3.5	0.1623	0.159133	-5.7776	4.82886	-5.88206	5.91656e-23	4.81488e-21	[PTHR31818] FAMILY NOT NAMED; [PF10250] GDP-fucose protein O-fucosyltransferase; [PTHR31818:SF0] SUBFAMILY NOT NAMED
Mapoly0002s0293	175	276	227	219	224.25	6.17527	3	10.1881	5	10.0537	7.06045	0.168767	0.19874	-4.9892	5.41229	-5.1367	6.30683e-23	5.11092e-21
Mapoly0069s0059	48	156	105	183	123	16.051	0	0	0	0	0	0	0	-22.776	-15.2261	-23.2921	6.62948e-23	5.34991e-21
Mapoly0006s0125	67	146	145	106	116	7.86023	0	2	1	1	1	0.0663366	0.0604736	-6.85796	3.5407	-7.02074	8.86058e-23	7.12059e-21	[PF14368] Probable lipid transfer; [PTHR23201] EXTENSIN, PROLINE-RICH PROTEIN
Mapoly0091s0052	140	102	70	91	100.75	6.5464	5	3	0	1	2.25	0.227041	0.0394624	-5.4847	3.90008	-5.73413	1.5408e-22	1.23309e-20	[PF05641] Agenet domain; [PTHR31917] FAMILY NOT NAMED
Mapoly0071s0014	1241	2692	2202	2541	2169	75.3757	533	296	385	210	356	11.5441	8.74528	-2.60708	9.79684	-2.95709	1.67544e-22	1.3353e-20	[PF00657] GDSL-like Lipase/Acylhydrolase; [PTHR22835] ZINC FINGER FYVE DOMAIN CONTAINING PROTEIN; [GO:0016788] hydrolase activity, acting on ester bonds; [GO:0006629] lipid metabolic process
Mapoly0034s0114	104	132	121	109	116.5	2.80868	6	5	4	2	4.25	0.112095	0.0619867	-4.77672	4.48914	-5.07669	1.73665e-22	1.37838e-20
Mapoly0115s0004	677	1386	1110	1414	1146.75	53.1934	3	30	1	11	11.25	0.730314	0.284955	-6.67148	6.96507	-6.77929	2.55835e-22	2.02225e-20	[GO:0042393] histone binding; [PF02182] SAD/SRA domain; [PTHR22884:SF96] HYPOTHETICAL PROTEIN CBG15515; [PTHR22884] SET DOMAIN PROTEINS
Mapoly0033s0104	95	53	48	60	64	2.68844	0	0	0	1	0.25	0	0.0233417	-7.9999	2.15219	-7.91285	2.90872e-22	2.28981e-20
Mapoly0053s0028	73	341	239	308	240.25	11.1613	2	3	1	3	2.25	0.0993726	0.0888712	-6.73846	4.64445	-6.95596	3.67019e-22	2.87752e-20
Mapoly0124s0054	165	273	188	188	203.5	3.46937	8	2	6	12	7	0.0658978	0.147784	-4.86153	5.29078	-5.08536	4.34697e-22	3.39433e-20
Mapoly0056s0129	70	309	301	273	238.25	5.35693	3	2	2	4	2.75	0.044867	0.0625331	-6.43689	4.76374	-6.70602	6.10007e-22	4.74403e-20	[PF03181] BURP domain; [PTHR31458] FAMILY NOT NAMED
Mapoly0046s0016	230	449	341	410	357.5	4.97699	23	7	35	11	19	0.161119	0.260822	-4.23387	6.35561	-4.62138	6.24902e-22	4.84035e-20	[KOG0266] WD40 repeat-containing protein; [GO:0005515] protein binding; [PTHR22850] WD40 REPEAT FAMILY; [PF00400] WD domain, G-beta repeat
Mapoly0015s0149	158	289	198	264	227.25	5.7578	7	13	3	6	7.25	0.227215	0.112457	-4.97015	5.42038	-5.17186	7.43978e-22	5.73964e-20
Mapoly0008s0221	48	61	51	60	55	3.71475	0	0	1	0	0.25	0	0.025284	-7.78126	1.81977	-8.2538	8.63175e-22	6.63269e-20
Mapoly0003s0265	51	105	111	97	91	2.05759	0	0	1	1	0.5	0	0.0201086	-7.50775	2.83583	-7.73942	1.05597e-21	8.08191e-20	[PF07250] Glyoxal oxidase N-terminus; [PF09118] Domain of unknown function (DUF1929); [PTHR32208] FAMILY NOT NAMED
Mapoly0093s0073	41	90	112	107	87.5	8.50151	0	0	0	0	0	0	0	-22.2847	-15.2261	-22.8029	1.13537e-21	8.65527e-20
Mapoly0148s0028	56	181	145	170	138	8.56009	1	2	0	1	1	0.0932965	0.0319624	-7.1085	3.6661	-7.29971	1.28016e-21	9.72067e-20
Mapoly0002s0052	88	225	173	257	185.75	3.25483	1	5	1	3	2.5	0.048666	0.0337684	-6.21528	4.55518	-6.36966	1.39002e-21	1.05134e-19
Mapoly0173s0014	56	72	56	92	69	12.5408	0	1	0	0	0.25	0.0900924	0	-8.10843	2.18656	-8.1895	1.59486e-21	1.20157e-19
Mapoly0008s0083	122	266	204	226	204.5	4.47172	11	9	3	6	7.25	0.181409	0.093234	-4.81797	5.3186	-5.0911	1.79498e-21	1.34707e-19	[KOG0266] WD40 repeat-containing protein; [GO:0005515] protein binding; [PTHR22847] WD40 REPEAT PROTEIN; [PF00400] WD domain, G-beta repeat
Mapoly0029s0139	48	89	50	58	61.25	21.4988	0	0	1	0	0.25	0	0.131618	-7.93654	1.89636	-8.40698	2.11212e-21	1.57893e-19	[PF00168] C2 domain; [GO:0005515] protein binding
Mapoly0178s0002	43	63	66	69	60.25	2.86124	0	0	0	0	0	0	0	-21.7464	-15.2261	-22.2382	2.16758e-21	1.61414e-19	[PF10440] Ubiquitin-binding WIYLD domain; [GO:0018024] histone-lysine N-methyltransferase activity
Mapoly0024s0137	166	213	164	247	197.5	3.55642	7	10	12	13	10.5	0.134526	0.205445	-4.23339	5.56945	-4.45029	2.26611e-21	1.68102e-19
Mapoly0047s0117	1765	3400	2817	3005	2746.75	111.814	753	541	686	465	611.25	21.6568	20.2925	-2.16789	10.3699	-2.47835	2.37385e-21	1.75419e-19	[PTHR11586:SF1] SUBFAMILY NOT NAMED; [KOG2241] tRNA-binding protein; [PF01588] Putative tRNA binding domain; [GO:0000049] tRNA binding; [PTHR11586] FAMILY NOT NAMED
Mapoly0010s0204	57	73	85	88	75.75	2.36087	0	2	0	0	0.5	0.0306947	0	-7.24312	2.75917	-7.33472	2.45158e-21	1.7996e-19
Mapoly0033s0102	352.804	1227.33	905.866	1163.52	912.38	35.6383	62.2897	55.6322	88.2482	79.0909	71.3152	1.48603	2.57611	-3.67735	8.05664	-3.96959	2.45396e-21	1.7996e-19
Mapoly0006s0201	80	351	200	288	229.75	8.99853	6	4	5	2	4.25	0.157823	0.112037	-5.75645	4.98803	-6.12292	2.47705e-21	1.80966e-19
Mapoly0021s0089	101	180	163	187	157.75	5.26442	9	0	1	2	3	0.105841	0.0474028	-5.71653	4.40726	-6.16609	2.92077e-21	2.12577e-19
Mapoly0117s0027	43	99	69	62	68.25	4.94494	0	0	0	0	0	0	0	-21.9263	-15.2261	-22.4138	2.98241e-21	2.16247e-19
Mapoly0099s0046	46	65	106	70	71.75	1.95924	0	0	0	0	0	0	0	-21.9984	-15.2261	-22.5043	3.29696e-21	2.37916e-19
Mapoly0005s0268	1206	1042	673	1192	1028.25	19.8035	156	152	218	228	188.5	2.5869	3.99883	-2.44755	8.8157	-2.65084	3.30594e-21	2.37916e-19
Mapoly0247s0001	62	123	44	60	72.25	1.5029	0	0	0	0	0	0	0	-22.0084	-15.2261	-22.462	3.6149e-21	2.58443e-19	[PF13855] Leucine rich repeat; [GO:0005524] ATP binding; [KOG1187] Serine/threonine protein kinase; [PF00069] Protein kinase domain; [GO:0005515] protein binding; [GO:0004672] protein kinase activity; [PF00560] Leucine Rich Repeat; [PF12819] Carbohydrate-binding protein of the ER; [GO:0006468] protein phosphorylation; [PTHR24420] LEUCINE-RICH REPEAT RECEPTOR-LIKE PROTEIN KINASE
Mapoly0035s0026	83	138	113	150	121	6.27137	0	3	4	4	2.75	0.0765376	0.186061	-5.45942	4.28165	-5.64144	3.61796e-21	2.58443e-19
Mapoly0173s0029	38	121	83	89	82.75	76.4834	0	0	0	0	0	0	0	-22.2042	-15.2261	-22.7086	4.25446e-21	3.02789e-19	[GO:0006355] regulation of transcription, DNA-dependent; [PF02671] Paired amphipathic helix repeat; [GO:0005634] nucleus
Mapoly0138s0014	69	85	87	70	77.75	11.78	0	3	2	0	1.25	0.226671	0.113476	-5.95882	3.35675	-6.17926	4.33525e-21	3.07405e-19
Mapoly0174s0015	79	340	297	322	259.5	3.40136	3	3	5	6	4.25	0.0324905	0.0642144	-5.93212	5.1374	-6.20075	4.37133e-21	3.08827e-19
Mapoly0207s0003	224	369	332	268	298.25	13.9392	0	14	10	2	6.5	0.317378	0.243641	-5.51993	5.52811	-5.73489	4.64067e-21	3.26659e-19	[GO:0016758] transferase activity, transferring hexosyl groups; [PF00201] UDP-glucoronosyl and UDP-glucosyl transferase; [PTHR11926] GLUCOSYL/GLUCURONOSYL TRANSFERASES; [GO:0008152] metabolic process; [KOG1192] UDP-glucuronosyl and UDP-glucosyl transferase
Mapoly0051s0084	36	110	121	105	93	6.55066	0	0	0	0	0	0	0	-22.3727	-15.2261	-22.8946	4.97924e-21	3.49217e-19
Mapoly0069s0058	42	112	101	122	94.25	10.7867	0	1	0	0	0.25	0.0554336	0	-8.55832	2.42873	-8.67385	5.10475e-21	3.56722e-19
Mapoly0006s0202	52	123	109	124	102	4.36408	0	1	3	0	1	0.0208252	0.0469146	-6.6724	3.33805	-7.06927	6.64532e-21	4.62702e-19
Mapoly0064s0036	42	114	114	105	93.75	2.74746	0	0	2	0	0.5	0	0.0213296	-7.5507	2.72538	-8.06502	7.40036e-21	5.1158e-19
Mapoly0250s0003	39	118	70	84	77.75	5.31214	0	0	0	0	0	0	0	-22.1143	-15.2261	-22.612	7.52867e-21	5.18591e-19
Mapoly0019s0167	38	114	123	76	87.75	2.83888	0	0	0	0	0	0	0	-22.2888	-15.2261	-22.8034	9.666e-21	6.63445e-19
Mapoly0149s0007	126	125	130	148	132.25	9.19359	8	5	13	3	7.25	0.373145	0.450649	-4.18914	4.93874	-4.54168	1.15446e-20	7.8958e-19	[PF13516] Leucine Rich repeat; [PTHR24106] FAMILY NOT NAMED; [KOG1909] Ran GTPase-activating protein
Mapoly0042s0062	173	438	417	391	354.75	15.2394	2	12	11	14	9.75	0.280643	0.486076	-5.18525	5.98383	-5.37835	1.20357e-20	8.20258e-19
Mapoly0001s0401	726	1208	878	907	929.75	43.0327	260	92	218	128	174.5	6.41754	6.92828	-2.41362	8.65373	-2.7521	1.2433e-20	8.44348e-19
Mapoly0051s0109	116	211	201	179	176.75	6.70641	14	5	12	4	8.75	0.280861	0.248095	-4.33628	5.28819	-4.72736	1.41849e-20	9.59942e-19
Mapoly0007s0286	163	346	308	295	278	5.44821	1	12	1	3	4.25	0.122076	0.038085	-6.03147	5.23226	-6.1567	1.43339e-20	9.66633e-19
Mapoly0010s0071	64	119	89	103	93.75	23.6339	3	3	3	1	2.5	0.641402	0.413714	-5.22881	3.95618	-5.54926	1.46461e-20	9.84251e-19
Mapoly0019s0141	40	59	69	83	62.75	3.13973	0	0	0	0	0	0	0	-21.8051	-15.2261	-22.3077	1.57772e-20	1.05431e-18
Mapoly0004s0148	1283	1710	1338	1740	1517.75	28.0917	503	429	378	318	407	7.28154	5.75686	-1.89883	9.64934	-2.17132	1.5798e-20	1.05431e-18	[GO:0016567] protein ubiquitination; [PF00514] Armadillo/beta-catenin-like repeat; [GO:0005515] protein binding; [GO:0004842] ubiquitin-protein ligase activity; [KOG4224] Armadillo repeat protein VAC8 required for vacuole fusion, inheritance and cytosol-to-vacuole protein targeting; [PTHR23315] BETA CATENIN-RELATED ARMADILLO REPEAT-CONTAINING; [PF04564] U-box domain
Mapoly0101s0024	47	118	96	108	92.25	2.04934	0	0	0	2	0.5	0	0.0232284	-7.52743	2.96058	-7.52964	1.64011e-20	1.09079e-18
Mapoly0006s0014	45	237	158	188	157	16.9054	0	2	0	0	0.5	0.103908	0	-8.29457	3.2998	-8.41597	1.68194e-20	1.11476e-18
Mapoly0003s0194	37	168	140	142	121.75	4.24835	1	0	0	0	0.25	0.0120711	0	-8.92768	2.38211	-9.5238	1.76802e-20	1.1678e-18	[PF02301] HORMA domain; [PTHR21518:SF0] SUBFAMILY NOT NAMED; [KOG4652] HORMA domain; [PTHR21518] MEIOSIS SPECIFIC PROTEIN HOP1
Mapoly2273s0001	43	138	63	69	78.25	5.30756	0	0	0	0	0	0	0	-22.1235	-15.2261	-22.6084	2.17573e-20	1.4322e-18	[GO:0006355] regulation of transcription, DNA-dependent; [PF00382] Transcription factor TFIIB repeat; [GO:0006352] DNA-dependent transcription, initiation; [PTHR11618] TRANSCRIPTION INITIATION FACTOR IIB-RELATED; [GO:0008270] zinc ion binding; [KOG1597] Transcription initiation factor TFIIB; [PF08271] TFIIB zinc-binding; [GO:0017025] TBP-class protein binding
Mapoly0199s0010	13292	32937	25678	32922	26207.2	1267.63	664	2237	1094	1730	1431.25	63.9675	63.0865	-4.19462	12.684	-4.38425	2.57127e-20	1.6868e-18	[PF00188] Cysteine-rich secretory protein family; [PTHR10334] CYSTEINE-RICH SECRETORY PROTEIN-RELATED
Mapoly0032s0078	11818	44313	28525	38059	30678.8	1735.02	268	1335	511	975	772.25	41.9153	39.2181	-5.31203	12.3673	-5.48471	2.68619e-20	1.75622e-18	[PF13385] Concanavalin A-like lectin/glucanases superfamily
Mapoly0100s0031	898	671	562	630	690.25	15.369	124	152	168	133	144.25	2.76575	2.84876	-2.25855	8.3231	-2.46385	2.89069e-20	1.88354e-18	[PF00817] impB/mucB/samB family; [2.7.7.7] DNA-directed DNA polymerase.; [GO:0006281] DNA repair; [PF11799] impB/mucB/samB family C-terminal domain; [PTHR11076] DNA REPAIR POLYMERASE UMUC / TRANSFERASE FAMILY MEMBER; [GO:0003887] DNA-directed DNA polymerase activity; [GO:0003684] damaged DNA binding; [KOG2095] DNA polymerase iota/DNA damage inducible protein; [K03509] DNA polymerase eta subunit […
Mapoly0067s0094	38	64	54	73	57.25	2.16496	0	0	0	0	0	0	0	-21.6727	-15.2261	-22.1663	3.15457e-20	2.04856e-18
Mapoly0152s0008	43	91	110	75	79.75	6.61349	0	0	2	0	0.5	0	0.0615546	-7.31736	2.60581	-7.82588	3.24096e-20	2.0976e-18
Mapoly0151s0014	50	81	82	79	73	5.25237	3	0	0	0	0.75	0.0762399	0	-6.60483	2.79041	-7.17049	3.30818e-20	2.13395e-18
Mapoly0168s0017	80	126	81	128	103.75	3.16115	0	4	1	3	2	0.0604767	0.0599906	-5.69696	3.97858	-5.77984	3.33846e-20	2.14629e-18
Mapoly0081s0046	32	119	97	103	87.75	8.43391	0	0	0	0	0	0	0	-22.2888	-15.2261	-22.8065	3.86292e-20	2.47522e-18
Mapoly0144s0023	53	89	71	74	71.75	4.59212	1	0	0	2	0.75	0.0227658	0.0679663	-6.57991	2.97678	-6.72725	3.876e-20	2.47538e-18	[GO:0005506] iron ion binding; [GO:0055114] oxidation-reduction process; [GO:0016705] oxidoreductase activity, acting on paired donors, with incorporation or reduction of molecular oxygen; [PTHR24296] FAMILY NOT NAMED; [GO:0020037] heme binding; [PF00067] Cytochrome P450
Mapoly0002s0226	318	806	698	995	704.25	27.2328	12	41	54	17	31	0.928985	1.10046	-4.50575	7.26287	-4.80896	4.14229e-20	2.63671e-18
Mapoly0088s0074	198	443	331	388	340	8.52582	24	30	25	22	25.25	0.579202	0.533188	-3.75118	6.59052	-4.01654	4.99715e-20	3.1704e-18	[PF07910] Peptidase family C78; [PTHR13226] FAMILY NOT NAMED; [PTHR13226:SF14] SUBFAMILY NOT NAMED
Mapoly0046s0021	34	89	87	72	70.5	8.16403	0	0	0	0	0	0	0	-21.9731	-15.2261	-22.4826	5.04142e-20	3.188e-18
Mapoly0082s0011	58	106	87	122	93.25	4.91898	2	2	3	1	2	0.0888252	0.0859404	-5.54302	3.79442	-5.87742	5.5176e-20	3.47771e-18
Mapoly0083s0087	32	115	100	86	83.25	4.04125	0	0	0	0	0	0	0	-22.2129	-15.2261	-22.7285	5.57678e-20	3.50356e-18
Mapoly0001s0145	61	103	113	101	94.5	1.49466	3	3	1	2	2.25	0.039955	0.0224423	-5.39231	3.92889	-5.64854	6.05604e-20	3.7923e-18
Mapoly0064s0018	264	426	310	411	352.75	3.42576	37	39	21	15	28	0.31541	0.153206	-3.65515	6.66989	-3.93469	6.87539e-20	4.29145e-18	[GO:0070188] Stn1-Ten1 complex; [GO:0003697] single-stranded DNA binding; [PF15490] Telomere-capping, CST complex subunit
Mapoly0114s0003	1162	1922	1557	1578	1554.75	25.5416	526	352	517	276	417.75	13.0792	12.307	-1.89597	9.67041	-2.21374	6.97366e-20	4.33874e-18	[PTHR13379] UNCHARACTERIZED DUF1308; [PF07000] Protein of unknown function (DUF1308); [KOG4529] Uncharacterized conserved protein
Mapoly0023s0181	38	54	65	50	51.75	2.52137	0	0	0	0	0	0	0	-21.527	-15.2261	-22.0178	7.3033e-20	4.52922e-18	[PF08513] LisH
Mapoly0053s0092	74	48	39	39	50	2.2861	0	0	0	1	0.25	0	0.0254763	-7.64376	1.97236	-7.5532	8.90079e-20	5.50223e-18
Mapoly0034s0124	90	105	130	126	112.75	2.27194	7	3	1	5	4	0.0798602	0.0608015	-4.81698	4.45724	-5.07927	9.18013e-20	5.65678e-18	[GO:0005524] ATP binding; [KOG1187] Serine/threonine protein kinase; [PF00069] Protein kinase domain; [GO:0004672] protein kinase activity; [GO:0006468] protein phosphorylation; [PF00139] Legume lectin domain; [GO:0030246] carbohydrate binding; [PTHR24420] LEUCINE-RICH REPEAT RECEPTOR-LIKE PROTEIN KINASE
Mapoly0129s0053	42	43	49	40	43.5	5.40022	1	0	0	0	0.25	0.0446156	0	-7.44285	1.61198	-7.98355	9.67958e-20	5.94554e-18
Mapoly0099s0040	38	90	89	76	73.25	3.45245	0	0	0	1	0.25	0	0.0246216	-8.19466	2.2951	-8.19867	1.02848e-19	6.29726e-18
Mapoly0064s0020	50	71	62	63	61.5	1.64221	1	0	2	1	1	0.0100164	0.0358961	-5.94249	2.96648	-6.29332	1.05213e-19	6.42168e-18
Mapoly0068s0049	60	113	103	108	96	4.52706	3	1	4	3	2.75	0.0729623	0.143855	-5.12552	4.05112	-5.44676	1.10448e-19	6.71992e-18
Mapoly0022s0142	350	433	478	374	408.75	10.1501	44	45	66	52	51.75	0.945721	1.30019	-2.98159	7.22509	-3.24035	1.45151e-19	8.80355e-18	[PTHR31867] FAMILY NOT NAMED; [PF03330] Rare lipoprotein A (RlpA)-like double-psi beta-barrel; [PF01357] Pollen allergen
Mapoly0002s0280	89	221	223	215	187	3.46571	10	0	2	3	3.75	0.0646887	0.0424868	-5.64	4.71158	-6.08104	1.74459e-19	1.05479e-17
Mapoly0038s0089	57	132	123	116	107	4.75196	2	3	2	3	2.5	0.0961066	0.102217	-5.41953	4.11498	-5.64832	1.7842e-19	1.07537e-17
Mapoly0032s0084	52	111	89	114	91.5	4.93745	0	3	1	0	1	0.0791474	0.0198113	-6.51568	3.35557	-6.70727	1.89843e-19	1.14066e-17
Mapoly0185s0003	99	180	122	179	145	2.86438	1	8	4	1	3.5	0.0849653	0.0397231	-5.37255	4.56664	-5.58686	1.99426e-19	1.19451e-17
Mapoly0173s0028	38	46	42	45	42.75	3.86199	0	0	0	0	0	0	0	-21.2514	-15.2261	-21.7235	2.1462e-19	1.28154e-17	[GO:0006355] regulation of transcription, DNA-dependent; [PF02671] Paired amphipathic helix repeat; [GO:0005634] nucleus
Mapoly0101s0007	31	108	69	108	79	2.84798	1	0	0	0	0.25	0.012551	0	-8.30368	2.06496	-8.8895	2.36817e-19	1.40972e-17
Mapoly0198s0013	246	458	476	407	396.75	28.9989	45	21	46	39	37.75	1.90929	2.73411	-3.39368	6.97033	-3.70668	3.02936e-19	1.79776e-17
Mapoly0007s0199	110	214	147	186	164.25	7.01712	8	10	13	7	9.5	0.33201	0.364087	-4.11182	5.34128	-4.39693	3.23954e-19	1.9166e-17	[PTHR14991] FAMILY NOT NAMED; [GO:0005515] protein binding; [PF13639] Ring finger domain; [GO:0008270] zinc ion binding; [KOG0320] Predicted E3 ubiquitin ligase; [PTHR14991:SF0] SUBFAMILY NOT NAMED
Mapoly0091s0045	67	83	101	97	87	4.44886	0	0	2	4	1.5	0	0.145967	-5.85796	3.62841	-5.9933	3.72536e-19	2.19728e-17
Mapoly0005s0138	1166	1390	981	1267	1201	15.3005	296	356	425	274	337.75	3.64193	3.92581	-1.83021	9.34348	-2.07893	3.96083e-19	2.32904e-17
Mapoly0002s0339	63	227	165	198	163.25	12.8786	0	1	1	5	1.75	0.038227	0.233661	-6.54357	4.24193	-6.63163	4.88956e-19	2.86641e-17
Mapoly0048s0010	33	51	60	56	50	1.39054	0	0	0	0	0	0	0	-21.4774	-15.2261	-21.9761	5.1191e-19	2.99188e-17
Mapoly0039s0041	40	39	57	40	44	2.03829	0	0	0	0	0	0	0	-21.2929	-15.2261	-21.771	5.40026e-19	3.14667e-17
Mapoly0068s0056	198	382	331	389	325	18.7541	40	22	41	23	31.5	1.43417	1.56751	-3.36702	6.6819	-3.70642	5.63017e-19	3.27075e-17	[PTHR21461:SF3] gb def: Hypothetical protein M03F8.4; [PF01697] Glycosyltransferase family 92; [PTHR21461] UNCHARACTERIZED
Mapoly0029s0101	33	72	68	47	55	7.74308	0	0	0	0	0	0	0	-21.6149	-15.2261	-22.1112	5.80939e-19	3.36474e-17
Mapoly0008s0183	70	71	63	47	62.75	4.90486	2	3	1	0	1.5	0.17603	0.0297937	-5.38656	3.29101	-5.64097	7.58016e-19	4.3772e-17
Mapoly0094s0057	92	189	157	134	143	3.126	11	7	7	2	6.75	0.160475	0.0797008	-4.40498	4.96002	-4.76671	8.07669e-19	4.65e-17
Mapoly0066s0104	29	71	72	79	62.75	5.2229	0	0	0	0	0	0	0	-21.8051	-15.2261	-22.32	8.30316e-19	4.76616e-17
Mapoly0143s0012	36	55	67	39	49.25	1.30001	0	0	0	0	0	0	0	-21.4556	-15.2261	-21.9453	8.54504e-19	4.89045e-17
Mapoly0116s0008	39	75	67	46	56.75	1.40912	0	1	0	0	0.25	0.0122684	0	-7.82645	2.04898	-7.91434	8.93976e-19	5.10122e-17	[GO:0055114] oxidation-reduction process; [PF00141] Peroxidase; [GO:0020037] heme binding; [PTHR31235] FAMILY NOT NAMED; [GO:0006979] response to oxidative stress; [GO:0004601] peroxidase activity
Mapoly0013s0155	57	430	359	409	313.75	23.1805	6	4	6	6	5.5	0.293115	0.385855	-5.83404	5.44314	-6.15776	9.09427e-19	5.17408e-17	[GO:0008270] zinc ion binding; [PF07496] CW-type Zinc Finger
Mapoly0022s0089	54	121	102	104	95.25	6.63457	3	3	4	2	3	0.175734	0.175504	-4.98868	4.11457	-5.30335	9.13891e-19	5.18418e-17	[PF10890] Protein of unknown function (DUF2741); [GO:0022900] electron transport chain; [GO:0005743] mitochondrial inner membrane; [GO:0070469] respiratory chain
Mapoly0134s0017	35	66	39	71	52.75	1.00216	0	0	0	0	0	0	0	-21.5546	-15.2261	-22.0429	9.46064e-19	5.35095e-17
Mapoly0015s0168	25	119	105	137	96.5	19.2263	0	0	0	0	0	0	0	-22.426	-15.2261	-22.9577	9.55202e-19	5.38684e-17
Mapoly0012s0192	36	52	36	41	41.25	1.56417	0	0	0	0	0	0	0	-21.1998	-15.2261	-21.6673	9.97357e-19	5.60817e-17
Mapoly0075s0074	351	315	200	306	293	11.0337	50	34	49	31	41	1.34362	1.34592	-2.8372	6.77607	-3.09892	1.13249e-18	6.34949e-17
Mapoly0001s0173	30	125	134	102	97.75	5.72011	0	1	0	0	0.25	0.028112	0	-8.61093	2.4616	-8.73959	1.18815e-18	6.64227e-17
Mapoly0076s0052	42	50	42	41	43.75	6.801	0	1	0	0	0.25	0.078042	0	-7.45111	1.84926	-7.5149	1.19256e-18	6.64768e-17
Mapoly0004s0147	50	213	112	160	133.75	10.9444	0	3	2	1	1.5	0.119427	0.102475	-6.47842	3.91965	-6.68919	1.24588e-18	6.92485e-17
Mapoly0365s0002	75	200	137	151	140.75	10.1221	1	0	2	6	2.25	0.0253127	0.279631	-5.96706	4.2692	-6.11731	1.285e-18	7.12178e-17	[KOG0841] Multifunctional chaperone (14-3-3 family); [PF00244] 14-3-3 protein; [GO:0019904] protein domain specific binding; [PTHR18860] 14-3-3 PROTEIN
Mapoly0011s0119	34	86	72	64	64	3.6141	0	0	0	1	0.25	0	0.0296069	-7.9999	2.19507	-7.99861	1.31382e-18	7.26065e-17
Mapoly0167s0018	31	110	96	83	80	9.70102	0	0	1	0	0.25	0	0.0440993	-8.32183	2.11159	-8.83743	1.42405e-18	7.84736e-17
Mapoly0535s0002	40	47	45	29	40.25	8.19958	0	0	0	0	0	0	0	-21.1644	-15.2261	-21.6239	1.58012e-18	8.68257e-17	[PF03330] Rare lipoprotein A (RlpA)-like double-psi beta-barrel; [GO:0008061] chitin binding; [PTHR22595] CHITINASE-RELATED; [PF00187] Chitin recognition protein
Mapoly0026s0014	316	446	526	417	426.25	14.2633	32	41	9	11	23.25	1.0553	0.305994	-4.1964	6.69019	-4.45626	1.75023e-18	9.58997e-17	[PF14686] Polysaccharide lyase family 4, domain II; [PTHR32018] FAMILY NOT NAMED; [PF14683] Polysaccharide lyase family 4, domain III; [PF06045] Rhamnogalacturonate lyase family
Mapoly0173s0011	341	477	291	354	365.75	8.46748	41	58	40	30	42.25	1.01849	0.724466	-3.11383	6.9945	-3.34494	1.90782e-18	1.04238e-16	[PF00183] Hsp90 protein; [GO:0005524] ATP binding; [GO:0006950] response to stress; [KOG0020] Endoplasmic reticulum glucose-regulated protein (GRP94/endoplasmin), HSP90 family; [PF02518] Histidine kinase-, DNA gyrase B-, and HSP90-like ATPase; [GO:0006457] protein folding; [K04079] molecular chaperone HtpG; [PTHR11528] HEAT SHOCK PROTEIN 90; [GO:0051082] unfolded protein binding
Mapoly0026s0129	166	275	225	263	232.25	15.6908	16	2	10	17	11.25	0.450078	0.858503	-4.36768	5.71536	-4.64736	2.11298e-18	1.15122e-16
Mapoly0099s0007	40	43	38	29	37.5	2.08527	0	0	0	0	0	0	0	-21.0623	-15.2261	-21.5141	2.20844e-18	1.19984e-16
Mapoly0163s0009	46	90	100	114	87.5	3.28745	1	1	3	2	1.75	0.0313303	0.0801768	-5.64384	3.68353	-5.94423	2.55465e-18	1.38403e-16	[GO:0005524] ATP binding; [KOG1187] Serine/threonine protein kinase; [PF00069] Protein kinase domain; [GO:0004672] protein kinase activity; [GO:0006468] protein phosphorylation; [PF00139] Legume lectin domain; [GO:0030246] carbohydrate binding; [PTHR24420] LEUCINE-RICH REPEAT RECEPTOR-LIKE PROTEIN KINASE
Mapoly0002s0271	2808	4645	3919	3765	3784.25	70.6954	1082	1054	1093	940	1042.25	16.9376	16.9143	-1.86031	10.9982	-2.12692	2.58056e-18	1.39415e-16
Mapoly0123s0016	29	141	90	125	96.25	3.44423	0	1	0	0	0.25	0.0172685	0	-8.58862	2.44653	-8.70945	2.65017e-18	1.42776e-16
Mapoly0129s0037	523.508	1012.79	748.276	928.773	803.337	14.026	96.9255	121.705	132.252	143.285	123.542	1.64485	2.17463	-2.701	8.3628	-2.94084	2.66033e-18	1.42924e-16
Mapoly0051s0080	32	93	73	90	72	1.31628	0	0	2	0	0.5	0	0.0133298	-7.16988	2.53335	-7.68095	2.86147e-18	1.53303e-16
Mapoly0001s0063	466	901	670	799	709	18.4968	151	96	165	117	132.25	2.62812	3.20513	-2.42252	8.2881	-2.72823	2.89026e-18	1.54417e-16	[PTHR11635] CAMP-DEPENDENT PROTEIN KINASE REGULATORY CHAIN; [PF00027] Cyclic nucleotide-binding domain
Mapoly0001s0299	30	110	121	85	86.5	7.6091	0	1	0	0	0.25	0.0423679	0	-8.43453	2.37162	-8.55963	2.9313e-18	1.56177e-16
Mapoly0134s0041	1326	1701	1452	1625	1526	36.7014	83	182	35	25	81.25	2.89644	0.636415	-4.23124	8.51947	-4.44354	3.17917e-18	1.68916e-16	[PF00022] Actin; [K10355] actin, other eukaryote; [PTHR11937] ACTIN; [KOG0676] Actin and related proteins
Mapoly0245s0005	141	633	416	475	416.25	27.8493	3	16	2	7	7	0.591104	0.293263	-5.89395	5.88321	-6.05137	3.48001e-18	1.84393e-16
Mapoly0011s0133	40	174	161	200	143.75	8.64241	2	1	3	2	2	0.0701633	0.12662	-6.16741	4.13123	-6.51947	3.5402e-18	1.87068e-16
Mapoly0169s0019	112	177	175	141	151.25	10.1778	12	10	16	6	11	0.619333	0.613627	-3.78136	5.36492	-4.1089	3.66028e-18	1.92885e-16
Mapoly0035s0024	134	313	254	274	243.75	3.48275	14	12	18	20	16	0.154108	0.24428	-3.92926	6.0269	-4.19217	3.92384e-18	2.0621e-16
Mapoly0103s0068	544.887	875.943	649.967	773.161	710.99	19.5724	162.818	100.549	170.425	148.76	145.638	2.75099	3.63613	-2.28744	8.362	-2.56816	4.23851e-18	2.22142e-16	[KOG2250] Glutamate/leucine/phenylalanine/valine dehydrogenases; [1.4.1.3] Glutamate dehydrogenase (NAD(P)(+)).; [GO:0055114] oxidation-reduction process; [PTHR11606] GLUTAMATE DEHYDROGENASE; [PTHR11606:SF2] GLUTAMATE DEHYDROGENASE; [K00261] glutamate dehydrogenase (NAD(P)+) [EC:1.4.1.3]; [GO:0016491] oxidoreductase activity; [PF00208] Glutamate/Leucine/Phenylalanine/Valine dehydrogenase; [GO:000…
Mapoly0076s0003	8446	9667	7772	8588	8618.25	732.641	595	1545	707	1330	1044.25	84.2696	83.614	-3.04493	11.6313	-3.19118	4.63571e-18	2.42301e-16	[KOG0710] Molecular chaperone (small heat-shock protein Hsp26/Hsp42); [PTHR11527] SMALL HEAT-SHOCK PROTEIN (HSP20) FAMILY; [PF00011] Hsp20/alpha crystallin family
Mapoly0018s0027	50	82	74	62	67	5.17262	1	1	3	2	1.75	0.0656874	0.168099	-5.25872	3.47676	-5.53068	4.66334e-18	2.43086e-16
Mapoly0455s0001	63	171	128	125	121.75	7.66221	3	1	6	5	3.75	0.0971346	0.303778	-5.02088	4.46158	-5.31929	4.75744e-18	2.47323e-16	[PF13962] Domain of unknown function
Mapoly0055s0089	41	89	90	65	71.25	5.71373	0	0	1	2	0.75	0	0.113617	-6.56982	2.99013	-6.71674	5.52204e-18	2.85532e-16	[PTHR11746] O-METHYLTRANSFERASE; [GO:0008171] O-methyltransferase activity; [PF00891] O-methyltransferase
Mapoly0021s0039	63	228	183	176	162.5	5.38732	5	0	6	4	3.75	0.0577123	0.141314	-5.4374	4.64091	-5.82084	5.59809e-18	2.88691e-16
Mapoly0051s0090	28	50	55	50	45.75	2.63065	0	0	1	0	0.25	0	0.0211101	-7.5156	1.70141	-8.01707	5.68663e-18	2.92475e-16
Mapoly0093s0074	77	263	204	194	184.5	7.81998	11	8	7	6	8	0.327518	0.240777	-4.52747	5.30692	-4.84763	6.47367e-18	3.32068e-16
Mapoly0207s0013	60	229	175	164	157	8.78625	0	3	6	0	2.25	0.0814414	0.122313	-6.12468	4.25443	-6.4921	6.49851e-18	3.32458e-16	[PF06330] Trichodiene synthase (TRI5); [GO:0045482] trichodiene synthase activity; [GO:0016106] sesquiterpenoid biosynthetic process
Mapoly0014s0087	58	112	108	122	100	2.3654	2	2	7	2	3.25	0.0396869	0.0854675	-4.94341	4.18892	-5.30154	6.6063e-18	3.37079e-16
Mapoly0039s0065	33	68	53	68	55.5	1.57599	0	0	2	0	0.5	0	0.020896	-6.79437	2.33883	-7.29191	6.8401e-18	3.48087e-16
Mapoly0013s0205	26	159	107	122	103.5	6.66873	0	0	0	1	0.25	0	0.0332721	-8.69339	2.55267	-8.71381	7.09042e-18	3.59876e-16
Mapoly0028s0011	907	771	835	623	784	53.1396	268	92	224	160	186	9.78346	11.6836	-2.07555	8.56987	-2.37097	7.96379e-18	4.03144e-16	[PF04248] Domain of unknown function (DUF427)
Mapoly0136s0016	43	61	53	62	54.75	4.5627	1	0	0	2	0.75	0.0296584	0.0885441	-6.18979	2.78117	-6.33603	8.42537e-18	4.25393e-16
Mapoly0304s0001	29	61	39	46	43.75	1.86281	0	0	0	0	0	0	0	-21.2847	-15.2261	-21.7698	9.25811e-18	4.66217e-16	[PTHR32133] FAMILY NOT NAMED; [PF12937] F-box-like; [GO:0005515] protein binding
Mapoly0028s0043	88	69	30	53	60	3.8793	3	0	2	0	1.25	0.0726991	0.0506639	-5.58494	2.9885	-6.03371	9.50666e-18	4.77487e-16	[PTHR12864] RAN BINDING PROTEIN 9-RELATED; [PF10607] CTLH/CRA C-terminal to LisH motif domain; [KOG2659] LisH motif-containing protein; [PF08513] LisH
Mapoly0046s0062	73	72	39	56	60	5.08677	2	1	1	3	1.75	0.105885	0.17242	-5.09952	3.40351	-5.25607	9.80645e-18	4.91265e-16
Mapoly0157s0013	42	62	58	64	56.5	6.78809	3	1	0	0	1	0.187138	0	-5.82015	2.87655	-6.24645	9.86476e-18	4.92906e-16
Mapoly0096s0046	220	430	426	423	374.75	13.0584	52	41	45	36	43.5	1.33429	1.23281	-3.10684	7.03887	-3.41122	1.10651e-17	5.51451e-16
Mapoly0028s0082	278	933	796	793	700	16.313	85	46	38	12	45.25	1.2081	0.467204	-3.95136	7.48529	-4.34832	1.13093e-17	5.62174e-16
Mapoly0067s0107	127	236	149	238	187.5	25.0452	5	12	0	3	5	1.02755	0.212006	-5.22881	5.02869	-5.40385	1.20492e-17	5.97411e-16
Mapoly0068s0101	46	117	95	114	93	5.78128	2	0	4	2	2	0.0434796	0.155806	-5.53915	3.77945	-5.91925	1.21486e-17	6.00796e-16
Mapoly0042s0012	32.8527	53.8278	31.149	63.9004	45.4325	6.20719	0	0	0	0	0	0	0	-21.3392	-15.2261	-21.823	1.22637e-17	6.04937e-16
Mapoly0132s0005	35	46	30	31	35.5	2.57984	0	0	0	0	0	0	0	-20.9833	-15.2261	-21.4377	1.23828e-17	6.09252e-16
Mapoly0044s0044	61	63	27	50	50.25	1.69822	1	0	0	1	0.5	0.0124593	0.0185984	-6.651	2.355	-6.83701	1.2922e-17	6.34165e-16
Mapoly0027s0030	28	44	57	45	43.5	2.3126	0	0	0	0	0	0	0	-21.2765	-15.2261	-21.7778	1.64689e-17	8.0618e-16	[GO:0005524] ATP binding; [KOG1187] Serine/threonine protein kinase; [PF00069] Protein kinase domain; [GO:0004672] protein kinase activity; [GO:0006468] protein phosphorylation; [PTHR24420] LEUCINE-RICH REPEAT RECEPTOR-LIKE PROTEIN KINASE
Mapoly0035s0017	35	129	106	161	107.75	11.1313	0	1	3	1	1.25	0.0594091	0.140238	-6.4296	3.59139	-6.75714	1.73192e-17	8.45658e-16
Mapoly0007s0223	49	78	72	48	61.75	4.3163	3	0	0	2	1.25	0.0748999	0.0745369	-5.62642	3.15962	-5.9183	1.85514e-17	9.03539e-16
Mapoly0047s0114	22	91	82	123	79.5	6.75317	0	0	0	0	0	0	0	-22.1464	-15.2261	-22.6786	1.88354e-17	9.15059e-16
Mapoly0053s0001	45	153	131	151	120	14.9909	0	0	1	4	1.25	0	0.309682	-6.58494	3.77446	-6.68858	1.9197e-17	9.30285e-16
Mapoly0127s0025	28	68	37	58	47.75	5.63384	0	0	0	0	0	0	0	-21.4109	-15.2261	-21.9021	1.9948e-17	9.64253e-16
Mapoly0014s0038	34	49	38	52	43.25	2.3648	0	1	0	0	0.25	0.0271058	0	-7.43453	1.84979	-7.51596	2.08025e-17	1.0018e-15
Mapoly0068s0005	301.02	503.703	419.486	450.886	418.774	21.0673	36.1562	52.0068	18.5412	39.1839	36.472	1.93806	1.3903	-3.52131	7.02471	-3.72814	2.08286e-17	1.0018e-15
Mapoly0016s0121	214	706	569	605	523.5	26.7053	11	37	10	21	19.75	1.11053	0.74266	-4.72826	6.7803	-4.91604	2.10916e-17	1.0105e-15
Mapoly0055s0023	863	1548	1257	1494	1290.5	32.1396	446	316	275	206	310.75	8.09211	5.42721	-2.0541	9.33471	-2.36551	2.11142e-17	1.0105e-15
Mapoly0062s0070	45	93	93	92	80.75	11.9277	1	4	1	0	1.5	0.339907	0.0540964	-5.75041	3.53947	-5.98718	2.26818e-17	1.08283e-15
Mapoly0065s0092	1505	2058	1524	1887	1743.5	41.2006	601	599	582	450	558	12.1552	10.8444	-1.64365	9.97904	-1.90496	2.30589e-17	1.09812e-15	[PTHR24012] FAMILY NOT NAMED; [PF14259] RNA recognition motif (a.k.a. RRM, RBD, or RNP domain); [GO:0003676] nucleic acid binding; [PF00076] RNA recognition motif. (a.k.a. RRM, RBD, or RNP domain)
Mapoly0089s0044	587	1006	825	800	804.5	36.5916	241	147	201	179	192	7.20634	7.71862	-2.06699	8.64933	-2.35796	2.36456e-17	1.12328e-15	[PF00929] Exonuclease; [KOG3242] Oligoribonuclease (3'-5' exoribonuclease); [PTHR11046] OLIGORIBONUCLEASE, MITOCHONDRIAL; [3.1.-.-] Acting on ester bonds.; [K13288] oligoribonuclease [EC:3.1.-.-]
Mapoly0032s0063	36	164	111	140	112.75	6.19966	1	2	0	2	1.25	0.0721985	0.0569602	-6.49504	3.70214	-6.65246	2.88583e-17	1.36754e-15	[KOG4172] Predicted E3 ubiquitin ligase; [PF13920] Zinc finger, C3HC4 type (RING finger)
Mapoly0095s0035	23	85	62	61	57.75	3.2295	0	0	0	0	0	0	0	-21.6853	-15.2261	-22.196	3.08023e-17	1.45609e-15	[GO:0005506] iron ion binding; [KOG0156] Cytochrome P450 CYP2 subfamily; [GO:0055114] oxidation-reduction process; [GO:0016705] oxidoreductase activity, acting on paired donors, with incorporation or reduction of molecular oxygen; [GO:0020037] heme binding; [PTHR24298] FAMILY NOT NAMED; [PF00067] Cytochrome P450
Mapoly0095s0066	50	106	75	89	80	6.05762	1	3	1	3	2	0.138569	0.147867	-5.32192	3.77173	-5.46873	3.13492e-17	1.47832e-15
Mapoly0055s0079	94	406	334	325	289.75	8.33604	5	13	15	10	10.75	0.230308	0.305199	-4.7524	5.8797	-5.02508	3.33351e-17	1.56813e-15
Mapoly0143s0031	26	76	40	66	52	5.90754	0	0	0	0	0	0	0	-21.534	-15.2261	-22.0327	3.82426e-17	1.79461e-15
Mapoly0125s0025	1519	1297	1176	990	1245.5	59.5584	673	334	435	264	426.5	19.9541	14.8839	-1.54611	9.49526	-1.8373	3.8869e-17	1.81958e-15	[PF12680] SnoaL-like domain
Mapoly0138s0003	25	100	82	89	74	1.82703	0	0	0	1	0.25	0	0.0127725	-8.20935	2.30931	-8.2271	4.05503e-17	1.89369e-15
Mapoly0035s0135	1519	4398	3091	4258	3316.5	87.6402	675	612	663	495	611.25	14.0986	13.2216	-2.43983	10.5236	-2.74553	4.73719e-17	2.20691e-15	[PF13833] EF-hand domain pair
Mapoly0019s0186	48	129	111	89	94.25	8.34481	1	2	0	4	1.75	0.11755	0.185479	-5.75105	3.82895	-5.85133	5.02249e-17	2.33419e-15
Mapoly0032s0076	468	189	383	170	302.5	15.9018	16	33	19	14	20.5	1.21065	0.796689	-3.88324	6.327	-4.05169	5.22845e-17	2.42407e-15	[PF00190] Cupin; [GO:0045735] nutrient reservoir activity; [PTHR31238] FAMILY NOT NAMED
Mapoly0243s0003	25	45	48	45	40.75	2.53871	0	0	0	0	0	0	0	-21.1822	-15.2261	-21.683	5.29023e-17	2.44683e-15	[GO:0055114] oxidation-reduction process; [K00430] peroxidase [EC:1.11.1.7]; [PF00141] Peroxidase; [GO:0020037] heme binding; [PTHR31235] FAMILY NOT NAMED; [1.11.1.7] Peroxidase.; [GO:0006979] response to oxidative stress; [GO:0004601] peroxidase activity
Mapoly0051s0117	33	29	41	31	33.5	2.19383	0	0	1	0	0.25	0	0.0245636	-7.06599	1.46109	-7.53644	5.73573e-17	2.64653e-15	[PF12937] F-box-like; [GO:0005515] protein binding
Mapoly0043s0119	43	170	105	147	116.25	6.99286	0	0	5	1	1.5	0	0.153015	-6.27611	3.72071	-6.69186	6.31369e-17	2.90626e-15
Mapoly0002s0248	102	96	109	75	95.5	23.9851	11	8	7	5	7.75	2.01374	1.34462	-3.62323	4.7766	-3.90121	6.36532e-17	2.92305e-15	[PF04885] Stigma-specific protein, Stig1
Mapoly0059s0095	385.613	263.901	208.999	279.929	284.611	10.0564	56.9471	44.9472	47.761	27.8183	44.3684	1.56058	1.19413	-2.68138	6.80652	-2.931	6.58572e-17	3.01708e-15
Mapoly0006s0035	118.199	174.506	90.7584	131.871	128.834	4.0161	0	4.5977	1.24316	7.61185	3.36318	0.0721174	0.142672	-5.25953	4.51556	-5.29085	6.70465e-17	3.06428e-15
Mapoly0015s0186	28	94	35	73	57.5	16.5996	0	0	0	0	0	0	0	-21.679	-15.2261	-22.1727	7.32188e-17	3.33846e-15
Mapoly0184s0006	161	227	160	180	182	3.99016	8	12	28	7	13.75	0.194765	0.31313	-3.72643	5.64958	-4.03549	7.52334e-17	3.42223e-15
Mapoly0228s0004	25	92	78	67	65.5	2.05131	0	1	0	0	0.25	0.0154291	0	-8.03332	2.16663	-8.14964	8.76489e-17	3.97761e-15	[PTHR11795] UNCHARACTERIZED; [PF12819] Carbohydrate-binding protein of the ER
Mapoly0075s0061	57	97	105	92	87.75	2.40073	2	4	5	4	3.75	0.0729347	0.10791	-4.54843	4.24781	-4.79512	8.79267e-17	3.98085e-15
Mapoly0045s0123	55	168	142	128	123.25	7.76449	7	6	5	2	5	0.365109	0.195299	-4.62351	4.66318	-4.96958	9.38766e-17	4.24028e-15
Mapoly0054s0119	35	106	63	71	68.75	2.31787	0	2	1	0	0.75	0.0330766	0.0124191	-6.51829	2.9241	-6.7369	1.04163e-16	4.69389e-15
Mapoly0028s0121	25	70	80	91	66.5	38.2052	0	0	0	1	0.25	0	0.295982	-8.05518	2.23505	-8.07858	1.13204e-16	5.08945e-15
Mapoly0089s0019	316	523	398	455	423	11.9252	38	63	53	56	52.5	1.26128	1.39469	-3.01027	7.28328	-3.23134	1.16217e-16	5.21275e-15
Mapoly0007s0259	88	132	152	89	115.25	2.58476	6	10	5	5	6.5	0.158762	0.101138	-4.14818	4.83633	-4.38077	1.18651e-16	5.30958e-15
Mapoly0020s0059	85	170	156	133	136	4.38014	16	6	10	5	9.25	0.276715	0.203591	-3.87801	5.14885	-4.25294	1.36512e-16	6.09469e-15	[KOG0028] Ca2+-binding protein (centrin/caltractin), EF-Hand superfamily protein; [PTHR23050] CALCIUM BINDING PROTEIN; [PF13833] EF-hand domain pair; [PTHR23050:SF90] PROBABLE CALCIUM-BINDING PROTEIN CML9; [GO:0005509] calcium ion binding
Mapoly0037s0103	25	54	38	36	38.25	6.76898	0	0	0	0	0	0	0	-21.0909	-15.2261	-21.5771	1.40332e-16	6.25075e-15
Mapoly0629s0001	50	159	101	121	107.75	1.74124	4	0	6	1	2.75	0.0226707	0.0440084	-5.2921	4.06421	-5.76653	1.45237e-16	6.45435e-15	[GO:0006355] regulation of transcription, DNA-dependent; [PF02671] Paired amphipathic helix repeat; [PTHR12346] SIN3B-RELATED; [K11644] paired amphipathic helix protein Sin3a; [PF08295] Sin3 family co-repressor; [GO:0005634] nucleus; [KOG4204] Histone deacetylase complex, SIN3 component
Mapoly0159s0005	149	68	63	47	81.75	4.33604	0	3	2	4	2.25	0.0846034	0.163315	-5.18321	3.8285	-5.19324	1.86462e-16	8.26734e-15
Mapoly0040s0123	25	117	122	157	105.25	2.26284	0	2	0	0	0.5	0.0217493	0	-7.71763	3.0201	-7.85657	2.0842e-16	9.21971e-15
Mapoly0032s0138	42	49	43	23	39.25	3.77271	0	1	0	0	0.25	0.0487517	0	-7.29452	1.76408	-7.34454	2.18387e-16	9.63851e-15
Mapoly0002s0031	19	70	68	72	57.25	4.0137	0	0	0	0	0	0	0	-21.6727	-15.2261	-22.1982	2.28641e-16	1.0068e-14	[PF13837] Myb/SANT-like DNA-binding domain
Mapoly0015s0025	32	208	147	164	137.75	12.4238	1	1	4	2	2	0.0744878	0.223172	-6.1059	4.10208	-6.44557	2.42539e-16	1.06557e-14	[PTHR11746] O-METHYLTRANSFERASE; [GO:0046983] protein dimerization activity; [GO:0008171] O-methyltransferase activity; [KOG3178] Hydroxyindole-O-methyltransferase and related SAM-dependent methyltransferases; [PF08100] Dimerisation domain; [PF00891] O-methyltransferase
Mapoly0020s0115	22	63	94	51	57.5	2.29225	0	0	0	0	0	0	0	-21.679	-15.2261	-22.2061	2.51608e-16	1.1029e-14
Mapoly0022s0033	43	82	60	66	62.75	1.4008	1	2	4	1	2	0.0299809	0.0449546	-4.97153	3.50693	-5.28666	3.12913e-16	1.36851e-14
Mapoly0167s0008	810	3440	2193	3032	2368.75	122.364	318	311	350	310	322.25	13.4821	14.8768	-2.87787	9.832	-3.17343	3.39079e-16	1.4796e-14	[GO:0008654] phospholipid biosynthetic process; [GO:0016780] phosphotransferase activity, for other substituted phosphate groups; [KOG3964] Phosphatidylglycerolphosphate synthase; [2.7.8.5] CDP-diacylglycerol--glycerol-3-phosphate 3-phosphatidyltransferase.; [PTHR12586] CDP-DIACYLGLYCEROL--SERINE O-PHOSPHATIDYLTRANSFERASE; [K00995] CDP-diacylglycerol--glycerol-3-phosphate 3-phosphatidyltransferas…
Mapoly0061s0011	27	104	90	131	88	9.1701	0	0	3	0	0.75	0	0.112603	-6.87444	2.97909	-7.40251	3.45788e-16	1.50546e-14	[PTHR26374] FAMILY NOT NAMED; [PF13912] C2H2-type zinc finger
Mapoly0009s0118	21	59	55	42	44.25	5.02357	0	0	0	0	0	0	0	-21.3011	-15.2261	-21.8094	3.59271e-16	1.55714e-14
Mapoly0013s0200	56	76	56	45	58.25	1.69845	5	2	2	2	2.75	0.0821693	0.0535838	-4.40475	3.65964	-4.70987	4.08203e-16	1.76525e-14	[PF06565] Repeat of unknown function (DUF1126); [PTHR12086] EF-HAND DOMAIN (C-TERMINAL) CONTAINING PROTEIN; [KOG0043] Uncharacterized conserved protein, contains DM10 domain
Mapoly0093s0030	48	59	57	54	54.5	3.66802	3	0	4	2	2.25	0.072288	0.172692	-4.59825	3.45159	-4.96542	4.20879e-16	1.816e-14
Mapoly0096s0002	21	59	40	54	43.5	1.16651	0	0	0	0	0	0	0	-21.2765	-15.2261	-21.7811	4.22766e-16	1.82006e-14
Mapoly0045s0078	24	41	30	38	33.25	5.5511	0	0	0	0	0	0	0	-20.8888	-15.2261	-21.3728	4.45086e-16	1.91189e-14	[PF03018] Dirigent-like protein
Mapoly0088s0082	27	84	77	74	65.5	4.41326	2	1	1	0	1	0.079488	0.0244961	-6.0334	3.00606	-6.47169	4.9585e-16	2.12521e-14
Mapoly0120s0022	635	1224	882	1226	991.75	32.6429	80	122	137	195	133.5	2.90467	5.0493	-2.89314	8.5883	-3.10112	5.07259e-16	2.16929e-14	[PTHR10588] FAMILY NOT NAMED; [KOG1644] U2-associated snRNP A' protein; [PF12799] Leucine Rich repeats (2 copies); [PTHR10588:SF7] LEUCINE-RICH REPEAT-CONTAINING PROTEIN 50
Mapoly0036s0085	21	46	41	44	38	2.02184	0	0	0	0	0	0	0	-21.0814	-15.2261	-21.5845	5.47154e-16	2.33472e-14
Mapoly0054s0068	178	314	246	265	250.75	8.11088	9	19	22	1	12.75	0.407151	0.281282	-4.29768	5.83729	-4.62168	6.43974e-16	2.73576e-14
Mapoly0051s0112	43	112	80	80	78.75	4.33735	5	1	3	3	3	0.125775	0.149829	-4.71424	3.95892	-5.06016	6.81574e-16	2.88279e-14
Mapoly0187s0008	53	76	72	57	64.5	1.85235	6	3	2	2	3.25	0.104403	0.0520787	-4.31078	3.86567	-4.63063	6.90956e-16	2.91607e-14
Mapoly0071s0099	212	407	309	320	312	3.51569	36	42	31	39	37	0.389575	0.410563	-3.07595	6.80814	-3.31373	7.34252e-16	3.09204e-14	[KOG2106] Uncharacterized conserved protein, contains HELP and WD40 domains; [GO:0005515] protein binding; [PTHR13720] WD-40 REPEAT PROTEIN; [PF00400] WD domain, G-beta repeat
Mapoly0112s0036	51	90	89	87	79.25	3.59367	5	3	6	0	3.5	0.146626	0.100221	-4.50098	4.03459	-4.92599	7.54604e-16	3.17082e-14
Mapoly0133s0006	24	30	45	52	37.75	2.52219	1	0	0	0	0.25	0.0233479	0	-7.23831	1.52965	-7.81888	8.54709e-16	3.58365e-14
Mapoly0021s0117	24	43	32	28	31.75	1.66181	0	0	0	0	0	0	0	-20.8222	-15.2261	-21.2997	8.79587e-16	3.67995e-14	[GO:0042393] histone binding; [PF12165] Domain of unknown function (DUF3594); [GO:0006355] regulation of transcription, DNA-dependent; [PTHR12321] CPG BINDING PROTEIN
Mapoly0014s0185	619	740	562	755	669	11.624	22	97	35	62	54	0.980891	0.806647	-3.63097	7.66193	-3.76664	8.90968e-16	3.7195e-14	[GO:0016020] membrane; [GO:0055085] transmembrane transport; [KOG4629] Predicted mechanosensitive ion channel; [PTHR31618] FAMILY NOT NAMED; [PF00924] Mechanosensitive ion channel
Mapoly0148s0025	312	366	194	262	283.5	9.29357	22	34	16	35	26.75	0.831397	0.827088	-3.40574	6.50581	-3.55141	9.06228e-16	3.77504e-14
Mapoly0150s0020	908	699	707	467	695.25	29.945	208	184	116	85	148.25	7.37042	3.94042	-2.2295	8.33043	-2.46976	9.19974e-16	3.82404e-14	[PF01453] D-mannose binding lectin
Mapoly0019s0157	59	83	82	65	72.25	2.66268	6	1	3	5	3.75	0.0972166	0.139402	-4.26803	4.06789	-4.55667	9.31283e-16	3.86272e-14
Mapoly0135s0029	19	72	53	45	47.25	2.25493	0	0	0	0	0	0	0	-21.3958	-15.2261	-21.9049	9.6955e-16	4.00473e-14
Mapoly0014s0167	281	544	469	521	453.75	12.4202	52	65	77	64	64.5	1.37414	1.69763	-2.81453	7.47512	-3.07966	9.69672e-16	4.00473e-14	[PF12317] Intraflagellar transport complex B protein 46 C terminal; [PTHR13376:SF0] SUBFAMILY NOT NAMED; [GO:0042073] intraflagellar transport; [PTHR13376] UNCHARACTERIZED
Mapoly0110s0003	57	34	46	49	46.5	5.95655	2	1	3	1	1.75	0.158243	0.215936	-4.73179	3.15291	-5.05394	9.92477e-16	4.09015e-14
Mapoly0082s0013	22	101	88	89	75	4.33688	0	0	2	1	0.75	0	0.0715735	-6.64382	2.95643	-6.9816	1.05258e-15	4.32858e-14
Mapoly0017s0005	1367	2351	1940	2644	2075.5	185.782	747	312	416	501	494	36.573	37.3864	-2.07088	10.0164	-2.3787	1.10749e-15	4.54473e-14
Mapoly0009s0103	18	60	72	53	50.75	2.82165	0	0	0	0	0	0	0	-21.4988	-15.2261	-22.0248	1.11853e-15	4.58027e-14
Mapoly0034s0003	2687	3059	2392	2576	2678.5	142.413	831	1100	886	707	881	45.4435	38.1191	-1.60421	10.621	-1.83353	1.13032e-15	4.61875e-14	[GO:0055114] oxidation-reduction process; [GO:0008270] zinc ion binding; [PF08240] Alcohol dehydrogenase GroES-like domain; [GO:0016491] oxidoreductase activity; [KOG1198] Zinc-binding oxidoreductase; [PTHR11695:SF294] SUBFAMILY NOT NAMED; [PF13602] Zinc-binding dehydrogenase; [PTHR11695] ALCOHOL DEHYDROGENASE RELATED
Mapoly0150s0003	452	1613	951	1364	1095	59.6456	20	63	4	33	30	2.05025	1.01734	-5.18982	7.62312	-5.34859	1.14396e-15	4.6646e-14	[GO:0000287] magnesium ion binding; [GO:0016829] lyase activity; [PF03936] Terpene synthase family, metal binding domain; [GO:0010333] terpene synthase activity
Mapoly0144s0022	333	390	222	308	313.25	10.3916	36	47	61	17	40.25	1.22607	1.07757	-2.96025	6.81303	-3.23597	1.16609e-15	4.74481e-14	[KOG0157] Cytochrome P450 CYP4/CYP19/CYP26 subfamilies; [GO:0005506] iron ion binding; [GO:0055114] oxidation-reduction process; [GO:0016705] oxidoreductase activity, acting on paired donors, with incorporation or reduction of molecular oxygen; [PTHR24296] FAMILY NOT NAMED; [GO:0020037] heme binding; [PF00067] Cytochrome P450
Mapoly0026s0022	164	300	288	285	259.25	5.02536	18	33	17	22	22.5	0.436619	0.345609	-3.52635	6.33313	-3.74938	1.22016e-15	4.95436e-14
Mapoly0178s0020	808	953	704	773	809.5	27.3687	292	153	206	251	225.5	6.18035	7.221	-1.8439	8.76373	-2.09401	1.37303e-15	5.56338e-14	[PF13414] TPR repeat; [PTHR23083] TETRATRICOPEPTIDE REPEAT PROTEIN, TPR
Mapoly0044s0048	64	68	92	47	67.75	4.28323	6	0	3	2	2.75	0.13611	0.138866	-4.62271	3.73381	-5.02489	1.44344e-15	5.8364e-14
Mapoly0129s0015	24	27	35	33	29.75	6.14485	0	0	0	0	0	0	0	-20.7283	-15.2261	-21.2154	1.56005e-15	6.2947e-14
Mapoly0037s0095	28	35	20	36	29.75	1.65034	0	0	0	0	0	0	0	-20.7283	-15.2261	-21.1899	1.62544e-15	6.54485e-14
Mapoly0055s0106	91	125	109	112	109.25	2.09006	8	7	14	11	10	0.121302	0.212292	-3.44956	5.085	-3.71063	1.65919e-15	6.66681e-14
Mapoly0039s0064	44	66	41	58	52.25	5.88326	0	3	0	2	1.25	0.168665	0.120574	-5.38541	3.16318	-5.41392	1.75628e-15	7.0423e-14
Mapoly0136s0013	25	59	46	49	44.75	1.58421	1	1	1	0	0.75	0.029789	0.0130179	-5.89882	2.53871	-6.27361	1.82214e-15	7.29121e-14
Mapoly0003s0112	20	42	50	37	37.25	2.51811	0	0	0	0	0	0	0	-21.0527	-15.2261	-21.5615	1.84631e-15	7.37261e-14
Mapoly0069s0055	28	42	47	45	40.5	2.67806	1	0	0	1	0.5	0.0233266	0.0348203	-6.3398	2.23198	-6.59097	1.85093e-15	7.37581e-14
Mapoly0012s0042	82	164	131	158	133.75	6.77084	0	9	0	1	2.5	0.223524	0.0266319	-5.74146	4.33825	-5.82755	1.89501e-15	7.53591e-14	[PF01522] Polysaccharide deacetylase; [GO:0005975] carbohydrate metabolic process; [GO:0016810] hydrolase activity, acting on carbon-nitrogen (but not peptide) bonds
Mapoly0111s0042	32.942	46.1016	29.5356	36.4392	36.2546	1.07232	2.32798	0	0	1.14493	0.868228	0.0248201	0.0182214	-5.38392	2.48422	-5.70345	1.91031e-15	7.58111e-14
Mapoly0044s0134	36.7323	100.043	72.3143	87.4995	74.1473	2.88597	0	4.10945	0	0	1.02736	0.0827711	0	-6.17335	3.26994	-6.27838	2.05526e-15	8.13961e-14
Mapoly0191s0004	34	99	90	75	74.5	6.52403	1	2	4	1	2	0.115722	0.173519	-5.21916	3.64284	-5.55848	2.07377e-15	8.19607e-14	[PTHR31656] FAMILY NOT NAMED; [PTHR31656:SF0] SUBFAMILY NOT NAMED; [PF06830] Root cap
Mapoly0076s0097	32	68	50	53	50.75	4.92275	1	1	0	2	1	0.082086	0.102449	-5.66531	2.94659	-5.80446	2.11463e-15	8.34048e-14
Mapoly1761s0001	21	33	49	44	36.75	3.76424	0	0	0	0	0	0	0	-21.0332	-15.2261	-21.5453	2.13497e-15	8.4035e-14	[GO:0055114] oxidation-reduction process; [PF00141] Peroxidase; [GO:0020037] heme binding; [PTHR31235] FAMILY NOT NAMED; [GO:0006979] response to oxidative stress; [GO:0004601] peroxidase activity
Mapoly0026s0089	32	81	66	54	58.25	2.18844	1	1	3	1	1.5	0.0316383	0.0612215	-5.27921	3.24475	-5.62127	2.17504e-15	8.54378e-14
Mapoly0152s0007	288	886	768	968	727.5	19.5643	38	60	24	4	31.5	1.13393	0.289811	-4.52952	7.29497	-4.8461	2.29929e-15	9.01351e-14
Mapoly0020s0172	134	313	290	345	270.5	57.6112	40	20	25	24	27.25	5.0414	4.60428	-3.3113	6.46146	-3.64242	2.47165e-15	9.66951e-14
Mapoly0060s0069	26	25	25	35	27.75	1.14528	0	0	1	0	0.25	0	0.0154484	-6.79432	1.32608	-7.26641	2.68295e-15	1.04696e-13
Mapoly0007s0141	28	104	66	94	73	2.98298	1	0	3	1	1.25	0.0142352	0.0658914	-5.86788	3.25619	-6.2779	2.68702e-15	1.04696e-13
Mapoly0005s0288	131	325	233	312	250.25	7.6183	16	17	15	27	18.75	0.423603	0.597877	-3.73841	6.18066	-3.9635	2.80902e-15	1.09229e-13
Mapoly0105s0018	34	103	78	77	73	7.38163	0	3	1	2	1.5	0.147875	0.142727	-5.60485	3.52142	-5.73396	2.8617e-15	1.11054e-13
Mapoly0009s0145	84	249	185	227	186.25	3.17572	0	4	4	11	4.75	0.0331618	0.122691	-5.29316	5.03579	-5.41413	2.90476e-15	1.12498e-13	[KOG2041] WD40 repeat protein; [GO:0005515] protein binding; [PTHR16517:SF1] WD REPEAT-CONTAINING PROTEIN 35; [PF07676] WD40-like Beta Propeller Repeat; [PTHR16517] TUBBY-RELATED; [PF00400] WD domain, G-beta repeat
Mapoly0028s0108	66	90	88	79	80.75	2.80202	8	6	8	5	6.75	0.202359	0.19585	-3.5805	4.56792	-3.87885	2.91733e-15	1.12758e-13
Mapoly0092s0073	22	48	43	26	34.75	1.70956	0	0	0	0	0	0	0	-20.9525	-15.2261	-21.4433	2.9876e-15	1.15244e-13	[PF00923] Transaldolase; [PTHR10683] TRANSALDOLASE; [K00616] transaldolase [EC:2.2.1.2]; [KOG2772] Transaldolase; [GO:0005975] carbohydrate metabolic process; [2.2.1.2] Transaldolase.; [PTHR10683:SF3] TRANSALDOLASE 1
Mapoly0013s0024	167	288	206	249	227.5	44.4105	47	23	24	22	29	5.48903	4.02404	-2.97174	6.36086	-3.28696	3.04436e-15	1.17199e-13
Mapoly0186s0011	25	72	62	46	51.25	2.08563	2	1	0	0	0.75	0.0483946	0	-6.09449	2.62852	-6.49691	3.08942e-15	1.18696e-13
Mapoly0027s0029	21	34	41	30	31.5	26.3119	0	0	0	0	0	0	0	-20.8108	-15.2261	-21.3077	3.20668e-15	1.22957e-13
Mapoly0030s0041	23	58	75	28	46	2.00661	0	0	0	0	0	0	0	-21.3571	-15.2261	-21.8676	3.2167e-15	1.23054e-13
Mapoly0009s0088	369	728	638	793	632	43.457	161	81	147	103	123	6.60893	7.42152	-2.36127	8.15071	-2.69418	3.22197e-15	1.23054e-13	[PF14368] Probable lipid transfer
Mapoly0087s0063	495	796	717	779	696.75	96.9017	185	110	125	35	113.75	16.6553	9.00983	-2.61477	8.13593	-2.98035	3.27014e-15	1.24646e-13	[GO:0016021] integral to membrane; [PF06140] Interferon-induced 6-16 family
Mapoly0019s0002	449	804	648	702	650.75	14.1435	191	120	181	133	156.25	2.7581	2.98683	-2.05825	8.34488	-2.36347	3.82931e-15	1.45672e-13	[PTHR12176] UNCHARACTERIZED; [KOG2352] Predicted spermine/spermidine synthase
Mapoly0016s0120	19	45	42	33	34.75	3.57311	0	0	0	0	0	0	0	-20.9525	-15.2261	-21.4544	4.01438e-15	1.52412e-13
Mapoly0125s0024	492.627	927.348	927.791	929.841	819.402	9.52513	114.494	181.809	166.145	149.17	152.904	1.50104	1.61851	-2.42194	8.53453	-2.6752	4.16342e-15	1.57451e-13
Mapoly0129s0014	23	47	52	37	39.75	10.5369	0	1	0	0	0.25	0.0519541	0	-7.31278	1.80018	-7.41673	4.26808e-15	1.61093e-13
Mapoly0062s0044	27	48	19	35	32.25	3.56184	0	0	0	0	0	0	0	-20.8447	-15.2261	-21.3069	4.2854e-15	1.61431e-13
Mapoly0024s0076	151	223	279	213	216.5	4.32835	31	6	15	21	18.25	0.277549	0.331681	-3.5684	5.99965	-3.8933	4.30997e-15	1.6204e-13
Mapoly0051s0081	22	61	100	51	58.5	3.01272	0	0	1	0	0.25	0	0.0185594	-7.87027	1.89297	-8.4002	4.37377e-15	1.64118e-13
Mapoly0175s0018	141	116	130	129	129	1.28011	0	11	0	1	3	0.0550171	0.00536321	-5.42626	4.42323	-5.47501	4.96893e-15	1.86089e-13
Mapoly0038s0070	125	199	173	256	188.25	6.21393	16	14	31	15	19	0.416654	0.643467	-3.30858	5.9313	-3.62669	5.32151e-15	1.98907e-13	[PTHR11527] SMALL HEAT-SHOCK PROTEIN (HSP20) FAMILY; [PF00011] Hsp20/alpha crystallin family
Mapoly0026s0107	24	58	63	23	42	1.58753	0	0	0	0	0	0	0	-21.2258	-15.2261	-21.7247	5.58284e-15	2.08271e-13
Mapoly0224s0009	52	56	20	34	40.5	4.5958	2	1	0	0	0.75	0.143099	0	-5.75486	2.41527	-6.07041	5.72453e-15	2.13145e-13
Mapoly0004s0012	202	206	193	193	198.5	5.48101	7	28	16	6	14.25	0.458643	0.256184	-3.8001	5.7839	-4.00385	5.81183e-15	2.15978e-13	[PF13855] Leucine rich repeat; [PF08263] Leucine rich repeat N-terminal domain; [GO:0005515] protein binding; [PTHR24420] LEUCINE-RICH REPEAT RECEPTOR-LIKE PROTEIN KINASE; [KOG0472] Leucine-rich repeat protein
Mapoly0119s0050	27	114	86	91	79.5	2.61885	1	2	1	2	1.5	0.0432875	0.0461091	-5.7279	3.5541	-5.93881	6.38986e-15	2.36725e-13	[KOG2615] Permease of the major facilitator superfamily; [PTHR24003] MAJOR FACILITATOR SUPERFAMILY DOMAIN-CONTAINING PROTEIN-RELATED; [GO:0016021] integral to membrane; [GO:0055085] transmembrane transport; [PF07690] Major Facilitator Superfamily
Mapoly0061s0054	2507	3704	3232	3337	3195	67.7978	1277	343	1031	367	754.5	13.3321	12.2647	-2.08222	10.5798	-2.47037	6.39466e-15	2.36725e-13	[PF00134] Cyclin, N-terminal domain; [PTHR10177] CYCLINE
Mapoly0067s0027	61	167	84	116	107	3.64706	2	7	2	5	4	0.141769	0.115331	-4.74146	4.47671	-4.89272	6.66839e-15	2.46385e-13
Mapoly0069s0086	49	28	25	16	29.5	1.46495	0	0	0	0	0	0	0	-20.7162	-15.2261	-21.1097	6.75841e-15	2.49234e-13
Mapoly0007s0015	957	1510	1250	1428	1286.25	19.3423	302	399	388	351	360	4.5814	4.96667	-1.8371	9.46442	-2.08276	7.14684e-15	2.63055e-13	[PF13855] Leucine rich repeat; [KOG4658] Apoptotic ATPase; [GO:0005515] protein binding; [PF00560] Leucine Rich Repeat; [PTHR23155] LEUCINE-RICH REPEAT-CONTAINING PROTEIN; [GO:0043531] ADP binding; [PF00931] NB-ARC domain
Mapoly0013s0148	24	41	21	28	28.5	1.27237	0	0	0	0	0	0	0	-20.6664	-15.2261	-21.1306	7.27978e-15	2.67438e-13
Mapoly0008s0163	41	116	93	82	83	5.05863	0	5	2	2	2.25	0.148787	0.108509	-5.2051	3.88937	-5.36431	7.62766e-15	2.79686e-13	[PF03735] ENT domain; [KOG4675] Uncharacterized conserved protein, contains ENT domain
Mapoly0324s0001	16	59	48	43	41.5	3.01063	0	0	0	0	0	0	0	-21.2086	-15.2261	-21.7226	7.94827e-15	2.90888e-13
Mapoly0028s0059	29	23	26	19	24.25	1.11111	0	0	0	0	0	0	0	-20.4334	-15.2261	-20.8782	8.09281e-15	2.95617e-13
Mapoly0048s0036	43	111	131	82	91.75	7.0786	4	0	5	4	3.25	0.107532	0.301026	-4.81919	4.13718	-5.17829	9.87984e-15	3.60213e-13
Mapoly0067s0026	36	154	138	118	111.5	4.12149	0	5	0	0	1.25	0.0891096	0	-6.47895	3.71476	-6.60205	1.0292e-14	3.73125e-13
Mapoly0099s0022	42.1647	15.9484	29.9211	24.7809	28.2038	2.7217	0	0	0	0	0	0	0	-20.6513	-15.2261	-21.0765	1.03806e-14	3.75544e-13
Mapoly0039s0087	349	586	439	534	477	12.0039	22	78	29	20	37.25	1.16814	0.538257	-3.67868	7.13376	-3.88038	1.03977e-14	3.75544e-13	[PF03781] Sulfatase-modifying factor enzyme 1; [PTHR30468] ALPHA-KETOGLUTARATE-DEPENDENT SULFONATE DIOXYGENASE; [PF10017] Histidine-specific methyltransferase, SAM-dependent
Mapoly0013s0007	59	103	92	72	81.5	2.07373	6	8	3	2	4.75	0.154979	0.0553613	-4.1008	4.34201	-4.36794	1.07842e-14	3.88632e-13
Mapoly0027s0137	80	247	199	185	177.75	4.16519	20	10	18	11	14.75	0.277873	0.28865	-3.59106	5.70376	-3.94216	1.08004e-14	3.88632e-13
Mapoly0014s0062	28	50	52	44	43.5	2.57378	1	0	0	2	0.75	0.0208532	0.0622565	-5.85795	2.62271	-6.0191	1.11036e-14	3.98797e-13
Mapoly0059s0083	31	35	35	45	36.5	1.76149	1	1	2	0	1	0.0411273	0.0359456	-5.1898	2.57462	-5.57542	1.13656e-14	4.07452e-13
Mapoly0023s0038	1399	2552	1978	2161	2022.5	85.3525	768	625	775	469	659.25	24.5192	22.6061	-1.61724	10.2011	-1.92078	1.13947e-14	4.07735e-13	[PF13917] Zinc knuckle; [PTHR13491] ZCCHC10 PROTEIN
Mapoly0163s0004	65	141	129	119	113.5	2.23337	4	11	3	4	5.5	0.133559	0.0629796	-4.36711	4.73315	-4.5734	1.1509e-14	4.11063e-13	[PTHR32133] FAMILY NOT NAMED; [GO:0005515] protein binding; [PF00646] F-box domain
Mapoly0135s0056	17	43	40	35	33.75	2.20336	0	0	0	0	0	0	0	-20.9103	-15.2261	-21.4171	1.22096e-14	4.35282e-13	[GO:0016020] membrane; [PTHR19139] AQUAPORIN TRANSPORTER; [GO:0006810] transport; [KOG0223] Aquaporin (major intrinsic protein family); [K09873] aquaporin TIP; [GO:0005215] transporter activity; [PF00230] Major intrinsic protein
Mapoly0084s0062	47	117	127	124	103.75	6.82065	1	4	1	6	3	0.155758	0.229229	-5.112	4.28718	-5.23821	1.33092e-14	4.73607e-13
Mapoly0079s0033	536	1143	766	958	850.75	7.80784	97	176	87	144	126	1.11064	0.993382	-2.75531	8.43679	-2.9573	1.37098e-14	4.86965e-13
Mapoly0118s0027	322	667	515	659	540.75	12.3994	64	91	76	20	62.75	1.53932	0.882371	-3.10727	7.55873	-3.42021	1.3744e-14	4.87282e-13	[PTHR31642] FAMILY NOT NAMED; [GO:0016747] transferase activity, transferring acyl groups other than amino-acyl groups; [PF02458] Transferase family
Mapoly0314s0004	19	44	27	54	36	1.65605	0	0	0	0	0	0	0	-21.0034	-15.2261	-21.5064	1.41573e-14	5.01014e-13	[GO:0005840] ribosome; [PF00861] Ribosomal L18p/L5e family; [GO:0003735] structural constituent of ribosome; [PTHR23410] RIBOSOMAL PROTEIN L5-RELATED; [GO:0005622] intracellular; [GO:0008097] 5S rRNA binding; [KOG0875] 60S ribosomal protein L5; [PF14204] Ribosomal L18 C-terminal region; [GO:0006412] translation
Mapoly0033s0095	279	515	367	503	416	6.54051	86	68	87	35	69	0.934749	0.857095	-2.59191	7.42101	-2.9224	1.51169e-14	5.33992e-13	[PTHR10593] SERINE/THREONINE-PROTEIN KINASE RIO
Mapoly0052s0072	70	191	102	140	125.75	1.89144	3	10	1	2	4	0.0899584	0.0214296	-4.97441	4.58219	-5.15328	1.55889e-14	5.48657e-13	[PF07719] Tetratricopeptide repeat; [PTHR23083] TETRATRICOPEPTIDE REPEAT PROTEIN, TPR
Mapoly0005s0271	24	53	35	47	39.75	4.16514	0	1	0	1	0.5	0.053839	0.0577319	-6.31283	2.32165	-6.35385	1.67064e-14	5.85847e-13
Mapoly0019s0048	50	46	41	44	45.25	2.68616	0	4	0	2	1.5	0.120134	0.0644104	-4.91487	3.17802	-4.93151	1.6998e-14	5.9499e-13
Mapoly1497s0001	55	283	229	328	223.75	19.6239	1	9	0	3	3.25	0.407862	0.135009	-6.1053	4.90821	-6.24409	1.73586e-14	6.06515e-13
Mapoly0021s0091	87	159	138	138	130.5	3.66512	6	4	12	14	9	0.114904	0.332171	-3.85798	5.16245	-4.09885	1.80037e-14	6.27916e-13
Mapoly0066s0091	1162	1446	1108	1375	1272.75	35.6019	122	350	192	237	225.25	6.12498	5.57463	-2.49835	9.13841	-2.67054	1.81909e-14	6.333e-13	[PTHR21152:SF7] SUBFAMILY NOT NAMED; [GO:0008152] metabolic process; [PTHR21152] AMINOTRANSFERASE CLASS V; [KOG2862] Alanine-glyoxylate aminotransferase AGT1; [PF00266] Aminotransferase class-V
Mapoly0054s0069	28	88	47	58	55.25	7.41455	1	2	0	1	1	0.179149	0.0706687	-5.78788	2.99583	-5.95918	1.82483e-14	6.34151e-13
Mapoly0817s0001	45	47	98	42	58	3.65547	1	0	0	3	1	0.0222313	0.0995559	-5.85796	3.0597	-5.9755	1.8321e-14	6.35533e-13	[PTHR31301] FAMILY NOT NAMED; [PF03195] Protein of unknown function DUF260
Mapoly0144s0024	26	26	48	40	35	8.18263	0	0	0	1	0.25	0	0.122695	-7.12918	1.75885	-7.12618	1.86536e-14	6.45911e-13	[GO:0005506] iron ion binding; [GO:0055114] oxidation-reduction process; [GO:0016705] oxidoreductase activity, acting on paired donors, with incorporation or reduction of molecular oxygen; [PTHR24296] FAMILY NOT NAMED; [GO:0020037] heme binding; [PF00067] Cytochrome P450
Mapoly0147s0021	132	67	31	55	71.25	4.37894	4	3	2	3	3	0.193012	0.155069	-4.56985	3.85937	-4.71617	2.04159e-14	7.05667e-13	[KOG1577] Aldo/keto reductase family proteins; [PTHR11732] ALDO/KETO REDUCTASE; [PF00248] Aldo/keto reductase family
Mapoly0009s0215	57	145	93	110	101.25	4.34349	10	7	9	3	7.25	0.298872	0.210197	-3.80379	4.77065	-4.15648	2.11269e-14	7.28936e-13
Mapoly0001s0504	17	34	44	36	32.75	2.98535	0	0	0	0	0	0	0	-20.8669	-15.2261	-21.3802	2.22311e-14	7.65664e-13
Mapoly0064s0062	19	30	29	26	26	6.32988	0	0	0	0	0	0	0	-20.534	-15.2261	-21.0209	2.23852e-14	7.69595e-13
Mapoly0053s0098	27	65	50	50	48	8.17975	3	0	1	1	1.25	0.180028	0.152308	-5.26302	2.93295	-5.68471	2.55043e-14	8.75268e-13
Mapoly0089s0018	220	160	116	105	150.25	12.625	4	11	10	18	10.75	0.606561	1.1722	-3.80495	5.38871	-3.89183	2.59211e-14	8.87993e-13
Mapoly0001s0367	24	58	59	73	53.5	3.13664	1	0	0	2	0.75	0.0203552	0.0607695	-6.15647	2.78243	-6.33854	2.63072e-14	8.99623e-13
Mapoly0059s0102	52.7326	154.199	111.222	110.563	107.179	2.36224	1.18293	2.48602	2.30159	8.06973	3.51007	0.0469991	0.105288	-4.93237	4.40636	-5.06484	2.63811e-14	9.00553e-13	[PF01167] Tub family; [KOG2502] Tub family proteins; [PTHR16517] TUBBY-RELATED; [PTHR16517:SF7] TUBBY PROTEIN-RELATED
Mapoly0107s0047	28	75	83	51	59.25	7.72277	2	2	2	0	1.5	0.217625	0.0951032	-5.30376	3.24755	-5.69129	2.67655e-14	9.12062e-13
Mapoly0006s0059	24	22	19	27	23	1.08411	0	0	1	0	0.25	0	0.0178052	-6.52346	1.18403	-6.98232	2.81622e-14	9.57962e-13
Mapoly0062s0088	807	1199	908	1004	979.5	38.6901	407	267	398	293	341.25	11.005	12.0613	-1.52122	9.19788	-1.80971	2.84331e-14	9.65475e-13	[GO:0008915] lipid-A-disaccharide synthase activity; [PTHR30372] LIPID-A-DISACCHARIDE SYNTHASE; [PF02684] Lipid-A-disaccharide synthetase; [GO:0009245] lipid A biosynthetic process
Mapoly0239s0007	157	200	168	174	174.75	2.35585	29	22	7	9	16.75	0.288611	0.100448	-3.38306	5.77907	-3.66379	2.94686e-14	9.98875e-13
Mapoly0007s0265	21.7245	53.3634	38.6534	60.7271	43.6171	1.03817	1.10357	1.12512	0	0	0.557172	0.0227637	0	-6.29058	2.34008	-6.61286	2.96958e-14	1.00481e-12	[K09422] myb proto-oncogene protein, plant; [KOG0048] Transcription factor, Myb superfamily; [PF00249] Myb-like DNA-binding domain; [PTHR10641] MYB-LIKE DNA-BINDING PROTEIN MYB; [GO:0003682] chromatin binding
Mapoly0012s0187	45	85	82	74	71.5	2.03966	5	5	6	3	4.75	0.120246	0.10808	-3.91194	4.23742	-4.2234	3.67246e-14	1.24047e-12
Mapoly0021s0040	18	57	46	41	40.5	2.32491	0	1	0	0	0.25	0.0279355	0	-7.33975	1.81647	-7.44932	3.88843e-14	1.31112e-12
Mapoly0048s0013	18	50	40	45	38.25	1.82048	0	0	0	1	0.25	0	0.0248299	-7.25729	1.82709	-7.26266	4.58634e-14	1.54375e-12
Mapoly0136s0014	16	66	54	51	46.75	1.84833	1	0	0	0	0.25	0.0137233	0	-7.5468	1.6893	-8.13819	4.60297e-14	1.54664e-12
Mapoly0024s0096	20	54	21	32	31.75	2.23862	0	0	0	0	0	0	0	-20.8222	-15.2261	-21.2997	5.34884e-14	1.79103e-12
Mapoly0171s0009	36	65	96	102	74.75	3.93429	0	3	5	1	2.25	0.0761012	0.122445	-5.05407	3.75304	-5.37091	5.6028e-14	1.87281e-12
Mapoly0002s0281	229	421	370	375	348.75	4.92053	19	39	29	51	34.5	0.375662	0.545596	-3.33752	6.87004	-3.5227	5.98557e-14	1.99385e-12
Mapoly0026s0088	13	44	46	49	38	1.9281	0	0	0	0	0	0	0	-21.0814	-15.2261	-21.6079	7.59799e-14	2.52224e-12
Mapoly0064s0115	142	334	300	339	278.75	24.453	25	38	32	10	26.25	2.35127	1.47489	-3.40858	6.46187	-3.72308	7.62369e-14	2.52643e-12
Mapoly0076s0048	18	45	35	54	38	7.78183	0	0	1	0	0.25	0	0.0746439	-7.24783	1.57217	-7.75859	7.99482e-14	2.64487e-12
Mapoly0123s0019	229	403	304	317	313.25	3.97653	54	36	78	48	54	0.470382	0.692092	-2.53628	7.04722	-2.83739	8.16488e-14	2.69651e-12
Mapoly1887s0001	17	52	43	62	43.5	1.43906	2	0	0	0	0.5	0.0229399	0	-6.44289	2.13755	-7.03468	8.29349e-14	2.7343e-12	[GO:0005524] ATP binding; [KOG1187] Serine/threonine protein kinase; [PF00069] Protein kinase domain; [GO:0004672] protein kinase activity; [GO:0006468] protein phosphorylation; [PF00139] Legume lectin domain; [GO:0030246] carbohydrate binding; [PTHR24420] LEUCINE-RICH REPEAT RECEPTOR-LIKE PROTEIN KINASE
Mapoly0101s0021	170	334	489	246	309.75	11.0381	18	11	27	38	23.5	0.41465	1.05736	-3.72037	6.49239	-3.9723	8.41843e-14	2.77075e-12	[GO:0003677] DNA binding; [PF00538] linker histone H1 and H5 family; [GO:0000786] nucleosome; [GO:0005634] nucleus; [GO:0006334] nucleosome assembly
Mapoly0041s0015	26	68	80	65	59.75	4.85707	0	1	1	3	1.25	0.0392817	0.155864	-5.57892	3.26056	-5.70373	8.98467e-14	2.94706e-12
Mapoly0008s0112	84	94	94	103	93.75	1.95027	9	14	10	6	9.75	0.212044	0.144468	-3.26534	4.95936	-3.51614	9.20032e-14	3.01267e-12
Mapoly0067s0103	16	43	24	39	30.5	1.35153	0	0	0	0	0	0	0	-20.7642	-15.2261	-21.2621	9.42512e-14	3.08106e-12
Mapoly0001s0302	16	34	25	33	27	4.94863	1	0	0	0	0.25	0.0645548	0	-6.75479	1.28222	-7.32403	9.52804e-14	3.10943e-12
Mapoly0074s0028	20	59	83	59	55.25	3.39477	1	2	1	0	1	0.0801537	0.022142	-5.78788	2.9503	-6.11916	1.09819e-13	3.57192e-12
Mapoly0068s0023	15	30	35	41	30.25	3.26232	0	0	0	0	0	0	0	-20.7524	-15.2261	-21.2681	1.09942e-13	3.57192e-12
Mapoly0076s0068	69	136	117	107	107.25	5.7422	11	11	10	10	10.5	0.49794	0.480302	-3.35251	5.12071	-3.61838	1.10177e-13	3.57192e-12
Mapoly0049s0061	46	65	40	34	46.25	4.10881	3	2	2	3	2.5	0.320753	0.211908	-4.20944	3.46043	-4.42818	1.10193e-13	3.57192e-12	[GO:0016020] membrane; [PTHR11654] OLIGOPEPTIDE TRANSPORTER-RELATED; [PF00854] POT family; [GO:0006810] transport; [GO:0005215] transporter activity
Mapoly0040s0106	555	1027	777	876	808.75	20.0639	279	178	279	214	237.5	4.63463	5.37636	-1.76777	8.806	-2.06663	1.24961e-13	4.04382e-12
Mapoly0046s0094	11	98	91	92	73	4.45912	0	0	0	1	0.25	0	0.0311791	-8.18973	2.30934	-8.22716	1.31167e-13	4.23757e-12
Mapoly0055s0041	44	172	119	138	118.25	3.7532	0	5	0	5	2.5	0.0769358	0.0824989	-5.56376	4.2793	-5.62531	1.33065e-13	4.29168e-12
Mapoly0058s0105	117	174	140	132	140.75	3.16553	21	22	21	15	19.75	0.415716	0.357074	-2.83321	5.75375	-3.09882	1.34702e-13	4.33722e-12	[PTHR10110] SODIUM/HYDROGEN EXCHANGER; [KOG1965] Sodium/hydrogen exchanger protein; [GO:0015299] solute:hydrogen antiporter activity; [GO:0016021] integral to membrane; [GO:0055085] transmembrane transport; [GO:0006812] cation transport; [PF00999] Sodium/hydrogen exchanger family
Mapoly0087s0034	4224	3880	3205	3444	3688.25	47.0101	902	1164	935	1410	1102.75	11.7296	14.3327	-1.74183	11.0293	-1.9155	1.50457e-13	4.8284e-12	[GO:0003723] RNA binding; [GO:0003743] translation initiation factor activity; [PF01176] Translation initiation factor 1A / IF-1; [KOG3403] Translation initiation factor 1A (eIF-1A); [PTHR21668] EIF-1A; [GO:0006413] translational initiation; [K03236] translation initiation factor eIF-1A
Mapoly3318s0001	274	223	95	199	197.75	10.5584	9	2	13	22	11.5	0.234273	0.923035	-4.10397	5.60959	-4.25137	1.52258e-13	4.87806e-12
Mapoly0031s0048	28	62	55	40	46.25	3.37651	4	0	0	1	1.25	0.103088	0.0384706	-5.20943	2.89793	-5.64171	1.53759e-13	4.91798e-12
Mapoly0008s0160	14	64	48	61	46.75	2.31894	1	0	0	0	0.25	0.0259022	0	-7.5468	1.69163	-8.14285	1.6481e-13	5.25754e-12
Mapoly1583s0001	10	82	51	69	53	2.15483	0	0	0	0	0	0	0	-21.5614	-15.2261	-22.09	1.6492e-13	5.25754e-12	[PF08022] FAD-binding domain; [GO:0055114] oxidation-reduction process; [PTHR11972] NADPH OXIDASE; [PF01794] Ferric reductase like transmembrane component; [GO:0016491] oxidoreductase activity; [PTHR11972:SF5] RESPIRATORY BURST OXIDASE; [PF08030] Ferric reductase NAD binding domain
Mapoly0011s0211	49	153	138	138	119.5	5.97274	7	11	6	5	7.25	0.3878	0.238729	-4.04288	4.9501	-4.31879	1.74489e-13	5.5534e-12	[PF14931] Intraflagellar transport complex B, subunit 20; [PTHR31978] FAMILY NOT NAMED
Mapoly0055s0090	19	75	45	53	48	3.95595	0	2	0	0	0.5	0.0802462	0	-6.58491	2.43849	-6.69336	2.14013e-13	6.76667e-12	[PTHR11746] O-METHYLTRANSFERASE; [GO:0046983] protein dimerization activity; [GO:0008171] O-methyltransferase activity; [KOG3178] Hydroxyindole-O-methyltransferase and related SAM-dependent methyltransferases; [PF08100] Dimerisation domain; [PF00891] O-methyltransferase
Mapoly0060s0034	30	67	62	65	56	2.46734	4	1	2	3	2.5	0.0831959	0.101353	-4.48542	3.603	-4.80512	2.35822e-13	7.43186e-12
Mapoly0135s0049	596	779	624	698	674.25	36.2334	271	189	210	201	217.75	10.2982	10.0175	-1.63061	8.6105	-1.89874	2.52884e-13	7.94361e-12	[PTHR11746] O-METHYLTRANSFERASE; [GO:0005737] cytoplasm; [PF02545] Maf-like protein; [KOG1509] Predicted nucleic acid-binding protein ASMTL
Mapoly0047s0004	105	137	115	134	122.75	8.77288	3	16	3	6	7	0.646128	0.309152	-4.13222	4.97359	-4.26588	2.59113e-13	8.12603e-12	[GO:0055114] oxidation-reduction process; [K00430] peroxidase [EC:1.11.1.7]; [PF00141] Peroxidase; [GO:0020037] heme binding; [PTHR31235] FAMILY NOT NAMED; [1.11.1.7] Peroxidase.; [GO:0006979] response to oxidative stress; [GO:0004601] peroxidase activity
Mapoly3629s0001	19	32	16	34	25.25	2.20331	0	0	0	0	0	0	0	-20.4917	-15.2261	-20.9697	2.73502e-13	8.56338e-12
Mapoly0110s0048	26.7315	29	27	34	29.1829	1.02074	1	1	0	1	0.75	0.0347081	0.0216591	-5.28206	2.30326	-5.4563	2.77181e-13	8.66449e-12
Mapoly4395s0001	1342	1941	1430	1955	1667	166.323	51	193	89	274	151.75	11.3822	17.8759	-3.45749	9.0869	-3.57249	2.77755e-13	8.66839e-12
Mapoly0008s0187	242	443	375	374	358.5	10.5245	84	69	43	32	57	1.87128	0.963604	-2.65294	7.18957	-2.95756	3.31225e-13	1.02949e-11	[PTHR31183] FAMILY NOT NAMED
Mapoly0127s0033	44	71	129	57	75.25	6.88974	5	3	1	4	3.25	0.293243	0.224218	-4.53317	4.0371	-4.80283	3.31474e-13	1.02949e-11
Mapoly0059s0007	23	74	63	48	52	1.93329	0	2	2	1	1.25	0.0361875	0.0465762	-5.37849	3.09639	-5.61119	3.40874e-13	1.05698e-11
Mapoly0014s0212	33	132	102	113	95	5.55334	5	6	5	4	5	0.270928	0.227206	-4.24792	4.50909	-4.54374	3.41445e-13	1.05706e-11
Mapoly1497s0002	38	267	220	372	224.25	11.3007	1	7	2	7	4.25	0.184862	0.215744	-5.7215	5.10086	-5.88404	3.5754e-13	1.10511e-11
Mapoly0143s0009	57	105	101	68	82.75	5.41019	4	0	4	8	4	0.0927141	0.373713	-4.37068	4.25169	-4.60061	3.79745e-13	1.16999e-11
Mapoly0092s0056	57	121	91	115	96	5.49082	10	9	6	9	8.5	0.453877	0.397023	-3.4975	4.89688	-3.75486	4.01504e-13	1.23506e-11
Mapoly0170s0002	17	35	17	34	25.75	2.88037	1	0	0	0	0.25	0.0396972	0	-6.6864	1.24218	-7.24395	4.02792e-13	1.23705e-11
Mapoly0165s0028	14	37	36	24	27.75	3.42019	0	0	0	0	0	0	0	-20.6279	-15.2261	-21.1336	4.16831e-13	1.27813e-11
Mapoly0013s0008	38	63	67	56	56	1.61985	0	0	2	5	1.75	0	0.0975918	-4.99999	3.43513	-5.11747	4.18107e-13	1.28001e-11
Mapoly0030s0079	15	51	35	62	40.75	3.65136	0	1	0	0	0.25	0.043243	0	-7.34863	1.82611	-7.4686	4.26367e-13	1.30322e-11
Mapoly0013s0151	87	105	66	87	86.25	7.25523	6	9	0	7	5.5	0.565268	0.318779	-3.97102	4.52551	-4.10345	4.40328e-13	1.34377e-11
Mapoly0034s0021	78	174	147	142	135.25	5.88344	7	18	8	9	10.5	0.490771	0.3337	-3.68717	5.32003	-3.90138	5.03613e-13	1.53205e-11	[PTHR21074] UNCHARACTERIZED; [PTHR21074:SF0] SUBFAMILY NOT NAMED
Mapoly0127s0034	18	18	28	22	21.5	3.08028	0	0	0	0	0	0	0	-20.2598	-15.2261	-20.7467	5.13877e-13	1.55836e-11
Mapoly0005s0079	303	373	342	337	338.75	7.77574	26	65	20	39	37.5	1.05411	0.694208	-3.17526	6.89881	-3.33832	5.23328e-13	1.58452e-11	[PTHR22997] UNCHARACTERIZED; [PF08190] pre-RNA processing PIH1/Nop17
Mapoly0036s0121	73	111	124	90	99.5	1.25424	5	5	10	13	8.25	0.0534317	0.133392	-3.59223	4.9123	-3.81173	5.26917e-13	1.59289e-11
Mapoly0043s0087	89	159	133	131	128	5.65503	1	4	2	13	5	0.102896	0.336751	-4.67807	4.80448	-4.75145	5.44394e-13	1.64315e-11
Mapoly0098s0019	170	324	251	285	257.5	5.66032	48	24	60	35	41.75	0.521782	0.72667	-2.62472	6.71508	-2.95242	5.6125e-13	1.69138e-11
Mapoly0009s0057	1697	2502	1936	1938	2018.25	86.5355	46	341	65	100	138	8.00019	3.33746	-3.87036	9.14397	-3.9995	5.85525e-13	1.75904e-11	[PTHR18952] CARBONIC ANHYDRASE; [PF00194] Eukaryotic-type carbonic anhydrase; [KOG0382] Carbonic anhydrase
Mapoly0183s0008	59	86	76	69	72.5	4.90067	8	10	6	3	6.75	0.5292	0.259528	-3.42502	4.49943	-3.70067	6.21708e-13	1.86194e-11
Mapoly0172s0020	321	463	389	384	389.25	11.5622	74	80	103	84	85.25	2.03737	2.58281	-2.19093	7.55096	-2.44379	6.23748e-13	1.86515e-11
Mapoly0083s0083	22	16	17	24	19.75	1.32853	0	0	0	0	0	0	0	-20.1373	-15.2261	-20.5935	6.57579e-13	1.96327e-11
Mapoly0030s0018	16	51	39	54	40	5.13471	0	1	1	0	0.5	0.0621082	0.0466388	-6.32188	2.2183	-6.62442	7.37474e-13	2.19501e-11
Mapoly0073s0020	31	70	65	59	56.25	2.1278	1	3	3	4	2.75	0.0687111	0.120889	-4.35434	3.73252	-4.55361	7.852e-13	2.32987e-11	[GO:0003677] DNA binding; [PF00538] linker histone H1 and H5 family; [GO:0000786] nucleosome; [GO:0005634] nucleus; [GO:0006334] nucleosome assembly
Mapoly0001s0130	379	545	491	532	486.75	14.6655	86	138	78	69	92.75	2.98069	1.96311	-2.39176	7.78743	-2.62962	8.7557e-13	2.59005e-11	[PTHR13914] PROLINE OXIDASE; [K00318] proline dehydrogenase [EC:1.5.99.8]; [GO:0004657] proline dehydrogenase activity; [KOG0186] Proline oxidase; [PTHR13914:SF0] SUBFAMILY NOT NAMED; [PF01619] Proline dehydrogenase; [GO:0006562] proline catabolic process; [1.5.99.8] Proline dehydrogenase.
Mapoly0102s0043	39	62	43	38	45.5	4.49661	2	1	5	3	2.75	0.120611	0.345075	-4.04835	3.50026	-4.33366	1.06602e-12	3.14377e-11
Mapoly0189s0012	14	25	26	22	21.75	2.34076	1	0	0	0	0.25	0.0379304	0	-6.44285	1.12623	-7.01205	1.07874e-12	3.17643e-11
Mapoly0045s0069	18	31	34	22	26.25	1.41814	0	0	1	0	0.25	0	0.0199742	-6.71415	1.29595	-7.20615	1.08723e-12	3.19655e-11
Mapoly0035s0127	141	197	153	161	163	5.71427	14	28	17	22	20.25	0.666238	0.63647	-3.00888	5.91271	-3.19832	1.17286e-12	3.43784e-11
Mapoly0190s0013	13	34	22	27	24	3.67517	0	0	0	0	0	0	0	-20.4185	-15.2261	-20.9153	1.25358e-12	3.66887e-11
Mapoly0001s0496	583.34	763.581	750.112	759.326	714.09	18.0947	135.819	242.251	197.168	156.115	182.838	4.27059	3.96451	-1.96554	8.55288	-2.20038	1.3181e-12	3.85184e-11	[GO:0016020] membrane; [PTHR11654] OLIGOPEPTIDE TRANSPORTER-RELATED; [PF00854] POT family; [KOG1237] H+/oligopeptide symporter; [GO:0006810] transport; [GO:0005215] transporter activity
Mapoly0003s0054	20	46	33	24	30.75	4.91422	0	0	1	1	0.5	0	0.144186	-5.94247	2.04299	-6.15375	1.33006e-12	3.88091e-11
Mapoly0103s0057	45	70	40	35	47.5	2.4302	4	1	5	3	3.25	0.100185	0.180318	-3.86941	3.62691	-4.17746	1.34085e-12	3.9065e-11
Mapoly0072s0059	22	43	42	29	34	10.8806	1	0	0	2	0.75	0.113102	0.337662	-5.50247	2.4432	-5.66008	1.43212e-12	4.15985e-11
Mapoly0016s0062	10	83	32	51	44	8.70581	0	0	0	0	0	0	0	-21.2929	-15.2261	-21.8061	1.48823e-12	4.3163e-11	[GO:0016161] beta-amylase activity; [GO:0000272] polysaccharide catabolic process; [PF01373] Glycosyl hydrolase family 14
Mapoly0089s0017	38	30	12	23	25.75	1.03634	0	0	0	1	0.25	0	0.022542	-6.6864	1.48951	-6.58749	1.54648e-12	4.47853e-11	[GO:0055114] oxidation-reduction process; [PF00141] Peroxidase; [GO:0020037] heme binding; [PTHR31235] FAMILY NOT NAMED; [GO:0006979] response to oxidative stress; [GO:0004601] peroxidase activity
Mapoly0009s0089	295	577	419	580	467.75	31.5441	103	62	120	97	95.5	4.50637	6.43281	-2.29216	7.76024	-2.59082	1.57104e-12	4.54284e-11
Mapoly0088s0048	109.468	108.265	86.5401	86.3429	97.654	6.6859	9.11501	17.0838	16.1381	11.1517	13.3722	0.821324	0.836793	-2.86845	5.21104	-3.07566	1.7328e-12	5.00307e-11
Mapoly0054s0041	28	70	46	59	50.75	2.82653	1	1	5	2	2.25	0.0677227	0.232502	-4.4954	3.44237	-4.82543	1.75323e-12	5.05448e-11
Mapoly0079s0048	16	49	23	42	32.5	4.08663	0	1	0	0	0.25	0.0683027	0	-7.02227	1.65237	-7.12112	1.77949e-12	5.12254e-11
Mapoly0161s0031	14	20	24	29	21.75	1.69709	0	0	0	0	0	0	0	-20.2765	-15.2261	-20.7791	1.84091e-12	5.29145e-11
Mapoly0121s0005	73	82	109	64	82	1.21396	4	10	0	1	3.75	0.0948214	0.00789827	-4.45066	4.21107	-4.63219	2.01287e-12	5.77712e-11	[KOG4224] Armadillo repeat protein VAC8 required for vacuole fusion, inheritance and cytosol-to-vacuole protein targeting; [PTHR23315] BETA CATENIN-RELATED ARMADILLO REPEAT-CONTAINING
Mapoly0002s0155	51	92	87	111	85.25	3.63903	2	10	2	2	4	0.23845	0.0760274	-4.41362	4.30877	-4.59934	2.40626e-12	6.89591e-11	[PF13920] Zinc finger, C3HC4 type (RING finger)
Mapoly0060s0042	18	47	31	46	35.5	2.73039	0	1	1	1	0.75	0.0375415	0.068447	-5.56475	2.46983	-5.75124	2.41755e-12	6.91799e-11
Mapoly0073s0048	69	201	163	178	152.75	6.88863	15	19	11	13	14.5	0.65253	0.48652	-3.39705	5.62686	-3.66195	2.46913e-12	7.05512e-11
Mapoly0535s0001	51	64	40	60	53.75	6.89772	1	0	8	0	2.25	0.0463128	0.387303	-4.57826	3.37839	-5.04697	2.55467e-12	7.28873e-11	[PF03330] Rare lipoprotein A (RlpA)-like double-psi beta-barrel; [GO:0008061] chitin binding; [PTHR22595] CHITINASE-RELATED; [PF00187] Chitin recognition protein
Mapoly0041s0152	15	44	18	23	25	5.15038	0	0	0	0	0	0	0	-20.4774	-15.2261	-20.9566	2.5829e-12	7.34754e-11	[GO:0005515] protein binding; [PF00646] F-box domain
Mapoly0009s0014	73	214	181	216	171	20.6624	9	22	8	6	11.25	1.66616	0.728228	-3.926	5.53729	-4.17543	2.59063e-12	7.35867e-11
Mapoly0032s0148	24	39	26	26	28.75	1.54095	1	0	0	2	0.75	0.0192516	0.0574749	-5.2605	2.31008	-5.39384	2.66092e-12	7.54723e-11
Mapoly0002s0032	12	23	52	44	32.75	2.61262	0	0	0	0	0	0	0	-20.8669	-15.2261	-21.4069	2.76768e-12	7.83852e-11	[PF13837] Myb/SANT-like DNA-binding domain
Mapoly0164s0025	9	48	33	52	35.5	4.93115	0	0	0	0	0	0	0	-20.9833	-15.2261	-21.511	2.78711e-12	7.88195e-11
Mapoly0047s0032	18	40	25	20	25.75	2.34143	0	1	0	0	0.25	0.045221	0	-6.6864	1.47412	-6.76462	2.90133e-12	8.19297e-11
Mapoly0104s0005	40	149	103	96	97	14.3485	5	9	6	1	5.25	0.907104	0.401827	-4.20759	4.54011	-4.51995	2.95194e-12	8.32369e-11	[PF14215] bHLH-MYC and R2R3-MYB transcription factors N-terminal; [PTHR13902:SF23] PREDICTED: HYPOTHETICAL PROTEIN; [PTHR13902] SERINE/THREONINE-PROTEIN KINASE WNK (WITH NO LYSINE)-RELATED
Mapoly0062s0037	233	773	469	631	526.5	36.9281	118	18	76	36	62	3.52416	3.27087	-3.08609	7.48491	-3.50677	3.13737e-12	8.83365e-11	[PF09764] N-terminal glutamine amidase; [KOG3261] Uncharacterized conserved protein; [PTHR13035] UNCHARACTERIZED; [PTHR13035:SF0] SUBFAMILY NOT NAMED; [GO:0016811] hydrolase activity, acting on carbon-nitrogen (but not peptide) bonds, in linear amides
Mapoly0006s0170	111	304	252	232	224.75	7.50217	8	6	40	8	15.5	0.191251	0.628704	-3.85798	5.88293	-4.2542	3.18211e-12	8.94654e-11
Mapoly0105s0034	12	43	39	41	33.75	2.58685	0	0	0	1	0.25	0	0.039629	-7.07672	1.74341	-7.0953	3.27896e-12	9.20543e-11
Mapoly0074s0048	70	93	68	68	74.75	8.72763	2	8	11	7	7	0.557838	0.932025	-3.41664	4.5659	-3.62515	3.46517e-12	9.70458e-11	[PF07802] GCK domain
Mapoly0076s0070	18	30	28	28	26	1.72377	1	0	0	1	0.5	0.023455	0.0350119	-5.70039	1.91019	-5.94738	3.46682e-12	9.70458e-11
Mapoly2023s0001	463	1117	858	1271	927.25	29.0983	11	95	37	85	57	1.58071	1.83531	-4.02392	7.97283	-4.16873	3.47711e-12	9.71928e-11
Mapoly0011s0036	364	570	424	437	448.75	8.93357	151	103	111	46	102.75	2.09708	1.31573	-2.12677	7.75052	-2.4522	3.48749e-12	9.73419e-11	[GO:0015299] solute:hydrogen antiporter activity; [GO:0016021] integral to membrane; [KOG1650] Predicted K+/H+-antiporter; [GO:0055085] transmembrane transport; [PTHR32468:SF0] SUBFAMILY NOT NAMED; [GO:0006812] cation transport; [PTHR32468] FAMILY NOT NAMED; [PF00999] Sodium/hydrogen exchanger family
Mapoly0095s0039	139.619	331.873	234.727	230	234.055	2.62632	26.3166	44.6048	24.5344	15	27.614	0.350716	0.190563	-3.08338	6.38325	-3.34432	3.57904e-12	9.97529e-11
Mapoly3773s0001	61	60	29	35	46.25	4.21123	1	0	3	5	2.25	0.0338614	0.35892	-4.36145	3.39948	-4.4849	3.61896e-12	1.0072e-10
Mapoly0105s0048	292	625	395	649	490.25	21.6325	79	84	95	104	90.5	3.05035	3.95754	-2.43753	7.78016	-2.68995	3.8036e-12	1.05706e-10	[PF03417] Acyl-coenzyme A:6-aminopenicillanic acid acyl-transferase
Mapoly0199s0011	949	1312	1097	1486	1211	39.8988	71	298	88	158	153.75	5.69257	3.84133	-2.97754	8.85151	-3.13112	3.9331e-12	1.09148e-10
Mapoly0014s0161	238	506	464	452	415	13.9632	105	89	84	46	81	2.70552	1.84952	-2.35712	7.5504	-2.6807	4.54914e-12	1.26062e-10	[PTHR23029] PHOSPHOGLYCERATE MUTASE; [KOG0235] Phosphoglycerate mutase; [PF00300] Histidine phosphatase superfamily (branch 1)
Mapoly0023s0015	556	722	615	770	665.75	16.622	28	135	56	92	77.75	1.93378	1.7599	-3.09807	7.92631	-3.24486	4.72749e-12	1.30816e-10	[GO:0016567] protein ubiquitination; [GO:0005515] protein binding; [PF13414] TPR repeat; [GO:0004842] ubiquitin-protein ligase activity; [PF00515] Tetratricopeptide repeat; [PF04564] U-box domain; [PTHR22904] TPR REPEAT CONTAINING PROTEIN
Mapoly0081s0044	17	30	22	20	22.25	1.70486	0	0	0	1	0.25	0	0.0408594	-6.47564	1.42056	-6.44959	4.89192e-12	1.35173e-10
Mapoly0180s0010	630	836	557	690	678.25	24.5428	265	224	223	93	201.25	7.528	4.85405	-1.75283	8.53536	-2.05062	4.99106e-12	1.37715e-10	[PTHR13105:SF7] PREDICTED PROTEIN; [PF10248] Myelodysplasia-myeloid leukemia factor 1-interacting protein; [PTHR13105] MYELOID LEUKEMIA FACTOR
Mapoly0094s0072	276	384	429	339	357	9.84025	86	36	49	81	63	1.33231	1.68486	-2.5025	7.27298	-2.77046	5.0724e-12	1.39759e-10	[KOG0645] WD40 repeat protein; [GO:0005515] protein binding; [PTHR22847] WD40 REPEAT PROTEIN; [PF00400] WD domain, G-beta repeat
Mapoly0108s0011	125	222	206	214	191.75	1.03417	30	31	42	25	32	0.139193	0.154546	-2.58308	6.33067	-2.87964	5.21302e-12	1.43224e-10	[PF12774] Hydrolytic ATP binding site of dynein motor region D1; [PF12780] P-loop containing dynein motor region D4; [GO:0005524] ATP binding; [K10414] dynein heavy chain 2, cytosolic; [PF12775] P-loop containing dynein motor region D3; [GO:0030286] dynein complex; [PTHR10676:SF34] CYTOPLASMIC DYNEIN 2 HEAVY CHAIN 1; [PTHR10676] DYNEIN HEAVY CHAIN FAMILY PROTEIN; [PF08385] Dynein heavy chain, N-t…
Mapoly0223s0006	12	37	18	35	25.5	3.52583	0	0	0	0	0	0	0	-20.5059	-15.2261	-21.0075	5.30667e-12	1.4559e-10	[GO:0016020] membrane; [PTHR19139] AQUAPORIN TRANSPORTER; [GO:0006810] transport; [KOG0223] Aquaporin (major intrinsic protein family); [GO:0005215] transporter activity; [PF00230] Major intrinsic protein
Mapoly0143s0001	35	128	87	112	90.5	8.39725	7	4	5	8	6	0.406212	0.554895	-3.91488	4.60972	-4.19163	5.31919e-12	1.45726e-10	[KOG0698] Serine/threonine protein phosphatase; [PTHR13832] PROTEIN PHOSPHATASE 2C; [PF00481] Protein phosphatase 2C; [GO:0003824] catalytic activity
Mapoly0027s0003	11	36	22	27	24	1.28805	0	0	0	0	0	0	0	-20.4185	-15.2261	-20.9212	5.33866e-12	1.46052e-10	[GO:0042393] histone binding; [PF02182] SAD/SRA domain
Mapoly0071s0106	99	260	195	218	193	4.75021	32	23	26	6	21.75	0.497932	0.295971	-3.14951	6.02721	-3.52117	5.40933e-12	1.47776e-10
Mapoly0074s0085	8	54	34	46	35.5	1.10088	0	0	0	0	0	0	0	-20.9833	-15.2261	-21.509	5.42706e-12	1.48051e-10
Mapoly1337s0001	16	50	26	39	32.75	9.36783	1	0	0	1	0.5	0.100637	0.150224	-6.03337	2.08044	-6.28789	5.55324e-12	1.51279e-10
Mapoly0081s0033	13	80	17	50	40	1.18816	0	0	0	0	0	0	0	-21.1554	-15.2261	-21.6534	5.74892e-12	1.56388e-10
Mapoly0001s0172	45	170	96	123	108.5	4.60989	7	8	3	9	6.75	0.269899	0.246595	-4.00666	4.8474	-4.22395	5.87044e-12	1.59245e-10
Mapoly0575s0001	28	79	77	71	63.75	3.50201	7	0	2	0	2.25	0.133854	0.0399783	-4.82442	3.50412	-5.39504	6.1413e-12	1.66358e-10	[PTHR31549] FAMILY NOT NAMED; [PF03140] Plant protein of unknown function
Mapoly0018s0028	22	59	56	41	44.5	2.5894	2	0	2	3	1.75	0.0407427	0.133817	-4.66836	3.19772	-4.95507	6.21039e-12	1.67994e-10	[GO:0005515] protein binding; [PF00646] F-box domain
Mapoly0250s0001	8	68	30	86	48	2.05822	0	0	0	0	0	0	0	-21.4185	-15.2261	-21.9508	6.25173e-12	1.68876e-10
Mapoly0008s0113	24	32	33	12	25.25	4.34814	0	1	0	0	0.25	0.0865856	0	-6.65811	1.45255	-6.72148	6.4808e-12	1.74818e-10
Mapoly0070s0013	232	325	208	251	254	9.42721	75	17	46	38	44	1.32069	1.40294	-2.52925	6.71674	-2.85418	6.64454e-12	1.78985e-10	[PF13650] Aspartyl protease
Mapoly0190s0003	39	83	53	101	69	5.40114	7	5	2	0	3.5	0.38377	0.0574731	-4.30116	3.96238	-4.67776	6.74144e-12	1.81342e-10
Mapoly0050s0031	12	29	18	23	20.5	1.23723	0	0	0	0	0	0	0	-20.1911	-15.2261	-20.6833	7.4872e-12	2.01122e-10	[PTHR32133] FAMILY NOT NAMED; [GO:0005515] protein binding; [PF00646] F-box domain
Mapoly0027s0006	366	386	297	471	380	16.0827	5	55	19	25	26	1.24199	0.870685	-3.86942	6.73083	-3.9937	7.59118e-12	2.03632e-10
Mapoly0165s0027	9	45	28	33	28.75	1.64131	0	0	0	0	0	0	0	-20.679	-15.2261	-21.1948	7.73028e-12	2.07075e-10
Mapoly0032s0154	34	76	82	62	63.5	2.87509	7	2	5	5	4.75	0.15508	0.201145	-3.74075	4.14955	-4.07718	8.33104e-12	2.2255e-10
Mapoly0134s0016	9	30	32	38	27.25	2.06188	0	0	0	0	0	0	0	-20.6017	-15.2261	-21.1308	9.06046e-12	2.41033e-10
Mapoly0115s0002	296	357	272	320	311.25	5.35914	41	86	44	34	51.25	0.997586	0.60052	-2.60245	7.03227	-2.81071	9.22451e-12	2.45059e-10
Mapoly0266s0002	11	36	27	19	23.25	2.29213	0	0	0	0	0	0	0	-20.3727	-15.2261	-20.8742	9.52481e-12	2.52689e-10	[GO:0006355] regulation of transcription, DNA-dependent; [PF02671] Paired amphipathic helix repeat; [PTHR12346] SIN3B-RELATED; [GO:0005634] nucleus; [KOG4204] Histone deacetylase complex, SIN3 component
Mapoly0094s0062	494	628	386	539	511.75	12.3023	189	122	188	142	160.25	3.11941	3.55111	-1.67511	8.17722	-1.94598	1.08159e-11	2.86154e-10	[PF14816] Family of unknown function, FAM178
Mapoly0019s0049	13	24	15	22	18.5	1.97461	0	0	0	0	0	0	0	-20.043	-15.2261	-20.5263	1.1898e-11	3.1435e-10
Mapoly0002s0202	75	140	116	122	113.25	6.37949	15	8	13	19	13.75	0.497073	0.843183	-3.04201	5.35819	-3.29766	1.1972e-11	3.15875e-10	[GO:0005515] protein binding; [PF00043] Glutathione S-transferase, C-terminal domain; [PF02798] Glutathione S-transferase, N-terminal domain; [KOG0867] Glutathione S-transferase; [PTHR11260] GLUTATHIONE S-TRANSFERASE, GST, SUPERFAMILY, GST DOMAIN CONTAINING
Mapoly0239s0003	12	21	31	19	20.75	1.43309	0	0	0	0	0	0	0	-20.2086	-15.2261	-20.7177	1.19926e-11	3.15985e-10
Mapoly0019s0027	24	43	44	45	39	3.43083	2	2	4	1	2.25	0.147895	0.175407	-4.11547	3.24347	-4.4701	1.27886e-11	3.36041e-10
Mapoly1185s0001	11	36	23	19	22.25	5.86653	0	0	0	0	0	0	0	-20.3092	-15.2261	-20.8056	1.33146e-11	3.49382e-10	[PTHR31301] FAMILY NOT NAMED; [PF03195] Protein of unknown function DUF260
Mapoly0073s0053	15	28	21	21	21.25	1.719	0	0	1	0	0.25	0	0.0300618	-6.40929	1.13938	-6.89302	1.33326e-11	3.49382e-10
Mapoly0125s0007	14	38	25	38	28.75	2.26707	1	0	1	1	0.75	0.0276087	0.0700731	-5.2605	2.24399	-5.59852	1.38911e-11	3.63525e-10
Mapoly0021s0053	14	36	32	33	28.75	2.93371	2	0	0	1	0.75	0.0713117	0.0532246	-5.2605	2.23525	-5.62343	1.39253e-11	3.63927e-10
Mapoly0132s0047	55.2987	91.259	87.3307	77.564	77.8631	2.14262	10.2892	6.85816	16.4069	5.41096	9.74131	0.19342	0.245994	-2.99875	4.79003	-3.34843	1.46839e-11	3.83232e-10	[GO:0016020] membrane; [PF03254] Xyloglucan fucosyltransferase; [GO:0042546] cell wall biogenesis; [GO:0008107] galactoside 2-alpha-L-fucosyltransferase activity; [PTHR31889] FAMILY NOT NAMED
Mapoly0006s0100	52	76	79	77	71	2.02865	14	3	7	7	7.75	0.183896	0.179751	-3.19555	4.56006	-3.54361	1.49905e-11	3.90706e-10
Mapoly0409s0001	23	72	55	86	59	2.12723	5	3	1	2	2.75	0.114777	0.0504176	-4.4232	3.71769	-4.75176	1.53154e-11	3.98634e-10
Mapoly0027s0155	14	22	42	31	27.25	1.5425	0	0	1	0	0.25	0	0.020495	-6.76809	1.33795	-7.29016	1.56233e-11	4.06101e-10
Mapoly0015s0175	34	75	48	41	49.5	3.66204	7	3	3	1	3.5	0.294869	0.122124	-3.822	3.70211	-4.19916	1.56752e-11	4.069e-10
Mapoly0090s0019	146.995	229	151	179	176.499	3.35786	9.99493	15.9964	17	32.9966	18.997	0.222395	0.462019	-3.21581	5.93978	-3.37381	1.60075e-11	4.14968e-10
Mapoly0114s0008	26	77	111	92	76.5	4.92155	8	4	3	2	4.25	0.300075	0.135382	-4.16992	4.20101	-4.56399	1.74062e-11	4.50621e-10
Mapoly0023s0126	13	22	14	24	18.25	1.2978	0	0	0	0	0	0	0	-20.0233	-15.2261	-20.5082	1.75807e-11	4.54529e-10
Mapoly0120s0044	33	22	33	24	28	1.58285	1	3	0	0	1	0.106294	0	-4.80733	2.47011	-4.96509	1.8276e-11	4.71873e-10	[PTHR22731] RIBONUCLEASE P/MRP SUBUNIT
Mapoly0010s0020	54	108	58	91	77.75	1.08192	1	8	5	7	5.25	0.0609556	0.0787333	-3.88845	4.43548	-4.03825	1.87456e-11	4.82705e-10	[PTHR21715] UNCHARACTERIZED; [PF00397] WW domain; [GO:0005515] protein binding; [PTHR21715:SF0] SUBFAMILY NOT NAMED
Mapoly0041s0088	21	68	55	72	54	2.40011	0	4	0	2	1.5	0.0859148	0.0460635	-5.16991	3.3388	-5.25307	1.90759e-11	4.90557e-10
Mapoly0006s0013	68	298	200	289	213.75	7.2542	12	11	16	26	16.25	0.321202	0.653117	-3.71741	5.97248	-3.96052	1.95175e-11	5.01245e-10
Mapoly0058s0073	175	561	416	477	407.25	7.5806	80	49	71	73	68.25	0.964075	1.20227	-2.57701	7.43265	-2.88	1.99893e-11	5.12678e-10	[PF00225] Kinesin motor domain; [GO:0005524] ATP binding; [PTHR24115] FAMILY NOT NAMED; [GO:0005871] kinesin complex; [GO:0007018] microtubule-based movement; [GO:0008017] microtubule binding; [GO:0003777] microtubule motor activity
Mapoly0031s0119	152	355	265	275	261.75	10.3193	51	52	29	34	41.5	1.71538	1.12703	-2.65701	6.75742	-2.92572	2.14234e-11	5.48001e-10
Mapoly0039s0067	12	23	26	15	19	1.36161	0	0	0	0	0	0	0	-20.0814	-15.2261	-20.5784	2.26941e-11	5.79738e-10
Mapoly0015s0111	38	51	48	40	44.25	3.56252	3	3	5	5	4	0.206837	0.365769	-3.4676	3.78341	-3.70143	2.30655e-11	5.88444e-10
Mapoly0001s0509	34	43	47	34	39.5	4.77994	3	3	3	4	3.25	0.310421	0.393939	-3.60333	3.55882	-3.82789	2.35844e-11	6.00095e-10
Mapoly0011s0196	51	140	75	115	95.25	3.89314	8	9	0	6	5.75	0.302323	0.131902	-4.05008	4.63026	-4.26253	2.42063e-11	6.15108e-10
Mapoly0008s0136	75	49	42	48	53.5	5.38621	1	7	1	5	3.5	0.401	0.317568	-3.93411	3.87016	-3.97241	2.50774e-11	6.36404e-10
Mapoly0075s0068	205	321	327	382	308.75	5.81315	44	65	81	46	59	0.89582	1.01514	-2.38765	7.12469	-2.67045	2.56122e-11	6.47422e-10
Mapoly0062s0053	16	47	25	58	36.5	1.00775	3	0	0	0	0.75	0.0288889	0	-5.60483	2.2987	-6.18707	2.67608e-11	6.75571e-10
Mapoly0076s0019	56	81	78	85	75	7.45864	5	13	8	4	7.5	0.814455	0.505441	-3.32193	4.62695	-3.5635	2.79891e-11	7.05655e-10	[KOG0620] Glucose-repressible alcohol dehydrogenase transcriptional effector CCR4 and related proteins; [PF03372] Endonuclease/Exonuclease/phosphatase family; [PTHR12121] CARBON CATABOLITE REPRESSOR PROTEIN 4
Mapoly0056s0088	65	70	70	68	68.25	2.53645	8	3	14	9	8.5	0.162645	0.37494	-3.00529	4.60292	-3.30034	2.8204e-11	7.10143e-10
Mapoly0002s0179	4789	4757	4158	4442	4536.5	90.4498	1034	1921	1025	1463	1360.75	26.7309	23.652	-1.73718	11.3399	-1.91128	2.85299e-11	7.16479e-10	[GO:0055114] oxidation-reduction process; [KOG1186] Copper amine oxidase; [GO:0005507] copper ion binding; [1.4.3.21] Primary-amine oxidase.; [PTHR10638] COPPER AMINE OXIDASE; [PF02727] Copper amine oxidase, N2 domain; [PF02728] Copper amine oxidase, N3 domain; [K00276] primary-amine oxidase [EC:1.4.3.21]; [GO:0008131] primary amine oxidase activity; [GO:0048038] quinone binding; [GO:0009308] ami…
Mapoly0034s0110	44	69	54	32	49.75	1.32701	4	6	5	3	4.5	0.118815	0.0933493	-3.46669	3.93809	-3.71048	2.86799e-11	7.1931e-10
Mapoly0078s0018	115	154	117	155	135.25	3.5347	22	16	23	28	22.25	0.414015	0.615689	-2.60375	5.82434	-2.84288	2.97788e-11	7.459e-10	[PTHR11005] LYSOSOMAL ACID LIPASE-RELATED; [PF04083] Partial alpha/beta-hydrolase lipase region; [KOG2624] Triglyceride lipase-cholesterol esterase; [PF12697] Alpha/beta hydrolase family; [GO:0006629] lipid metabolic process
Mapoly0039s0038	169	115	225	103	153	2.65195	35	20	27	9	22.75	0.393018	0.26054	-2.74959	5.8708	-3.08535	2.98908e-11	7.47735e-10	[GO:0005506] iron ion binding; [KOG0156] Cytochrome P450 CYP2 subfamily; [GO:0055114] oxidation-reduction process; [GO:0016705] oxidoreductase activity, acting on paired donors, with incorporation or reduction of molecular oxygen; [GO:0020037] heme binding; [PTHR24298] FAMILY NOT NAMED; [PF00067] Cytochrome P450
Mapoly0022s0026	29	45	53	40	41.75	1.02891	6	3	1	0	2.5	0.0885542	0.00909668	-4.06177	3.33882	-4.46338	3.20216e-11	7.98965e-10
Mapoly0013s0071	16	28	21	24	22.25	3.79269	1	0	0	1	0.5	0.060578	0.0904266	-5.47569	1.79444	-5.71587	3.23405e-11	8.05879e-10	[GO:0005506] iron ion binding; [GO:0055114] oxidation-reduction process; [GO:0016705] oxidoreductase activity, acting on paired donors, with incorporation or reduction of molecular oxygen; [GO:0020037] heme binding; [PF00067] Cytochrome P450; [PTHR24286] FAMILY NOT NAMED
Mapoly0061s0083	82	105	104	114	101.25	1.24844	11	19	16	13	14.75	0.164315	0.158531	-2.77913	5.3286	-3.01563	3.30768e-11	8.22102e-10	[GO:0016020] membrane; [GO:0005524] ATP binding; [PF08370] Plant PDR ABC transporter associated; [GO:0016887] ATPase activity; [PTHR19241] ATP-BINDING CASSETTE TRANSPORTER; [PF01061] ABC-2 type transporter; [PF14510] ABC-transporter extracellular N-terminal; [KOG0065] Pleiotropic drug resistance proteins (PDR1-15), ABC superfamily; [PF00005] ABC transporter
Mapoly0005s0082	315	512	468	462	439.25	13.1828	146	106	142	97	122.75	3.12331	3.11985	-1.83932	7.88825	-2.14226	3.40205e-11	8.42301e-10
Mapoly0088s0050	20	15	10	28	18.25	1.57265	0	0	0	0	0	0	0	-20.0233	-15.2261	-20.4788	3.5274e-11	8.72218e-10
Mapoly0025s0097	40	80	107	66	73.25	3.36458	6	9	8	3	6.5	0.297369	0.206087	-3.49431	4.49432	-3.80617	3.61517e-11	8.90523e-10
Mapoly0030s0076	57	108	98	106	92.25	2.37564	10	12	17	10	12.25	0.242112	0.296448	-2.91277	5.11547	-3.20476	3.61599e-11	8.90523e-10	[PTHR32227] FAMILY NOT NAMED; [GO:0004553] hydrolase activity, hydrolyzing O-glycosyl compounds; [GO:0005975] carbohydrate metabolic process; [PTHR32227:SF20] SUBFAMILY NOT NAMED; [PF07983] X8 domain; [PF00332] Glycosyl hydrolases family 17
Mapoly0068s0004	293	926.52	593	875.315	671.959	8.36016	10	82.8409	13	34	34.9602	0.544631	0.279625	-4.26459	7.38878	-4.40943	3.6199e-11	8.90523e-10	[GO:0004114] 3',5'-cyclic-nucleotide phosphodiesterase activity; [GO:0035556] intracellular signal transduction; [PF00233] 3'5'-cyclic nucleotide phosphodiesterase; [GO:0007165] signal transduction; [GO:0009190] cyclic nucleotide biosynthetic process; [GO:0016849] phosphorus-oxygen lyase activity; [PTHR11347] CYCLIC NUCLEOTIDE PHOSPHODIESTERASE; [PF00211] Adenylate and Guanylate cyclase catalytic…
Mapoly0031s0136	19	46	33	36	33.5	3.63223	2	0	4	0	1.5	0.0764278	0.159787	-4.48111	2.75451	-5.00098	3.64788e-11	8.96262e-10
Mapoly0099s0016	9	25	22	25	20.25	1.2598	0	0	0	0	0	0	0	-20.1734	-15.2261	-20.6866	3.69782e-11	9.07378e-10
Mapoly0008s0146	332	417	303	385	359.25	7.90783	77	80	110	95	90.5	1.49238	2.03454	-1.989	7.53258	-2.22821	3.93591e-11	9.64573e-10
Mapoly0099s0051	48	56	60	57	55.25	3.94735	0	7	7	4	4.5	0.248629	0.339049	-3.61797	4.05161	-3.81203	4.36249e-11	1.06505e-09
Mapoly0025s0117	30	55	38	67	47.5	1.69395	1	2	6	3	3	0.047565	0.135126	-3.98489	3.6205	-4.27389	4.41552e-11	1.07664e-09
Mapoly0060s0089	8	46	23	29	26.5	10.1651	0	0	0	0	0	0	0	-20.5614	-15.2261	-21.0726	4.45326e-11	1.08447e-09	[GO:0005506] iron ion binding; [GO:0055114] oxidation-reduction process; [GO:0016705] oxidoreductase activity, acting on paired donors, with incorporation or reduction of molecular oxygen; [GO:0020037] heme binding; [PTHR24298] FAMILY NOT NAMED; [PF00067] Cytochrome P450
Mapoly0003s0187	40	43	25	53	40.25	1.15741	3	1	4	4	3	0.0456094	0.105426	-3.74595	3.48321	-3.99926	4.56825e-11	1.11107e-09
Mapoly0037s0031	244.2	556.467	368.201	619.424	447.073	6.63804	84.0662	91.0264	98.0575	87.0573	90.0519	1.09031	1.20357	-2.31168	7.705	-2.58629	4.69824e-11	1.13981e-09	[PTHR21178] FAMILY NOT NAMED; [PTHR21178:SF8] SUBFAMILY NOT NAMED
Mapoly0067s0033	30	30	51	31	35.5	2.74961	4	3	0	1	2	0.224764	0.0410351	-4.14974	3.11009	-4.43865	4.88801e-11	1.18287e-09
Mapoly0021s0079	385	721	548	638	573	11.2766	249	131	190	116	171.5	3.00669	2.59134	-1.74033	8.307	-2.07387	4.9984e-11	1.20807e-09	[2.7.6.3] 2-amino-4-hydroxy-6-hydroxymethyldihydropteridine diphosphokinase.; [2.5.1.15] Dihydropteroate synthase.; [K13941] 2-amino-4-hydroxy-6-hydroxymethyldihydropteridine diphosphokinase / dihydropteroate synthase [EC:2.7.6.3 2.5.1.15]; [PTHR20941] FOLATE SYNTHESIS PROTEINS; [GO:0009396] folic acid-containing compound biosynthetic process; [GO:0042558] pteridine-containing compound metabolic …
Mapoly0022s0140	10	24	20	17	17.75	1.37991	0	0	0	0	0	0	0	-19.9833	-15.2261	-20.4813	5.34681e-11	1.28583e-09
Mapoly0002s0065	22	54	44	23	35.75	2.17694	4	0	0	1	1.25	0.0863716	0.0322324	-4.83792	2.70926	-5.26435	5.36044e-11	1.28751e-09	[PTHR11746] O-METHYLTRANSFERASE; [GO:0046983] protein dimerization activity; [GO:0008171] O-methyltransferase activity; [KOG3178] Hydroxyindole-O-methyltransferase and related SAM-dependent methyltransferases; [PF08100] Dimerisation domain; [PF00891] O-methyltransferase
Mapoly0022s0148	499	1448	989	1251	1046.75	36.7817	349	282	357	220	302	9.12817	8.6361	-1.7933	9.17228	-2.11377	5.42178e-11	1.30062e-09	[PTHR23245] UNCHARACTERIZED; [PTHR23245:SF25] METHIONINE 10+ HOMOLOG; [PF02475] Met-10+ like-protein; [GO:0016740] transferase activity; [KOG2078] tRNA modification enzyme; [K07055] TatD-related deoxyribonuclease
Mapoly0202s0009	14	33	15	27	22.25	1.98013	0	0	1	0	0.25	0	0.0330343	-6.47564	1.17289	-6.96003	5.53494e-11	1.32447e-09
Mapoly0274s0002	10	19	21	19	17.25	1.77496	1	0	0	0	0.25	0.0238488	0	-6.10843	0.963042	-6.68567	5.56801e-11	1.33073e-09	[GO:0005524] ATP binding; [GO:0016021] integral to membrane; [PTHR24223] FAMILY NOT NAMED; [PF00664] ABC transporter transmembrane region; [GO:0006810] transport; [GO:0055085] transmembrane transport; [GO:0042626] ATPase activity, coupled to transmembrane movement of substances
Mapoly0044s0133	782.268	1068.96	944.686	1077.5	968.354	18.0963	253	393.891	235	287	292.223	5.33662	4.48914	-1.72847	9.11881	-1.9461	5.91315e-11	1.41147e-09
Mapoly0110s0017	125	169	164	194	163	4.75772	6	31	14	13	16	0.508994	0.352489	-3.34873	5.76215	-3.53094	6.04803e-11	1.43656e-09	[PF00150] Cellulase (glycosyl hydrolase family 5); [GO:0004553] hydrolase activity, hydrolyzing O-glycosyl compounds; [GO:0005975] carbohydrate metabolic process; [PTHR31451] FAMILY NOT NAMED
Mapoly0064s0098	173	213	216	232	208.5	6.99923	18	18	34	47	29.25	0.514886	1.26398	-2.83354	6.35704	-3.04001	6.43508e-11	1.52474e-09
Mapoly0131s0023	6	63	63	61	48.25	7.98463	2	0	0	0	0.5	0.112866	0	-6.59241	2.2249	-7.20938	6.45087e-11	1.5266e-09
Mapoly0028s0089	65	186	169	158	144.5	5.43601	2	14	0	6	5.5	0.282014	0.116065	-4.71549	4.96176	-4.83542	7.12352e-11	1.6796e-09	[KOG1375] Beta tubulin; [PF00091] Tubulin/FtsZ family, GTPase domain; [GO:0005874] microtubule; [K07375] tubulin beta; [PTHR11588] TUBULIN; [GO:0007017] microtubule-based process; [PF03953] Tubulin C-terminal domain; [GO:0006184] GTP catabolic process; [GO:0003924] GTPase activity; [GO:0051258] protein polymerization; [GO:0043234] protein complex; [GO:0005525] GTP binding
Mapoly0016s0096	10	27	35	30	25.5	1.79044	1	0	0	0	0.25	0.024256	0	-6.67233	1.25551	-7.27061	7.19039e-11	1.6933e-09	[GO:0003723] RNA binding; [GO:0003743] translation initiation factor activity; [PF01176] Translation initiation factor 1A / IF-1; [PTHR21668] EIF-1A; [GO:0006413] translational initiation
Mapoly0120s0034	15	51	39	38	35.75	19.0139	1	1	3	1	1.5	0.444198	0.859543	-4.57489	2.89845	-4.92866	7.24864e-11	1.70493e-09
Mapoly0035s0105	12	22	22	27	20.75	1.23458	0	0	1	0	0.25	0	0.0217811	-6.37494	1.13279	-6.87982	7.67572e-11	1.80099e-09
Mapoly0054s0080	201	589	544	544	469.5	12.5302	53	48	98	95	73.5	1.11274	2.26834	-2.67531	7.60568	-2.95381	8.18107e-11	1.90796e-09
Mapoly0108s0007	8	22	26	27	20.75	1.33443	0	0	0	0	0	0	0	-20.2086	-15.2261	-20.7339	8.29235e-11	1.93158e-09
Mapoly0083s0019	45	58	75	57	58.75	2.28872	4	3	7	9	5.75	0.11281	0.286322	-3.35295	4.26687	-3.58396	8.3892e-11	1.95178e-09
Mapoly0068s0075	23	41	44	65	43.25	2.15333	3	2	5	2	3	0.100316	0.142461	-3.84966	3.53441	-4.2112	8.4083e-11	1.95378e-09	[PTHR13253] FAMILY NOT NAMED; [PF00581] Rhodanese-like domain
Mapoly0173s0016	22.4077	72.8131	65.2318	76.0939	59.1366	3.03526	3.63569	4.17508	5.58962	1	3.6001	0.168088	0.130514	-4.03794	3.89443	-4.40876	8.50143e-11	1.97076e-09
Mapoly0034s0020	22	50	19	34	31.25	1.21685	0	3	0	0	0.75	0.0582175	0	-5.38079	2.40403	-5.45451	8.72482e-11	2.01769e-09
Mapoly0184s0001	18	15	10	13	14	1.97986	0	0	0	0	0	0	0	-19.6409	-15.2261	-20.0698	8.82342e-11	2.03805e-09
Mapoly0076s0050	17	35	11	27	22.5	1.5712	1	0	0	0	0.25	0.0280289	0	-6.49176	1.13639	-7.03236	9.2601e-11	2.13636e-09
Mapoly0025s0043	115	325	213	217	217.5	15.407	8	0	13	23	11	0.199733	1.19646	-4.30544	5.6901	-4.5278	9.81956e-11	2.26272e-09
Mapoly0158s0024	16	21	37	42	29	2.56641	0	0	3	0	0.75	0	0.0962478	-5.27299	2.17378	-5.79189	1.00172e-10	2.3055e-09
Mapoly0024s0014	42	133	89	145	102.25	5.48576	6	10	9	11	9	0.372021	0.482342	-3.50603	5.00854	-3.7469	1.0365e-10	2.38271e-09
Mapoly0037s0058	100.871	192.063	152.151	186.527	157.903	3.19215	19.3542	18.4408	14.0092	30.741	20.6363	0.336298	0.376811	-2.93578	5.915	-3.14822	1.05224e-10	2.41602e-09
Mapoly0164s0023	11	26	17	13	16.75	2.27725	0	0	0	0	0	0	0	-19.8996	-15.2261	-20.3813	1.0764e-10	2.46856e-09
Mapoly0030s0119	12	22	25	19	19.5	1.11323	0	0	1	0	0.25	0	0.0209776	-6.2853	1.08583	-6.78592	1.09113e-10	2.49935e-09
Mapoly2879s0001	21	75	53	75	56	6.91304	1	1	5	4	2.75	0.102606	0.480313	-4.34791	3.70135	-4.62996	1.12246e-10	2.56808e-09
Mapoly0003s0139	15	17	14	10	14	1.02918	0	0	0	0	0	0	0	-19.6409	-15.2261	-20.09	1.13303e-10	2.58918e-09
Mapoly0174s0003	219	304	363	149	258.75	5.76751	36	19	66	44	41.25	0.497857	1.07364	-2.64909	6.71468	-2.94007	1.15766e-10	2.64233e-09
Mapoly0043s0086	7	58	35	42	35.5	3.25186	1	0	0	0	0.25	0.0316404	0	-7.14965	1.49411	-7.74779	1.21632e-10	2.77295e-09
Mapoly0035s0079	153	92	49	63	89.25	7.76166	14	13	12	11	12.5	1.06292	0.959172	-2.83592	5.0537	-3.00366	1.23215e-10	2.80573e-09
Mapoly0041s0121	478	639	468	546	532.75	19.3983	197	171	215	161	186	5.69511	6.08829	-1.51816	8.32562	-1.78277	1.31003e-10	2.97954e-09	[PTHR13989] REPLICATION PROTEIN A-RELATED; [GO:0003676] nucleic acid binding; [PF01336] OB-fold nucleic acid binding domain
Mapoly0045s0025	10	31	34	22	24.25	1.3604	0	0	0	1	0.25	0	0.0291101	-6.59982	1.50289	-6.61426	1.36952e-10	3.11117e-09	[PF05678] VQ motif
Mapoly0255s0002	120	115	71	73	94.75	3.30675	21	12	21	17	17.75	0.486368	0.610508	-2.41631	5.35815	-2.65511	1.41471e-10	3.21007e-09	[PTHR31479] FAMILY NOT NAMED
Mapoly0007s0133	10	20	23	14	16.75	2.19093	0	0	0	0	0	0	0	-19.8996	-15.2261	-20.4006	1.424e-10	3.22735e-09
Mapoly3701s0001	294	303	270	250	279.25	27.1199	106	78	76	43	75.75	7.55625	5.0579	-1.88224	7.18889	-2.1684	1.46855e-10	3.32441e-09
Mapoly0001s0247	10	25	13	20	17	1.40353	0	0	0	0	0	0	0	-19.921	-15.2261	-20.4104	1.4869e-10	3.36199e-09
Mapoly0023s0128	15	23	27	22	21.75	1.57913	0	2	0	0	0.5	0.0713215	0	-5.4429	1.86124	-5.53886	1.49992e-10	3.38746e-09
Mapoly0051s0107	157	437	347	306	311.75	11.5675	62	49	89	30	57.5	1.6959	1.79496	-2.43876	7.08362	-2.79194	1.50295e-10	3.39034e-09	[PF01926] 50S ribosome-binding GTPase; [GO:0005525] GTP binding
Mapoly0132s0036	8	28	22	18	19	2.03184	0	0	0	0	0	0	0	-20.0814	-15.2261	-20.5904	1.59341e-10	3.59019e-09
Mapoly0058s0106	6	30	28	35	24.75	3.37655	0	0	0	0	0	0	0	-20.4629	-15.2261	-20.9971	1.60693e-10	3.61644e-09
Mapoly0025s0109	12.0996	11.1462	21.9791	20.0538	16.3197	5.23423	0	0	0	0	0	0	0	-19.8621	-15.2261	-20.3636	1.70065e-10	3.8229e-09
Mapoly0001s0092	295	492	493	433	428.25	24.2849	149	115	138	73	118.75	6.19779	5.07767	-1.85053	7.84118	-2.17114	1.70912e-10	3.83745e-09	[PF06695] Putative small multi-drug export protein
Mapoly0031s0121	109	253	196	238	199	13.0407	44	3	16	16	19.75	1.10861	0.934485	-3.33284	5.96187	-3.73736	1.74827e-10	3.9208e-09
Mapoly0167s0014	16	32	21	28	24.25	1.93927	0	2	0	1	0.75	0.0789118	0.0423089	-5.01492	2.24624	-5.06796	1.78986e-10	4.00942e-09
Mapoly0161s0022	16	38	32	32	29.5	2.85918	2	2	2	0	1.5	0.189788	0.0674016	-4.29766	2.73959	-4.67538	1.84784e-10	4.12971e-09
Mapoly0021s0102	5	38	28	46	29.25	1.27994	0	0	0	0	0	0	0	-20.7039	-15.2261	-21.2415	2.18784e-10	4.88391e-09
Mapoly0115s0015	13	23	14	31	20.25	3.02079	0	1	0	0	0.25	0.0732251	0	-6.33975	1.30906	-6.4345	2.2178e-10	4.94505e-09
Mapoly0067s0011	25	40	62	57	46	1.8304	1	0	2	5	2	0.0138346	0.132181	-4.52355	3.37616	-4.71231	2.22433e-10	4.95388e-09
Mapoly0115s0036	330	417	262	548	389.25	4.78211	6	55	51	40	38	0.36245	0.496158	-3.35663	7.00157	-3.54052	2.25871e-10	5.02466e-09	[GO:0005524] ATP binding; [KOG0055] Multidrug/pheromone exporter, ABC superfamily; [GO:0016021] integral to membrane; [PF00664] ABC transporter transmembrane region; [GO:0016887] ATPase activity; [GO:0006810] transport; [GO:0055085] transmembrane transport; [GO:0042626] ATPase activity, coupled to transmembrane movement of substances; [PTHR24221] FAMILY NOT NAMED; [PF00005] ABC transporter
Mapoly0083s0068	52	49	39	47	46.75	1.54471	4	9	6	2	5.25	0.198768	0.111328	-3.15457	3.99821	-3.38073	2.31439e-10	5.14258e-09
Mapoly0304s0003	260	406	247	335	312	14.4001	22	31	3	0	14	1.07885	0.051928	-4.47805	6.07931	-4.73731	2.31979e-10	5.14865e-09
Mapoly0013s0051	7	28	22	20	19.25	3.47479	0	0	0	0	0	0	0	-20.1003	-15.2261	-20.6154	2.55451e-10	5.66309e-09	[GO:0009058] biosynthetic process; [GO:0030170] pyridoxal phosphate binding; [PF00155] Aminotransferase class I and II; [PTHR11751] SUBGROUP I AMINOTRANSFERASE RELATED
Mapoly0010s0142	540	379	286	314	379.75	26.495	6	61	24	5	24	2.35974	0.844889	-3.98394	6.62239	-4.11286	2.5961e-10	5.74209e-09	[KOG0710] Molecular chaperone (small heat-shock protein Hsp26/Hsp42); [PTHR11527] SMALL HEAT-SHOCK PROTEIN (HSP20) FAMILY; [PF00011] Hsp20/alpha crystallin family
Mapoly0081s0055	15	24.1138	35	27.9402	25.5135	1.05432	1.00338	2	0	0	0.750845	0.0546772	0	-5.08657	2.20637	-5.33809	2.63623e-10	5.82416e-09
Mapoly0178s0022	426	663	570	798	614.25	8.05031	43	160	93	111	101.75	1.23533	1.20867	-2.5938	8.05603	-2.78238	2.68177e-10	5.90449e-09	[PF00072] Response regulator receiver domain; [GO:0035556] intracellular signal transduction; [PTHR16305] TESTICULAR SOLUBLE ADENYLYL CYCLASE; [GO:0000160] phosphorelay signal transduction system; [GO:0009190] cyclic nucleotide biosynthetic process; [GO:0016849] phosphorus-oxygen lyase activity; [PF00211] Adenylate and Guanylate cyclase catalytic domain
Mapoly0089s0066	13	14	10	17	13.5	1.08334	0	0	0	0	0	0	0	-19.5884	-15.2261	-20.0524	2.83114e-10	6.22625e-09
Mapoly0023s0069	1766	5841	4480	5905	4498	203.869	141	772	459	670	510.5	19.15	23.3128	-3.1393	10.6794	-3.3288	2.87738e-10	6.32073e-09	[GO:0006308] DNA catabolic process; [PF02265] S1/P1 Nuclease; [GO:0003676] nucleic acid binding; [GO:0004519] endonuclease activity
Mapoly0037s0146	40	103	83	98	81	3.21226	16	8	6	7	9.25	0.376443	0.231959	-3.13039	4.80684	-3.46525	2.88551e-10	6.33138e-09	[PF13837] Myb/SANT-like DNA-binding domain
Mapoly0144s0026	116	348	317	329	277.5	31.9773	60	28	40	50	44.5	3.9661	4.66623	-2.64061	6.84799	-2.95375	2.93006e-10	6.42182e-09
Mapoly0004s0209	19	70	21	52	40.5	4.69131	4	0	2	1	1.75	0.163616	0.146576	-4.53248	3.03492	-4.97986	3.02391e-10	6.61999e-09
Mapoly0043s0092	11	28	17	45	25.25	1.32096	0	1	0	0	0.25	0.0252949	0	-6.65811	1.47896	-6.77431	3.03327e-10	6.63296e-09
Mapoly0638s0001	18	42	40	52	38	1.15795	1	4	0	1	1.5	0.0696511	0.0158291	-4.66295	3.04076	-4.82785	3.04631e-10	6.65393e-09	[PF13519] von Willebrand factor type A domain; [PTHR10166] VOLTAGE-DEPENDENT CALCIUM CHANNEL SUBUNIT ALPHA-2/DELTA-RELATED
Mapoly0054s0083	1119	1382	1529	1561	1397.75	53.3195	409	404	422	635	467.5	13.1612	18.8194	-1.58007	9.72538	-1.80204	3.05447e-10	6.66421e-09
Mapoly0002s0188	13	17	17	33	20	2.08159	1	0	0	0	0.25	0.0418396	0	-6.32183	1.06871	-6.89701	3.05813e-10	6.66465e-09
Mapoly0097s0052	8	28	16	19	17.75	5.42785	0	0	0	0	0	0	0	-19.9833	-15.2261	-20.4844	3.08523e-10	6.71611e-09
Mapoly0109s0015	1123	1754	1257	1328	1365.5	31.5041	0	62	2	3	16.75	0.709762	0.0543501	-6.34912	7.36631	-6.428	3.22831e-10	7.01966e-09	[GO:0008168] methyltransferase activity; [PTHR23068:SF3] gb def: Hypothetical protein T15N1_120; [PTHR23068] DNA (CYTOSINE-5-)-METHYLTRANSFERASE 3-RELATED; [PF00145] C-5 cytosine-specific DNA methylase
Mapoly0025s0032	12	17	34	11	18.5	1.53238	0	0	0	0	0	0	0	-20.043	-15.2261	-20.5501	3.45928e-10	7.51343e-09
Mapoly0072s0089	34	166	141	112	113.25	3.54227	12	10	16	5	10.75	0.293228	0.261973	-3.3971	5.15314	-3.76984	3.47871e-10	7.54712e-09	[PF00657] GDSL-like Lipase/Acylhydrolase; [PTHR22835] ZINC FINGER FYVE DOMAIN CONTAINING PROTEIN; [GO:0016788] hydrolase activity, acting on ester bonds; [GO:0006629] lipid metabolic process
Mapoly0164s0006	271	545	469	491	444	18.3689	49	109	114	82	88.5	2.92594	3.52118	-2.32681	7.69634	-2.57494	3.54911e-10	7.69121e-09
Mapoly0097s0036	261	1028	731	897	729.25	12.4579	96	172	159	123	137.5	1.99165	2.07703	-2.40698	8.37973	-2.67905	3.58558e-10	7.76152e-09	[GO:0051087] chaperone binding; [PF02179] BAG domain
Mapoly0129s0029	211	375	266	302	288.5	5.03441	103	35	57	15.9998	52.7499	0.942892	0.519105	-2.45133	6.92255	-2.84772	3.74869e-10	8.09641e-09	[GO:0005506] iron ion binding; [KOG0156] Cytochrome P450 CYP2 subfamily; [GO:0055114] oxidation-reduction process; [GO:0016705] oxidoreductase activity, acting on paired donors, with incorporation or reduction of molecular oxygen; [GO:0020037] heme binding; [PTHR24298] FAMILY NOT NAMED; [PF00067] Cytochrome P450
Mapoly0126s0005	748	758	701	446	663.25	26.3649	377	114	236	108	208.75	7.77288	5.91882	-1.66778	8.50764	-2.00891	3.79108e-10	8.17881e-09
Mapoly0021s0060	17	50	49	43	39.75	2.43499	2	1	2	4	2.25	0.068373	0.187694	-4.14295	3.32927	-4.38333	3.90418e-10	8.404e-09	[PF15477] Small acidic protein family
Mapoly0044s0067	13	33	23	20	22.25	1.28038	0	2	0	0	0.5	0.0566694	0	-5.47569	1.87587	-5.56813	4.36278e-10	9.37026e-09	[KOG0143] Iron/ascorbate family oxidoreductases; [GO:0055114] oxidation-reduction process; [PF14226] non-haem dioxygenase in morphine synthesis N-terminal; [GO:0016706] oxidoreductase activity, acting on paired donors, with incorporation or reduction of molecular oxygen, 2-oxoglutarate as one donor, and incorporation of one atom each of oxygen into both donors; [PTHR10209] OXIDOREDUCTASE, 2OG-FE(…
Mapoly0019s0114	239.704	199.95	187.917	197.532	206.276	3.0565	31.0704	60.6119	46.7573	18.1308	39.1426	0.623623	0.410226	-2.39776	6.51393	-2.62791	4.45224e-10	9.55177e-09
Mapoly0117s0046	426	345	289	279	334.75	26.754	164	79	93	63	99.75	8.06018	5.62676	-1.7467	7.49727	-2.03049	4.50203e-10	9.64786e-09	[PTHR31718] FAMILY NOT NAMED; [PF06232] Embryo-specific protein 3, (ATS3)
Mapoly0170s0036	44	115	63	86	77	7.50237	12	1	4	9	6.5	0.461418	0.606951	-3.56634	4.51259	-3.87585	4.66079e-10	9.97698e-09
Mapoly0067s0066	136	203	166	202	176.75	6.68847	26	37	32	39	33.5	1.04348	1.23413	-2.39948	6.33106	-2.6186	4.97401e-10	1.06121e-08	[PF14825] Domain of unknown function (DUF4483)
Mapoly0034s0095	14	13	25	19	17.75	1.03953	0	0	2	0	0.5	0	0.0431751	-5.1497	1.5156	-5.64546	5.00031e-10	1.06565e-08
Mapoly0028s0029	12	19	15	30	19	1.26653	0	0	0	1	0.25	0	0.0349478	-6.24783	1.31797	-6.24442	5.37363e-10	1.14268e-08
Mapoly0164s0005	502	1394	1082	1077	1013.75	37.9859	217	219	317	329	270.5	6.85622	10.8057	-1.906	9.09753	-2.16927	5.38939e-10	1.1444e-08
Mapoly0004s0081	279	171	187	169	201.5	10.1905	63	52	41	45	50.25	2.53022	2.05636	-2.00358	6.66652	-2.21599	5.39358e-10	1.1444e-08
Mapoly0167s0002	5	25	31	32	23.25	2.03154	0	0	0	0	0	0	0	-20.3727	-15.2261	-20.9149	5.62585e-10	1.19237e-08
Mapoly0044s0099	20	39	29	17	26.25	1.38566	1	1	3	1	1.5	0.0452338	0.0875294	-4.12927	2.65741	-4.44659	5.63982e-10	1.19402e-08
Mapoly0090s0011	213	513	557	529	453	62.4341	54	12	123	44	58.25	3.39126	9.3173	-2.95918	7.352	-3.35774	5.78579e-10	1.22358e-08	[PTHR31867] FAMILY NOT NAMED; [PF03330] Rare lipoprotein A (RlpA)-like double-psi beta-barrel; [PF01357] Pollen allergen
Mapoly0160s0019	5	26	32	29	23	1.33346	0	0	0	0	0	0	0	-20.3571	-15.2261	-20.8979	6.00692e-10	1.26895e-08
Mapoly0143s0008	23	36	38	26	30.75	2.5264	0	2	3	3	2	0.0812538	0.222217	-3.9425	3.05972	-4.12228	6.16862e-10	1.30169e-08
Mapoly0086s0007	8	31	26	22	21.75	2.83959	1	0	0	0	0.25	0.045408	0	-6.44285	1.13599	-7.03156	6.36619e-10	1.34191e-08
Mapoly0116s0025	17	56	72	54	49.75	2.31043	0	5	0	1	1.5	0.111428	0.0238971	-5.05165	3.27659	-5.16393	6.61964e-10	1.39381e-08
Mapoly0014s0072	9	36	16	36	24.25	1.81064	0	0	1	0	0.25	0	0.0272149	-6.59982	1.24796	-7.11017	6.69759e-10	1.40868e-08
Mapoly0011s0152	115	268	143	140	166.5	7.89915	13	17	36	29	23.75	0.61632	1.38002	-2.80952	6.02312	-3.04912	6.7882e-10	1.42464e-08
Mapoly0080s0028	52	76	56	94	69.5	1.99641	9	8	13	11	10.25	0.205273	0.305918	-2.76139	4.78263	-3.02805	6.8063e-10	1.42688e-08
Mapoly0062s0091	102	195	173	174	161	4.64515	26	37	37	15	28.75	0.788847	0.621545	-2.48543	6.12663	-2.78389	7.16537e-10	1.49565e-08
Mapoly0054s0030	12	49	15	46	30.5	1.0576	0	1	2	0	0.75	0.0198937	0.0298776	-5.34574	2.27514	-5.70344	7.24559e-10	1.51076e-08	[GO:0016020] membrane; [PTHR11654] OLIGOPEPTIDE TRANSPORTER-RELATED; [PF00854] POT family; [KOG1237] H+/oligopeptide symporter; [GO:0006810] transport; [GO:0005215] transporter activity
Mapoly0008s0230	9	26	23	19	19.25	3.67453	0	1	0	0	0.25	0.0929148	0	-6.26669	1.27982	-6.37603	7.27543e-10	1.51535e-08	[PTHR11158] MSF1/PX19 RELATED; [KOG3336] Predicted member of the intramitochondrial sorting protein family; [PTHR11158:SF17] SUBFAMILY NOT NAMED; [PF04707] PRELI-like family
Mapoly0006s0220	285	468	556	387	424	9.59221	35	99	47	82	65.75	1.379	1.36879	-2.689	7.48129	-2.87042	7.83992e-10	1.63116e-08	[PTHR22891:SF0] SUBFAMILY NOT NAMED; [PTHR22891] EUKARYOTIC TRANSLATION INITIATION FACTOR 2C; [PF02171] Piwi domain; [GO:0005515] protein binding; [KOG1041] Translation initiation factor 2C (eIF-2C) and related proteins
Mapoly0040s0027	430	721	502	599	563	7.99157	253	167	207	81	177	2.45833	1.70799	-1.66939	8.30647	-2.00312	7.8751e-10	1.63671e-08
Mapoly0097s0086	703	1684	1169	1552	1277	36.8143	419	330	531	446	431.5	8.90456	12.3762	-1.56533	9.58323	-1.85414	8.00312e-10	1.66044e-08
Mapoly0455s0002	240	567	746	463	504	10.6727	112	109	166	76	115.75	1.94319	2.11442	-2.12241	7.95607	-2.46002	8.02946e-10	1.66342e-08	[KOG4412] 26S proteasome regulatory complex, subunit PSMD10; [PF13637] Ankyrin repeats (many copies); [PF13962] Domain of unknown function; [PF12796] Ankyrin repeats (3 copies); [PTHR24198] ANKYRIN REPEAT AND PROTEIN KINASE DOMAIN-CONTAINING PROTEIN
Mapoly0099s0050	711	586	316	493	526.5	14.0901	6	90	21	14	32.75	1.30402	0.425619	-4.00687	7.10708	-4.09207	8.05539e-10	1.667e-08	[GO:0005515] protein binding; [PF00023] Ankyrin repeat; [PF12796] Ankyrin repeats (3 copies); [PTHR24198] ANKYRIN REPEAT AND PROTEIN KINASE DOMAIN-CONTAINING PROTEIN
Mapoly0143s0024	22	71	50	63	51.5	2.24945	0	6	0	2	2	0.127335	0.0455142	-4.68649	3.50388	-4.77075	8.08808e-10	1.67197e-08
Mapoly0034s0055	17	42	40	44	35.75	1.73323	5	2	1	1	2.25	0.131534	0.0428877	-3.98994	3.17587	-4.37793	8.43959e-10	1.74277e-08	[PF06330] Trichodiene synthase (TRI5); [GO:0045482] trichodiene synthase activity; [GO:0016106] sesquiterpenoid biosynthetic process
Mapoly0048s0018	5	55	18	36	28.5	3.13515	0	0	0	0	0	0	0	-20.6664	-15.2261	-21.1828	8.59916e-10	1.77192e-08
Mapoly0093s0039	427	609	637	603	569	29.797	172	196	253	149	192.5	8.25927	9.03987	-1.56357	8.40843	-1.84838	8.70224e-10	1.79125e-08
Mapoly0026s0043	36	31	24	22	28.25	2.31244	5	1	4	2	3	0.192936	0.216321	-3.23521	3.16317	-3.56041	8.93659e-10	1.83753e-08
Mapoly0167s0011	8	22	24	30	21	2.23422	0	0	1	0	0.25	0	0.0383972	-6.39222	1.15175	-6.91775	9.35723e-10	1.92197e-08
Mapoly0004s0294	49	69	88	60	66.5	2.66667	5	10	7	10	8	0.268443	0.315604	-3.05528	4.61086	-3.25703	9.55231e-10	1.95995e-08
Mapoly2703s0001	39	57	42	64	50.5	5.6614	4	3	5	9	5.25	0.326092	0.744269	-3.26589	4.09929	-3.46657	9.78642e-10	2.00585e-08
Mapoly0022s0040	17	15	16	16	16	1.60461	2	0	0	1	0.75	0.0725254	0.0541305	-4.41501	1.7875	-4.72791	1.00835e-09	2.06235e-08
Mapoly0043s0029	37	49	42	55	45.75	1.7742	11	3	7	4	6.25	0.209646	0.183558	-2.87184	4.07044	-3.23646	1.02352e-09	2.09117e-08
Mapoly0004s0221	5	30	26	22	20.75	9.96612	0	0	0	0	0	0	0	-20.2086	-15.2261	-20.7369	1.02553e-09	2.09305e-08
Mapoly0046s0010	35	58	37	55	46.25	1.05729	5	5	0	6	4	0.0974466	0.0729718	-3.53138	3.8536	-3.69942	1.03881e-09	2.11792e-08	[GO:0031514] motile cilium; [GO:0048870] cell motility; [PTHR31543] FAMILY NOT NAMED; [PF13851] Growth-arrest specific micro-tubule binding
Mapoly0080s0094	9	16	11	25	15.25	1.053	0	0	0	0	0	0	0	-19.7643	-15.2261	-20.2659	1.06401e-09	2.16701e-08
Mapoly0051s0065	9	11	28	19	16.75	3.69738	0	0	0	0	0	0	0	-19.8996	-15.2261	-20.4245	1.0735e-09	2.18267e-08
Mapoly0119s0033	100	82	57	64	75.75	6.10845	19	11	17	14	15.25	1.0236	1.15356	-2.31244	5.08561	-2.55135	1.07396e-09	2.18267e-08
Mapoly0047s0035	41	96	104	88	82.25	4.64266	9	14	3	5	7.75	0.561135	0.208777	-3.40774	4.73607	-3.65949	1.07644e-09	2.18539e-08
Mapoly0223s0004	6	17	31	25	19.75	2.75638	0	0	0	0	0	0	0	-20.1373	-15.2261	-20.6786	1.10105e-09	2.23301e-08	[GO:0016020] membrane; [PTHR19139] AQUAPORIN TRANSPORTER; [GO:0006810] transport; [KOG0223] Aquaporin (major intrinsic protein family); [GO:0005215] transporter activity; [PF00230] Major intrinsic protein
Mapoly0054s0036	45.7262	103.125	69.3785	75.8499	73.5199	3.70181	3.3645	5.40617	6.62218	12.6985	7.02284	0.194158	0.461366	-3.38801	4.60105	-3.5624	1.10689e-09	2.24249e-08	[PF03732] Retrotransposon gag protein
Mapoly0005s0140	323	603	405	615	486.5	37.4671	191	137	147	114	147.25	10.4038	8.82636	-1.72417	8.09549	-2.02575	1.12937e-09	2.28563e-08	[PTHR32133] FAMILY NOT NAMED; [GO:0005515] protein binding; [PF00646] F-box domain
Mapoly0087s0084	10	17	12	11	12.5	1.04202	1	0	0	0	0.25	0.0298663	0	-5.64376	0.714718	-6.18902	1.13268e-09	2.28994e-08
Mapoly0026s0113	8	47	17	31	25.75	2.15539	0	0	1	0	0.25	0	0.0306127	-6.6864	1.28922	-7.1927	1.13975e-09	2.30181e-08
Mapoly0109s0027	290	234	224	277	256.25	8.79671	106	68	89	53	79	2.50253	2.14697	-1.69763	7.15413	-1.98277	1.23988e-09	2.49619e-08
Mapoly0011s0049	81	218	153	183	158.75	4.05408	28	18	26	32	26	0.504062	0.701943	-2.61017	6.06262	-2.88503	1.24421e-09	2.5023e-08
Mapoly0026s0130	211	223	233	284	237.75	81.434	88	53	74	55	67.5	19.7854	19.5012	-1.81649	7.00528	-2.11478	1.27651e-09	2.56458e-08
Mapoly0032s0161	10	21	9	14	13.5	12.3316	0	0	0	0	0	0	0	-19.5884	-15.2261	-20.059	1.31357e-09	2.6363e-08
Mapoly0022s0126	52	145	121	145	115.75	3.04649	12	19	17	15	15.75	0.352717	0.368426	-2.87759	5.48796	-3.14339	1.32047e-09	2.64739e-08	[PTHR23314] SPERM-ASSOCIATED ANTIGEN 6 (ARMADILLO REPEAT-CONTAINING); [PF00514] Armadillo/beta-catenin-like repeat; [GO:0005515] protein binding; [KOG0166] Karyopherin (importin) alpha
Mapoly1225s0001	148	327	283	276	258.5	14.2054	76	50	56	54	59	2.8137	2.68892	-2.13138	6.98994	-2.43288	1.34787e-09	2.69942e-08	[PF03083] Sugar efflux transporter for intercellular exchange; [KOG1623] Multitransmembrane protein; [PTHR10791] RAG1-ACTIVATING PROTEIN 1
Mapoly0007s0220	17	26	12	41	24	5.06771	0	0	0	2	0.5	0	0.223151	-5.58491	1.98036	-5.56919	1.34922e-09	2.69942e-08
Mapoly0047s0011	26	38	20	59	35.75	1.46925	0	4	2	0	1.5	0.0810712	0.0304393	-4.57489	2.9473	-4.7833	1.36143e-09	2.72103e-08
Mapoly0020s0003	103	171	129	157	140	6.06341	40	19	23	30	28	1.00873	1.09714	-2.32193	6.0024	-2.60558	1.37674e-09	2.74594e-08	[PTHR15907] FAMILY NOT NAMED; [PF04749] PLAC8 family
Mapoly0077s0038	182.097	244.605	226.798	196.407	212.477	2.58622	73.2528	60.233	49.287	33.0604	53.9583	0.684493	0.439501	-1.97739	6.76426	-2.26703	1.40976e-09	2.806e-08	[PF01926] 50S ribosome-binding GTPase; [PTHR32046:SF0] SUBFAMILY NOT NAMED; [PTHR32046] FAMILY NOT NAMED; [GO:0005525] GTP binding
Mapoly0041s0136	17	29	23	31	25	1.45529	1	0	4	1	1.5	0.0205846	0.116799	-4.05888	2.59549	-4.46359	1.4587e-09	2.90041e-08	[PF00504] Chlorophyll A-B binding protein; [PTHR14154:SF5] SUBFAMILY NOT NAMED; [PTHR14154] UPF0041 BRAIN PROTEIN 44-RELATED
Mapoly0118s0036	24	44	38	37	35.75	4.76505	5	3	5	3	4	0.432817	0.457754	-3.15987	3.60135	-3.48335	1.47716e-09	2.93409e-08
Mapoly0032s0048	212	438	359	416	356.25	5.98576	107	73	115	82	94.25	1.23382	1.43488	-1.91833	7.55283	-2.22893	1.52352e-09	3.01686e-08	[KOG2106] Uncharacterized conserved protein, contains HELP and WD40 domains; [GO:0005515] protein binding; [PTHR32215] FAMILY NOT NAMED; [PF00400] WD domain, G-beta repeat
Mapoly0010s0141	2788	2302	1838	1977	2226.25	155.606	177	780	147	260	341	32.4471	13.9205	-2.70677	9.84112	-2.81323	1.53177e-09	3.03008e-08	[KOG0710] Molecular chaperone (small heat-shock protein Hsp26/Hsp42); [PTHR11527] SMALL HEAT-SHOCK PROTEIN (HSP20) FAMILY; [PF00011] Hsp20/alpha crystallin family
Mapoly0112s0011	21	59	49	47	44	1.55398	5	4	3	4	4	0.130592	0.112534	-3.45943	3.78842	-3.74166	1.53895e-09	3.03879e-08
Mapoly0146s0031	96	140	139	143	129.5	4.19648	27	3	14	0	11	0.358072	0.168087	-3.55737	5.16877	-4.05733	1.53933e-09	3.03879e-08
Mapoly0164s0008	104	125	142	135	126.5	7.61493	34	28	32	23	29.25	1.56261	1.45139	-2.11263	5.95788	-2.40127	1.54462e-09	3.04612e-08
Mapoly0050s0034	9	11	16	16	13	1.79548	0	0	0	0	0	0	0	-19.534	-15.2261	-20.0348	1.57668e-09	3.10416e-08	[PTHR31867] FAMILY NOT NAMED; [PF03330] Rare lipoprotein A (RlpA)-like double-psi beta-barrel; [PF01357] Pollen allergen
Mapoly0011s0014	26	60	17	27	32.5	1.1972	0	3	2	1	1.5	0.0557842	0.0478659	-4.43739	2.87242	-4.59472	1.57727e-09	3.10416e-08
Mapoly0026s0054	101	120	86	66	93.25	3.06823	28	14	24	15	20.25	0.570549	0.570432	-2.20318	5.43557	-2.49081	1.59964e-09	3.14498e-08	[GO:0016758] transferase activity, transferring hexosyl groups; [K13496] UDP-glucosyl transferase 73C [EC:2.4.1.-]; [PF00201] UDP-glucoronosyl and UDP-glucosyl transferase; [PTHR11926] GLUCOSYL/GLUCURONOSYL TRANSFERASES; [GO:0008152] metabolic process; [2.4.1.-] Hexosyltransferases.; [KOG1192] UDP-glucuronosyl and UDP-glucosyl transferase
Mapoly0094s0009	71	65	49	80	66.25	3.03318	8	11	18	8	11.25	0.386776	0.510298	-2.55799	4.78754	-2.81928	1.61105e-09	3.16419e-08	[GO:0005524] ATP binding; [KOG0198] MEKK and related serine/threonine protein kinases; [PF00069] Protein kinase domain; [GO:0004672] protein kinase activity; [GO:0006468] protein phosphorylation; [PTHR24361] MITOGEN-ACTIVATED KINASE KINASE KINASE
Mapoly0006s0243	17	25	14	25	20.25	1.61738	0	0	3	1	1	0	0.132517	-4.33983	2.16954	-4.66717	1.62341e-09	3.18523e-08
Mapoly0129s0023	272	226	125	237	215	22.41	36	58	44	46	46	4.48119	4.40137	-2.22463	6.67271	-2.39839	1.66361e-09	3.26003e-08	[PTHR11635] CAMP-DEPENDENT PROTEIN KINASE REGULATORY CHAIN; [PF00027] Cyclic nucleotide-binding domain
Mapoly0024s0043	82	136	99	167	121	5.45494	21	18	35	17	22.75	0.733654	0.987027	-2.41107	5.73969	-2.72646	1.87734e-09	3.66563e-08
Mapoly0095s0058	6	18	18.9999	18	15.25	1.95369	0	0	0	0	0	0	0	-19.7642	-15.2261	-20.2852	1.87776e-09	3.66563e-08
Mapoly0022s0138	92	30	23	37	45.5	1.42128	3	6	2	3	3.5	0.137036	0.0792934	-3.70043	3.67151	-3.77981	1.90364e-09	3.71238e-08
Mapoly0008s0151	377	599	495	467	484.5	12.3203	5	77	9	14	26.25	1.01749	0.274861	-4.20611	6.93157	-4.32119	1.93226e-09	3.7644e-08
Mapoly0022s0169	211	283	192	257	235.75	1.18962	40	75	41	41	49.25	0.261976	0.188784	-2.25906	6.80811	-2.46489	2.05775e-09	3.99676e-08	[PF12774] Hydrolytic ATP binding site of dynein motor region D1; [PF12780] P-loop containing dynein motor region D4; [K10408] dynein heavy chain, axonemal; [PF12775] P-loop containing dynein motor region D3; [GO:0005858] axonemal dynein complex; [GO:0030286] dynein complex; [PTHR10676] DYNEIN HEAVY CHAIN FAMILY PROTEIN; [PF03028] Dynein heavy chain and region D6 of dynein motor; [GO:0016887] ATPa…
Mapoly0069s0015	12	19	16	21	17	1.03196	0	0	1	1	0.5	0	0.0545281	-5.08741	1.6179	-5.30356	2.07537e-09	4.02693e-08
Mapoly0166s0020	32	55	56	50	48.25	4.33699	8	7	2	5	5.5	0.562837	0.303054	-3.13302	4.08441	-3.39086	2.13193e-09	4.12836e-08
Mapoly0021s0004	10	9	14	17	12.5	1.08814	0	0	0	0	0	0	0	-19.4774	-15.2261	-19.9703	2.29915e-09	4.44325e-08	[PF00188] Cysteine-rich secretory protein family; [PTHR10334] CYSTEINE-RICH SECRETORY PROTEIN-RELATED
Mapoly0003s0053	7	16	14	15	13	4.38851	0	0	0	0	0	0	0	-19.534	-15.2261	-20.0378	2.33726e-09	4.50787e-08
Mapoly0079s0026	96	354	305	401	289	11.0581	11	51	18	23	25.75	1.08394	0.702602	-3.48842	6.54425	-3.69606	2.3444e-09	4.51712e-08
Mapoly0001s0253	139	263	407	144	238.25	3.356	23	9	17	46	23.75	0.175291	0.426459	-3.32648	6.32322	-3.54668	2.35875e-09	4.54024e-08	[PF00168] C2 domain; [PF12357] Phospholipase D C terminal; [GO:0005515] protein binding; [PTHR18896] PHOSPHOLIPASE D; [PF00614] Phospholipase D Active site motif; [GO:0008152] metabolic process; [GO:0003824] catalytic activity; [KOG1329] Phospholipase D1
Mapoly0210s0006	9	10	14	21	13.5	1.37191	0	0	0	0	0	0	0	-19.5884	-15.2261	-20.0937	2.38996e-09	4.59572e-08
Mapoly0146s0041	93	173	137	160	140.75	6.06385	14	18	17	33	20.5	0.59508	1.02129	-2.77944	5.8345	-2.97231	2.41082e-09	4.63123e-08	[GO:0005515] protein binding; [PF00612] IQ calmodulin-binding motif; [PTHR22706] UNCHARACTERIZED
Mapoly0009s0238	1419	15696	8631	17976	10930.5	1020.47	43	723	89	363	304.5	33.5579	20.3819	-5.16577	10.99	-5.31093	2.46627e-09	4.73281e-08	[PTHR31232] FAMILY NOT NAMED; [PF05938] Plant self-incompatibility protein S1
Mapoly0062s0072	806	1061	1126	1057	1012.5	82.0835	181	298	254	415	287	17.1736	25.508	-1.8188	9.1557	-2.00862	2.46861e-09	4.73281e-08
Mapoly0017s0002	10	37	19	26	23	1.23504	0	2	0	0	0.5	0.0524925	0	-5.52351	1.90476	-5.62591	2.543e-09	4.86575e-08
Mapoly0036s0056	83	261	194	222	190	22.9158	31	8	20	36	23.75	1.77466	3.14382	-3	6.12996	-3.28433	2.71161e-09	5.17811e-08
Mapoly0033s0097	23	59	32	37	37.75	1.47947	2	4	1	4	2.75	0.105332	0.0976488	-3.77896	3.45023	-3.93231	2.82467e-09	5.37802e-08
Mapoly0041s0107	71	68	70	73	70.5	2.85975	24	12	9	7	13	0.595012	0.290267	-2.43911	4.91791	-2.75593	2.82931e-09	5.38155e-08	[GO:0005515] protein binding; [PF00646] F-box domain
Mapoly0022s0177	1038	1942	1792	1975	1686.75	90.5219	211	465	234	544	363.5	16.2066	19.9517	-2.21422	9.71637	-2.38973	2.84533e-09	5.40137e-08	[KOG1603] Copper chaperone; [GO:0030001] metal ion transport; [PF00403] Heavy-metal-associated domain; [GO:0046872] metal ion binding
Mapoly0055s0042	11	42	34	46	33.25	1.48552	0	3	1	1	1.25	0.0645139	0.039208	-4.73334	2.81809	-4.90665	2.93339e-09	5.5576e-08
Mapoly0097s0029	15	21	30	32	24.5	1.47208	0	2	2	1	1.25	0.0584397	0.0752167	-4.29276	2.55345	-4.52533	2.93688e-09	5.55874e-08
Mapoly0092s0059	35	32	50	25	35.5	2.86946	5	4	4	4	4.25	0.30668	0.294608	-3.06228	3.65292	-3.32032	2.96204e-09	5.60087e-08
Mapoly0057s0037	22	31	15	21	22.25	1.08104	1	3	2	0	1.5	0.0858481	0.0408324	-3.89076	2.54967	-4.13769	3.00099e-09	5.66896e-08
Mapoly0025s0061	85	184	181	169	154.75	8.59932	47	16	34	23	30	1.61801	1.27223	-2.3669	6.10634	-2.72986	3.09328e-09	5.83188e-08
Mapoly0011s0021	10	14	30	17	17.75	2.01309	0	0	1	0	0.25	0	0.0411777	-6.14965	1.02704	-6.66833	3.25567e-09	6.12605e-08
Mapoly0061s0087	29	52	33	34	37	1.12642	1	3	8	3	3.75	0.0564583	0.140059	-3.30256	3.58414	-3.58099	3.30211e-09	6.20134e-08
Mapoly0043s0137	13	24	20	19	19	2.07941	0	0	1	2	0.75	0	0.15637	-4.66293	2.03024	-4.79697	3.33786e-09	6.26239e-08
Mapoly0143s0021	18	42	40	33	33.25	3.6221	1	1	5	3	2.5	0.0914105	0.370863	-3.73335	3.23529	-4.03256	3.35131e-09	6.27919e-08	[PF03645] Tctex-1 family; [K10420] dynein light chain Tctex-type 1; [PTHR21255] T-COMPLEX-ASSOCIATED-TESTIS-EXPRESSED 1/ DYNEIN LIGHT CHAIN; [KOG4081] Dynein light chain
Mapoly0246s0005	45	66	69	74	63.5	1.72769	11	10	11	11	10.75	0.239526	0.268343	-2.56242	4.7587	-2.83055	3.35333e-09	6.27919e-08
Mapoly0001s0559	234	218	228	228	227	35.4912	54.0001	72.0001	81	46	63.2501	8.70362	8.65335	-1.84355	6.93281	-2.09562	3.47023e-09	6.47921e-08	[K13448] calcium-binding protein CML; [PTHR10891] EF-HAND CALCIUM-BINDING DOMAIN CONTAINING PROTEIN; [PF13499] EF-hand domain pair; [PF13833] EF-hand domain pair; [GO:0005509] calcium ion binding; [KOG0027] Calmodulin and related proteins (EF-Hand superfamily)
Mapoly0006s0293	73	88	93	103	89.25	4.93933	15	24	15	9	15.75	0.95277	0.573019	-2.5025	5.27548	-2.75953	3.55216e-09	6.61937e-08
Mapoly0053s0004	6	15	17	17	13.75	6.65098	0	0	0	0	0	0	0	-19.6149	-15.2261	-20.1341	3.68717e-09	6.86433e-08	[GO:0006355] regulation of transcription, DNA-dependent; [PF02671] Paired amphipathic helix repeat; [GO:0005634] nucleus
Mapoly0006s0219	113	345	370	267	273.75	68.7234	12	43	27	42	31	6.26927	7.93213	-3.14252	6.63623	-3.34149	3.77709e-09	7.02495e-08
Mapoly0009s0148	14	20	19	18	17.75	1.23547	2	2	0	0	1	0.122183	0	-4.14972	2.09966	-4.44893	3.80051e-09	7.0617e-08
Mapoly0015s0107	113	148	173	166	150	8.97712	42	26	51	26	36.25	1.65626	1.95131	-2.04891	6.22244	-2.37833	3.86105e-09	7.16728e-08
Mapoly0080s0047	9	41	49	48	36.75	3.47384	0	1	0	3	1	0.0605226	0.1947	-5.19965	2.80058	-5.26022	3.90941e-09	7.24611e-08
Mapoly0008s0104	117	130	106	109	115.5	2.34328	9	24	21	25	19.75	0.311396	0.435197	-2.54797	5.64462	-2.71472	3.91103e-09	7.24611e-08
Mapoly0083s0015	238.633	355.793	301.003	321.518	304.237	2.02012	39.7045	78.3454	65.2035	80.8435	66.0242	0.351951	0.44675	-2.20413	7.22026	-2.40354	4.05125e-09	7.49151e-08	[PTHR10676:SF136] DYNEIN HEAVY CHAIN 6, AXONEMAL-RELATED; [PF12774] Hydrolytic ATP binding site of dynein motor region D1; [PF12780] P-loop containing dynein motor region D4; [GO:0005524] ATP binding; [PF12775] P-loop containing dynein motor region D3; [GO:0005858] axonemal dynein complex; [GO:0001539] ciliary or flagellar motility; [GO:0030286] dynein complex; [PTHR10676] DYNEIN HEAVY CHAIN FAMI…
Mapoly0146s0016	29	103	58	83	68.25	5.29113	3	9	10	3	6.25	0.421445	0.405242	-3.4489	4.42022	-3.74165	4.10601e-09	7.57824e-08
Mapoly0075s0041	320	409	353	420	375.5	5.78522	172	113	145	81	127.75	1.81333	1.50046	-1.55549	7.78718	-1.86722	4.2252e-09	7.79078e-08	[PF07919] Gryzun, putative trafficking through Golgi; [PTHR14374] FOIE GRAS; [PF11817] Foie gras liver health family 1; [KOG4386] Uncharacterized conserved protein
Mapoly0012s0044	1143	1186	850	1303	1120.5	30.5492	115	353	215	369	263	5.97904	7.64699	-2.09101	9.16578	-2.2292	4.47231e-09	8.23067e-08	[PF13371] Tetratricopeptide repeat; [GO:0005515] protein binding; [PF13414] TPR repeat; [KOG0548] Molecular co-chaperone STI1; [PF13181] Tetratricopeptide repeat; [PTHR23083] TETRATRICOPEPTIDE REPEAT PROTEIN, TPR
Mapoly0099s0048	12	22	45	18	24.25	3.40814	2	1	0	1	1	0.165175	0.0726876	-4.59989	2.36098	-4.90963	4.8208e-09	8.85512e-08
Mapoly0011s0210	42	111	69	69	72.75	4.64208	5	5	1	12	5.75	0.270122	0.428164	-3.66131	4.46808	-3.79968	4.9069e-09	9.0047e-08
Mapoly0058s0096	193	645	337	533	427	7.46664	41	84	75	90	72.5	0.96878	1.305	-2.55818	7.54332	-2.77976	4.91212e-09	9.0057e-08
Mapoly0015s0099	74	156	105	151	121.5	1.98033	11	22	11	22	16.5	0.233167	0.250529	-2.88042	5.57773	-3.06721	4.92764e-09	9.02558e-08	[KOG0978] E3 ubiquitin ligase involved in syntaxin degradation; [PTHR13140] MYOSIN; [GO:0005515] protein binding; [PF00400] WD domain, G-beta repeat
Mapoly0092s0017	411	488	491	535	481.25	40.9057	212	180	191	84	166.75	14.0284	9.85776	-1.5291	8.16151	-1.8398	4.99491e-09	9.13684e-08
Mapoly0022s0143	305	354	380	363	350.5	15.4031	141	125	108	74	112	4.94391	3.50551	-1.64592	7.65756	-1.93077	4.99786e-09	9.13684e-08	[PTHR31867] FAMILY NOT NAMED; [PF03330] Rare lipoprotein A (RlpA)-like double-psi beta-barrel; [PF01357] Pollen allergen
Mapoly0049s0029	196	279	287	198	240	9.18395	0	35	20	21	19	0.739217	0.721533	-3.65896	6.17731	-3.80176	5.03379e-09	9.19381e-08
Mapoly0022s0137	46	31	13	22	28	1.12553	1	1	0	4	1.5	0.0364896	0.0910827	-4.22238	2.7847	-4.20624	5.21248e-09	9.51117e-08
Mapoly0151s0028	342	400	516	269	381.75	8.47112	114	137	91	60	100.5	2.42017	1.46689	-1.92543	7.64919	-2.19006	5.25753e-09	9.58432e-08	[PTHR12526:SF160] PUTATIVE TRANSFERASE; [GO:0009058] biosynthetic process; [PF00534] Glycosyl transferases group 1; [PF13439] Glycosyltransferase Family 4; [PTHR12526] GLYCOSYLTRANSFERASE
Mapoly0165s0003	79	137	96	99	102.75	4.00045	19	16	31	20	21.5	0.574106	0.866036	-2.25673	5.58359	-2.53721	5.29755e-09	9.64815e-08
Mapoly0508s0001	5	13	28	38	21	1.00303	0	0	0	0	0	0	0	-20.2258	-15.2261	-20.779	5.3794e-09	9.78797e-08	[GO:0009607] response to biotic stimulus; [PTHR31213] FAMILY NOT NAMED; [PF00407] Pathogenesis-related protein Bet v I family; [GO:0006952] defense response
Mapoly0036s0005	189	350	278	322	284.75	9.17163	94	11	66	34	51.25	1.24543	1.3643	-2.47407	6.89922	-2.87544	5.46401e-09	9.93254e-08	[GO:0015035] protein disulfide oxidoreductase activity; [PTHR10168] GLUTAREDOXIN; [GO:0045454] cell redox homeostasis; [PF00462] Glutaredoxin; [GO:0009055] electron carrier activity; [PTHR10168:SF44] GLUTAREDOXIN DOMAIN-CONTAINING CYSTEINE-RICH PROTEIN 1
Mapoly0024s0019	32	78	67	57	58.5	1.71423	10	7	6	9	8	0.203384	0.202994	-2.87036	4.49249	-3.14221	5.48223e-09	9.95629e-08	[PF09995] Uncharacterized protein conserved in bacteria (DUF2236)
Mapoly0015s0181	16	55	28	45	36	1.92097	2	3	3	3	2.75	0.115595	0.142508	-3.71049	3.38525	-3.95989	5.51619e-09	1.00085e-07
Mapoly0048s0078	13	21	27	11	18	3.55756	0	1	1	0	0.5	0.0974962	0.0732126	-5.16988	1.62946	-5.44674	5.55756e-09	1.00741e-07	[PTHR23422] DIPEPTIDYL PEPTIDASE III-RELATED
Mapoly0057s0034	9	18	12	23	15.5	1.05342	1	0	0	0	0.25	0.023871	0	-5.9541	0.883435	-6.52645	5.73869e-09	1.03829e-07
Mapoly0056s0062	540	679	1291	575	771.25	21.8332	194	243	272	222	232.75	5.29511	6.12525	-1.72842	8.78544	-2.00105	5.8314e-09	1.05309e-07
Mapoly0001s0212	368	791	615	761	633.75	15.8065	290	149	259	178	219	4.35591	4.7042	-1.53298	8.56677	-1.86438	5.99709e-09	1.08099e-07	[PTHR23084] PHOSPHATIDYLINOSITOL-4-PHOSPHATE 5-KINASE RELATED; [PF02493] MORN repeat
Mapoly0013s0189	68	180	157	169	143.5	3.66915	15	24	31	4	18.5	0.43215	0.342585	-2.95545	5.71402	-3.30698	6.03565e-09	1.08692e-07	[GO:0005515] protein binding; [PF00612] IQ calmodulin-binding motif; [PTHR32295] FAMILY NOT NAMED
Mapoly0032s0054	27	110	82	115	83.5	5.76032	13	11	8	3	8.75	0.675856	0.306527	-3.25442	4.79065	-3.61614	6.11843e-09	1.1008e-07
Mapoly0097s0092	250	331	352	281	303.5	23.5519	73	83	126	73	88.75	5.21667	6.65933	-1.77388	7.39221	-2.05171	6.64236e-09	1.19109e-07
Mapoly3786s0001	19	46	28	38	32.75	1.45743	3	0	6	0	2.25	0.0471413	0.0985581	-3.86349	3.02908	-4.38021	6.64493e-09	1.19109e-07
Mapoly0084s0074	14	30	43	33	30	1.99799	5	0	0	1	1.5	0.115474	0.0344743	-4.32191	2.71925	-4.80154	6.67649e-09	1.19563e-07
Mapoly0153s0016	26.0515	65.1103	75.8436	72.53	59.8839	2.07763	9.97164	6.19292	4.98135	0	5.28648	0.223694	0.0626498	-3.50178	4.15482	-3.92372	6.76242e-09	1.20878e-07
Mapoly0245s0004	6	19	11	19	13.75	1.49717	0	0	0	0	0	0	0	-19.6149	-15.2261	-20.1226	6.8019e-09	1.21358e-07	[GO:0055114] oxidation-reduction process; [PF00141] Peroxidase; [GO:0020037] heme binding; [PTHR31235] FAMILY NOT NAMED; [GO:0006979] response to oxidative stress; [GO:0004601] peroxidase activity
Mapoly4159s0001	19	44	41	38	35.5	1.79207	3	0	3	5	2.75	0.0530786	0.187539	-3.69031	3.36672	-3.96064	7.07384e-09	1.25977e-07	[GO:0005524] ATP binding; [KOG1187] Serine/threonine protein kinase; [PF00069] Protein kinase domain; [GO:0004672] protein kinase activity; [GO:0006468] protein phosphorylation; [PF00139] Legume lectin domain; [GO:0030246] carbohydrate binding; [PTHR24420] LEUCINE-RICH REPEAT RECEPTOR-LIKE PROTEIN KINASE
Mapoly0135s0028	16	14	18	18	16.5	3.07313	0	2	1	0	0.75	0.18583	0.0697723	-4.4594	1.88223	-4.65316	7.19556e-09	1.28026e-07
Mapoly0011s0059	5	18	15	19	14.25	2.61725	0	0	0	0	0	0	0	-19.6664	-15.2261	-20.1879	7.35786e-09	1.30794e-07
Mapoly0022s0181	80	102	71	89	85.5	6.97734	25	14	28	10	19.25	1.30885	1.30026	-2.15106	5.33275	-2.48135	7.41388e-09	1.31547e-07
Mapoly0009s0242	40	110	90	93	83.25	3.47866	11	17	8	3	9.75	0.506726	0.187705	-3.09397	4.884	-3.39048	8.67852e-09	1.52443e-07	[PF00657] GDSL-like Lipase/Acylhydrolase; [PTHR22835] ZINC FINGER FYVE DOMAIN CONTAINING PROTEIN; [GO:0016788] hydrolase activity, acting on ester bonds; [GO:0006629] lipid metabolic process
Mapoly0041s0009	189	270	199	284	235.5	6.18809	79	70	69	52	67.5	1.65363	1.40346	-1.80277	7.00994	-2.08092	8.8204e-09	1.54794e-07
Mapoly0110s0041	45	78	230	38	97.75	3.05313	3	7	8	8	6.5	0.137135	0.218485	-3.91058	4.75163	-4.17041	9.31453e-09	1.63021e-07
Mapoly0056s0092	19	41	36	24	30	2.19119	0	0	3	4	1.75	0	0.235416	-4.09952	2.94968	-4.28215	9.40158e-09	1.64396e-07
Mapoly0001s0225	8	18	13	24	15.75	1.76547	0	1	0	0	0.25	0.0544999	0	-5.97718	1.13489	-6.08616	9.70182e-09	1.69492e-07
Mapoly0006s0221	18	47	26	24	28.75	3.42866	4	2	4	1	2.75	0.288099	0.24096	-3.38605	3.14029	-3.75935	9.89856e-09	1.7246e-07	[PF14713] Domain of unknown function (DUF4464)
Mapoly0093s0069	29	49	61	50	47.25	3.02905	4	6	4	8	5.5	0.27775	0.362538	-3.10281	4.10454	-3.3081	9.94608e-09	1.73132e-07	[PTHR31301] FAMILY NOT NAMED; [PF03195] Protein of unknown function DUF260
Mapoly0049s0118	261.826	295.468	231.075	323.528	277.974	5.64247	107.235	90.583	101.873	52.7972	88.122	1.79552	1.45764	-1.65738	7.30378	-1.94789	1.00972e-08	1.75604e-07	[PTHR32002] FAMILY NOT NAMED; [PF02042] RWP-RK domain
Mapoly0036s0022	290	1185	724	1146	836.25	17.9514	113	217	229	168	181.75	3.09575	3.65574	-2.20198	8.67944	-2.47461	1.02056e-08	1.77328e-07	[PTHR11668] SERINE/THREONINE PROTEIN PHOSPHATASE; [PF00149] Calcineurin-like phosphoesterase; [GO:0016787] hydrolase activity
Mapoly0053s0093	112	151	115	125	125.75	4.41386	14	34	25	24	24.25	0.773559	0.781489	-2.3745	5.85005	-2.56988	1.07003e-08	1.85591e-07
Mapoly0010s0194	29	38	40	29	34	2.15358	8	4	4	0	4	0.307251	0.0946865	-3.08746	3.51324	-3.48605	1.07434e-08	1.86171e-07	[PTHR13555:SF2] UNCHARACTERIZED; [PTHR13555] C2H2 ZINC FINGER CGI-62-RELATED; [PF13913] zinc-finger of a C2HC-type
Mapoly0002s0146	42	58	28	58	46.5	6.62583	11	4	9	5	7.25	0.850519	0.866098	-2.68117	4.18976	-3.01014	1.10438e-08	1.90691e-07
Mapoly2201s0001	265	588	422	544	454.75	19.7411	98	154	146	86	121	4.77655	4.29667	-1.91007	7.92549	-2.18558	1.12419e-08	1.93765e-07
Mapoly0029s0037	351	578	458	472	464.75	6.10583	59	52	130	155	99	0.614784	1.71851	-2.23095	7.80827	-2.45143	1.13069e-08	1.94711e-07
Mapoly0046s0122	83	195	140	164	145.5	2.79211	21	34	24	27	26.5	0.47701	0.468166	-2.45695	6.02826	-2.69206	1.13695e-08	1.95614e-07	[GO:0000287] magnesium ion binding; [PF13243] Prenyltransferase-like; [PF01397] Terpene synthase, N-terminal domain; [GO:0016829] lyase activity; [PF03936] Terpene synthase family, metal binding domain; [GO:0008152] metabolic process; [PTHR31739] FAMILY NOT NAMED; [GO:0010333] terpene synthase activity
Mapoly0019s0158	55	57	44	57	53.25	10.0266	1	2	7	11	5.25	0.257963	1.61817	-3.34239	4.14348	-3.48092	1.17311e-08	2.01477e-07
Mapoly0058s0076	24	53	81	54	53	4.71306	11	4	3	5	5.75	0.510333	0.32649	-3.20435	4.16315	-3.55982	1.21318e-08	2.07988e-07
Mapoly0106s0041	249	675	496	533	488.25	12.3755	47	116	90	121	93.5	1.83396	2.42317	-2.38458	7.83082	-2.59054	1.21709e-08	2.08472e-07	[PF00933] Glycosyl hydrolase family 3 N terminal domain; [GO:0004553] hydrolase activity, hydrolyzing O-glycosyl compounds; [GO:0005975] carbohydrate metabolic process; [PTHR30620] PERIPLASMIC BETA-GLUCOSIDASE-RELATED; [PF01915] Glycosyl hydrolase family 3 C-terminal domain
Mapoly0099s0060	33	82	64	69	62	1.12321	13	6	11	9	9.75	0.135833	0.158613	-2.66879	4.65082	-2.99531	1.33278e-08	2.27683e-07
Mapoly0103s0066	9	24	27	9	17.25	2.785	1	0	0	0	0.25	0.0566832	0	-6.10843	0.962813	-6.68521	1.3694e-08	2.33525e-07
Mapoly0021s0106	12	5	22	14	13.25	1.09809	0	0	0	0	0	0	0	-19.5614	-15.2261	-20.0577	1.37371e-08	2.34053e-07
Mapoly0158s0009	57	86	92	82	79.25	2.36968	9	6	11	20	11.5	0.184233	0.43906	-2.78478	4.9935	-2.99635	1.38927e-08	2.36286e-07	[GO:0005524] ATP binding; [KOG0661] MAPK related serine/threonine protein kinase; [PF00069] Protein kinase domain; [GO:0004672] protein kinase activity; [PTHR24055] MITOGEN-ACTIVATED PROTEIN KINASE; [GO:0006468] protein phosphorylation; [PTHR24055:SF72] MAPK/MAK/MRK OVERLAPPING KINASE-RELATED; [K08830] renal tumor antigen [EC:2.7.11.22]; [2.7.11.22] Cyclin-dependent kinase.
Mapoly0066s0108	8	23	11	8	12.5	1.06734	0	0	0	0	0	0	0	-19.4774	-15.2261	-19.9511	1.39262e-08	2.36647e-07
Mapoly0060s0076	118	219	147	186	167.5	5.31441	1	30	11	13	13.75	0.482259	0.34853	-3.60666	5.69245	-3.74353	1.40908e-08	2.38812e-07
Mapoly0069s0080	22	29	19	29	24.75	1.70717	2	1	3	4	2.5	0.0840321	0.225608	-3.30742	3.02718	-3.52562	1.47959e-08	2.50543e-07
Mapoly0086s0074	85	89	78	59	77.75	2.17038	25	16	22	14	19.25	1.041	0.856256	-2.01398	5.2768	-2.29169	1.58162e-08	2.67586e-07
Mapoly0006s0127	26	86	39	43	48.5	3.16389	8	7	5	3	5.75	0.410919	0.224742	-3.07635	4.08844	-3.38052	1.58979e-08	2.68731e-07
Mapoly0057s0043	235.994	112.047	124.526	125.061	149.407	2.42905	16.757	12.8735	50.1079	30.5165	27.5637	0.210946	0.595726	-2.4384	5.99885	-2.65147	1.62795e-08	2.74941e-07	[PTHR10641] MYB-LIKE DNA-BINDING PROTEIN MYB
Mapoly0088s0073	8	13	19	15	13.75	1.53692	1	0	0	0	0.25	0.0390306	0	-5.78126	0.802231	-6.36404	1.65102e-08	2.7835e-07
Mapoly0013s0115	120	304	244	313	245.25	6.72081	21	55	18	4	24.5	0.901316	0.231784	-3.3234	6.34586	-3.58614	1.67969e-08	2.82338e-07
Mapoly0016s0078	320	495	378	425	404.5	6.45279	111	167	118	80	119	1.95581	1.38237	-1.76518	7.82247	-2.01557	1.68648e-08	2.83091e-07	[PTHR19375] HEAT SHOCK PROTEIN 70KDA; [KOG0103] Molecular chaperones HSP105/HSP110/SSE1, HSP70 superfamily; [PTHR19375:SF78] SUBFAMILY NOT NAMED; [PF00012] Hsp70 protein
Mapoly0145s0016	194	80	29	93	99	5.84705	12	15	18	6	12.75	0.749898	0.633393	-2.95693	5.11329	-3.14028	1.69816e-08	2.84803e-07	[K03231] elongation factor EF-1 alpha subunit [EC:3.6.5.3]; [3.6.5.3] Protein-synthesizing GTPase.; [PF03143] Elongation factor Tu C-terminal domain; [PF00009] Elongation factor Tu GTP binding domain; [GO:0003924] GTPase activity; [PTHR23115] TRANSLATION FACTOR; [GO:0005525] GTP binding; [PF03144] Elongation factor Tu domain 2; [KOG0052] Translation elongation factor EF-1 alpha/Tu
Mapoly0020s0057	26	31	13	18	22	1.11473	2	3	2	1	2	0.11551	0.0670186	-3.45942	2.74346	-3.67467	1.73957e-08	2.91242e-07
Mapoly0005s0198	6	12	12	13	10.75	2.03876	0	0	0	0	0	0	0	-19.2598	-15.2261	-19.7653	1.77936e-08	2.97646e-07
Mapoly0006s0275	111	153	116.91	167	136.977	1.80121	26	32	39	33	32.5	0.330824	0.422185	-2.07543	6.108	-2.32154	1.89015e-08	3.14813e-07
Mapoly0213s0009	51.3249	179.047	154.615	132.12	129.277	3.06592	26.7858	15	13.0492	24.4961	19.8328	0.393632	0.414608	-2.7045	5.7268	-2.98924	1.94596e-08	3.23549e-07	[GO:0055114] oxidation-reduction process; [GO:0005507] copper ion binding; [GO:0016491] oxidoreductase activity; [PTHR11709] MULTI-COPPER OXIDASE; [PTHR11709:SF2] SPORE COAT PROTEIN; [PF07731] Multicopper oxidase
Mapoly0076s0100	14	16	40	16	21.5	12.8886	0	1	0	2	0.75	0.291255	0.62463	-4.84127	2.18915	-4.88451	1.98749e-08	3.29886e-07
Mapoly0062s0034	11	13	5	14	10.75	4.34513	0	0	0	0	0	0	0	-19.2598	-15.2261	-19.7103	1.99244e-08	3.30423e-07
Mapoly0238s0001	6	13	10	23	13	1.06998	0	0	0	0	0	0	0	-19.534	-15.2261	-20.0503	2.08826e-08	3.45422e-07
Mapoly0111s0047	6	11	17	12	11.5	1.23785	0	0	0	0	0	0	0	-19.3571	-15.2261	-19.8734	2.09571e-08	3.46357e-07
Mapoly0090s0057	75	59	147	50	82.75	1.26062	8	11	12	15	11.5	0.126145	0.189033	-2.84712	5.01712	-3.0666	2.35163e-08	3.86336e-07	[GO:0050660] flavin adenine dinucleotide binding; [GO:0055114] oxidation-reduction process; [PTHR10668] PHYTOENE DEHYDROGENASE; [KOG2624] Triglyceride lipase-cholesterol esterase; [GO:0016614] oxidoreductase activity, acting on CH-OH group of donors; [PF00732] GMC oxidoreductase; [PF05199] GMC oxidoreductase
Mapoly0117s0026	12	46	32	41	32.75	2.99838	2	4	3	1	2.5	0.240955	0.147368	-3.71149	3.23479	-4.01349	2.46088e-08	4.0394e-07
Mapoly0023s0176	8	12	9	9	9.5	1.34652	0	0	0	0	0	0	0	-19.0814	-15.2261	-19.5525	2.48379e-08	4.07008e-07	[GO:0006355] regulation of transcription, DNA-dependent; [PF02671] Paired amphipathic helix repeat; [GO:0005634] nucleus; [KOG4204] Histone deacetylase complex, SIN3 component
Mapoly0075s0042	6	25	15	17	15.75	1.60662	0	0	1	0	0.25	0	0.0372727	-5.97718	0.93561	-6.48547	2.5397e-08	4.15464e-07	[GO:0005506] iron ion binding; [GO:0055114] oxidation-reduction process; [GO:0016705] oxidoreductase activity, acting on paired donors, with incorporation or reduction of molecular oxygen; [PTHR24296] FAMILY NOT NAMED; [GO:0020037] heme binding; [PF00067] Cytochrome P450
Mapoly0020s0019	287	410	233	356	321.5	5.07085	100	94	132	92	104.5	1.31132	1.56387	-1.62132	7.5447	-1.88148	2.54783e-08	4.16441e-07	[PTHR11328] FAMILY NOT NAMED; [KOG4830] Predicted sugar transporter; [PF13347] MFS/sugar transport protein
Mapoly0129s0028	134	204	103	171	153	3.48952	3	35	15	10.0002	15.75	0.424928	0.251459	-3.2801	5.69761	-3.4323	2.56359e-08	4.18661e-07	[PF13855] Leucine rich repeat; [PF13516] Leucine Rich repeat; [PF08263] Leucine rich repeat N-terminal domain; [GO:0005515] protein binding; [PF00560] Leucine Rich Repeat; [PTHR24420] LEUCINE-RICH REPEAT RECEPTOR-LIKE PROTEIN KINASE
Mapoly0004s0196	10	31	25	20	21.5	1.66731	0	3	0	0	0.75	0.113462	0	-4.84127	2.1507	-4.94785	2.60434e-08	4.24957e-07
Mapoly0144s0011	92	80	69	116	89.25	4.59244	12	26	18	13	17.25	0.894146	0.709131	-2.37125	5.34332	-2.58177	2.66144e-08	4.33908e-07
Mapoly0039s0117	42	80	165	57	86	5.94206	4	7	5	14	7.5	0.329017	0.625381	-3.51937	4.78923	-3.7066	2.70532e-08	4.40317e-07
Mapoly0008s0224	2	22	25	38	21.75	5.13767	0	0	0	0	0	0	0	-20.2765	-15.2261	-20.8314	2.97212e-08	4.82114e-07	[PTHR21136] SNARE PROTEINS; [PF13774] Regulated-SNARE-like domain
Mapoly0036s0006	294	233	148	160	208.75	7.69441	94	45	77	38	63.5	2.15197	1.88507	-1.71695	6.81643	-1.99303	2.99039e-08	4.84669e-07	[PF00294] pfkB family carbohydrate kinase; [PTHR10584] SUGAR KINASE
Mapoly0058s0011	25.9991	25	15	22	21.9998	1.3144	1	5	1	0	1.75	0.174391	0.0229009	-3.65205	2.68884	-3.80227	3.08654e-08	4.98995e-07
Mapoly0023s0108	41	47	49	84	55.25	1.11616	3	12	8	2	6.25	0.141312	0.0813815	-3.14404	4.27504	-3.39815	3.09124e-08	4.99336e-07	[K01637] isocitrate lyase [EC:4.1.3.1]; [PF00463] Isocitrate lyase family; [GO:0004451] isocitrate lyase activity; [PTHR21631:SF3] ISOCITRATE LYASE; [PTHR21631] ISOCITRATE LYASE/MALATE SYNTHASE; [KOG1260] Isocitrate lyase; [4.1.3.1] Isocitrate lyase.; [GO:0019752] carboxylic acid metabolic process
Mapoly0056s0131	7	18	20	6	12.75	4.92456	0	0	0	0	0	0	0	-19.5059	-15.2261	-20.0066	3.14034e-08	5.06843e-07
Mapoly0054s0079	38	89	57	77	65.25	2.6187	2	12	2	7	5.75	0.274356	0.183926	-3.50434	4.39866	-3.63228	3.15088e-08	5.08119e-07
Mapoly0113s0016	20	28	34	56	34.5	1.31131	5	3	5	3	4	0.121493	0.128493	-3.10852	3.58631	-3.45325	3.17382e-08	5.10964e-07
Mapoly0003s0128	102	153	117	140	128	5.46885	28	27	43	32	32.5	0.996904	1.41104	-1.97763	6.04878	-2.24322	3.32831e-08	5.34943e-07
Mapoly0109s0050	235	476	286	375	343	11.9236	146	97	109	81	108.25	3.47436	2.90348	-1.66384	7.61425	-1.9665	3.37802e-08	5.42481e-07	[GO:0008270] zinc ion binding; [PTHR23153] UBX-RELATED; [PF00641] Zn-finger in Ran binding protein and others; [PF08325] WLM domain
Mapoly0023s0127	20	23	23	24	22.5	1.12285	3	0	2	4	2.25	0.0535605	0.143928	-3.32192	2.87343	-3.57076	3.47303e-08	5.5545e-07
Mapoly0031s0151	233	277	233	271	253.5	7.81804	43	74	82	74	68.25	1.61744	2.17316	-1.89308	7.0927	-2.10822	3.48763e-08	5.57298e-07
Mapoly0006s0088	13	28	24	24	22.25	1.36527	0	4	0	0	1	0.120236	0	-4.47571	2.3794	-4.57518	3.49305e-08	5.57703e-07
Mapoly0006s0199	11	55	35	48	37.25	5.02285	3	1	0	4	2	0.205268	0.279058	-4.21916	3.21172	-4.44056	3.55255e-08	5.66264e-07
Mapoly0040s0087	35	43	33	47	39.5	7.71999	0	8	0	0	2	0.779969	0	-4.30377	3.27976	-4.3759	3.58781e-08	5.71413e-07
Mapoly0045s0060	12	22	19	34	21.75	1.67402	2	0	4	0	1.5	0.053766	0.112408	-3.85797	2.44874	-4.38945	3.60145e-08	5.73111e-07
Mapoly0020s0087	67	115	119	121	105.5	3.11163	7	2	15	23	11.75	0.101521	0.518938	-3.16651	5.21773	-3.38974	3.82628e-08	6.06887e-07
Mapoly0016s0046	519	998	1643	466	906.5	20.4054	274	283	297	184	259.5	5.26108	4.60871	-1.80457	8.96881	-2.11493	3.93694e-08	6.23926e-07	[PTHR19328] PQQ OXIDOREDUCTASE-RELATED; [GO:0005975] carbohydrate metabolic process; [GO:0016901] oxidoreductase activity, acting on the CH-OH group of donors, quinone or similar compound as acceptor; [PF07995] Glucose / Sorbosone dehydrogenase; [GO:0048038] quinone binding
Mapoly0145s0005	3	22	16	19	15	1.80589	0	0	0	0	0	0	0	-19.7404	-15.2261	-20.2709	3.94485e-08	6.24154e-07	[GO:0016758] transferase activity, transferring hexosyl groups; [PF00201] UDP-glucoronosyl and UDP-glucosyl transferase; [PTHR11926] GLUCOSYL/GLUCURONOSYL TRANSFERASES; [GO:0008152] metabolic process
Mapoly0073s0023	26	62	46	35	42.25	2.92263	2	1	0	8	2.75	0.0831459	0.292716	-3.94144	3.56963	-4.02629	3.99005e-08	6.30788e-07
Mapoly0176s0012	119	123	120	154	129	2.04523	20	31	38	33	30.5	0.358573	0.505224	-2.08049	6.02276	-2.30684	4.02521e-08	6.35825e-07
Mapoly0097s0051	5	11	22	12	12.5	2.37538	0	0	0	0	0	0	0	-19.4774	-15.2261	-20.0099	4.1544e-08	6.55158e-07
Mapoly0060s0025	22	43	44	29	34.5	1.70784	8	0	0	3	2.75	0.139802	0.0782573	-3.64908	3.27838	-4.03539	4.30892e-08	6.77864e-07
Mapoly0096s0055	12	32	36	25	26.25	1.6844	0	4	1	0	1.25	0.124439	0.0233613	-4.3923	2.63186	-4.57914	4.32079e-08	6.79177e-07
Mapoly0031s0057	144	217	180	204	186.25	6.83502	19	47	52	42	40	1.10297	1.52919	-2.21917	6.49484	-2.44071	4.35302e-08	6.83687e-07	[PF01753] MYND finger
Mapoly0001s0356	75	122	115	140	113	5.29433	34	23	37	17	27.75	1.09033	1.0579	-2.02576	5.82623	-2.36423	4.37406e-08	6.86432e-07
Mapoly0074s0072	96	45	43	36	55	1.84858	5	12	1	1	4.75	0.277393	0.0323568	-3.53343	4.03918	-3.64625	4.39067e-08	6.88478e-07
Mapoly0011s0035	4	24	24	18	17.5	4.48509	1	0	1	0	0.5	0.0881463	0.0921434	-5.12924	1.50585	-5.69769	4.45209e-08	6.96977e-07
Mapoly0192s0003	76	182	142	130	132.5	1.87695	6	29	25	17	19.25	0.225224	0.253384	-2.78306	5.73561	-3.00615	4.6178e-08	7.21746e-07	[PTHR31540] FAMILY NOT NAMED
Mapoly0023s0104	651	1251	992	1107	1000.25	25.8597	332	522	261	218	333.25	9.67696	5.46846	-1.58568	9.23164	-1.83731	4.64576e-08	7.25529e-07
Mapoly0115s0014	11	34	26	41	28	4.3618	0	4	1	0	1.25	0.30095	0.0564979	-4.48541	2.68021	-4.67584	4.70269e-08	7.33825e-07
Mapoly0068s0051	5	20	15	29	17.25	1.59807	0	0	1	0	0.25	0	0.0333226	-6.10843	1.01181	-6.63788	4.72092e-08	7.36075e-07
Mapoly0003s0083	128	113	66	114	105.25	3.32126	21	35	16	12	21	0.807687	0.40126	-2.32536	5.58509	-2.52218	4.90003e-08	7.62767e-07	[PF13855] Leucine rich repeat; [PF13516] Leucine Rich repeat; [GO:0005515] protein binding
Mapoly0009s0243	7	14.623	10.9548	24.8493	14.3568	1.18164	0	0	1	0	0.25	0	0.0299271	-5.84356	0.871266	-6.35678	4.94389e-08	7.68189e-07
Mapoly0008s0103	86	67	86	71	77.5	4.99197	27	21	17	11	19	1.31173	0.797557	-2.0282	5.272	-2.30738	5.12721e-08	7.95563e-07
Mapoly0110s0024	263	228	243	275	252.25	2.606	4	61	22	10	24.25	0.331437	0.141365	-3.3788	6.36881	-3.52839	5.15875e-08	7.99814e-07	[PF13855] Leucine rich repeat; [GO:0005524] ATP binding; [KOG1187] Serine/threonine protein kinase; [PF00069] Protein kinase domain; [GO:0005515] protein binding; [GO:0004672] protein kinase activity; [PF00560] Leucine Rich Repeat; [GO:0006468] protein phosphorylation; [PTHR24420] LEUCINE-RICH REPEAT RECEPTOR-LIKE PROTEIN KINASE
Mapoly0117s0033	565	795	1302	932	898.5	24.9776	241	159	429	337	291.5	4.49618	9.25323	-1.62402	9.04923	-1.92516	5.30307e-08	8.2087e-07	[2.6.1.5] Tyrosine transaminase.; [GO:0009058] biosynthetic process; [PTHR11751:SF28] TYROSINE AMINOTRANSFERASE; [GO:0030170] pyridoxal phosphate binding; [PF00155] Aminotransferase class I and II; [K00815] tyrosine aminotransferase [EC:2.6.1.5]; [PTHR11751] SUBGROUP I AMINOTRANSFERASE RELATED; [KOG0259] Tyrosine aminotransferase
Mapoly0079s0032	324.082	422.945	293.901	355.14	349.017	9.04107	20.5849	90.8775	44.6669	84.3058	60.1088	1.37351	1.61111	-2.53765	7.27077	-2.66439	5.34204e-08	8.26238e-07	[PTHR10331:SF6] CENTROMERE PROTEIN J; [K11502] centromere protein J; [PTHR10331] T COMPLEX PROTEIN 10
Mapoly0014s0061	6	13	12	8	9.75	6.21232	0	0	0	0	0	0	0	-19.1189	-15.2261	-19.6129	5.42157e-08	8.37867e-07
Mapoly0043s0123	115	202	187	196	175	27.1456	40	32	25	53	37.5	4.62818	5.76144	-2.22239	6.41277	-2.45076	5.52014e-08	8.52417e-07
Mapoly0070s0017	6	22	16	23	16.75	2.70135	1	0	1	1	0.75	0.0559391	0.141978	-4.4811	1.86115	-4.83283	5.58488e-08	8.61036e-07
Mapoly0029s0110	570	635	528	892	656.25	15.3168	79	261	70	123	133.25	3.6849	2.13914	-2.30011	8.29712	-2.46036	5.59613e-08	8.62082e-07	[GO:0016020] membrane; [PF03254] Xyloglucan fucosyltransferase; [GO:0042546] cell wall biogenesis; [GO:0008107] galactoside 2-alpha-L-fucosyltransferase activity; [PTHR31889] FAMILY NOT NAMED
Mapoly0134s0037	9	17	14	8	12	1.1463	1	0	0	0	0.25	0.0341326	0	-5.58487	0.687691	-6.13496	5.71429e-08	8.7888e-07
Mapoly0138s0001	36	106	74	100	79	4.74112	22	12	14	6	13.5	0.811756	0.494778	-2.54889	5.04301	-2.92307	5.74248e-08	8.82512e-07	[PF07080] Protein of unknown function (DUF1348); [PTHR31757] FAMILY NOT NAMED; [PTHR31757:SF0] SUBFAMILY NOT NAMED
Mapoly0187s0014	43	91	83	57	68.5	8.3407	19	10	17	10	14	1.41686	1.40728	-2.29068	4.97028	-2.62682	5.88938e-08	9.02929e-07
Mapoly0023s0037	25	80	74	86	66.25	2.61615	12	10	8	1	7.75	0.354575	0.134815	-3.09565	4.52226	-3.48274	6.17226e-08	9.44797e-07	[PTHR11014:SF8] AMINOACYLASE-1; [GO:0016787] hydrolase activity; [PF07687] Peptidase dimerisation domain; [PTHR11014] PEPTIDASE M20 FAMILY MEMBER; [GO:0008152] metabolic process; [PF01546] Peptidase family M20/M25/M40; [KOG2275] Aminoacylase ACY1 and related metalloexopeptidases
Mapoly0039s0088	389.284	974.183	578.349	1014.94	739.189	7.1764	352.699	253.632	258.59	180.356	261.319	2.40593	1.83925	-1.50013	8.81268	-1.82081	6.20721e-08	9.49393e-07	[KOG0978] E3 ubiquitin ligase involved in syntaxin degradation
Mapoly0104s0004	7	13	7	10	9.25	5.72417	0	0	0	0	0	0	0	-19.043	-15.2261	-19.5171	6.25842e-08	9.56468e-07	[PF14215] bHLH-MYC and R2R3-MYB transcription factors N-terminal; [PTHR13902:SF23] PREDICTED: HYPOTHETICAL PROTEIN; [PTHR13902] SERINE/THREONINE-PROTEIN KINASE WNK (WITH NO LYSINE)-RELATED
Mapoly0023s0018	384	782	710	698	643.5	41.5618	397	171	227	112	226.75	14.4316	9.19191	-1.50484	8.58174	-1.87903	6.35432e-08	9.70355e-07
Mapoly0004s0197	19	49	34	47	37.25	1.5015	2	7	0	2	2.75	0.165984	0.0421932	-3.75973	3.45588	-3.91841	6.52217e-08	9.94413e-07
Mapoly0001s0319	393	327	282	567	392.25	10.7966	72	83	100	146	100.25	1.85486	3.18938	-1.96817	7.69434	-2.1605	6.6182e-08	1.00746e-06
Mapoly0019s0047	15	13	3	12	10.75	1.35261	0	0	0	0	0	0	0	-19.2598	-15.2261	-19.6695	6.71108e-08	1.02079e-06
Mapoly0124s0015	8	16	9	14	11.75	1.67052	0	0	0	1	0.25	0	0.0754166	-5.55449	0.963275	-5.53503	6.96467e-08	1.05853e-06
Mapoly0143s0015	22	31	30	23	26.5	1.11059	1	4	6	1	3	0.0983757	0.116296	-3.14295	3.18002	-3.43431	7.07283e-08	1.07412e-06
Mapoly0063s0088	17	37	31	30	28.75	1.18678	1	2	3	5	2.75	0.0550324	0.15415	-3.38605	3.25066	-3.56903	7.33313e-08	1.11278e-06
Mapoly0064s0009	67	141	122	132	115.5	9.50261	41	8	29	8	21.5	1.50781	1.22208	-2.42548	5.61353	-2.86175	7.36959e-08	1.11655e-06	[GO:0009607] response to biotic stimulus; [PTHR31213] FAMILY NOT NAMED; [PF00407] Pathogenesis-related protein Bet v I family; [GO:0006952] defense response
Mapoly0053s0078	76	82	72	82	78	4.8341	28	14	19	20	20.25	1.06035	1.11008	-1.94555	5.33252	-2.21888	7.54008e-08	1.13881e-06
Mapoly0068s0028	60	67	71	60	64.5	2.01616	19	14	21	10	16	0.431819	0.389253	-2.01123	5.01534	-2.31726	7.8418e-08	1.18345e-06	[GO:0016567] protein ubiquitination; [GO:0004842] ubiquitin-protein ligase activity; [PF04564] U-box domain
Mapoly0005s0035	66	68	63	57	63.5	1.04463	2	11	14	13	10	0.10313	0.202774	-2.66675	4.72043	-2.83589	7.9566e-08	1.1961e-06	[PF04632] Fusaric acid resistance protein family; [PTHR30509] P-HYDROXYBENZOIC ACID EFFLUX PUMP SUBUNIT-RELATED; [GO:0005886] plasma membrane; [GO:0006810] transport
Mapoly0139s0002	196	202	188	187	193.25	13.9702	51	69	59	56	58.75	3.84017	3.79356	-1.71781	6.7791	-1.93636	8.34719e-08	1.25383e-06	[PTHR10516] PEPTIDYL-PROLYL CIS-TRANS ISOMERASE; [KOG0552] FKBP-type peptidyl-prolyl cis-trans isomerase; [GO:0006457] protein folding; [PTHR10516:SF142] SUBFAMILY NOT NAMED; [PF00254] FKBP-type peptidyl-prolyl cis-trans isomerase
Mapoly1380s0001	69	172	147	183	142.75	8.94493	1	22	2	10	8.75	0.691651	0.372183	-4.02806	5.29025	-4.13955	8.44683e-08	1.26781e-06	[PTHR24413] FAMILY NOT NAMED; [PF00651] BTB/POZ domain; [GO:0005515] protein binding
Mapoly0028s0081	9	10	10	19	12	7.22945	2	0	0	0	0.5	0.425115	0	-4.58492	1.19537	-5.15032	8.66939e-08	1.30021e-06
Mapoly0028s0061	15	43	42	59	39.75	1.46059	3	4	5	5	4.25	0.108769	0.161097	-3.22541	3.77999	-3.49995	8.68146e-08	1.30061e-06
Mapoly0047s0006	7	55	30	64	39	2.58303	2	3	1	2	2	0.140481	0.0916827	-4.28539	3.24006	-4.54094	9.07961e-08	1.35541e-06	[GO:0055114] oxidation-reduction process; [K00430] peroxidase [EC:1.11.1.7]; [PF00141] Peroxidase; [GO:0020037] heme binding; [PTHR31235] FAMILY NOT NAMED; [1.11.1.7] Peroxidase.; [GO:0006979] response to oxidative stress; [GO:0004601] peroxidase activity
Mapoly0069s0044	128	192	162	141	155.75	3.6991	9	35	28	36	27	0.483528	0.697864	-2.5282	6.1033	-2.6947	9.17445e-08	1.3685e-06	[PF14310] Fibronectin type III-like domain; [PF00933] Glycosyl hydrolase family 3 N terminal domain; [GO:0004553] hydrolase activity, hydrolyzing O-glycosyl compounds; [GO:0005975] carbohydrate metabolic process; [PTHR30620] PERIPLASMIC BETA-GLUCOSIDASE-RELATED; [PF01915] Glycosyl hydrolase family 3 C-terminal domain
Mapoly0030s0081	9	14	7	30	15	1.19706	1	0	1	0	0.5	0.0279406	0.0292076	-4.90684	1.37957	-5.44514	9.27425e-08	1.38232e-06
Mapoly0001s0488	23	103	64	75	66.25	3.87626	6	9	9	10	8.5	0.377755	0.496141	-2.96238	4.64835	-3.21402	9.28397e-08	1.3827e-06	[PF01453] D-mannose binding lectin
Mapoly0140s0035	28	54	64	59	51.25	1.69075	4	7	1	9	5.25	0.158359	0.166833	-3.28716	4.15907	-3.4455	9.35952e-08	1.39288e-06
Mapoly0068s0010	510	642	429	712	573.25	21.7761	24	107	75	167	93.25	2.35701	4.46577	-2.61999	7.95567	-2.73869	9.45682e-08	1.40519e-06
Mapoly0040s0086	11	20	42	16	22.25	1.98096	0	3	0	0	0.75	0.12879	0	-4.89074	2.18445	-5.01535	9.48981e-08	1.40901e-06
Mapoly0025s0058	6	27	17	17	16.75	2.48777	2	1	0	0	0.75	0.175895	0	-4.4811	1.8246	-4.88906	9.54366e-08	1.41482e-06
Mapoly0030s0089	17	27	17	18	19.75	2.01817	3	1	3	2	2.25	0.16156	0.225176	-3.13385	2.73877	-3.44642	9.60127e-08	1.42118e-06
Mapoly0008s0114	164	229	120	188	175.25	5.70287	7	49	17	7	20	0.884905	0.332024	-3.13134	5.9573	-3.29403	9.65342e-08	1.4278e-06
Mapoly0051s0102	228	286	195.999	257	241.75	2.37513	51	90	78	61	70	0.625581	0.611967	-1.78809	7.06926	-2.00615	9.6929e-08	1.43254e-06	[PF00225] Kinesin motor domain; [GO:0005524] ATP binding; [PTHR24115] FAMILY NOT NAMED; [KOG0243] Kinesin-like protein; [GO:0005871] kinesin complex; [GO:0007018] microtubule-based movement; [GO:0008017] microtubule binding; [K10395] kinesin family member 4/7/21/27; [GO:0003777] microtubule motor activity
Mapoly0178s0021	107	171	130	150	139.5	19.5464	21	39	34	35	32.25	3.75932	4.38328	-2.11289	6.13283	-2.32788	1.01124e-07	1.49226e-06	[PTHR16305] TESTICULAR SOLUBLE ADENYLYL CYCLASE
Mapoly0104s0044	539	690	461	559	562.25	6.42203	2	78	4	7	22.75	0.456729	0.0604166	-4.62727	6.93539	-4.70349	1.02192e-07	1.50687e-06	[PF04998] RNA polymerase Rpb1, domain 5; [GO:0003677] DNA binding; [PF00623] RNA polymerase Rpb1, domain 2; [PTHR19376] DNA-DIRECTED RNA POLYMERASE; [PF05000] RNA polymerase Rpb1, domain 4; [PF04997] RNA polymerase Rpb1, domain 1; [GO:0006351] transcription, DNA-dependent; [KOG0260] RNA polymerase II, large subunit; [GO:0003899] DNA-directed RNA polymerase activity; [PF04983] RNA polymerase Rpb1,…
Mapoly0047s0133	27	87	58	76	62	3.10684	7	1	9	11	7	0.146955	0.45228	-3.14684	4.43658	-3.43715	1.03247e-07	1.52125e-06
Mapoly0002s0282	97.2223	152.758	104.237	168.518	130.684	2.1143	41.7624	27.1591	41.7405	31.1109	35.4432	0.463914	0.519109	-1.8825	6.11632	-2.17884	1.07083e-07	1.57537e-06
Mapoly0001s0220	8	12	5	10	8.75	2.43515	0	0	0	0	0	0	0	-18.9628	-15.2261	-19.4204	1.14431e-07	1.68091e-06
Mapoly0001s0106	265	520	436	411	408	5.93208	204	112	163	60	134.75	1.85073	1.33674	-1.59828	7.87659	-1.95986	1.26642e-07	1.85182e-06	[GO:0005622] intracellular; [GO:0003779] actin binding; [K05765] cofilin; [PF00241] Cofilin/tropomyosin-type actin-binding protein; [GO:0015629] actin cytoskeleton; [PTHR11913] COFILIN-RELATED; [GO:0030042] actin filament depolymerization; [KOG1735] Actin depolymerizing factor
Mapoly0134s0011	287.848	227.664	213.531	294.557	255.9	9.23472	33.0052	88.1046	78.7083	62.6658	65.621	2.03868	2.30282	-1.96335	7.06854	-2.15235	1.45508e-07	2.11326e-06
Mapoly0004s0152	79	99	75	102	88.75	4.89261	39	11	27	15	23	1.07391	1.0008	-1.94811	5.48445	-2.29995	1.68313e-07	2.42439e-06
Mapoly0114s0036	225.049	369.785	226.368	334.687	288.972	15.1326	34.2121	86.8455	36.2176	76.1953	58.3676	2.54734	2.6201	-2.30769	7.11123	-2.46468	1.70273e-07	2.45079e-06	[PTHR23084] PHOSPHATIDYLINOSITOL-4-PHOSPHATE 5-KINASE RELATED; [PF02493] MORN repeat
Mapoly0006s0091	9	21	32	20	20.5	1.20816	4	0	0	1	1.25	0.0816155	0.0304575	-4.03561	2.32532	-4.49649	1.72524e-07	2.47949e-06
Mapoly3107s0001	168	104	107	93	118	3.36093	33	38	34	31	34	0.907495	0.864367	-1.79518	6.00333	-1.98768	1.73086e-07	2.4857e-06	[PF14111] Domain of unknown function (DUF4283)
Mapoly0041s0108	124	126	112	81	110.75	4.50755	31	36	27	28	30.5	1.2043	1.03959	-1.86042	5.89477	-2.07154	1.73626e-07	2.49161e-06	[PTHR32133] FAMILY NOT NAMED; [PF12937] F-box-like; [GO:0005515] protein binding
Mapoly0016s0020	6	29	49	26	27.5	2.73756	2	0	2	2	1.5	0.0679026	0.172342	-4.19638	2.73223	-4.57499	1.74581e-07	2.50345e-06
Mapoly0057s0017	434	800	516	649	599.75	10.7684	123	254	201	195	193.25	3.04772	3.20511	-1.63389	8.47712	-1.84883	1.78792e-07	2.55813e-06
Mapoly0026s0038	3	16	11	15	11.25	2.03041	0	0	0	0	0	0	0	-19.3254	-15.2261	-19.85	1.82119e-07	2.60187e-06
Mapoly0009s0183	16	22	31	20	22.25	1.34878	3	2	3	3	2.75	0.123747	0.1629	-3.01629	3.01392	-3.29931	1.82956e-07	2.6119e-06
Mapoly0003s0210	6	16	20	15	14.25	23.0963	0	0	1	1	0.5	0	1.42593	-4.83284	1.50643	-5.08062	1.88509e-07	2.68719e-06
Mapoly0014s0110	11	11	5	6	8.25	1.1941	0	0	0	0	0	0	0	-18.8779	-15.2261	-19.2927	1.89341e-07	2.69706e-06
Mapoly0056s0028	6	38	21	39	26	1.17743	0	0	0	3	0.75	0	0.0694728	-5.11545	2.34998	-5.13851	1.95188e-07	2.77624e-06
Mapoly0073s0021	108	184	172	191	163.75	3.49171	48	55	22	26	37.75	0.940804	0.467759	-2.11695	6.35168	-2.38232	2.0544e-07	2.91991e-06	[KOG3000] Microtubule-binding protein involved in cell cycle control; [GO:0005515] protein binding; [PTHR10623:SF6] MICROTUBULE-ASSOCIATED PROTEIN EB1 (MICROTUBULE PLUS-END BINDING PROTEIN); [PF03271] EB1-like C-terminal motif; [GO:0008017] microtubule binding; [PTHR10623] MICROTUBULE-ASSOCIATED PROTEIN RP/EB FAMILY MEMBER; [PF00307] Calponin homology (CH) domain
Mapoly0167s0021	9	35	25	33	25.5	1.33182	2	2	4	0	2	0.0867464	0.0758171	-3.67241	2.83488	-4.09594	2.10855e-07	2.98807e-06
Mapoly0020s0062	10	23	21	25	19.75	1.72729	3	0	2	2	1.75	0.0916327	0.155047	-3.49641	2.57042	-3.87034	2.11097e-07	2.98839e-06	[PF01753] MYND finger
Mapoly0057s0116	30	35	37	32	33.5	1.82317	5	0	7	7	4.75	0.0974318	0.346205	-2.81816	3.6815	-3.10149	2.11188e-07	2.98839e-06
Mapoly0085s0034	763	1345	1104	861	1018.25	48.1908	331	179	341	534	346.25	9.7908	19.4672	-1.55621	9.27214	-1.78472	2.14111e-07	3.02754e-06
Mapoly0144s0020	118	130	146	155	137.25	5.84611	33	19	56	39	36.75	0.798372	1.56398	-1.90099	6.17788	-2.1906	2.15183e-07	3.03825e-06
Mapoly0052s0115	8	12	12	18	12.5	2.58627	1	0	0	1	0.5	0.0726229	0.108406	-4.64381	1.38706	-4.90111	2.15557e-07	3.04129e-06
Mapoly0031s0054	5	48	29	64	36.5	2.02749	5	0	1	0	1.5	0.0949003	0.0198407	-4.60485	2.81981	-5.20454	2.17208e-07	3.06234e-06	[PF00657] GDSL-like Lipase/Acylhydrolase; [PTHR22835] ZINC FINGER FYVE DOMAIN CONTAINING PROTEIN; [GO:0016788] hydrolase activity, acting on ester bonds; [GO:0006629] lipid metabolic process
Mapoly0029s0130	257	489	332	416	373.5	6.46176	15	83	71	89	64.5	0.829461	1.18276	-2.53374	7.37067	-2.70437	2.27785e-07	3.20444e-06	[PF00010] Helix-loop-helix DNA-binding domain; [GO:0046983] protein dimerization activity; [PTHR11514] MYC
Mapoly0179s0005	15	31	8	29	20.75	1.05015	0	1	0	3	1	0.0252054	0.0810838	-4.37502	2.35538	-4.36982	2.27969e-07	3.20469e-06
Mapoly0065s0057	16	42	27	32	29.25	1.19999	4	2	8	2	4	0.098103	0.164103	-2.87036	3.43124	-3.25555	2.28901e-07	3.21546e-06	[PF12138] Spherulation-specific family 4
Mapoly0067s0036	17	32	18	38	26.25	1.4097	5	1	3	4	3.25	0.121322	0.172851	-3.0138	3.23612	-3.32294	2.3307e-07	3.26687e-06	[PTHR22731] RIBONUCLEASE P/MRP SUBUNIT
Mapoly0178s0003	74	151	106	148	119.75	5.15799	8	36	11	13	17	0.88334	0.469744	-2.81642	5.59201	-2.99665	2.47101e-07	3.451e-06	[PF00564] PB1 domain; [GO:0005515] protein binding
Mapoly0007s0054	10	8	21	4	10.75	1.03226	0	0	0	0	0	0	0	-19.2598	-15.2261	-19.7445	2.59087e-07	3.60796e-06
Mapoly0037s0013	7	26	19	34	21.5	2.0303	1	1	1	2	1.25	0.078003	0.13144	-4.10432	2.47305	-4.34107	2.62218e-07	3.64892e-06
Mapoly0020s0048	29	73	50	64	54	2.04318	9	8	8	12	9.25	0.267857	0.349517	-2.54543	4.55151	-2.79115	2.63897e-07	3.66699e-06
Mapoly2566s0001	4	11	13	9	9.25	1.68892	0	0	0	0	0	0	0	-19.043	-15.2261	-19.5609	2.66423e-07	3.69676e-06
Mapoly0005s0069	17	39	35	39	32.5	3.04414	9	4	4	3	5	0.477493	0.283828	-2.70044	3.68964	-3.06378	2.70893e-07	3.75307e-06
Mapoly0004s0291	181	210	229	338	239.5	9.71673	40	64	48	78	57.5	1.85002	2.38767	-2.05839	6.95772	-2.26134	2.71065e-07	3.75307e-06	[GO:0016020] membrane; [PTHR11654] OLIGOPEPTIDE TRANSPORTER-RELATED; [PF00854] POT family; [KOG1237] H+/oligopeptide symporter; [GO:0006810] transport; [GO:0005215] transporter activity
Mapoly0024s0075	53	101	66	69	72.25	1.98428	15	14	15	20	16	0.338069	0.446687	-2.17492	5.14383	-2.40364	2.71416e-07	3.75524e-06
Mapoly0039s0007	5	29	18	36	22	1.7514	1	2	0	0	0.75	0.103581	0	-4.87444	2.10944	-5.14682	2.73464e-07	3.77815e-06	[PF14886] FAM183A and FAM183B related
Mapoly0077s0023	10	10	8	8	9	1.08484	0	0	1	0	0.25	0	0.0459177	-5.16983	0.501517	-5.61729	2.7435e-07	3.78768e-06
Mapoly0042s0053	18	33	34	28	28.25	1.96296	4	4	6	4	4.5	0.234312	0.299811	-2.65025	3.53863	-2.94202	2.76311e-07	3.81202e-06
Mapoly0031s0120	36	69	47	65	54.25	3.94402	10	15	4	4	8.25	0.795065	0.261381	-2.71715	4.45976	-2.9663	2.84886e-07	3.91911e-06
Mapoly0034s0005	32	120	64	101	79.25	2.45147	2	6	5	16	7.25	0.111961	0.314828	-3.45035	4.71473	-3.58717	2.91231e-07	4.00069e-06
Mapoly0015s0208	219	261	203	208	222.75	5.37091	47	67	78	79	67.75	1.22271	1.7387	-1.71713	6.98966	-1.92297	2.94313e-07	4.04015e-06	[PTHR24110] FAMILY NOT NAMED
Mapoly0066s0037	89	152	118	109	117	7.41382	14	17	19	39	22.25	0.851412	1.76493	-2.39463	5.75805	-2.56783	2.96408e-07	4.06602e-06
Mapoly0067s0073	71	106	303	71	137.75	2.69437	25	18	19	24	21.5	0.338483	0.376551	-2.67964	5.83512	-2.98196	2.98146e-07	4.08423e-06	[GO:0016021] integral to membrane; [KOG1162] Predicted small molecule transporter; [PF03124] EXS family; [PTHR10783] XENOTROPIC AND POLYTROPIC RETROVIRUS RECEPTOR 1-RELATED; [PF03105] SPX domain
Mapoly0069s0021	59	37	50	44	47.5	1.30895	11	13	2	5	7.75	0.292648	0.0960945	-2.61566	4.29893	-2.81781	2.98159e-07	4.08423e-06
Mapoly0085s0065	173	259	333	324	272.25	6.78406	84	72	102	85	85.75	1.60975	2.04033	-1.66672	7.30592	-1.95824	3.10588e-07	4.24243e-06	[GO:0016020] membrane; [PTHR11654] OLIGOPEPTIDE TRANSPORTER-RELATED; [PF00854] POT family; [KOG1237] H+/oligopeptide symporter; [GO:0006810] transport; [GO:0005215] transporter activity
Mapoly0151s0029	136	177	240	125	169.5	27.2711	33	60	31	35	39.75	6.66407	4.84124	-2.09226	6.42698	-2.31203	3.35446e-07	4.55617e-06
Mapoly0148s0004	5	42	42	43	33	1.8277	2	2	4	1	2.25	0.0904676	0.107297	-3.87446	3.14402	-4.27119	3.42771e-07	4.6491e-06
Mapoly0057s0009	70	224	203	218	178.75	4.27216	28	55	28	24	33.75	0.86741	0.539997	-2.40498	6.35905	-2.66778	3.43771e-07	4.65939e-06
Mapoly0067s0016	16	49	37	27	32.25	1.20896	5	1	2	6	3.5	0.0842819	0.14566	-3.20387	3.47394	-3.46021	3.59827e-07	4.86675e-06	[PF14769] Flagellar C1a complex subunit C1a-32
Mapoly0010s0161	5	23	14	16	14.5	4.66272	1	1	0	0	0.5	0.268176	0	-4.85793	1.46899	-5.1876	3.6602e-07	4.94704e-06
Mapoly0112s0042	87	236	469	41	208.25	11.6449	12	8	5	31	14	0.447776	0.996738	-3.89482	5.88102	-4.08137	3.6952e-07	4.99085e-06
Mapoly0310s0002	29	61	40	59	47.25	2.1332	5	13	3	4	6.25	0.368144	0.145157	-2.91838	4.18728	-3.12134	3.7185e-07	5.0153e-06
Mapoly0013s0022	5	26	8	17	14	1.97432	1	0	0	0	0.25	0.0495436	0	-5.80726	0.810199	-6.37998	3.84295e-07	5.16868e-06
Mapoly0060s0102	159	462	362	439	355.5	11.9199	143	96	128	63	107.5	3.14797	2.60107	-1.72551	7.63818	-2.07787	3.89119e-07	5.22264e-06	[PTHR12327:SF0] SUBFAMILY NOT NAMED; [PTHR12327] UNCHARACTERIZED; [GO:0071929] alpha-tubulin acetylation; [GO:0019799] tubulin N-acetyltransferase activity; [KOG4601] Uncharacterized conserved protein; [PF05301] Touch receptor neuron protein Mec-17
Mapoly0013s0169	155.793	387.359	443.997	347.852	333.75	7.27857	47.4555	62.4088	105.155	102.195	79.3036	1.01973	1.99246	-2.07331	7.42153	-2.33754	3.94121e-07	5.2861e-06	[PTHR31935] FAMILY NOT NAMED
Mapoly0093s0043	146	325	262	264	249.25	2.87689	50	93	57	55	63.75	0.730518	0.576156	-1.9671	7.04852	-2.20497	3.96136e-07	5.30207e-06
Mapoly0147s0017	83	120	125	122	112.5	8.48493	49	17	32	28	31.5	1.94121	2.0102	-1.8365	5.91233	-2.16625	4.10598e-07	5.48802e-06
Mapoly0090s0022	5	19	9	14	11.75	2.19075	1	0	0	0	0.25	0.120568	0	-5.55449	0.684615	-6.12881	4.13568e-07	5.51624e-06
Mapoly0107s0046	4	24	26	9	15.75	2.42263	0	1	0	0	0.25	0.0739862	0	-5.97718	1.14469	-6.10576	4.20813e-07	5.60513e-06
Mapoly0006s0024	78	193	152	168	147.75	5.26853	33	50	34	18	33.75	1.26154	0.78293	-2.1302	6.19398	-2.41642	4.25341e-07	5.65762e-06	[PF10184] Uncharacterized conserved protein (DUF2358)
Mapoly0126s0028	28	44	45	24	35.25	1.20209	8	8	3	4	5.75	0.232979	0.110873	-2.61599	3.8747	-2.87279	4.34485e-07	5.77527e-06
Mapoly0008s0257	97	133	136	164	132.5	8.88661	30	39	35	38	35.5	1.99904	2.21296	-1.9001	6.16272	-2.1414	4.36855e-07	5.79877e-06
Mapoly0214s0001	9	22	12	13	14	1.68668	0	0	1	2	0.75	0	0.172898	-4.22236	1.80674	-4.34995	4.37726e-07	5.80236e-06
Mapoly0161s0005	5	12	5	17	9.75	1.66259	0	0	0	0	0	0	0	-19.1189	-15.2261	-19.6215	4.48e-07	5.92632e-06
Mapoly0027s0166	3	11	10	15	9.75	1.01006	0	0	0	0	0	0	0	-19.1189	-15.2261	-19.6485	4.51365e-07	5.96266e-06
Mapoly0114s0027	139	138	127	118	130.5	9.48357	38	49	48	31	41.5	2.79936	2.54211	-1.65287	6.22903	-1.89233	4.54541e-07	6.00051e-06
Mapoly0087s0003	673	497	350	474	498.5	9.76795	261	194	146	48	162.25	3.85069	1.62618	-1.61937	8.1297	-1.89801	4.56417e-07	6.01703e-06	[PTHR31373] FAMILY NOT NAMED; [PF11443] Domain of unknown function (DUF2828)
Mapoly0095s0028	38	46	42	51	44.25	1.09375	7	14	9	6	9	0.233852	0.162127	-2.29768	4.37144	-2.53036	4.64187e-07	6.10694e-06
Mapoly0034s0008	12	13	15	12	13	3.73898	1	0	3	1	1.25	0.103071	0.477092	-3.37849	1.99135	-3.74823	4.69762e-07	6.17607e-06	[PTHR31374] FAMILY NOT NAMED; [PF02519] Auxin responsive protein
Mapoly0054s0022	123	242	147	208	180	3.00562	49	56	55	50	52.5	0.753101	0.783796	-1.77761	6.65286	-2.03162	4.88168e-07	6.40061e-06	[PTHR32083] FAMILY NOT NAMED
Mapoly0005s0146	18	26	21	23	22	1.59012	3	5	1	3	3	0.257217	0.14264	-2.87446	3.0993	-3.05805	4.89989e-07	6.42013e-06
Mapoly0039s0118	159	124	130	101	128.5	3.98604	35	51	40	16	35.5	1.20496	0.746847	-1.85588	6.09069	-2.09466	4.91914e-07	6.4366e-06	[PF13516] Leucine Rich repeat; [PTHR24106] FAMILY NOT NAMED
Mapoly0022s0178	148	1132	657	1235	793	25.4488	14	154	18	50	59	2.51893	1.03074	-3.74853	7.90103	-3.90891	5.08276e-07	6.63718e-06	[KOG1339] Aspartyl protease; [PF14543] Xylanase inhibitor N-terminal; [PTHR13683] ASPARTYL PROTEASES; [PF14541] Xylanase inhibitor C-terminal; [GO:0004190] aspartic-type endopeptidase activity; [GO:0006508] proteolysis
Mapoly0053s0076	114.973	108.471	65.2362	122.065	102.686	1.7665	15.2166	35	16.2571	22.1179	22.1479	0.400765	0.313461	-2.213	5.63601	-2.3707	5.1482e-07	6.71809e-06	[GO:0030992] intraflagellar transport particle B; [PTHR31432:SF0] SUBFAMILY NOT NAMED; [GO:0042073] intraflagellar transport; [GO:0048487] beta-tubulin binding; [PTHR31432] FAMILY NOT NAMED; [GO:0042384] cilium assembly
Mapoly0069s0068	4	21	21	9	13.75	1.60004	1	0	0	0	0.25	0.0403233	0	-5.78126	0.808633	-6.37685	5.16596e-07	6.73216e-06
Mapoly0120s0033	34	204	123	139	125	6.77778	30	17	32	14	23.25	1.01032	1.0232	-2.42662	5.77647	-2.80035	5.26659e-07	6.85403e-06
Mapoly0067s0009	50	108	56	94	77	1.26264	14	19	15	18	16.5	0.235412	0.247633	-2.22239	5.2195	-2.4504	5.36233e-07	6.97392e-06
Mapoly0006s0209	42	73	61	67	60.75	3.44743	14	18	17	7	14	0.785018	0.567197	-2.11746	4.89925	-2.41432	5.62865e-07	7.30059e-06	[KOG1187] Serine/threonine protein kinase; [PF07714] Protein tyrosine kinase; [GO:0004672] protein kinase activity; [GO:0006468] protein phosphorylation; [PTHR24420] LEUCINE-RICH REPEAT RECEPTOR-LIKE PROTEIN KINASE
Mapoly0049s0133	33	110	86	107	84	1.85024	22	18	18	12	17.5	0.360318	0.281234	-2.26303	5.30476	-2.5923	5.63356e-07	7.30152e-06
Mapoly0138s0026	55	143	140	134	118	2.73216	28	26	38	24	29	0.518064	0.609701	-2.02466	5.91757	-2.34066	5.63694e-07	7.30152e-06
Mapoly0089s0059	455	583	475	499	503	39.5871	289	32	148	116	146.25	9.43288	9.2723	-1.78212	8.06284	-2.14439	5.79433e-07	7.49532e-06
Mapoly0009s0027	37	124	104	118	95.75	10.2292	9	17	15	22	15.75	1.21204	1.80033	-2.60392	5.37686	-2.82886	5.83122e-07	7.53798e-06
Mapoly0004s0072	34	60	72	83	62.25	8.76223	6	17	11	8	10.5	1.45562	1.15019	-2.56768	4.75713	-2.81455	5.94234e-07	7.66621e-06
Mapoly0057s0115	26	45	48	58	44.25	1.29786	8	11	9	6	8.5	0.239369	0.188561	-2.38014	4.33329	-2.665	6.00826e-07	7.74608e-06
Mapoly0033s0103	37	98	66	64	66.25	3.42097	25	12	10	5	13	0.760511	0.326728	-2.34941	4.87708	-2.7189	6.08683e-07	7.83166e-06	[GO:0005199] structural constituent of cell wall; [GO:0009664] plant-type cell wall organization; [PF14368] Probable lipid transfer; [PTHR23201] EXTENSIN, PROLINE-RICH PROTEIN; [PF04554] Extensin-like region
Mapoly0075s0067	68	86	49	97	75	1.66508	12	18	15	21	16.5	0.335997	0.382955	-2.18442	5.20031	-2.37455	6.12756e-07	7.87881e-06	[PTHR12477] SYNOVIOLIN-RELATED; [KOG1734] Predicted RING-containing E3 ubiquitin ligase; [GO:0005515] protein binding; [PF13639] Ring finger domain; [GO:0008270] zinc ion binding
Mapoly0140s0017	45	92	80	97	78.5	3.81715	30	14	22	13	19.75	0.844625	0.723691	-1.99084	5.31587	-2.34662	6.18672e-07	7.94958e-06
Mapoly0064s0024	64	129	104	96	98.25	2.53398	15	26	29	24	23.5	0.467449	0.603927	-2.0638	5.64777	-2.30659	6.25618e-07	8.03348e-06	[PTHR15654] UNCHARACTERIZED; [PTHR15654:SF1] SUBFAMILY NOT NAMED; [PF13870] Domain of unknown function (DUF4201)
Mapoly0139s0026	62	73	62	72	67.25	4.16586	18	23	16	14	17.75	1.11292	0.837152	-1.92171	5.15259	-2.1596	6.65043e-07	8.51706e-06
Mapoly0029s0057	9	20	17	18	16	4.44354	3	0	1	2	1.5	0.292694	0.393264	-3.41502	2.31389	-3.75942	6.72397e-07	8.59981e-06
Mapoly0057s0036	23	61	32	48	41	3.03936	3	11	4	3	5.25	0.527821	0.24959	-2.96523	3.95681	-3.17088	6.7963e-07	8.68656e-06
Mapoly0020s0056	49	74	35	52	52.5	2.89152	18	6	1	1	6.5	0.52594	0.0506547	-3.0138	4.16677	-3.39096	7.10964e-07	9.06666e-06
Mapoly0012s0125	22	58	68	33	45.25	1.40066	15	3	2	3	5.75	0.20739	0.0710423	-2.97628	4.00448	-3.39734	7.11249e-07	9.06666e-06	[PTHR15599] RTDR1
Mapoly1199s0001	23	9	5	7	11	1.25806	0	0	1	0	0.25	0	0.0466388	-5.45934	0.596293	-5.80684	7.12986e-07	9.08281e-06
Mapoly0046s0037	25	49	35	43	38	4.22079	8	4	10	8	7.5	0.533652	0.880826	-2.34103	4.10962	-2.64017	7.16959e-07	9.12738e-06
Mapoly0001s0502	34	29	26	13	25.5	3.14121	3	4	5	4	4	0.391153	0.511187	-2.67242	3.35723	-2.86416	7.31636e-07	9.30196e-06
Mapoly0105s0019	133	116	60	89	99.5	2.8877	35	13	45	17	27.5	0.572064	0.780217	-1.85526	5.67157	-2.15539	7.67987e-07	9.74485e-06	[PF00484] Carbonic anhydrase; [KOG1578] Predicted carbonic anhydrase involved in protection against oxidative damage; [4.2.1.1] Carbonate dehydratase.; [GO:0008270] zinc ion binding; [GO:0004089] carbonate dehydratase activity; [K01673] carbonic anhydrase [EC:4.2.1.1]; [PTHR11002] FAMILY NOT NAMED
Mapoly0104s0037	204	454	334	415	351.75	34.141	86	111	94	126	104.25	8.22055	9.78682	-1.7545	7.65444	-1.98763	7.74495e-07	9.80806e-06
Mapoly0037s0061	32.3829	51.0168	53.8585	46.6748	45.9832	1.39204	4.73012	4.94806	4.7945	13.7027	7.04385	0.124387	0.272649	-2.70667	4.2695	-2.87548	7.82244e-07	9.88025e-06
Mapoly0063s0032	22	69	45	43	44.75	1.04646	12	3	12	2	7.25	0.13311	0.127789	-2.62583	4.14241	-3.06609	8.41703e-07	1.06035e-05
Mapoly0186s0015	9	20	26	28	20.75	1.60802	0	0	1	4	1.25	0	0.188025	-4.05309	2.51074	-4.16113	8.44157e-07	1.06275e-05
Mapoly0065s0009	74	37	125	45	70.25	1.2911	6	18	2	4	7.5	0.204018	0.0529573	-3.22753	4.60565	-3.3983	8.95651e-07	1.1239e-05	[GO:0005524] ATP binding; [KOG1187] Serine/threonine protein kinase; [PF00069] Protein kinase domain; [GO:0004672] protein kinase activity; [GO:0006468] protein phosphorylation; [PTHR24420] LEUCINE-RICH REPEAT RECEPTOR-LIKE PROTEIN KINASE
Mapoly0006s0218	1011	1844	2520	1294	1667.25	26.1335	264	381	730	722	524.25	4.36659	10.1229	-1.66914	9.94205	-1.91544	9.45713e-07	1.18364e-05	[PTHR22891:SF0] SUBFAMILY NOT NAMED; [PTHR22891] EUKARYOTIC TRANSLATION INITIATION FACTOR 2C; [PF02171] Piwi domain; [GO:0005515] protein binding; [KOG1041] Translation initiation factor 2C (eIF-2C) and related proteins
Mapoly0173s0004	325	455	527	408	428.75	4.88293	96	215	136	72	129.75	1.59635	1.00815	-1.7244	7.93836	-1.97244	9.48431e-07	1.18628e-05	[PF14033] Protein of unknown function (DUF4246)
Mapoly0092s0080	141	157	294	89	170.25	10.6824	64	7	5	11	21.75	1.64229	0.482074	-2.96857	5.89402	-3.39707	9.52384e-07	1.19045e-05	[GO:0008168] methyltransferase activity; [PF03492] SAM dependent carboxyl methyltransferase; [PTHR31009] S-ADENOSYL-L-METHIONINE:CARBOXYL METHYLTRANSFERASE FAMILY PROTEIN
Mapoly0062s0097	5	16	8	5	8.5	4.71949	0	0	0	0	0	0	0	-18.921	-15.2261	-19.3992	9.55655e-07	1.19376e-05	[GO:0005515] protein binding; [PTHR19957] SYNTAXIN; [PF05739] SNARE domain
Mapoly0016s0047	38	254	238	63	148.25	12.1607	5	17	15	23	15	0.816086	1.42385	-3.305	5.67158	-3.50897	9.65113e-07	1.20402e-05	[PF14645] Chibby family
Mapoly0078s0050	3	16	8	9	9	1.32572	0	0	0	0	0	0	0	-19.0034	-15.2261	-19.5103	9.89973e-07	1.23105e-05
Mapoly0010s0136	108	135	160	136	134.75	3.82559	51	50	43	24	42	1.21634	0.814657	-1.68182	6.26268	-1.97825	9.91518e-07	1.23138e-05	[3.6.3.14] H(+)-transporting two-sector ATPase.; [PTHR10263] V-TYPE PROTON ATPASE PROTEOLIPID SUBUNIT; [PF00137] ATP synthase subunit C; [KOG0232] Vacuolar H+-ATPase V0 sector, subunits c/c'; [PTHR10263:SF2] V-TYPE PROTON ATPASE 16 KDA PROTEOLIPID SUBUNIT; [GO:0015078] hydrogen ion transmembrane transporter activity; [K02155] V-type H+-transporting ATPase 16kDa proteolipid subunit [EC:3.6.3.14]; …
Mapoly0085s0015	25	107	122	85	84.75	5.11953	0	16	4	1	5.25	0.463711	0.118131	-4.01282	4.52458	-4.20609	1.02097e-06	1.26552e-05	[PTHR31867] FAMILY NOT NAMED; [PF03330] Rare lipoprotein A (RlpA)-like double-psi beta-barrel; [PF01357] Pollen allergen
Mapoly0029s0040	106.691	126.722	74.8275	88.2147	99.1138	3.38319	31	28.8049	22.4441	31.5716	28.4551	0.885839	0.879499	-1.8004	5.76729	-2.0029	1.02963e-06	1.27461e-05
Mapoly0138s0021	28	9.00001	3	11	12.75	1.81356	0	1.00003	0	0	0.250007	0.0777032	0	-5.67229	0.897402	-5.6111	1.03354e-06	1.27863e-05
Mapoly0004s0273	76	99	73	76	81	2.06929	19	32	18	14	20.75	0.585677	0.36603	-1.96481	5.40189	-2.18572	1.06618e-06	1.31647e-05	[KOG1375] Beta tubulin; [PF00091] Tubulin/FtsZ family, GTPase domain; [GO:0005874] microtubule; [K07375] tubulin beta; [PTHR11588] TUBULIN; [GO:0007017] microtubule-based process; [PF03953] Tubulin C-terminal domain; [GO:0006184] GTP catabolic process; [GO:0003924] GTPase activity; [GO:0051258] protein polymerization; [GO:0043234] protein complex; [GO:0005525] GTP binding
Mapoly0031s0183	64	132	135	95	106.5	3.56091	9	15	25	32	20.25	0.351729	0.869886	-2.39486	5.62186	-2.60855	1.09426e-06	1.3477e-05	[PF01466] Skp1 family, dimerisation domain; [GO:0006511] ubiquitin-dependent protein catabolic process; [KOG1724] SCF ubiquitin ligase, Skp1 component; [PTHR11165] SKP1; [PF03931] Skp1 family, tetramerisation domain; [PTHR11165:SF24] SKP1
Mapoly0036s0114	15	18	22	17	18	1.44746	5	1	2	3	2.75	0.182998	0.18806	-2.71049	2.83046	-3.02835	1.12078e-06	1.37772e-05
Mapoly0092s0021	25	42	27	51	36.25	3.68759	4	9	8	1	5.5	0.595153	0.354871	-2.72047	3.85148	-3.01944	1.17615e-06	1.44487e-05
Mapoly0038s0052	32	94	109	82	79.25	2.87305	18	12	23	16	17.25	0.436225	0.602417	-2.19981	5.25569	-2.53232	1.21276e-06	1.48511e-05	[GO:0005506] iron ion binding; [KOG0156] Cytochrome P450 CYP2 subfamily; [GO:0055114] oxidation-reduction process; [GO:0016705] oxidoreductase activity, acting on paired donors, with incorporation or reduction of molecular oxygen; [GO:0020037] heme binding; [PTHR24298] FAMILY NOT NAMED; [PF00067] Cytochrome P450
Mapoly0150s0002	41	8	33	16	24.5	1.17965	1	2	4	3	2.5	0.0789088	0.180577	-3.29277	2.99082	-3.46492	1.23099e-06	1.50648e-05	[GO:0000287] magnesium ion binding; [GO:0016829] lyase activity; [PF03936] Terpene synthase family, metal binding domain; [GO:0010333] terpene synthase activity
Mapoly0103s0056	265	173	199	209	211.5	4.34148	53	91	66	65	68.75	1.34874	1.24621	-1.62123	6.95597	-1.80676	1.24449e-06	1.52106e-05
Mapoly0032s0055	8	76	41	54	44.75	2.95355	3	5	3	6	4.25	0.208488	0.250938	-3.39635	3.89156	-3.61995	1.25806e-06	1.53668e-05
Mapoly0008s0228	22	60	49	60	47.75	1.71032	2	5	10	10	6.75	0.111967	0.317154	-2.82254	4.25168	-3.05828	1.26788e-06	1.54769e-05
Mapoly0016s0185	456	345	393	372	391.5	33.6318	45	97	61	164	91.75	5.62663	9.64406	-2.09323	7.65327	-2.20432	1.28454e-06	1.56704e-05	[PF00657] GDSL-like Lipase/Acylhydrolase; [PTHR22835] ZINC FINGER FYVE DOMAIN CONTAINING PROTEIN; [GO:0016788] hydrolase activity, acting on ester bonds; [GO:0006629] lipid metabolic process
Mapoly0773s0001	6	16	15	16	13.25	1.38766	2	2	0	0	1	0.174476	0	-3.7279	1.90473	-4.05908	1.37758e-06	1.67418e-05	[PF00083] Sugar (and other) transporter; [GO:0016021] integral to membrane; [GO:0055085] transmembrane transport; [PTHR24064] FAMILY NOT NAMED; [GO:0022857] transmembrane transporter activity
Mapoly0003s0231	8	13	10	22	13.25	2.16258	0	2	1	0	0.75	0.159226	0.0597837	-4.14293	1.73948	-4.36766	1.38181e-06	1.67827e-05
Mapoly0140s0028	125	360	355	336	294	7.76371	143	45	106	47	85.25	1.88783	1.66128	-1.78604	7.31244	-2.19271	1.44981e-06	1.75533e-05	[KOG2944] Glyoxalase; [PTHR10374:SF1] LACTOYLGLUTATHIONE LYASE; [PTHR10374] LACTOYLGLUTATHIONE LYASE (GLYOXALASE I); [PF12681] Glyoxalase-like domain
Mapoly0044s0130	21	29	38	46	33.5	1.5634	0	1	7	7	3.75	0.0227268	0.290054	-3.15919	3.57345	-3.38342	1.45438e-06	1.75977e-05
Mapoly0045s0088	260	808	684	820	643	25.8956	370	169	212	77	207	8.4698	4.70962	-1.63519	8.51891	-2.0381	1.4564e-06	1.76111e-05
Mapoly0076s0051	10	26	12	14	15.5	1.36862	0	2	1	2	1.25	0.0877657	0.127065	-3.63225	2.25571	-3.73763	1.48122e-06	1.78663e-05
Mapoly0040s0121	31	84	68	66	62.25	1.88976	4	19	5	5	8.25	0.323965	0.135019	-2.91561	4.60284	-3.10899	1.5007e-06	1.80674e-05	[PF02797] Chalcone and stilbene synthases, C-terminal domain; [GO:0009058] biosynthetic process; [PF00195] Chalcone and stilbene synthases, N-terminal domain; [GO:0016746] transferase activity, transferring acyl groups; [PTHR11877] HYDROXYMETHYLGLUTARYL-COA SYNTHASE
Mapoly0101s0035	3	15	14	12	11	1.63352	0	0	1	0	0.25	0	0.0535544	-5.45934	0.68646	-5.98717	1.54949e-06	1.85852e-05
Mapoly0029s0014	6	14	4	7	7.75	2.03663	0	0	0	0	0	0	0	-18.7877	-15.2261	-19.2461	1.55682e-06	1.86479e-05
Mapoly0072s0058	39	18	51	34	35.5	2.23741	5	8	8	5	6.5	0.364763	0.357752	-2.4493	3.966	-2.6954	1.55859e-06	1.86479e-05
Mapoly0037s0037	10	42	33	43	32	2.54738	7	5	2	2	4	0.384183	0.139694	-2.99999	3.543	-3.34713	1.60011e-06	1.91328e-05
Mapoly0016s0158	12	23	16	38	22.25	1.49564	0	1	3	4	2	0.032681	0.213799	-3.47572	2.84434	-3.66291	1.80576e-06	2.14588e-05
Mapoly0021s0098	312	591	611	529	510.75	17.6473	309	57	161	35	140.5	4.71897	2.67994	-1.86205	8.0303	-2.31715	1.81806e-06	2.15917e-05	[PTHR24412] FAMILY NOT NAMED; [PF13854] Kelch motif; [GO:0005515] protein binding; [KOG4693] Uncharacterized conserved protein, contains kelch repeat; [PF01344] Kelch motif
Mapoly0003s0202	3	12	15	14	11	1.55927	0	0	0	1	0.25	0	0.0725494	-5.45934	0.942197	-5.49287	1.82011e-06	2.16027e-05
Mapoly0068s0086	19	37	30	23	27.25	2.03904	0	3	3	7	3.25	0.111101	0.361409	-3.06774	3.3574	-3.17544	1.83808e-06	2.17892e-05
Mapoly0062s0082	1	13	24	13	12.75	1.09626	0	0	0	0	0	0	0	-19.5059	-15.2261	-20.0667	1.85347e-06	2.19582e-05
Mapoly0097s0075	158.338	210.712	277.142	206.264	213.114	4.17036	58.8705	73.2674	83.8347	68.9435	71.229	1.1189	1.35984	-1.58109	6.99867	-1.84319	1.85475e-06	2.19598e-05
Mapoly0023s0105	15	18	12	18	15.75	1.66672	2	3	2	2	2.25	0.235665	0.19369	-2.80735	2.62172	-3.02092	1.86178e-06	2.20295e-05
Mapoly0080s0046	25	47	46	43	40.25	2.48333	4	11	3	7	6.25	0.419499	0.295087	-2.68706	4.08959	-2.86402	1.87235e-06	2.2141e-05
Mapoly0351s0001	3	10	7	11	7.75	1.34499	0	0	0	0	0	0	0	-18.7877	-15.2261	-19.3038	1.9386e-06	2.28683e-05	[PF00188] Cysteine-rich secretory protein family; [PTHR10334] CYSTEINE-RICH SECRETORY PROTEIN-RELATED
Mapoly0165s0016	104	171	441	50	191.5	14.7475	37	9	22	37	26.25	1.32451	2.09202	-2.86695	6.20657	-3.17825	1.95553e-06	2.30539e-05
Mapoly0006s0198	388	392	321	436	384.25	14.151	81	194	75	103	113.25	4.80841	3.10708	-1.76253	7.77258	-1.93311	1.98313e-06	2.33509e-05
Mapoly0013s0055	74	89	71	64	74.5	4.51693	14	21	20	25	20	0.948762	1.27775	-1.89724	5.32691	-2.08532	2.00524e-06	2.35967e-05	[PTHR13168:SF0] SUBFAMILY NOT NAMED; [GO:0006355] regulation of transcription, DNA-dependent; [PTHR13168] ASSOCIATE OF C-MYC (AMY-1); [GO:0003713] transcription coactivator activity
Mapoly0029s0072	14	14	19	28	18.75	1.66105	0	2	5	2	2.25	0.0868025	0.256035	-3.05888	2.74989	-3.33732	2.0673e-06	2.42679e-05
Mapoly0031s0101	60	96	82	90	82	2.24316	33	20	9	20	20.5	0.590775	0.381244	-2	5.40002	-2.27184	2.13633e-06	2.50173e-05	[PTHR15654:SF2] gb def: Hypothetical protein L2230.04; [PTHR15654] UNCHARACTERIZED; [PF13870] Domain of unknown function (DUF4201)
Mapoly0047s0013	176	308	240	300	256	3.7473	12	77	13	45	36.75	0.617864	0.418662	-2.80033	6.72099	-2.921	2.16108e-06	2.52764e-05	[PTHR11005] LYSOSOMAL ACID LIPASE-RELATED; [PF04083] Partial alpha/beta-hydrolase lipase region; [PTHR11005:SF19] TRIACYLGLYCEROL LIPASE; [KOG2624] Triglyceride lipase-cholesterol esterase; [PF00561] alpha/beta hydrolase fold; [GO:0006629] lipid metabolic process
Mapoly0081s0045	125	281	213	264	220.75	9.06258	24	88	30	14	39	2.11493	0.754412	-2.50087	6.61545	-2.72539	2.26989e-06	2.64848e-05	[PF13516] Leucine Rich repeat; [PTHR24106] FAMILY NOT NAMED
Mapoly0104s0043	1	13	11	25	12.5	1.50187	0	0	0	0	0	0	0	-19.4774	-15.2261	-20.0309	2.30971e-06	2.69006e-05	[PF00009] Elongation factor Tu GTP binding domain; [GO:0003924] GTPase activity; [PTHR23115] TRANSLATION FACTOR; [GO:0005525] GTP binding
Mapoly0025s0107	7	25	17	32	20.25	1.47698	4	2	1	1	2	0.171216	0.0640553	-3.33984	2.69696	-3.71433	2.34654e-06	2.73131e-05	[PF14226] non-haem dioxygenase in morphine synthesis N-terminal; [PTHR10209] OXIDOREDUCTASE, 2OG-FE(II) OXYGENASE FAMILY PROTEIN
Mapoly0075s0089	17	55	53	46	42.75	1.00188	12	9	4	3	7	0.199719	0.0705086	-2.61049	4.14978	-2.95664	2.36586e-06	2.75214e-05	[PTHR10543:SF27] SUBFAMILY NOT NAMED; [PF03055] Retinal pigment epithelial membrane protein; [PTHR10543] BETA-CAROTENE DIOXYGENASE; [KOG1285] Beta, beta-carotene 15,15'-dioxygenase and related enzymes
Mapoly0036s0049	21676	36410	28640	41132	31964.5	1455.99	4358	8282	8900	16536	9519	255.735	547.177	-1.74759	14.1868	-1.92291	2.38395e-06	2.7715e-05	[PTHR31718] FAMILY NOT NAMED; [PF06232] Embryo-specific protein 3, (ATS3)
Mapoly0059s0050	10	39	13	31	23.25	1.75677	5	2	3	0	2.5	0.206868	0.0833422	-3.21722	2.90006	-3.65972	2.40479e-06	2.79405e-05
Mapoly0070s0035	6	25	6	25	15.5	1.49061	0	2	0	0	0.5	0.0937785	0	-4.95415	1.62093	-5.05825	2.42819e-06	2.81666e-05
Mapoly0021s0022	58	59	311	29	114.25	1.60735	12	10	14	16	13	0.125182	0.186022	-3.13561	5.34891	-3.43792	2.57068e-06	2.96536e-05	[GO:0016020] membrane; [PF14570] RING/Ubox like zinc-binding domain; [PTHR13301] X-BOX TRANSCRIPTION FACTOR-RELATED; [GO:0016760] cellulose synthase (UDP-forming) activity; [GO:0030244] cellulose biosynthetic process; [PF03552] Cellulose synthase
Mapoly0033s0022	19	19	21	19	19.5	1.13937	3	3	7	1	3.5	0.150754	0.185079	-2.47804	3.03333	-2.82412	2.59724e-06	2.99186e-05
Mapoly0021s0041	587	820	687	1227	830.25	27.56	11	140	259	155	141.25	2.41242	5.88332	-2.55529	8.48574	-2.79381	2.63582e-06	3.03143e-05	[PF12142] Polyphenol oxidase middle domain; [PF00264] Common central domain of tyrosinase; [GO:0055114] oxidation-reduction process; [PTHR11474] TYROSINASE; [GO:0016491] oxidoreductase activity; [GO:0008152] metabolic process; [GO:0004097] catechol oxidase activity
Mapoly0001s0152	579	1514	1203	730	1006.5	32.6667	125	443	311	302	295.25	8.51095	8.90362	-1.76934	9.17368	-1.97407	2.66494e-06	3.06126e-05	[PF13855] Leucine rich repeat; [PF08263] Leucine rich repeat N-terminal domain; [GO:0005515] protein binding; [PF13504] Leucine rich repeat; [PF00560] Leucine Rich Repeat; [PTHR24420] LEUCINE-RICH REPEAT RECEPTOR-LIKE PROTEIN KINASE; [KOG0472] Leucine-rich repeat protein
Mapoly0009s0204	33	20	22	8	20.75	3.01914	5	1	2	3	2.75	0.349911	0.35959	-2.9156	2.89322	-3.15389	2.67958e-06	3.07626e-05	[PF03729] Short repeat of unknown function (DUF308)
Mapoly0077s0011	21	22	18	20	20.25	1.06896	1	4	6	3	3.5	0.125599	0.205567	-2.53249	3.11188	-2.7534	2.75101e-06	3.15451e-05
Mapoly0090s0025	24	58	34	26	35.5	2.04012	13	5	7	3	7	0.409886	0.242223	-2.34239	3.96455	-2.7099	2.75661e-06	3.15784e-05
Mapoly0011s0033	383	989	768	811	737.75	21.4033	13	237	114	35	99.75	3.49157	1.74532	-2.88674	8.17353	-3.09716	2.79601e-06	3.1966e-05	[PF03094] Mlo family; [K08472] mlo protein; [GO:0016021] integral to membrane; [PTHR31942] FAMILY NOT NAMED; [GO:0006952] defense response
Mapoly0021s0133	22	33	32	26	28.25	1.94113	4	5	6	7	5.5	0.268144	0.409083	-2.36074	3.70273	-2.58404	2.83129e-06	3.2331e-05
Mapoly0064s0019	4	10	4	12	7.5	1.09071	0	0	0	0	0	0	0	-18.7404	-15.2261	-19.238	2.87237e-06	3.27807e-05
Mapoly0008s0243	160	269	197	249	218.75	6.83415	6	68	15	31	30	1.11796	0.688085	-2.86625	6.45575	-2.98668	2.94911e-06	3.36366e-05
Mapoly0141s0026	109	240	934	113	349	6.72924	16	2	7	54	19.75	0.123136	0.576395	-4.1433	6.52456	-4.33636	3.12698e-06	3.5535e-05
Mapoly0046s0022	77	82	79	86	81	3.93958	20	17	32	29	24.5	0.763059	1.34105	-1.72514	5.51642	-1.968	3.1303e-06	3.5535e-05	[PTHR22931:SF1] ALPHA-GLUCAN WATER DIKINASE, CHLOROPLAST PRECURSOR; [PTHR22931] PHOSPHOENOLPYRUVATE DIKINASE-RELATED
Mapoly0034s0117	3	13	8	6	7.5	1.21088	0	0	0	0	0	0	0	-18.7404	-15.2261	-19.2431	3.16327e-06	3.58672e-05
Mapoly0137s0006	626	74	38	64	200.5	8.81432	1	18	0	1	5	0.480653	0.0275349	-5.32553	4.99001	-5.18215	3.17075e-06	3.59308e-05
Mapoly0093s0004	47	146	90	129	103	6.58602	34	20	34	23	27.75	1.38444	1.56428	-1.89208	5.77328	-2.22249	3.19634e-06	3.61995e-05
Mapoly0002s0126	18	24	19	29	22.5	1.82189	1	2	7	4	3.5	0.109069	0.383004	-2.68449	3.19057	-2.94956	3.22742e-06	3.64659e-05
Mapoly0012s0097	18	26	17	21	20.5	1.22569	9	1	2	2	3.5	0.223451	0.109148	-2.55019	3.04421	-2.94512	3.36491e-06	3.79748e-05
Mapoly0003s0255	29	17	27	15	22	1.20626	3	5	6	0	3.5	0.200344	0.126159	-2.65207	3.11641	-2.94887	3.37601e-06	3.80778e-05	[PF00188] Cysteine-rich secretory protein family; [PTHR10334] CYSTEINE-RICH SECRETORY PROTEIN-RELATED
Mapoly0071s0048	185	329	272	348	283.5	5.35695	27	114	41	11	48.25	1.2383	0.3953	-2.55475	6.94405	-2.77925	3.42225e-06	3.85543e-05
Mapoly0165s0022	44	33	30	28	33.75	1.00547	14	6	7	8	8.75	0.245374	0.211418	-1.94753	4.09989	-2.20209	3.9332e-06	4.40788e-05
Mapoly0047s0016	15	16	16	9	14	10.998	0	4	1	0	1.25	1.58985	0.298466	-3.48541	2.14742	-3.61025	3.93869e-06	4.41147e-05
Mapoly0064s0023	1698	1827	4299	1694	2379.5	39.453	696	381	963	1184	806	7.13254	16.1338	-1.56181	10.5004	-1.82772	4.19697e-06	4.67091e-05	[PTHR31636] FAMILY NOT NAMED; [PF03514] GRAS domain family
Mapoly0006s0063	45	139	68	136	97	1.87116	18	20	31	23	23	0.309976	0.45128	-2.07635	5.61547	-2.36013	4.27329e-06	4.7449e-05
Mapoly0007s0073	7	2	14	9	8	2.87198	0	0	0	0	0	0	0	-18.8335	-15.2261	-19.3373	4.34307e-06	4.81684e-05
Mapoly0096s0056	24	33	27	27	27.75	1.09932	1	9	3	4	4.25	0.192155	0.129351	-2.70695	3.5383	-2.84022	4.38311e-06	4.85583e-05
Mapoly0001s0193	9	7	16	24	14	1.59252	1	0	2	2	1.25	0.0395132	0.200575	-3.48541	2.12046	-3.79056	4.52938e-06	5.01194e-05
Mapoly0020s0132	42	21	16	8	21.75	2.08224	0	5	3	0	2	0.257515	0.116025	-3.44293	2.72656	-3.5435	4.62386e-06	5.1077e-05
Mapoly0068s0091	4	23	20	21	17	1.08895	3	0	0	2	1.25	0.0661189	0.0657985	-3.76552	2.25596	-4.11098	4.99382e-06	5.50376e-05
Mapoly0077s0032	12	113	149	14	72	7.55731	1	0	6	7	3.5	0.0360581	0.602935	-4.36256	4.08478	-4.63099	5.11894e-06	5.63521e-05
Mapoly0012s0045	128	67	74	88	89.25	1.12116	5	34	7	9	13.75	0.243304	0.0964838	-2.69842	5.20261	-2.78832	5.18701e-06	5.7004e-05	[PF13855] Leucine rich repeat; [GO:0005524] ATP binding; [KOG1187] Serine/threonine protein kinase; [PF00069] Protein kinase domain; [PF08263] Leucine rich repeat N-terminal domain; [GO:0005515] protein binding; [GO:0004672] protein kinase activity; [PF00560] Leucine Rich Repeat; [GO:0006468] protein phosphorylation; [PF12799] Leucine Rich repeats (2 copies); [PTHR24420] LEUCINE-RICH REPEAT RECEP…
Mapoly0041s0127	10	56	65	36	41.75	1.3345	7	8	6	3	6	0.202399	0.110781	-2.79874	4.04102	-3.13824	5.25449e-06	5.76797e-05	[KOG0286] G-protein beta subunit; [GO:0005515] protein binding; [PTHR22847] WD40 REPEAT PROTEIN; [PF00400] WD domain, G-beta repeat
Mapoly0143s0025	12.5216	34.1521	21.7146	21.5423	22.4826	1.18645	0	5.35155	2.05766	4.15088	2.89002	0.138922	0.155655	-2.95965	3.13777	-3.07681	5.33561e-06	5.8537e-05
Mapoly0128s0003	26	64	58	71	54.75	1.41175	6	13	12	13	11	0.216548	0.287117	-2.31535	4.70383	-2.55152	5.3568e-06	5.8736e-05	[PTHR31479] FAMILY NOT NAMED; [PF01764] Lipase (class 3); [GO:0006629] lipid metabolic process
Mapoly0064s0047	60	185	276	148	167.25	18.4781	30	22	37	54	35.75	2.30984	4.54477	-2.22599	6.35961	-2.49684	5.45247e-06	5.97111e-05
Mapoly0170s0025	9	4	3	10	6.5	1.13502	0	0	0	0	0	0	0	-18.534	-15.2261	-18.965	5.5442e-06	6.06185e-05
Mapoly0062s0105	11	19	20	22	18	3.10706	2	1	2	5	2.5	0.205485	0.578783	-2.84799	2.83944	-3.05065	5.59369e-06	6.10903e-05
Mapoly0023s0006	468	575	438	488	492.25	6.13501	36	194	24	13	66.75	1.37571	0.199995	-2.88255	7.58415	-3.02857	5.71141e-06	6.22351e-05
Mapoly0087s0059	85	163	148	153	137.25	5.11693	18	53	35	32	34.5	1.20518	1.10768	-1.99214	6.18502	-2.21095	5.93706e-06	6.45843e-05
Mapoly0052s0019	5	13	5	12	8.75	1.04014	0	0	2	0	0.5	0	0.0879085	-4.12924	1.00221	-4.61868	5.98709e-06	6.50919e-05
Mapoly0011s0017	63.1678	118.966	63.1819	110.032	88.8369	2.19933	15.5829	32.7262	9.42995	2.76801	15.1268	0.538832	0.12329	-2.55405	5.24781	-2.79739	6.06948e-06	6.59133e-05
Mapoly0032s0046	72	138	359	82	162.75	5.76723	27	17	29	45	29.5	0.618593	1.19027	-2.46387	6.20131	-2.74071	6.09766e-06	6.61076e-05	[PF12689] Acid Phosphatase; [GO:0016791] phosphatase activity; [PTHR17901] FAMILY NOT NAMED; [KOG4549] Magnesium-dependent phosphatase
Mapoly0142s0017	63	226	141	156	146.5	3.61131	24	43	46	35	37	0.724325	0.866603	-1.9853	6.26866	-2.24726	6.10781e-06	6.61805e-05
Mapoly0012s0010	198	458	571	325	388	12.6251	65	47	84	172	92	1.48204	3.91519	-2.07635	7.65754	-2.29211	6.25365e-06	6.76847e-05	[GO:0005524] ATP binding; [K01610] phosphoenolpyruvate carboxykinase (ATP) [EC:4.1.1.49]; [PTHR30031:SF0] PHOSPHOENOLPYRUVATE CARBOXYKINASE [ATP]; [GO:0004612] phosphoenolpyruvate carboxykinase (ATP) activity; [PTHR30031] PHOSPHOENOLPYRUVATE CARBOXYKINASE [ATP]; [PF01293] Phosphoenolpyruvate carboxykinase; [GO:0006094] gluconeogenesis; [4.1.1.49] Phosphoenolpyruvate carboxykinase (ATP).
Mapoly0124s0014	116	135	190	140	145.25	4.37561	47	50	42	53	48	1.24526	1.31378	-1.59743	6.44368	-1.83936	6.31885e-06	6.8199e-05	[GO:0019139] cytokinin dehydrogenase activity; [GO:0008762] UDP-N-acetylmuramate dehydrogenase activity; [GO:0050660] flavin adenine dinucleotide binding; [PTHR13878] GULONOLACTONE OXIDASE; [GO:0055114] oxidation-reduction process; [1.5.99.12] Cytokinin dehydrogenase.; [GO:0016491] oxidoreductase activity; [GO:0009690] cytokinin metabolic process; [K00279] cytokinin dehydrogenase [EC:1.5.99.12]; …
Mapoly0173s0005	89	127	117	143	119	4.3427	42	40	39	41	40.5	1.26387	1.31934	-1.55497	6.1678	-1.81353	6.36581e-06	6.8629e-05
Mapoly0007s0104	12	8	5	2	6.75	2.29236	0	0	0	0	0	0	0	-18.5884	-15.2261	-18.9607	6.40314e-06	6.89929e-05	[PF12617] Iron-Sulfur binding protein C terminal
Mapoly0072s0012	4	4	14	7	7.25	1.29733	0	0	0	0	0	0	0	-18.6915	-15.2261	-19.2198	6.72529e-06	7.21015e-05
Mapoly0077s0022	138	172	159	185	163.5	2.93197	79	49	76	16	55	0.94211	0.661282	-1.57179	6.55679	-1.93334	6.94475e-06	7.43717e-05	[GO:0016020] membrane; [GO:0008375] acetylglucosaminyltransferase activity; [PF02485] Core-2/I-Branching enzyme; [PTHR31042] FAMILY NOT NAMED
Mapoly0019s0123	4	25	4	14	11.75	1.37619	0	0	1	0	0.25	0	0.0432431	-5.55449	0.71615	-6.04655	7.01427e-06	7.49913e-05
Mapoly0146s0020	11	3	10	8	8	2.08299	0	0	0	1	0.25	0	0.141849	-4.9999	0.666874	-4.94222	7.25914e-06	7.73948e-05
Mapoly0520s0001	29	54	53	46	45.5	3.03777	18	3	8	12	10.25	0.522058	0.618561	-2.15024	4.45762	-2.4776	7.6454e-06	8.12882e-05
Mapoly0058s0119	5	19	20	12	14	1.22546	0	2	2	0	1	0.0845346	0.0634794	-3.80733	1.96345	-4.11473	8.04828e-06	8.52428e-05	[GO:0055114] oxidation-reduction process; [PF00141] Peroxidase; [GO:0020037] heme binding; [PTHR31235] FAMILY NOT NAMED; [GO:0006979] response to oxidative stress; [GO:0004601] peroxidase activity
Mapoly0006s0203	12	23	7	10	13	1.18178	1	1	1	2	1.25	0.0794211	0.13383	-3.37849	2.06999	-3.53496	8.23618e-06	8.71851e-05
Mapoly0009s0138	24	47	37	45	38.25	2.59035	13	3	15	6	9.25	0.410397	0.58865	-2.04793	4.22634	-2.43614	8.56054e-06	9.04201e-05
Mapoly0072s0040	7	14	24	13	14.5	1.66515	0	3	1	1	1.25	0.166301	0.101069	-3.53603	2.21839	-3.70724	8.68174e-06	9.14499e-05
Mapoly0019s0026	17	21	21	18	19.25	2.6477	7	3	1	4	3.75	0.55051	0.345602	-2.35989	3.11831	-2.62882	8.76077e-06	9.2232e-05
Mapoly0019s0109	25	50	48	79	50.5	1.85952	7	14	11	10	10.5	0.339124	0.338319	-2.26589	4.60526	-2.5206	8.79231e-06	9.25135e-05	[KOG2615] Permease of the major facilitator superfamily; [PTHR24003] MAJOR FACILITATOR SUPERFAMILY DOMAIN-CONTAINING PROTEIN-RELATED; [GO:0016021] integral to membrane; [GO:0055085] transmembrane transport; [PF07690] Major Facilitator Superfamily
Mapoly0047s0009	1	28	19	14	15.5	1.6161	1	1	1	0	0.75	0.0856497	0.0374293	-4.3692	1.79201	-4.7802	9.04341e-06	9.49484e-05
Mapoly0066s0054	16	40	36	45	34.25	3.22699	7	7	4	8	6.5	0.549525	0.529136	-2.39759	3.98048	-2.6462	9.76155e-06	0.000102099
Mapoly0024s0077	40	81	77	71	67.25	1.65273	10	21	21	17	17.25	0.339105	0.409073	-1.96294	5.1596	-2.20824	9.79001e-06	0.000102341
Mapoly0173s0021	36	55	75	34	50	2.771	24	9	10	8	12.75	0.716178	0.43908	-1.97143	4.66492	-2.32813	9.80268e-06	0.000102418
Mapoly0002s0270	55.7834	132.628	152.484	147.322	122.054	22.9172	22	38	49.9778	11	30.2445	4.8844	4.47782	-2.01278	5.96412	-2.35511	9.85263e-06	0.000102885
Mapoly0006s0007	15.8306	104.248	67.0382	68.9377	64.0136	1.82625	12.6855	13.7732	14.1427	9.2983	12.4749	0.314974	0.283387	-2.35935	4.87678	-2.67474	9.86942e-06	0.000103004
Mapoly0005s0015	137	167	236	293	208.25	7.54748	8	77	12	18	28.75	1.46153	0.500079	-2.85668	6.39452	-3.011	9.91357e-06	0.000103409	[PF00544] Pectate lyase; [PTHR31683] FAMILY NOT NAMED
Mapoly0019s0019	55	76	58	49	59.5	1.36266	11	21	24	12	17	0.332463	0.355332	-1.80735	5.02472	-2.05052	9.9528e-06	0.000103762	[PTHR32133] FAMILY NOT NAMED; [GO:0005515] protein binding; [PF00646] F-box domain
Mapoly0135s0044	93	245	228	217	195.75	16.5156	39	23	60	78	50	2.09171	5.27669	-1.96901	6.70162	-2.22857	1.00558e-05	0.000104722	[GO:0055114] oxidation-reduction process; [PTHR11972] NADPH OXIDASE; [GO:0016491] oxidoreductase activity; [PTHR11972:SF5] RESPIRATORY BURST OXIDASE; [PF08030] Ferric reductase NAD binding domain
Mapoly0057s0027	1277	543	1598	510	982	15.0573	251	481	234	338	326	5.14122	4.18382	-1.59085	9.20321	-1.7586	1.02852e-05	0.000107019	[GO:0016020] membrane; [PF03254] Xyloglucan fucosyltransferase; [GO:0042546] cell wall biogenesis; [GO:0008107] galactoside 2-alpha-L-fucosyltransferase activity; [PTHR31889] FAMILY NOT NAMED
Mapoly0128s0025	21	34	26	32	28.25	1.13541	3	7	11	1	5.5	0.18213	0.185661	-2.36074	3.65169	-2.68829	1.03095e-05	0.000107191
Mapoly0185s0004	41	86	65	79	67.75	5.79297	36	6	14	13	17.25	1.33714	1.02625	-1.97362	5.09172	-2.35686	1.0403e-05	0.000108047	[PF00477] Small hydrophilic plant seed protein
Mapoly0072s0096	92	161	148	136	134.25	6.53444	83	35	44	23	46.25	2.26931	1.38389	-1.5374	6.30021	-1.90305	1.06412e-05	0.000110342	[PTHR11079] CYTOSINE DEAMINASE; [GO:0016787] hydrolase activity; [PF00383] Cytidine and deoxycytidylate deaminase zinc-binding region; [GO:0008270] zinc ion binding; [KOG1018] Cytosine deaminase FCY1 and related enzymes
Mapoly0085s0048	3	8	8	5	6	8.40971	0	0	0	0	0	0	0	-18.4185	-15.2261	-18.9248	1.0681e-05	0.000110695
Mapoly0590s0002	9	7	3	14	8.25	2.70932	0	1	0	0	0.25	0.1655	0	-5.0443	0.641497	-5.09938	1.07601e-05	0.000111381	[PF00188] Cysteine-rich secretory protein family; [PTHR10334] CYSTEINE-RICH SECRETORY PROTEIN-RELATED
Mapoly0132s0044	8	32	33	34	26.75	1.85082	4	0	2	6	3	0.0953062	0.263214	-3.1565	3.24776	-3.43272	1.08518e-05	0.000112225
Mapoly0065s0093	211	221	169	183	196	3.00641	41	107	46	38	58	1.06124	0.590826	-1.75673	6.7898	-1.93614	1.09946e-05	0.000113519	[KOG1187] Serine/threonine protein kinase; [PF07714] Protein tyrosine kinase; [GO:0004672] protein kinase activity; [GO:0006468] protein phosphorylation; [PTHR24420] LEUCINE-RICH REPEAT RECEPTOR-LIKE PROTEIN KINASE
Mapoly0065s0045	2	5	10	10	6.75	126.781	0	0	0	0	0	0	0	-18.5884	-15.2261	-19.1334	1.17933e-05	0.00012144	[GO:0016021] integral to membrane; [PF01679] Proteolipid membrane potential modulator; [PTHR21659] HYDROPHOBIC PROTEIN RCI2 (LOW TEMPERATURE AND SALT RESPONSIVE PROTEIN LTI6)-RELATED; [KOG1773] Stress responsive protein
Mapoly0025s0048	65	112	149	33	89.75	4.52045	15	2	8	26	12.75	0.317953	0.843394	-2.81541	5.15514	-3.02809	1.20183e-05	0.000123559	[PF01255] Putative undecaprenyl diphosphate synthase; [KOG1602] Cis-prenyltransferase; [PF09995] Uncharacterized protein conserved in bacteria (DUF2236); [GO:0016765] transferase activity, transferring alkyl or aryl (other than methyl) groups; [PTHR10291] DEHYDRODOLICHYL DIPHOSPHATE SYNTHASE
Mapoly0045s0023	7	9	14	13	10.75	1.02616	1	2	0	1	1	0.126462	0.0498852	-3.42624	1.82056	-3.60864	1.21072e-05	0.000124407
Mapoly0107s0006	376	835	479	1052	685.5	29.7085	41	248	230	173	173	5.87424	7.58431	-1.98638	8.51179	-2.20545	1.24882e-05	0.000127981	[PTHR31867] FAMILY NOT NAMED; [PF03330] Rare lipoprotein A (RlpA)-like double-psi beta-barrel; [PF01357] Pollen allergen
Mapoly0122s0008	35	57	33	51	44	1.58883	14	16	8	8	11.5	0.468609	0.262313	-1.93587	4.53336	-2.18485	1.27001e-05	0.000129945
Mapoly0014s0049	7	36	30	27	25	1.96843	4	3	6	3	4	0.22261	0.292692	-2.64385	3.36232	-2.9974	1.30785e-05	0.000133533
Mapoly0023s0124	14	45	23	39	30.25	116.797	4	9	4	3	5	22.3937	11.7323	-2.59693	3.69324	-2.84026	1.31437e-05	0.000134129
Mapoly0011s0186	80	222	174	211	171.75	3.44055	55	62	72	29	54.5	0.988726	0.829515	-1.65598	6.63398	-1.98382	1.31877e-05	0.000134506
Mapoly0012s0099	16	59	49	38	40.5	2.66354	13	9	6	6	8.5	0.443994	0.328318	-2.25238	4.25669	-2.57684	1.34196e-05	0.000136727
Mapoly0001s0339	84	132	114	46	94	1.43111	16	8	26	35	21.25	0.149108	0.436415	-2.1452	5.53345	-2.35449	1.38458e-05	0.000140921
Mapoly0083s0096	16	16	18	19	17.25	1.30096	5	2	5	3	3.75	0.210145	0.261999	-2.20163	3.01211	-2.52485	1.41321e-05	0.000143305
Mapoly0007s0287	358	213	349	227	286.75	38.5773	41	124	86	99	87.5	10.4818	11.6625	-1.71244	7.37009	-1.8663	1.42141e-05	0.000144061	[PF14009] Domain of unknown function (DUF4228)
Mapoly0019s0100	8	17	16	14	13.75	1.5894	1	1	3	3	2	0.097223	0.309472	-2.78135	2.45901	-3.03018	1.47498e-05	0.000148786
Mapoly0083s0049	94	135	212	105	136.5	4.94634	55	36	40	48	44.75	1.34102	1.44755	-1.60894	6.33829	-1.89294	1.48125e-05	0.000149263
Mapoly0108s0029	23	43	33	43	35.5	1.78193	14	4	9	9	9	0.34694	0.404994	-1.97982	4.18099	-2.30795	1.52743e-05	0.000153355	[PTHR12480] PHOSPHATIDYLSERINE RECEPTOR; [PTHR12480:SF6] JMJC DOMAIN-CONTAINING PROTEIN 1; [KOG2131] Uncharacterized conserved protein, contains JmjC domain; [PF13621] Cupin-like domain
Mapoly0096s0063	115	75	92	95	94.25	9.12831	0	26	2	11	9.75	1.27805	0.653635	-3.27302	5.04366	-3.30795	1.5573e-05	0.00015611
Mapoly0045s0034	11	35	35	45	31.5	1.10477	5	6	8	5	6	0.161559	0.191494	-2.39231	3.84199	-2.70932	1.57283e-05	0.000157586
Mapoly0075s0009	16	35	38	27	29	2.07765	5	4	9	7	6.25	0.26541	0.49869	-2.21412	3.80195	-2.50737	1.57928e-05	0.000157986
Mapoly0185s0027	30	15	16	19	20	2.21003	2	5	4	5	4	0.368282	0.478625	-2.32192	3.20793	-2.44754	1.58481e-05	0.000158456	[GO:0016020] membrane; [PTHR11654] OLIGOPEPTIDE TRANSPORTER-RELATED; [PF00854] POT family; [GO:0006810] transport; [GO:0005215] transporter activity
Mapoly0068s0053	24	28	20	32	26	1.82111	3	7	6	7	5.75	0.320693	0.420759	-2.17687	3.68038	-2.36013	1.59605e-05	0.000159415
Mapoly0047s0034	157	148	161	117	145.75	2.36548	37	48	38	67	47.5	0.610895	0.822235	-1.6175	6.44141	-1.7884	1.66304e-05	0.000165506	[PTHR31636] FAMILY NOT NAMED; [PF03514] GRAS domain family
Mapoly0660s0001	4	16	38	9	16.75	1.06759	0	1	2	1	1	0.030212	0.0777706	-4.06607	2.12247	-4.3721	1.73998e-05	0.000172275
Mapoly0010s0021	20	42	48	41	37.75	1.4317	1	13	6	3	5.75	0.252975	0.142407	-2.71484	3.9793	-2.92301	1.76618e-05	0.000174599
Mapoly0161s0030	2	7	5	13	6.75	1.13947	0	0	0	0	0	0	0	-18.5884	-15.2261	-19.1198	1.85362e-05	0.000182681
Mapoly0009s0043	10.844	33.7895	21.5394	20.739	21.728	1.30353	5.7152	1.50627	6.39332	2.77915	4.09849	0.16506	0.228864	-2.40639	3.23733	-2.78908	1.86346e-05	0.000183558
Mapoly0183s0010	1	13	10	6	7.5	1.17193	0	0	0	0	0	0	0	-18.7404	-15.2261	-19.2715	1.89323e-05	0.000186395	[GO:0003677] DNA binding; [PF02362] B3 DNA binding domain
Mapoly0129s0022	193	192	110	247	185.5	6.53244	23	63	56	67	52.25	1.41158	2.02176	-1.82792	6.68768	-1.99097	1.89971e-05	0.000186937
Mapoly0184s0022	35	40	27	32	33.5	1.44676	5	10	10	10	8.75	0.296951	0.398338	-1.9368	4.14954	-2.12114	1.96663e-05	0.000192834
Mapoly0003s0182	34	36	83	27	45	2.54118	5	8	9	13	8.75	0.3208	0.572824	-2.36257	4.39729	-2.57487	2.00532e-05	0.000196129	[PTHR31549:SF0] SUBFAMILY NOT NAMED; [PTHR31549] FAMILY NOT NAMED; [PF03140] Plant protein of unknown function
Mapoly1547s0001	3	3	8	12	6.5	1.18559	0	0	0	0	0	0	0	-18.534	-15.2261	-19.0692	2.08e-05	0.000203124
Mapoly0213s0008	5.6751	42.9532	44.3854	33.8799	31.7234	1.39582	3.21425	0	6.9508	4.50395	3.66725	0.0484532	0.21088	-3.11277	3.47302	-3.4909	2.0935e-05	0.000204338
Mapoly0036s0011	34	41	52	46	43.25	1.24105	3	17	8	1	7.25	0.271177	0.100227	-2.57664	4.21234	-2.80648	2.11187e-05	0.000205819
Mapoly0064s0051	61	153	124	142	120	2.28099	28	53	30	25	34	0.677476	0.457145	-1.81943	6.06857	-2.07288	2.16558e-05	0.000210947
Mapoly0092s0074	7	10	20	5	10.5	15.3425	1	0	2	1	1	0.512882	1.83787	-3.3923	1.70492	-3.77019	2.27197e-05	0.00022042
Mapoly0061s0109	8	15	16	14	13.25	1.04131	0	3	2	2	1.75	0.1153	0.140146	-2.92055	2.37528	-3.09318	2.36635e-05	0.00022923
Mapoly0063s0070	78	107	92	114	97.75	3.33273	12	40	34	25	27.75	0.82166	0.884509	-1.81661	5.76948	-2.03013	2.42584e-05	0.000234404	[PF13877] Potential Monad-binding region of RPAP3
Mapoly0052s0006	9	13	8	15	11.25	1.10889	1	1	0	3	1.25	0.0841183	0.157478	-3.16991	2.0298	-3.26386	2.54044e-05	0.000244865
Mapoly0075s0075	83	70	73	56	70.5	21.1849	23	32	15	20	22.5	7.41017	4.9954	-1.6477	5.35867	-1.83777	2.55141e-05	0.000245677
Mapoly0035s0071	21	67	42	40	42.5	1.33426	14	11	11	8	11	0.324147	0.259212	-1.94996	4.47037	-2.25849	2.57874e-05	0.000248185
Mapoly0074s0084	20	13	14	26	18.25	1.0339	4	3	4	4	3.75	0.167093	0.207478	-2.28293	3.07963	-2.52696	2.58551e-05	0.000248711
Mapoly0012s0008	37	109	142	78	91.5	2.61761	40	6	11	22	19.75	0.479522	0.439719	-2.21192	5.44224	-2.57589	2.59616e-05	0.000249612	[PTHR12305] PHOSPHATASE WITH HOMOLOGY TO TENSIN
Mapoly0171s0016	6	16	24	15	15.25	1.55951	0	2	3	2	1.75	0.0983113	0.216157	-3.12337	2.46303	-3.3752	2.65007e-05	0.000254289
Mapoly0021s0073	88	137	91	110	106.5	2.72973	14	28	22	46	27.5	0.486695	0.842085	-1.95335	5.84708	-2.10362	2.67565e-05	0.000256487
Mapoly0038s0071	21	25	20	26	23	1.48763	3	4	9	6	5.5	0.198961	0.426435	-2.06413	3.52879	-2.31241	2.68033e-05	0.000256685
Mapoly0073s0022	13	22	18	15	17	3.14762	1	1	2	6	2.5	0.15801	0.729724	-2.76553	2.81345	-2.89139	2.79357e-05	0.000266995
Mapoly0021s0038	4	51	39	48	35.5	2.42907	1	7	5	1	3.5	0.25132	0.157172	-3.34239	3.56432	-3.63708	2.79765e-05	0.000267252
Mapoly0039s0017	17	23	43	49	33	3.36153	7	4	6	10	6.75	0.442578	0.746512	-2.2895	3.97909	-2.56335	2.81147e-05	0.000268307
Mapoly0008s0216	152.801	200.901	399.44	230.549	245.923	3.06689	155.926	59.5342	56.0676	69.9436	85.3678	1.06649	0.721063	-1.52644	7.20827	-1.87635	2.88652e-05	0.00027506	[PF13855] Leucine rich repeat; [GO:0005524] ATP binding; [KOG1187] Serine/threonine protein kinase; [PF08263] Leucine rich repeat N-terminal domain; [PF00069] Protein kinase domain; [GO:0005515] protein binding; [GO:0004672] protein kinase activity; [PF00560] Leucine Rich Repeat; [GO:0006468] protein phosphorylation; [PF12799] Leucine Rich repeats (2 copies); [PTHR24420] LEUCINE-RICH REPEAT RECEP…
Mapoly0179s0021	78	121	101	139	109.75	3.98989	9	50	11	15	21.25	0.984711	0.436053	-2.36869	5.69548	-2.52928	2.93238e-05	0.00027888	[PTHR24089] FAMILY NOT NAMED; [PF00153] Mitochondrial carrier protein; [KOG0749] Mitochondrial ADP/ATP carrier proteins; [K05863] solute carrier family 25 (mitochondrial carrier; adenine nucleotide translocator)
Mapoly0004s0011	47	114	66	56	70.75	1.42693	26	28	14	13	20.25	0.456271	0.239029	-1.80481	5.28228	-2.06769	2.94168e-05	0.000279627
Mapoly0093s0089	15	34	17	28	23.5	1.1313	9	5	3	3	5	0.272758	0.130125	-2.23266	3.45534	-2.55385	2.97053e-05	0.00028223
Mapoly0039s0068	55	68	70	51	61	1.02165	20	20	22	22	21	0.287463	0.33551	-1.53842	5.20514	-1.77857	3.00088e-05	0.000284692	[PF00010] Helix-loop-helix DNA-binding domain; [GO:0046983] protein dimerization activity; [PTHR12565] STEROL REGULATORY ELEMENT-BINDING PROTEIN
Mapoly0041s0134	17	50	36	45	37	1.76269	7	9	12	8	9	0.32526	0.407828	-2.03953	4.24507	-2.32945	3.01223e-05	0.000285629	[PF01426] BAH domain; [PF00628] PHD-finger; [GO:0005515] protein binding; [GO:0003682] chromatin binding; [PTHR12505] PHD FINGER TRANSCRIPTION FACTOR
Mapoly0001s0209	23	34	38	25	30	1.74334	6	10	10	6	8	0.411385	0.400835	-1.90689	4.00112	-2.16711	3.05974e-05	0.000289849
Mapoly0159s0031	0	16	17	6	9.75	1.25406	0	0	0	0	0	0	0	-19.1189	-15.2261	-19.6685	3.13488e-05	0.000296529
Mapoly0068s0072	31	42	28	26	31.75	2.65842	2	7	8	11	7	0.356597	0.752477	-2.18133	3.97346	-2.32586	3.17828e-05	0.000300341	[PTHR21540:SF0] SUBFAMILY NOT NAMED; [PTHR21540] RING FINGER AND SWIM DOMAIN-CONTAINING PROTEIN 2
Mapoly0010s0122	7.2402	43.4751	22.6516	32.2192	26.3965	1.17878	7.27515	3.75985	2.50056	4.06485	4.4001	0.193705	0.134598	-2.58473	3.47809	-2.90704	3.24533e-05	0.000305927
Mapoly0091s0031	123	110	116	89	109.5	4.165	64	15	34	3	29	1.1743	0.553662	-1.91681	5.75228	-2.33195	3.27231e-05	0.000308019	[PTHR32133] FAMILY NOT NAMED
Mapoly0541s0001	111	327	172	336	236.5	5.24558	15	103	21	17	39	1.23043	0.367682	-2.60029	6.69193	-2.78105	3.53777e-05	0.000330907
Mapoly0047s0103	73	160	109	117	114.75	4.58907	38	36	42	45	40.25	1.24877	1.5742	-1.51143	6.14065	-1.76546	3.59277e-05	0.000335076	[PF02631] RecX family; [GO:0006282] regulation of DNA repair
Mapoly0133s0038	18	54	28	57	39.25	4.34453	5	7	12	10	8.5	0.571128	1.06411	-2.20716	4.25647	-2.4722	3.80742e-05	0.000352708
Mapoly0112s0025	36	111	78	83	77	4.70403	1	23	4	12	10	0.706977	0.473081	-2.94486	4.9325	-3.06279	3.92281e-05	0.000362526	[PF00190] Cupin; [GO:0045735] nutrient reservoir activity; [PTHR31238] FAMILY NOT NAMED
Mapoly0033s0087	138	58	150	59	101.25	1.09172	15	38	11	26	22.5	0.288746	0.205657	-2.16992	5.64972	-2.29356	3.97367e-05	0.000366699	[PTHR10270] SOX TRANSCRIPTION FACTOR; [PF14874] Flagellar-associated PapD-like
Mapoly0073s0036	17	39	61	58	43.75	2.75712	3	15	8	5	7.75	0.517849	0.343188	-2.49701	4.3025	-2.74504	4.04238e-05	0.00037215
Mapoly0596s0001	40	327	228	324	229.75	12.0084	3	7	81	4	23.75	0.228652	1.62626	-3.27406	6.19463	-3.75208	4.1389e-05	0.000380309	[GO:0005506] iron ion binding; [KOG0156] Cytochrome P450 CYP2 subfamily; [GO:0055114] oxidation-reduction process; [GO:0016705] oxidoreductase activity, acting on paired donors, with incorporation or reduction of molecular oxygen; [GO:0020037] heme binding; [PTHR24298] FAMILY NOT NAMED; [PF00067] Cytochrome P450
Mapoly0060s0097	15	15	17	30	19.25	1.84609	5	2	6	4	4.25	0.263582	0.414565	-2.17932	3.19834	-2.50603	4.17138e-05	0.000382929	[PF00026] Eukaryotic aspartyl protease; [PTHR13683] ASPARTYL PROTEASES; [PF14541] Xylanase inhibitor C-terminal; [GO:0004190] aspartic-type endopeptidase activity; [GO:0006508] proteolysis
Mapoly0119s0001	0	25	19	9	13.25	1.74805	0	0	1	0	0.25	0	0.0472156	-5.72782	0.827041	-6.26834	4.17941e-05	0.000383484
Mapoly0010s0039	17	47	21	27	28	1.35476	10	7	2	0	4.75	0.340157	0.0360183	-2.55942	3.52425	-2.91426	4.23765e-05	0.000387905	[PTHR31669] FAMILY NOT NAMED; [PF10551] MULE transposase domain
Mapoly0007s0281	100	153	258	107	154.5	2.27461	100	25	50	22	49.25	0.696536	0.43976	-1.64941	6.43509	-2.0666	4.27395e-05	0.000391041	[PTHR31549] FAMILY NOT NAMED; [PF03140] Plant protein of unknown function; [PF03997] VPS28 protein
Mapoly0067s0056	151	218	396	143	227	8.76563	78	33	86	94	72.75	1.65528	2.94076	-1.64167	7.05602	-1.93409	4.36559e-05	0.000397959
Mapoly0102s0048	49	43	47	40	44.75	1.92861	0	14	9	12	8.75	0.304561	0.426953	-2.35453	4.39948	-2.46408	4.36948e-05	0.000397959
Mapoly0170s0024	24	56	63	44	46.75	2.15354	15	12	12	14	13.25	0.510438	0.538412	-1.81897	4.69711	-2.10361	4.63493e-05	0.000419705
Mapoly0005s0184	9	4	8	4	6.25	2.78778	0	0	1	0	0.25	0	0.172048	-4.64376	0.229898	-5.07405	4.63728e-05	0.000419705	[GO:0003677] DNA binding; [GO:0000786] nucleosome; [PTHR11426] HISTONE H3; [PF00125] Core histone H2A/H2B/H3/H4
Mapoly0006s0128	19	72	35	58	46	3.88585	6	17	4	1	7	0.877788	0.167896	-2.7162	4.24067	-2.96019	4.64925e-05	0.000420591
Mapoly0036s0051	191	510	524	636	465.25	51.72	20	206	68	78	93	11.811	7.21969	-2.3227	7.82126	-2.50886	4.68854e-05	0.000423947	[PTHR31718] FAMILY NOT NAMED; [PF06232] Embryo-specific protein 3, (ATS3)
Mapoly0008s0094	25	26	35	21	26.75	1.33559	8	7	9	7	7.75	0.317467	0.355265	-1.78727	3.88011	-2.05424	4.77916e-05	0.000431332
Mapoly0139s0016	20	56	26	45	36.75	1.09501	11	12	8	6	9.25	0.291609	0.182294	-1.99022	4.24819	-2.27261	4.83401e-05	0.000435468	[PTHR14871:SF1] SUBFAMILY NOT NAMED; [GO:0005515] protein binding; [PTHR14871] FAMILY NOT NAMED; [PF00612] IQ calmodulin-binding motif
Mapoly0091s0064	72.6232	144.898	81.6225	124.862	106.001	1.61374	36.4409	49.1637	38.5287	13.2063	34.3349	0.568736	0.327946	-1.62634	5.94423	-1.91868	5.00782e-05	0.000450073	[PTHR18877] KINESIN-RELATED; [GO:0000278] mitotic cell cycle; [KOG0978] E3 ubiquitin ligase involved in syntaxin degradation; [GO:0005515] protein binding; [PF00560] Leucine Rich Repeat; [PF12799] Leucine Rich repeats (2 copies); [GO:0051301] cell division
Mapoly0016s0122	0	9	14	8	7.75	6.77364	0	0	0	0	0	0	0	-18.7877	-15.2261	-19.3515	5.282e-05	0.000473832
Mapoly0006s0020	75	61	67	51	63.5	2.20147	12	30	8	16	16.5	0.680114	0.407931	-1.94429	5.08575	-2.08336	5.33745e-05	0.000478362
Mapoly0044s0062	80	75	93	80	82	1.49187	61	10	21	13	26.25	0.489393	0.270155	-1.64331	5.50093	-2.03742	5.3809e-05	0.000481856	[GO:0016020] membrane; [PF00520] Ion transport protein; [GO:0055085] transmembrane transport; [PTHR10217] VOLTAGE AND LIGAND GATED POTASSIUM CHANNEL; [GO:0006811] ion transport; [PF00027] Cyclic nucleotide-binding domain; [GO:0005216] ion channel activity; [KOG0498] K+-channel ERG and related proteins, contain PAS/PAC sensor domain
Mapoly0002s0157	210	138	122	122	148	3.40608	66	65	15	12	39.5	1.33717	0.287053	-1.90567	6.25538	-2.13382	5.38143e-05	0.000481856
Mapoly0070s0020	6	12	26	12	14	1.11356	0	1	2	3	1.5	0.038145	0.179998	-3.22238	2.3222	-3.41818	5.46028e-05	0.000488689
Mapoly0069s0016	39	55	82	35	52.75	1.70267	20	14	11	17	15.5	0.450915	0.421068	-1.7669	4.89024	-2.03225	5.49774e-05	0.000491813
Mapoly0111s0058	39	46	69	47	50.25	1.41188	31	8	16	5	15	0.418853	0.24045	-1.74416	4.75393	-2.16249	5.53045e-05	0.000494051	[PTHR14255] ATP-DEPENDENT PROTEASE (CEREBLON); [PTHR14255:SF3] gb def: Hypothetical protein M18.6; [GO:0016021] integral to membrane; [PF01925] Sulfite exporter TauE/SafE
Mapoly0010s0202	32	26	24	31	28.25	6.32864	13	3	13	5	8.5	1.39832	1.71394	-1.73271	3.92131	-2.08496	5.57369e-05	0.000497454
Mapoly0137s0018	3	13	15	39	17.5	2.85074	0	1	1	3	1.25	0.0766966	0.304321	-3.80734	2.39193	-3.96647	5.76084e-05	0.000512596
Mapoly0001s0050	16	48	31	37	33	2.16695	3	10	7	8	7	0.390076	0.443986	-2.23704	4.01751	-2.44274	5.76196e-05	0.000512596	[PTHR32133] FAMILY NOT NAMED; [GO:0005515] protein binding; [PF00646] F-box domain
Mapoly0028s0120	9	8	16	14	11.75	1.21679	1	0	5	0	1.5	0.0364177	0.190345	-2.96961	2.00634	-3.48073	5.98988e-05	0.000531158
Mapoly0072s0025	65	35	113	23	59	2.77236	18	7	8	18	12.75	0.4682	0.594553	-2.21022	4.82159	-2.45075	6.02337e-05	0.000533882
Mapoly0030s0091	50	123	83	86	85.5	2.09028	40	9	45	12	26.5	0.453864	0.561218	-1.68993	5.55097	-2.10389	6.05231e-05	0.000536201
Mapoly0015s0192	114	93	112	28	86.75	1.21623	44	17	31	18	27.5	0.350342	0.3069	-1.65743	5.58529	-1.95283	6.24e-05	0.000551815	[PF07993] Male sterility protein; [GO:0080019] fatty-acyl-CoA reductase (alcohol-forming) activity; [PF03015] Male sterility protein; [PTHR11011] MALE STERILITY PROTEIN 2-RELATED
Mapoly0005s0287	52	198	115	206	142.75	4.14105	11	57	6	13	21.75	0.911202	0.25897	-2.7144	5.91988	-2.89031	6.27835e-05	0.000554952	[GO:0003723] RNA binding; [PF14608] Zinc finger C-x8-C-x5-C-x3-H type; [PF00642] Zinc finger C-x8-C-x5-C-x3-H type (and similar); [PTHR10288:SF5] ZINC FINGER CCCH DOMAIN-CONTAINING PROTEIN; [PTHR10288] KH DOMAIN CONTAINING RNA BINDING PROTEIN; [PF00013] KH domain; [GO:0046872] metal ion binding
Mapoly0090s0003	14	14	17	28	18.25	3.35766	5	6	2	1	3.5	0.866338	0.232501	-2.38246	3.03831	-2.676	6.42313e-05	0.000566193
Mapoly0006s0211	3	6	6	3	4.5	1.7538	0	0	0	0	0	0	0	-18.0034	-15.2261	-18.493	6.50232e-05	0.000572388
Mapoly0026s0040	4	4	6	4	4.5	4.75383	0	0	0	0	0	0	0	-18.0034	-15.2261	-18.4837	6.64736e-05	0.000584089
Mapoly0039s0042	29	14	20	9	18	1.71582	9	3	2	1	3.75	0.471123	0.128127	-2.26303	2.97787	-2.58253	6.7911e-05	0.000595634
Mapoly0110s0025	7441	3623	4126	3076	4566.5	260.547	352	1806	1275	2172	1401.25	61.4717	98.1252	-1.70437	11.3661	-1.77197	6.90764e-05	0.000605581	[PTHR24413] FAMILY NOT NAMED; [PF00651] BTB/POZ domain; [GO:0005515] protein binding
Mapoly0004s0004	4	19	20	21	16	1.14655	0	2	5	0	1.75	0.0665848	0.140065	-3.19263	2.42688	-3.60197	6.94449e-05	0.000608258
Mapoly0135s0026	17	52	45	32	36.5	1.17655	14	1	14	4	8.25	0.173741	0.232591	-2.14543	4.09104	-2.59614	6.94769e-05	0.000608262
Mapoly0072s0013	21	15	88	48	43	3.26368	7	8	2	10	6.75	0.470737	0.441704	-2.67137	4.20698	-2.90683	7.27019e-05	0.000632477	[PTHR10992:SF56] HYDROLASE, ALPHA/BETA FOLD FAMILY PROTEIN; [PTHR10992] ALPHA/BETA HYDROLASE FOLD-CONTAINING PROTEIN; [PF12697] Alpha/beta hydrolase family
Mapoly0104s0011	22	56	20	41	34.75	3.68301	0	2	11	9	5.5	0.105136	0.941544	-2.65951	3.85298	-2.87632	7.32693e-05	0.000636552
Mapoly0214s0012	120.39	177.127	91.8355	175.021	141.093	3.87813	32.5204	68	47	46	48.3801	1.25496	1.16236	-1.54416	6.42853	-1.74582	7.38986e-05	0.000641153	[PF00657] GDSL-like Lipase/Acylhydrolase; [PTHR22835] ZINC FINGER FYVE DOMAIN CONTAINING PROTEIN; [GO:0016788] hydrolase activity, acting on ester bonds; [GO:0006629] lipid metabolic process
Mapoly0124s0006	61.4957	27.0472	36.211	30.4765	38.8076	5.72067	6.95869	11.5387	10.2809	14.12	10.7246	1.26837	1.75337	-1.85542	4.38914	-1.98496	7.41807e-05	0.000643022
Mapoly0371s0001	445	68	109	68	172.5	10.5014	47	30	39	48	41	2.16741	2.74508	-2.0729	6.35154	-2.15846	7.42283e-05	0.000643145	[GO:0016020] membrane; [PF00504] Chlorophyll A-B binding protein; [K08912] light-harvesting complex II chlorophyll a/b binding protein 1; [PTHR21649] CHLOROPHYLL A/B BINDING PROTEIN; [GO:0009765] photosynthesis, light harvesting
Mapoly0032s0149	57	98	91	65	77.75	2.23148	3	12	9	32	14	0.201113	0.583546	-2.47341	5.17029	-2.57437	7.53906e-05	0.000652336
Mapoly0034s0009	38	36	42	57	43.25	4.74213	2	7	8	18	8.75	0.458396	1.37512	-2.30534	4.39057	-2.43497	7.67511e-05	0.000663216
Mapoly0068s0070	7	15	14	11	11.75	12.8734	0	2	3	2	1.75	1.07451	2.36252	-2.74722	2.26017	-2.96947	7.69531e-05	0.000664664
Mapoly0004s0233	5332	2962	3667	3625	3896.5	154.66	116	1068	241	1536	740.25	23.6235	36.1841	-2.39609	10.8439	-2.41701	7.82584e-05	0.000674428	[GO:0016020] membrane; [PTHR19139] AQUAPORIN TRANSPORTER; [GO:0006810] transport; [KOG0223] Aquaporin (major intrinsic protein family); [GO:0005215] transporter activity; [PF00230] Major intrinsic protein
Mapoly0001s0229	140.187	201.431	215.95	180.808	184.594	3.61757	23.8759	96.1798	61.3918	48.9261	57.5934	1.10089	0.96563	-1.68038	6.76537	-1.88394	7.89102e-05	0.000679046
Mapoly0022s0010	14	38	21	29	25.5	1.78941	11	7	3	3	6	0.513906	0.188628	-2.08746	3.65157	-2.41398	8.12675e-05	0.000698176	[PTHR24193] ANKYRIN REPEAT PROTEIN; [KOG4214] Myotrophin and similar proteins; [PF12796] Ankyrin repeats (3 copies)
Mapoly0004s0216	67.5499	215.576	144.333	190.344	154.451	4.18842	19.3654	64.3688	62.0313	27.4923	43.3144	1.03263	1.00336	-1.83423	6.41962	-2.10474	8.13178e-05	0.000698298	[PF04577] Protein of unknown function (DUF563); [PTHR20961] GLYCOSYLTRANSFERASE; [KOG4698] Uncharacterized conserved protein; [GO:0016757] transferase activity, transferring glycosyl groups
Mapoly0021s0023	196	438	1171	339	536	8.13555	53	48	71	242	103.5	0.622898	2.2638	-2.3726	8.01788	-2.56335	8.22461e-05	0.000705641	[GO:0016020] membrane; [PF14570] RING/Ubox like zinc-binding domain; [PTHR13301] X-BOX TRANSCRIPTION FACTOR-RELATED; [GO:0016760] cellulose synthase (UDP-forming) activity; [GO:0030244] cellulose biosynthetic process; [PF03552] Cellulose synthase
Mapoly0002s0005	14	27	25	27	23.25	1.02903	7	5	9	5	6.5	0.217234	0.262538	-1.83872	3.64944	-2.16412	8.23475e-05	0.000706197
Mapoly0013s0095	6.92057	6.32644	13.211	6.14063	8.14966	4.88858	1	2	1.0159	0	1.00398	0.804349	0.225729	-3.02099	1.55252	-3.31361	8.33284e-05	0.000714291
Mapoly0096s0054	16	23	24	17	20	1.99533	2	6	7	4	4.75	0.368098	0.472489	-2.074	3.33943	-2.31182	8.5127e-05	0.000727768
Mapoly0036s0050	213	326	354	443	334	14.8974	48	135	83	153	104.75	3.69373	4.93403	-1.6729	7.65134	-1.8531	8.85964e-05	0.000755085
Mapoly0014s0085	4	15	16	10	11.25	1.84362	3	0	1	2	1.5	0.170427	0.228987	-2.90688	2.07016	-3.27196	8.86529e-05	0.000755234
Mapoly0066s0112	19	35	19	28	25.25	1.12608	6	6	9	7	7	0.228765	0.316506	-1.85085	3.77153	-2.10941	8.94379e-05	0.000760912
Mapoly0009s0200	4	15	3	6	7	1.00251	1	0	0	0	0.25	0.0514374	0	-4.80726	0.29445	-5.34848	9.4769e-05	0.00080308	[PF14259] RNA recognition motif (a.k.a. RRM, RBD, or RNP domain); [PTHR13976] HETEROGENEOUS NUCLEAR RIBONUCLEOPROTEIN-RELATED
Mapoly0109s0028	70	61	50	62	60.75	9.27871	36	25	15	7	20.75	3.94333	1.45528	-1.54977	5.14091	-1.84537	9.53531e-05	0.00080732	[PTHR22980] CORTISTATIN; [PF15630] Kinetochore component CENP-S
Mapoly0092s0081	94	228	381	147	212.5	6.03481	92	37	73	80	70.5	1.41223	1.92614	-1.59177	6.98687	-1.92051	9.78229e-05	0.000824972	[KOG4412] 26S proteasome regulatory complex, subunit PSMD10; [PTHR24158] FAMILY NOT NAMED; [PF12796] Ankyrin repeats (3 copies)
Mapoly0056s0012	3	9	1	11	6	3.0967	0	0	0	0	0	0	0	-18.4185	-15.2261	-18.9119	9.96882e-05	0.000838137
Mapoly0186s0016	121	139	120	121	125.25	4.49727	24	58	41	51	43.5	1.35587	1.54031	-1.52572	6.27459	-1.6999	0.000100843	0.000846003
Mapoly0009s0172	29	26	7	19	20.25	1.4807	6	1	2	6	3.75	0.202772	0.303032	-2.43295	3.13047	-2.61233	0.000101329	0.000848972
Mapoly0021s0006	28	21	15	18	20.5	1.3363	5	3	6	8	5.5	0.221737	0.440127	-1.89812	3.43418	-2.07659	0.000101416	0.000849328
Mapoly0088s0005	17555	20416	21200	22296	20366.8	876.813	2519	7788	5649	12702	7164.5	205.275	382.048	-1.50728	13.6627	-1.64333	0.000102909	0.000860342	[PTHR12270:SF6] GLYCOSYLTRANSFERASE-RELATED; [KOG3765] Predicted glycosyltransferase; [PF13896] Glycosyl-transferase for dystroglycan; [K09668] glycosyltransferase-like protein LARGE; [PTHR12270] GLYCOSYLTRANSFERASE-RELATED
Mapoly0081s0036	18	34	33	27	28	1.46864	5	8	12	7	8	0.298733	0.42567	-1.80735	3.95282	-2.08373	0.000105188	0.000878633	[PF02469] Fasciclin domain
Mapoly0056s0089	1	7	6	6	5	1.89767	0	0	0	0	0	0	0	-18.1554	-15.2261	-18.6888	0.000105439	0.000879658
Mapoly0021s0109	33	26	12	9	20	4.82198	7	4	3	4	4.5	1.15566	0.837389	-2.152	3.22685	-2.33902	0.000105711	0.000881095
Mapoly0070s0023	510	246	1068	271	523.75	24.6696	98	255	89	144	146.5	7.56926	5.14649	-1.83798	8.2022	-2.02508	0.000105928	0.000882524	[GO:0055114] oxidation-reduction process; [PF00141] Peroxidase; [GO:0020037] heme binding; [PTHR31235] FAMILY NOT NAMED; [GO:0006979] response to oxidative stress; [GO:0004601] peroxidase activity
Mapoly0032s0091	7	24	14	23	17	3.6197	3	2	7	1	3.25	0.429829	0.654696	-2.38702	2.89019	-2.7992	0.000108536	0.000902692
Mapoly0062s0045	151	157	124	133	141.25	8.18094	19	84	34	24	40.25	2.86033	1.50171	-1.81119	6.30018	-1.97295	0.00010902	0.000906326	[GO:0016021] integral to membrane; [PTHR23130] FAMILY NOT NAMED; [PF03188] Eukaryotic cytochrome b561
Mapoly0030s0049	62	67	68	91	72	2.73321	21	17	17	37	23	0.604196	0.987513	-1.64636	5.41991	-1.84415	0.000109652	0.000910639
Mapoly0027s0015	12	7	7	8	8.5	1.06741	4	1	0	0	1.25	0.25063	0	-2.76552	1.62704	-3.1549	0.000109809	0.00091131
Mapoly0195s0009	136	203	168	179	171.5	6.20302	28	97	32	47	51	2.10299	1.33649	-1.74964	6.63511	-1.91708	0.000114699	0.000947409
Mapoly0049s0116	24.4971	29.3733	36	29.4754	29.8364	2.00296	14	8	9.26455	8	9.81614	0.600036	0.516247	-1.60385	4.12134	-1.90797	0.00011747	0.00096947
Mapoly0037s0114	27	67	49	52	48.75	2.19039	15	1	24	2	10.5	0.259335	0.444148	-2.21501	4.44855	-2.69829	0.000118067	0.000973976	[KOG0157] Cytochrome P450 CYP4/CYP19/CYP26 subfamilies; [GO:0005506] iron ion binding; [GO:0055114] oxidation-reduction process; [GO:0016705] oxidoreductase activity, acting on paired donors, with incorporation or reduction of molecular oxygen; [PTHR24296] FAMILY NOT NAMED; [GO:0020037] heme binding; [PF00067] Cytochrome P450
Mapoly0004s0183	1	7	8	13	7.25	1.28969	1	0	1	0	0.5	0.0602923	0.0630263	-3.85793	0.879654	-4.44531	0.000118365	0.000976021
Mapoly0153s0021	63	61	71	42	59.25	3.17998	12	11	20	29	18	0.531013	1.2481	-1.71882	5.08731	-1.9027	0.000119935	0.000987272
Mapoly0101s0057	116	67	40	79	75.5	1.79367	9	18	42	21	22.5	0.323193	0.621672	-1.74655	5.36597	-1.94395	0.000127397	0.0010438
Mapoly0007s0158	12	19	34	17	20.5	1.82048	0	0	7	5	3	0	0.458043	-2.77258	3.03575	-3.05352	0.000133218	0.00108623
Mapoly0019s0066	48	58	63	54	55.75	3.09876	13	30	13	13	17.25	1.087	0.654933	-1.69237	5.02235	-1.89712	0.000136116	0.00110631
Mapoly0102s0029	14	31	24	35	26	1.25986	11	2	10	5	7	0.234003	0.304166	-1.89308	3.75287	-2.28875	0.000136949	0.0011112
Mapoly0042s0052	7	14	10	11	10.5	1.15029	5	1	0	1	1.75	0.248349	0.0579966	-2.58495	2.08497	-2.97426	0.000142312	0.00115181
Mapoly0112s0043	192	442	757	170	390.25	33.405	170	97	103	159	132.25	9.08892	10.2803	-1.56113	7.89117	-1.85433	0.000144122	0.001165
Mapoly0183s0021	241	237	610	204	323	8.60535	59	136	109	127	107.75	2.32385	2.8404	-1.58385	7.62943	-1.80413	0.000155767	0.00125283	[PF04632] Fusaric acid resistance protein family; [GO:0005886] plasma membrane; [GO:0006810] transport
Mapoly0034s0007	10	29	19	18	19	1.17936	5	0	7	4	4	0.109443	0.290864	-2.24792	3.12612	-2.62072	0.000158807	0.00127462
Mapoly0062s0093	8	28	12	21	17.25	1.41872	3	0	6	4	3.25	0.0868594	0.354473	-2.40808	2.92568	-2.74551	0.000163835	0.00131279	[PF00929] Exonuclease; [PTHR12801] EXONUCLEASE
Mapoly0008s0150	24	34	22	25	26.25	1.64755	1	12	3	5	5.25	0.400923	0.240028	-2.32192	3.65457	-2.42877	0.000164111	0.00131445
Mapoly0052s0069	10	11	6	5	8	1.13558	1	0	2	2	1.25	0.0526015	0.267013	-2.67806	1.67076	-2.89114	0.000164536	0.00131677
Mapoly0144s0018	8	13	7	11	9.75	1.41505	2	0	3	2	1.75	0.104132	0.318721	-2.47804	2.04612	-2.80336	0.000167585	0.00133894
Mapoly0029s0148	272	81	128	112	148.25	11.1647	6	60	11	30	26.75	2.6052	1.87449	-2.47042	6.04865	-2.48765	0.000168096	0.00134191	[PF00280] Potato inhibitor I family; [GO:0009611] response to wounding; [GO:0004867] serine-type endopeptidase inhibitor activity
Mapoly0073s0019	38	52	58	33	45.25	1.23583	14	15	15	18	15.5	0.331202	0.417754	-1.54565	4.78211	-1.77532	0.000169071	0.00134858
Mapoly0003s0220	20	23	29	22	23.5	1.30618	5	5	2	10	5.5	0.236858	0.337013	-2.09515	3.60168	-2.25305	0.000171869	0.00136863
Mapoly0083s0053	9	9	12	4	8.5	1.05616	3	0	2	0	1.25	0.135025	0.0940986	-2.76552	1.60504	-3.26679	0.000172844	0.00137584
Mapoly0048s0061	49	73	58	88	67	1.40229	16	11	49	13	22.25	0.23225	0.523851	-1.59036	5.27045	-1.95119	0.000175931	0.0013981	[PTHR32133] FAMILY NOT NAMED; [GO:0005515] protein binding; [PF00646] F-box domain
Mapoly0084s0032	0	11	8	5	6	2.20878	0	0	0	0	0	0	0	-18.4185	-15.2261	-18.9598	0.000180467	0.00143002	[PTHR31301] FAMILY NOT NAMED; [PF03195] Protein of unknown function DUF260
Mapoly0854s0001	21	32	84	19	39	1.95122	2	0	1	12	3.75	0.0346896	0.328825	-3.37851	3.75476	-3.49347	0.000184994	0.00146289	[GO:0016020] membrane; [PTHR31632] FAMILY NOT NAMED; [GO:0006827] high-affinity iron ion transport; [GO:0033573] high affinity iron permease complex; [GO:0005381] iron ion transmembrane transporter activity; [PF03239] Iron permease FTR1 family
Mapoly0148s0002	12.8478	19.3624	13.8011	19.4737	16.3712	2.41551	6.60231	5	4.6278	1.29645	4.38164	0.713417	0.356265	-1.90162	3.08534	-2.23855	0.000186225	0.00147141
Mapoly0001s0395	35	67	82	69	63.25	4.08804	19	28	21	19	21.75	1.30942	1.13633	-1.54005	5.28144	-1.80667	0.000187059	0.0014774
Mapoly0118s0044	17	24	40	18	24.75	1.94851	3	1	6	10	5	0.121654	0.58719	-2.30742	3.56039	-2.52431	0.000187403	0.00147951
Mapoly0122s0023	127	992	1185	264	642	49.462	239	81	273	173	191.5	9.32879	14.4171	-1.74523	8.49044	-2.125	0.000187961	0.0014827	[KOG3416] Predicted nucleic acid binding protein; [PTHR13356] OB FOLD NUCLEIC ACID BINDING PROTEIN-RELATED
Mapoly0050s0032	5	5	6	1	4.25	4.16351	0	0	0	0	0	0	0	-17.921	-15.2261	-18.3631	0.000198681	0.00155708
Mapoly0001s0067	21	28	30	31	27.5	1.34468	17	3	9	6	8.75	0.367048	0.318313	-1.65207	3.94407	-2.03532	0.000207785	0.00162184
Mapoly0169s0031	57	132	147	124	115	5.01264	1	37	1	10	12.25	0.7981	0.242784	-3.23078	5.38174	-3.33713	0.000209422	0.00163197
Mapoly0032s0147	42	116	122	118	99.5	2.6856	4	38	10	25	19.25	0.533056	0.44755	-2.36984	5.5875	-2.52082	0.000215085	0.00166868
Mapoly0064s0034	33	75	73	94	68.75	1.60997	9	27	1	13	12.5	0.379678	0.166675	-2.45943	4.99664	-2.62653	0.000217902	0.00168647	[GO:0055114] oxidation-reduction process; [GO:0005515] protein binding; [1.13.11.12] Linoleate 13S-lipoxygenase.; [GO:0016702] oxidoreductase activity, acting on single donors with incorporation of molecular oxygen, incorporation of two atoms of oxygen; [PTHR11771] LIPOXYGENASE; [PF01477] PLAT/LH2 domain; [GO:0046872] metal ion binding; [K00454] lipoxygenase [EC:1.13.11.12]; [PF00305] Lipoxygenase
Mapoly0069s0008	0	13.0246	8	11.0347	8.01483	1.15441	0	0	1.00103	0	0.250258	0	0.0513462	-5.00109	0.467525	-5.54633	0.000218026	0.00168675
Mapoly0008s0097	129	9	6	1	36.25	2.52286	3	2	2	1	2	0.174793	0.108289	-4.1799	2.95593	-4.21632	0.000223039	0.0017207	[PTHR18952] CARBONIC ANHYDRASE; [PF00194] Eukaryotic-type carbonic anhydrase; [KOG0382] Carbonic anhydrase
Mapoly0057s0019	50	29	20	22	30.25	1.88783	11	7	5	12	8.75	0.489706	0.546244	-1.78958	4.03956	-1.92983	0.000223656	0.00172466	[K13993] HSP20 family protein; [KOG0710] Molecular chaperone (small heat-shock protein Hsp26/Hsp42); [PTHR11527] SMALL HEAT-SHOCK PROTEIN (HSP20) FAMILY; [PF00011] Hsp20/alpha crystallin family
Mapoly1969s0001	152	278	212	278	230	16.3228	38	96	57	113	76	4.30627	5.72692	-1.59756	7.14576	-1.76729	0.000223818	0.00172466
Mapoly0014s0076	20	25	42	32	29.75	2.82857	6	11	11	8	9	0.710391	0.781316	-1.72489	4.09788	-1.98815	0.000223909	0.00172466
Mapoly0009s0029	14	33	22	21	22.5	1.28041	5	8	5	6	6	0.325611	0.286193	-1.90689	3.60671	-2.13119	0.000227031	0.00174452
Mapoly0059s0081	344	282	126	220	243	2.71745	62	134	15	21	58	1.03795	0.196398	-2.06683	6.92638	-2.20437	0.000230561	0.00176742	[PTHR14919] KPL2-RELATED; [PTHR14919:SF0] SUBFAMILY NOT NAMED
Mapoly0100s0002	40	55	33	53	45.25	1.83408	1	19	10	10	10	0.399875	0.36974	-2.17792	4.50055	-2.31765	0.000235088	0.00179783
Mapoly0029s0039	186.309	501.278	383.172	485.785	389.136	15.0333	92	61.1951	166.556	225.428	136.295	2.56793	7.16078	-1.51354	7.92544	-1.7581	0.000238083	0.00181788	[PTHR15750] FAMILY NOT NAMED; [GO:0005737] cytoplasm; [PF14822] Vasohibin; [PTHR15750:SF2] SUBFAMILY NOT NAMED; [GO:0045765] regulation of angiogenesis
Mapoly0040s0034	43204	27035	25714	31937	31972.5	1573.54	2944	13067	7218	19067	10574	383.479	653.348	-1.59631	14.2539	-1.66654	0.000251038	0.00191223	[KOG4742] Predicted chitinase; [GO:0006032] chitin catabolic process; [GO:0004568] chitinase activity; [PTHR22595] CHITINASE-RELATED; [GO:0016998] cell wall macromolecule catabolic process; [PF00182] Chitinase class I
Mapoly0052s0122	12	66	47	59	46	1.47018	13	12	17	10	13	0.327915	0.360959	-1.82312	4.66287	-2.15743	0.000254689	0.00193469	[PF00225] Kinesin motor domain; [GO:0005524] ATP binding; [PTHR24115] FAMILY NOT NAMED; [KOG0242] Kinesin-like protein; [GO:0005871] kinesin complex; [GO:0007018] microtubule-based movement; [GO:0008017] microtubule binding; [PTHR24115:SF221] SUBFAMILY NOT NAMED; [GO:0003777] microtubule motor activity
Mapoly0051s0052	1	6	9	3	4.75	2.34288	0	0	0	0	0	0	0	-18.0814	-15.2261	-18.6224	0.000255611	0.00194094
Mapoly1940s0001	61	108	115	111	98.75	3.82596	36	0	0	0	9	0.490091	0	-3.45578	4.80462	-4.02897	0.000256289	0.00194455	[PTHR31549] FAMILY NOT NAMED; [PF03140] Plant protein of unknown function
Mapoly0058s0091	9	12	21	11	13.25	1.40008	0	5	2	2	2.25	0.258262	0.188349	-2.55799	2.5654	-2.71636	0.000261482	0.00197463
Mapoly0091s0032	6	12	12	7	9.25	1.75939	4	0	3	0	1.75	0.26909	0.210969	-2.40209	1.92683	-2.93536	0.000262223	0.00197945
Mapoly1721s0003	36	75	30	56	49.25	5.61718	2	22	3	7	8.5	1.33238	0.554799	-2.53459	4.46691	-2.64045	0.000264123	0.00199223
Mapoly0009s0098	7	8	9	17	10.25	2.06393	0	4	1	0	1.25	0.393216	0.0738193	-3.03561	1.94704	-3.2095	0.00027818	0.00208198
Mapoly0062s0104	19.9358	33.0548	23.5769	19	23.8919	1.55519	2.53946	4.50226	7.80947	9.883	6.18355	0.205999	0.536025	-1.95001	3.67372	-2.13205	0.00028161	0.00210438	[PF00657] GDSL-like Lipase/Acylhydrolase; [PTHR22835] ZINC FINGER FYVE DOMAIN CONTAINING PROTEIN; [GO:0016788] hydrolase activity, acting on ester bonds; [GO:0006629] lipid metabolic process
Mapoly0005s0240	6	13	26	8	13.25	1.69394	1	0	4	3	2	0.0442297	0.383011	-2.72791	2.42067	-3.05169	0.000287141	0.00214239
Mapoly0056s0027	73	150	104	97	106	4.79268	6	17	75	9	26.75	0.478005	1.47759	-1.98645	5.72623	-2.3539	0.000291002	0.00216869	[KOG0710] Molecular chaperone (small heat-shock protein Hsp26/Hsp42); [PTHR11527] SMALL HEAT-SHOCK PROTEIN (HSP20) FAMILY; [PF00011] Hsp20/alpha crystallin family
Mapoly0073s0058	28	50	33	46	39.25	3.83062	0	16	1	6	5.75	0.772619	0.346943	-2.77106	4.04947	-2.84239	0.000294998	0.00219592
Mapoly0012s0023	8	23	34	38	25.75	1.08967	9	2	11	3	6.25	0.170696	0.23143	-2.04264	3.66765	-2.49959	0.000298401	0.00221612
Mapoly0081s0016	354	378	1960	165	714.25	22.776	228	172	192	228	205	5.11371	5.91903	-1.80081	8.65542	-2.11529	0.000307824	0.00227646	[PTHR31403] FAMILY NOT NAMED; [PF01764] Lipase (class 3); [KOG4569] Predicted lipase; [GO:0006629] lipid metabolic process
Mapoly0088s0032	82	37	104	37	65	6.86704	19	32	20	10	20.25	2.43929	1.37553	-1.68252	5.21136	-1.91461	0.000309203	0.00228578
Mapoly0010s0014	5	16	12	7	10	1.25497	0	3	3	0	1.5	0.184713	0.138706	-2.73695	2.00167	-3.02125	0.000312559	0.00230487
Mapoly0060s0115	12	23	32	23	22.5	1.39853	4	10	5	3	5.5	0.388272	0.210268	-2.03242	3.55208	-2.29103	0.000320567	0.00235983	[PF03018] Dirigent-like protein
Mapoly0125s0004	4	3	2	6	3.75	1.25293	0	0	0	0	0	0	0	-17.7404	-15.2261	-18.1995	0.00032395	0.0023802
Mapoly0092s0042	54	94	60	72	70	4.47	15	32	14	29	22.5	1.35925	1.32222	-1.63743	5.39592	-1.80297	0.000325559	0.00239111
Mapoly0152s0032	6	42	25	52	31.25	1.39564	6	3	8	9	6.5	0.155976	0.3341	-2.26534	3.90568	-2.57226	0.00032853	0.00240926
Mapoly0002s0023	28	18	32	29	26.75	1.27909	6	14	7	2	7.25	0.437355	0.176783	-1.88348	3.84216	-2.12375	0.000337654	0.00246679
Mapoly0129s0008	257	556	435	439	421.75	13.4549	408	80	65	39	148	5.84951	1.42096	-1.51079	7.93056	-1.95256	0.000357589	0.00259182	[GO:0016787] hydrolase activity; [KOG1592] Asparaginase; [K13051] beta-aspartyl-peptidase (threonine type) [EC:3.4.19.5]; [3.4.19.5] Beta-aspartyl-peptidase.; [PTHR10188] L-ASPARAGINASE; [PF01112] Asparaginase
Mapoly0164s0002	8	27	14	27	19	4.3856	8	2	3	5	4.5	0.869632	0.854757	-2.078	3.24341	-2.41009	0.000362029	0.00262006	[GO:0016758] transferase activity, transferring hexosyl groups; [PF00201] UDP-glucoronosyl and UDP-glucosyl transferase; [PTHR11926] GLUCOSYL/GLUCURONOSYL TRANSFERASES; [GO:0008152] metabolic process
Mapoly0135s0045	40	200	249	215	176	4.01748	44	18	55	78	48.75	0.53927	1.3582	-1.8521	6.61869	-2.14685	0.000367868	0.00265534	[KOG0039] Ferric reductase, NADH/NADPH oxidase and related proteins; [PF08022] FAD-binding domain; [GO:0055114] oxidation-reduction process; [PTHR11972] NADPH OXIDASE; [PF01794] Ferric reductase like transmembrane component; [GO:0016491] oxidoreductase activity; [PTHR11972:SF5] RESPIRATORY BURST OXIDASE; [PF08030] Ferric reductase NAD binding domain
Mapoly0037s0033	10	11	12	7	10	1.10084	0	1	2	4	1.75	0.0553474	0.320522	-2.51456	2.16847	-2.6156	0.000376229	0.00270759
Mapoly0009s0051	66	172	206	129	143.25	2.40159	43	14	77	58	48	0.36476	0.975218	-1.57743	6.41741	-1.90561	0.00038089	0.00273909
Mapoly0021s0033	4	14	36	32	21.5	1.11258	0	5	6	1	3	0.146219	0.163117	-2.8413	3.08996	-3.17747	0.00038317	0.00275446	[PTHR10774] EXTENDED SYNAPTOTAGMIN-RELATED; [PF00168] C2 domain; [GO:0005515] protein binding
Mapoly0014s0116	11	8	0	10	7.25	2.78165	2	0	0	0	0.5	0.288665	0	-3.85793	0.784521	-4.32862	0.000414003	0.00296175
Mapoly0042s0056	73	99	80	75	81.75	4.22953	19	43	12	31	26.25	1.30481	1.1082	-1.6389	5.61826	-1.79071	0.000419996	0.00300017
Mapoly0086s0011	30	78	65	63	59	2.97202	16	20	37	6	19.75	0.774075	0.84104	-1.57886	5.10853	-1.94254	0.000421813	0.00301092	[KOG1339] Aspartyl protease; [PF14543] Xylanase inhibitor N-terminal; [PTHR13683] ASPARTYL PROTEASES; [PF14541] Xylanase inhibitor C-terminal; [GO:0004190] aspartic-type endopeptidase activity; [GO:0006508] proteolysis
Mapoly0012s0186	19	65	49	65	49.5	2.359	8	16	21	15	15	0.501277	0.734256	-1.72246	4.84016	-1.99673	0.000438026	0.00311168
Mapoly0046s0050	14	14	14	20	15.5	13.6035	4	5	8	0	4.25	3.43626	2.62187	-1.86673	3.00834	-2.22827	0.000448077	0.0031688
Mapoly0028s0031	8	19	12	16	13.75	1.41068	0	6	3	1	2.5	0.302453	0.167614	-2.45942	2.64227	-2.65099	0.000466788	0.00329055
Mapoly0096s0025	2	6	5	2	3.75	1.03197	0	0	0	0	0	0	0	-17.7404	-15.2261	-18.2354	0.000469041	0.00330345
Mapoly0061s0089	44	62	50	74	57.5	3.42088	17	30	10	20	19.25	1.24158	0.851667	-1.5787	5.13539	-1.77395	0.0004782	0.00336116	[K14423] 4,4-dimethyl-9beta,19-cyclopropylsterol-4alpha-methyl oxidase [EC:1.14.13.72]; [GO:0005506] iron ion binding; [GO:0055114] oxidation-reduction process; [KOG0873] C-4 sterol methyl oxidase; [GO:0006633] fatty acid biosynthetic process; [GO:0016491] oxidoreductase activity; [PF04116] Fatty acid hydroxylase superfamily; [1.14.13.72] Methylsterol monooxygenase.; [PTHR11863] STEROL DESATURASE
Mapoly0052s0035	3	5	9	13	7.5	2.20193	0	2	0	1	0.75	0.280187	0.150224	-3.3219	1.42356	-3.42259	0.000478576	0.00336259
Mapoly0109s0043	8	10	20	3	10.25	1.72941	4	1	0	1	1.5	0.322062	0.0891591	-2.77258	1.97267	-3.1414	0.000479359	0.00336686
Mapoly0025s0093	16	53	26	32	31.75	1.17693	5	13	10	0	7	0.302514	0.136915	-2.18133	3.93106	-2.48583	0.00049913	0.00348416
Mapoly0032s0139	93	101	148	119	115.25	2.3946	18	71	25	33	36.75	0.860106	0.555017	-1.64895	6.11738	-1.8256	0.000514153	0.00356953	[PTHR10887] DNA2/NAM7 HELICASE FAMILY; [KOG1807] Helicases; [PF13086] AAA domain; [PF13087] AAA domain
Mapoly0009s0177	240	145	227	87	174.75	6.76764	125	3	34	23	46.25	1.84501	0.998012	-1.91777	6.41584	-2.31522	0.000514231	0.00356953
Mapoly0009s0219	64	84	64	65	69.25	3.55037	22	2	26	33	20.75	0.457829	1.41203	-1.7387	5.27658	-1.98792	0.000520592	0.00360785
Mapoly0035s0027	13	15	26	19	18.25	1.55287	10	4	5	4	5.75	0.465511	0.334824	-1.66626	3.37305	-2.02103	0.000542393	0.00373345
Mapoly0021s0160	1	8	2	5	4	1.99562	0	0	0	0	0	0	0	-17.8335	-15.2261	-18.3395	0.000542734	0.00373447
Mapoly0011s0099	14	12	13	12	12.75	1.14389	5	5	4	1	3.75	0.389022	0.184556	-1.76553	2.79019	-2.06003	0.000546951	0.0037608
Mapoly0002s0212	258	175	126	139	174.5	6.78386	13	72	34	78	49.25	1.64481	2.20764	-1.82503	6.60986	-1.88141	0.000548224	0.00376308
Mapoly0014s0225	14	13	12	18	14.25	1.69793	1	3	6	5	3.75	0.221657	0.588194	-1.92599	2.92722	-2.13018	0.000564569	0.00386266
Mapoly0111s0033	11	18	18	39	21.5	1.79406	5	2	13	1	5.25	0.225375	0.436678	-2.03394	3.38771	-2.49603	0.000582481	0.00397462	[GO:0005840] ribosome; [PTHR11449] RIBOSOMAL PROTEIN L30; [GO:0003735] structural constituent of ribosome; [GO:0005622] intracellular; [PF01248] Ribosomal protein L7Ae/L30e/S12e/Gadd45 family; [PTHR11449:SF1] 60S RIBOSOMAL PROTEIN L30; [GO:0006412] translation
Mapoly0003s0218	60	136	89	153	109.5	13.7018	28	23	26	64	35.25	2.63632	5.3903	-1.63524	6.05062	-1.83555	0.000585607	0.00399306
Mapoly0197s0020	40	49	37	57	45.75	1.62102	6	21	19	16	15.5	0.446824	0.554768	-1.5615	4.80209	-1.7582	0.00061408	0.0041674	[GO:0005524] ATP binding; [KOG1187] Serine/threonine protein kinase; [PF00069] Protein kinase domain; [GO:0004672] protein kinase activity; [GO:0006468] protein phosphorylation; [PF00139] Legume lectin domain; [GO:0030246] carbohydrate binding; [PTHR24420] LEUCINE-RICH REPEAT RECEPTOR-LIKE PROTEIN KINASE
Mapoly0071s0063	6	12	11	11	10	1.56602	6	0	2	1	2.25	0.330572	0.19743	-2.15199	2.19788	-2.63122	0.000617589	0.00418532
Mapoly0054s0118	2	8	3	6	4.75	1.04999	1	0	0	0	0.25	0.077699	0	-4.24783	0.0300497	-4.81968	0.000627323	0.00424533	[GO:0016020] membrane; [PTHR11101] PHOSPHATE TRANSPORTER; [PF01384] Phosphate transporter family; [GO:0006817] phosphate ion transport; [GO:0005315] inorganic phosphate transmembrane transporter activity
Mapoly0010s0135	158	127	149	107	135.25	4.23348	17	82	39	45	45.75	1.60697	1.33745	-1.56378	6.37017	-1.70083	0.000645896	0.00435269	[PF12819] Carbohydrate-binding protein of the ER; [PTHR24420] LEUCINE-RICH REPEAT RECEPTOR-LIKE PROTEIN KINASE
Mapoly0048s0035	5	7	5	7	6	3.5661	2	2	0	0	1	1.01691	0	-2.58494	1.31356	-2.87673	0.00065082	0.00437822
Mapoly0008s0156	27.6466	46.2569	49.0051	36.6321	39.8852	1.14054	5.94691	13.3018	13.1515	18.7409	12.7853	0.249785	0.426006	-1.64137	4.58495	-1.83408	0.00068612	0.00458336	[PF10498] Intra-flagellar transport protein 57; [K04638] estrogen-related receptor beta like 1; [KOG0972] Huntingtin interacting protein 1 (Hip1) interactor Hippi; [PTHR16011] IFT57/HIPPI
Mapoly0027s0089	4	11	10	15	10	1.03281	3	0	3	2	2	0.107267	0.218878	-2.32192	2.17377	-2.72416	0.000698515	0.00465042
Mapoly0004s0220	3.00002	7.00004	2.00004	2	3.50003	1.30197	0	0	0	0	0	0	0	-17.6409	-15.2261	-18.085	0.000706511	0.00470128
Mapoly0025s0130	26	49	23	66	41	1.74742	10	22	11	5	12	0.613496	0.286356	-1.77259	4.52889	-2.02648	0.000729844	0.00483064	[PTHR14154:SF2] BRAIN PROTEIN 44/YHR162W(YEAST); [PTHR14154] UPF0041 BRAIN PROTEIN 44-RELATED; [GO:0006850] mitochondrial pyruvate transport; [GO:0005743] mitochondrial inner membrane; [KOG1589] Uncharacterized conserved protein; [PF03650] Uncharacterised protein family (UPF0041)
Mapoly0112s0039	44	89	67	87	71.75	6.17892	32	13	36	0	20.25	1.52109	1.14263	-1.82506	5.21528	-2.27502	0.000735387	0.00486066
Mapoly0029s0135	19	19	41	18	24.25	1.14066	5	7	13	6	7.75	0.244622	0.374052	-1.64571	3.81574	-1.94735	0.000776326	0.00511198	[PTHR16223] FAMILY NOT NAMED
Mapoly0144s0007	234583	73193	78402	82307	117121	5815.27	3902	54560	9746	39389	26899.2	1528.1	1320.12	-2.12237	15.8481	-2.09537	0.000828454	0.00539811	[GO:0005515] protein binding; [PTHR31718] FAMILY NOT NAMED; [PF01477] PLAT/LH2 domain
Mapoly0122s0016	11	19	21	11	15.5	1.26696	5	3	7	4	4.75	0.265981	0.385175	-1.70627	3.12327	-2.02466	0.000840571	0.00546598
Mapoly0002s0154	91	216	191	207	176.25	5.52391	7	97	7	22	33.25	1.55781	0.44045	-2.4062	6.39292	-2.53536	0.000936601	0.00600939
Mapoly0170s0035	10	11	25	4	12.5	1.65169	3	0	0	4	1.75	0.140208	0.279058	-2.83649	2.30738	-3.04703	0.000955565	0.00611479
Mapoly0063s0005	9	12	10	14	11.25	1.24316	1	3	5	3	3	0.203585	0.381703	-1.90688	2.59102	-2.14927	0.000962016	0.00614791
Mapoly0146s0014	6	5	6	3	5	1.06251	2	0	1	0	0.75	0.155398	0.0812224	-2.73694	0.844145	-3.22869	0.000968586	0.0061817	[PTHR31262] FAMILY NOT NAMED; [4.1.1.39] Ribulose-bisphosphate carboxylase.; [PF00101] Ribulose bisphosphate carboxylase, small chain; [K01602] ribulose-bisphosphate carboxylase small chain [EC:4.1.1.39]
Mapoly0068s0089	28	21	53	22	31	1.99052	14	1	6	13	8.5	0.350724	0.58509	-1.86673	4.05754	-2.15465	0.000980264	0.00623805
Mapoly0140s0007	7	8	22	10	11.75	1.31499	4	1	4	3	3	0.209497	0.336448	-1.96962	2.60068	-2.33308	0.000987172	0.00626921
Mapoly0098s0027	3	4	2	3	3	2.02483	0	0	0	0	0	0	0	-17.4185	-15.2261	-17.869	0.000988557	0.00627342
Mapoly0002s0080	34	68	157	23	70.5	3.40101	40	10	15	18	20.75	0.901014	0.710999	-1.76451	5.28482	-2.14532	0.000992012	0.00628752	[PF02519] Auxin responsive protein
Mapoly0005s0211	8	25	7	14	13.5	1.10157	8	2	1	1	3	0.314371	0.073988	-2.16992	2.63938	-2.56834	0.00099985	0.00632009
Mapoly0001s0251	21	95	60	73	62.25	6.75513	20	16	26	26	22	1.59634	2.49194	-1.50057	5.27305	-1.78855	0.0010001	0.00632009
Mapoly0089s0035	4	3	5	4	4	1.21453	1	0	0	0	0.25	0.108772	0	-3.99991	-0.107196	-4.54519	0.00106479	0.00667207
Mapoly0006s0152	50.7044	151.452	95.0138	88.7835	96.4884	2.07142	16.6852	37.8178	31.7343	47.9808	33.5545	0.525356	0.794098	-1.52385	5.92134	-1.71635	0.00107111	0.00670078
Mapoly0138s0051	1	8	16	8	8.25	1.89028	0	0	3	1	1	0	0.358561	-3.04437	1.56582	-3.45973	0.00107711	0.00673395
Mapoly0084s0026	53	49	66	52	55	1.67485	7	36	17	11	17.75	0.623495	0.373247	-1.63161	5.03844	-1.81484	0.00115759	0.00716507	[GO:0016021] integral to membrane; [PTHR11062] EXOSTOSIN (HEPARAN SULFATE GLYCOSYLTRANSFERASE)-RELATED; [KOG1021] Acetylglucosaminyltransferase EXT1/exostosin 1; [PF03016] Exostosin family; [K02366] glucuronyl/N-acetylglucosaminyl transferase EXT1 [EC:2.4.1.224 2.4.1.225]; [2.4.1.224] Glucuronosyl-N-acetylglucosaminyl-proteoglycan 4-alpha-N- acetylglucosaminyltransferase.; [GO:0015012] heparan su…
Mapoly0013s0087	12	20	35	13	20	1.21904	8	4	11	3	6.5	0.289314	0.340674	-1.62149	3.51544	-2.01683	0.00117859	0.00728208
Mapoly0002s0099	69	59	240	46	103.5	2.85419	69	16	30	25	35	0.8753	0.658621	-1.5642	5.92369	-1.96325	0.00118703	0.00731447
Mapoly0016s0057	8	17	24	20	17.25	1.01382	7	5	5	5	5.5	0.284392	0.25852	-1.64909	3.33898	-1.96621	0.00122957	0.00754283
Mapoly0179s0019	11	6	8	9	8.5	1.6053	4	0	4	1	2.25	0.276362	0.392027	-1.91753	2.0596	-2.32374	0.00124581	0.00762552
Mapoly0006s0208	16	36	18	25	23.75	2.25625	4	12	10	4	7.5	0.701096	0.556152	-1.66296	3.78815	-1.90783	0.00124938	0.0076425	[KOG1187] Serine/threonine protein kinase; [PF07714] Protein tyrosine kinase; [GO:0004672] protein kinase activity; [GO:0006468] protein phosphorylation; [PTHR24420] LEUCINE-RICH REPEAT RECEPTOR-LIKE PROTEIN KINASE
Mapoly0042s0075	60	51	219	31	90.25	2.01214	6	33	12	28	19.75	0.402515	0.421131	-2.19207	5.52915	-2.35916	0.00126268	0.00771408	[KOG1187] Serine/threonine protein kinase; [PF07714] Protein tyrosine kinase; [GO:0004672] protein kinase activity; [GO:0006468] protein phosphorylation; [PTHR24420] LEUCINE-RICH REPEAT RECEPTOR-LIKE PROTEIN KINASE
Mapoly0008s0229	6	10	5	10	7.75	1.13645	0	4	0	1	1.25	0.2917	0.0781981	-2.63225	1.77865	-2.68703	0.0013254	0.00803363	[GO:0016192] vesicle-mediated transport; [PTHR21136] SNARE PROTEINS; [GO:0016021] integral to membrane; [PF00957] Synaptobrevin; [PF13774] Regulated-SNARE-like domain; [KOG0859] Synaptobrevin/VAMP-like protein
Mapoly0086s0020	7	21	11	21	15	1.5773	0	5	3	5	3.25	0.256402	0.390465	-2.20644	2.92809	-2.3507	0.00138268	0.00833107
Mapoly0003s0177	4	16	19	10	12.25	1.7799	3	3	4	2	3	0.360425	0.359954	-2.02974	2.64821	-2.37064	0.00138881	0.00836278
Mapoly0061s0055	13	32	43	28	29	2.21812	10	1	11	12	8.5	0.302437	0.780819	-1.77052	4.02113	-2.09818	0.00143438	0.00859693
Mapoly0085s0001	27	13	26	20	21.5	1.34199	17	5	4	3	7.25	0.544022	0.196617	-1.56828	3.6084	-1.92184	0.00143564	0.00859945	[GO:0005507] copper ion binding; [GO:0009055] electron carrier activity; [PF02298] Plastocyanin-like domain
Mapoly0126s0045	111	36	17	21	46.25	1.93719	20	0	2	11	8.25	0.334637	0.309719	-2.48698	4.21204	-2.65039	0.00147727	0.00882109	[PTHR10891] EF-HAND CALCIUM-BINDING DOMAIN CONTAINING PROTEIN; [PF13499] EF-hand domain pair; [GO:0005509] calcium ion binding; [KOG0027] Calmodulin and related proteins (EF-Hand superfamily)
Mapoly0040s0078	21	31	18	32	25.5	1.22265	21	6	5	4	9	0.503645	0.192136	-1.5025	3.89974	-1.87657	0.00149125	0.0089018	[PF00264] Common central domain of tyrosinase; [PF12142] Polyphenol oxidase middle domain; [GO:0055114] oxidation-reduction process; [PTHR11474] TYROSINASE; [GO:0016491] oxidoreductase activity; [GO:0008152] metabolic process; [GO:0004097] catechol oxidase activity
Mapoly0282s0002	126	139	167	140	143	4.19142	4	42	3	57	26.5	0.653733	0.923262	-2.43195	6.09122	-2.47788	0.00150327	0.00896244	[PTHR11005:SF6] gb def: lipase 2 [drosophila melanogaster]; [PTHR11005] LYSOSOMAL ACID LIPASE-RELATED; [PF04083] Partial alpha/beta-hydrolase lipase region; [KOG2624] Triglyceride lipase-cholesterol esterase; [PF12697] Alpha/beta hydrolase family; [GO:0006629] lipid metabolic process
Mapoly0040s0062	362	20	70	10	115.5	4.85504	29	26	21	6	20.5	1.14397	0.542359	-2.4942	5.50033	-2.58794	0.00163886	0.00963971	[GO:0016762] xyloglucan:xyloglucosyl transferase activity; [GO:0048046] apoplast; [GO:0006073] cellular glucan metabolic process; [PTHR31062] FAMILY NOT NAMED; [PF06955] Xyloglucan endo-transglycosylase (XET) C-terminus; [GO:0004553] hydrolase activity, hydrolyzing O-glycosyl compounds; [GO:0005975] carbohydrate metabolic process; [PF00722] Glycosyl hydrolases family 16; [2.4.1.207] Xyloglucan:xy…

## Sheet: Sheet2
Supplementary File 1. List of genes with changed mRNA levels in Mprkd archegonia
Sheet 2: Genes with increased mRNA levels in Mprkd archegonia
Gene ID	WT_rep1	WT_rep2	WT_rep3	WT_rep4	WT_average	WT_FPKM	Mprkd-1_rep1	Mprkd-1_rep2	Mprkd-3_rep1	Mprkd-3_rep2	Mprkd_average	Mprkd-1_FPKM	Mprkd-3_FPKM	LOG2FC	a.value	m.value	p.value	q.value	Short_description
Mapoly0114s0053	336	132	190	143	200.25	18.6495	1687	715	1617	655	1168.5	93.9378	93.4381	2.54419	8.87359	2.26663	1.54451e-14	5.44587e-13	[PTHR31262] FAMILY NOT NAMED; [4.1.1.39] Ribulose-bisphosphate carboxylase.; [PF00101] Ribulose bisphosphate carboxylase, small chain; [K01602] ribulose-bisphosphate carboxylase small chain [EC:4.1.1.39]
Mapoly0014s0081	274	316	470	399	364.75	11.9273	3950	1220	4339	1376	2721.25	65.1662	76.0276	2.89895	9.94983	2.50303	8.95058e-14	2.94088e-12	[GO:0016020] membrane; [PF01554] MatE; [GO:0015238] drug transmembrane transporter activity; [GO:0015297] antiporter activity; [GO:0055085] transmembrane transport; [PTHR11206] MULTIDRUG RESISTANCE PROTEIN; [KOG1347] Uncharacterized membrane protein, predicted efflux pump; [GO:0006855] drug transmembrane transport
Mapoly0184s0026	5669	4260	2549	3552	4007.5	348.246	24439	9764	24374	11333	17477.5	1231.05	1372.38	2.1247	12.9966	1.84062	1.50162e-13	4.82696e-12	[PF04525] Tubby C 2; [PTHR31087] FAMILY NOT NAMED
Mapoly0024s0040	408.347	303.81	462.785	314	372.236	8.6929	1533.64	1206.02	1425.96	1239.79	1351.35	27.1067	28.1933	1.85984	9.49578	1.60482	3.67536e-13	1.13419e-11
Mapoly0045s0014	58	39	22	32	37.75	1.05533	282	332	277	244	283.75	7.80685	6.85272	2.90676	6.70115	2.73496	6.11128e-13	1.8331e-11	[PTHR32133] FAMILY NOT NAMED; [GO:0005515] protein binding; [PF00646] F-box domain
Mapoly0037s0069	597	378	388	520	470.75	22.2609	4459	921	4827	1999	3051.5	99.3759	138.993	2.69623	10.1917	2.36	1.36845e-12	3.98088e-11
Mapoly0015s0035	6145	1928	2120	3094	3321.75	317.472	44167	11640	37352	8456	25403.8	2195.43	1878.96	2.93499	13.0848	2.6219	2.85069e-11	7.16479e-10
Mapoly0007s0137	23	29	23	21	24	1.41349	166	189	184	150	172.25	9.12681	8.85353	2.83824	6.04091	2.60461	3.16661e-11	7.91119e-10	[PF12617] Iron-Sulfur binding protein C terminal; [PTHR19248] ATP-BINDING TRANSPORT PROTEIN-RELATED
Mapoly0157s0023	3624	1976	2172	1971	2435.75	68.4226	10830	5889	9194	4904	7704.25	198.888	176.973	1.66125	12.0574	1.3949	3.5592e-11	8.78954e-10	[PTHR31642] FAMILY NOT NAMED; [GO:0016747] transferase activity, transferring acyl groups other than amino-acyl groups; [PF02458] Transferase family
Mapoly0007s0136	492	421	437	410	440	11.1333	1259	1475	1522	1140	1349	20.819	20.4733	1.61609	9.61783	1.38292	3.96893e-11	9.71431e-10	[GO:0005737] cytoplasm; [PTHR11476] HISTIDYL-TRNA SYNTHETASE; [PF13393] Histidyl-tRNA synthetase
Mapoly0168s0011	424	219	261	261	291.25	8.03538	881	866	1628	976	1087.75	21.3383	32.3032	1.90065	9.13956	1.67664	4.1497e-11	1.01439e-09
Mapoly0015s0037	24	21	22	56	30.75	2.88169	1868	191	930	162	787.75	70.4827	40.0985	4.67458	7.22993	4.20245	5.20437e-11	1.25628e-09
Mapoly0018s0015	33	10	16	14	18.25	2.28501	170	102	175	144	147.75	14.7977	18.8717	3.01028	5.68269	2.81868	5.94275e-11	1.41649e-09
Mapoly3267s0001	673	636	705	519	633.25	55.4588	2144	2040	2237	1326	1936.75	158.518	137.369	1.61264	10.1301	1.34665	6.511e-11	1.53894e-09	[PTHR24031:SF68] SUBFAMILY NOT NAMED; [PF00271] Helicase conserved C-terminal domain; [PTHR24031] FAMILY NOT NAMED
Mapoly0005s0117	239	129	94	123	146.25	7.11906	1241	292	2065	670	1067	30.2368	57.9739	2.8662	8.56805	2.57158	1.82885e-10	4.09201e-09
Mapoly2834s0002	150	199	156	149	163.5	14.9564	674	630	691	438	608.25	51.098	45.3374	1.89473	8.32308	1.62469	5.80434e-09	1.04919e-07
Mapoly0114s0054	65	35	52	48	50	4.18921	476	138	356	216	296.5	20.4802	21.2915	2.56564	6.90579	2.25534	7.64184e-09	1.35343e-07	[PTHR31262] FAMILY NOT NAMED; [4.1.1.39] Ribulose-bisphosphate carboxylase.; [PF00101] Ribulose bisphosphate carboxylase, small chain; [K01602] ribulose-bisphosphate carboxylase small chain [EC:4.1.1.39]
Mapoly0049s0120	189	105	81	98	118.25	5.44347	881	477	922	215	623.75	27.0474	22.2904	2.39814	8.03386	2.10838	7.91091e-09	1.39851e-07	[PTHR24322] FAMILY NOT NAMED; [PF13561] Enoyl-(Acyl carrier protein) reductase; [KOG0725] Reductases with broad range of substrate specificities
Mapoly0114s0056	104	72	68	64	77	6.25487	374	403	367	217	340.25	28.0562	21.2315	2.14222	7.34441	1.91436	8.21782e-09	1.45011e-07	[PTHR31262] FAMILY NOT NAMED; [4.1.1.39] Ribulose-bisphosphate carboxylase.; [PF00101] Ribulose bisphosphate carboxylase, small chain; [K01602] ribulose-bisphosphate carboxylase small chain [EC:4.1.1.39]
Mapoly0065s0035	1577	1594	1010	1405	1396.5	18.7289	5524	3302	5180	2282	4072	49.579	43.2139	1.54385	11.207	1.24637	8.62618e-09	1.51662e-07	[GO:0005524] ATP binding; [GO:0016021] integral to membrane; [PTHR24223] FAMILY NOT NAMED; [PF00664] ABC transporter transmembrane region; [GO:0016887] ATPase activity; [GO:0006810] transport; [GO:0055085] transmembrane transport; [KOG0054] Multidrug resistance-associated protein/mitoxantrone resistance protein, ABC superfamily; [GO:0042626] ATPase activity, coupled to transmembrane movement of s…
Mapoly0012s0111	1129	562	411	505	651.75	14.922	2317	2192	2282	1194	1996.25	46.6688	36.2315	1.61475	10.1337	1.41132	8.92729e-09	1.56528e-07
Mapoly0035s0046	864	255	347	345	452.75	14.7185	1639	1610	2085	945	1569.75	48.1807	44.579	1.79352	9.69071	1.59374	1.4027e-08	2.38151e-07	[GO:0003677] DNA binding; [PF02365] No apical meristem (NAM) protein; [PTHR31744] FAMILY NOT NAMED; [GO:0006355] regulation of transcription, DNA-dependent
Mapoly0112s0046	1051	1336	1419	1702	1377	37.14	21161	5014	10331	2237	9685.75	268.821	135.054	2.81425	11.7989	2.38024	1.67162e-08	2.81401e-07
Mapoly0046s0046	469	212	236	193	277.5	20.6341	1904	1217	1302	371	1198.5	100.976	53.7368	2.11027	9.12729	1.84345	3.79442e-08	6.02825e-07
Mapoly0054s0010	398	116	122	146	195.5	8.6023	5477	893	1888	264	2130.5	114.25	40.266	3.44528	9.21856	3.10477	5.53493e-08	8.54017e-07	[GO:0008168] methyltransferase activity; [PF03492] SAM dependent carboxyl methyltransferase; [PTHR31009] S-ADENOSYL-L-METHIONINE:CARBOXYL METHYLTRANSFERASE FAMILY PROTEIN
Mapoly0121s0002	41	43	44	65	48.25	2.91628	214	405	271	203	273.25	16.7241	12.607	2.49916	6.89977	2.26625	5.96293e-08	9.13479e-07
Mapoly0092s0067	1218	1013	484	962	919.25	28.8149	3997	2246	2960	1682	2721.25	82.7092	65.0774	1.56564	10.608	1.29659	6.37031e-08	9.72027e-07	[GO:0016020] membrane; [PTHR31218] FAMILY NOT NAMED; [PF00892] EamA-like transporter family
Mapoly0003s0167	1132	829	828	886	918.75	29.8608	9356	1484	6286	1831	4739.25	135.822	110.64	2.36679	10.9694	1.9836	7.33909e-08	1.11281e-06	[GO:0006096] glycolysis; [PF00162] Phosphoglycerate kinase; [GO:0004618] phosphoglycerate kinase activity; [KOG1367] 3-phosphoglycerate kinase; [PTHR11406:SF0] PHOSPHOGLYCERATE KINASE; [PTHR11406] PHOSPHOGLYCERATE KINASE
Mapoly0041s0020	258	339	178	486	315.25	10.8379	12955	338	7856	1287	5609	164.625	124.257	4.15274	10.3083	3.67715	9.55739e-08	1.41577e-06	[GO:0055114] oxidation-reduction process; [PTHR11496] ALCOHOL DEHYDROGENASE; [GO:0016491] oxidoreductase activity; [1.1.1.1] Alcohol dehydrogenase.; [K13954] alcohol dehydrogenase [EC:1.1.1.1]; [GO:0046872] metal ion binding; [KOG3857] Alcohol dehydrogenase, class IV; [PF00465] Iron-containing alcohol dehydrogenase
Mapoly0183s0012	610	480	717	525	583	13.5109	2428	1646	1826	947	1711.75	39.3793	27.723	1.55374	9.96957	1.24796	9.72951e-08	1.43685e-06	[KOG4178] Soluble epoxide hydrolase; [PTHR10992] ALPHA/BETA HYDROLASE FOLD-CONTAINING PROTEIN; [PF12697] Alpha/beta hydrolase family
Mapoly0181s0013	2246	870	895	1002	1253.25	69.9487	3829	3746	4482	2242	3574.75	191.718	170.269	1.51209	11.0254	1.30924	1.23681e-07	1.81127e-06
Mapoly0803s0001	98	39	76	72	71.25	3.05738	440	142	687	372	410.25	9.66095	18.9293	2.52387	7.40425	2.23631	1.61791e-07	2.34269e-06	[PF04970] Lecithin retinol acyltransferase; [PTHR13943] HRAS-LIKE SUPPRESSOR - RELATED
Mapoly0037s0134	20190	12527	9408	9544	12917.2	818.339	53049	58646	35656	20309	41915	3206.17	1608.91	1.69816	14.4988	1.49267	1.70453e-07	2.45154e-06
Mapoly0046s0058	809	157	182	127	318.75	27.1439	1938	822	2948	1153	1715.25	105.206	163.932	2.42755	9.44237	2.24961	2.33549e-07	3.27121e-06
Mapoly0044s0049	325	153	219	175	218	11.7325	1067	597	1011	362	759.25	37.9111	31.902	1.79978	8.63713	1.5104	2.47411e-07	3.45283e-06
Mapoly0046s0059	890	221	256	182	387.25	24.9337	1875	941	2490	1093	1599.75	80.7793	107.398	2.04623	9.55134	1.85497	2.7299e-07	3.77431e-06
Mapoly0049s0095	4924	1488	857	2139	2352	99.6774	21541	8542	19475	3356	13228.5	550.376	417.616	2.49164	12.3553	2.22027	3.96527e-07	5.30361e-06	[KOG0143] Iron/ascorbate family oxidoreductases; [GO:0055114] oxidation-reduction process; [PF14226] non-haem dioxygenase in morphine synthesis N-terminal; [GO:0016706] oxidoreductase activity, acting on paired donors, with incorporation or reduction of molecular oxygen, 2-oxoglutarate as one donor, and incorporation of one atom each of oxygen into both donors; [PTHR10209] OXIDOREDUCTASE, 2OG-FE(…
Mapoly0035s0005	202	123	100	173	149.5	1.38845	779	390	653	326	537	4.525	4.00241	1.84408	8.12494	1.55711	4.12698e-07	5.50844e-06	[K10380] ankyrin; [GO:0005515] protein binding; [PF00023] Ankyrin repeat; [KOG4412] 26S proteasome regulatory complex, subunit PSMD10; [PTHR24133] FAMILY NOT NAMED; [PF13962] Domain of unknown function; [PF12796] Ankyrin repeats (3 copies)
Mapoly0066s0097	3642	953	1267	921	1695.75	38.4465	4550	13389	6370	6017	7581.5	204.573	137.984	2.16049	11.8178	2.09096	4.23873e-07	5.64198e-06	[GO:0016020] membrane; [GO:0005452] inorganic anion exchanger activity; [GO:0016021] integral to membrane; [GO:0006820] anion transport; [PF00955] HCO3- transporter family; [PTHR11453] ANION EXCHANGE PROTEIN
Mapoly0125s0001	131	103	65	125	106	3.87728	536	558	561	190	461.25	17.4375	11.8884	2.12044	7.78483	1.85478	4.37433e-07	5.80236e-06	[PTHR31867] FAMILY NOT NAMED; [PF03330] Rare lipoprotein A (RlpA)-like double-psi beta-barrel; [PF01357] Pollen allergen
Mapoly0117s0024	541	84	445	176	311.5	18.5883	15736	1272	4300	435	5435.75	390.555	114.764	4.12474	10.238	3.70145	6.02807e-07	7.76124e-06	[KOG3017] Defense-related protein containing SCP domain; [PF00188] Cysteine-rich secretory protein family; [PTHR10334] CYSTEINE-RICH SECRETORY PROTEIN-RELATED
Mapoly0038s0088	377	245	484	171	319.25	9.69783	1457	592	1757	979	1196.25	25.1488	36.3605	1.90543	9.26699	1.60092	6.51416e-07	8.35363e-06	[PF04674] Phosphate-induced protein 1 conserved region; [PTHR31279] FAMILY NOT NAMED
Mapoly0012s0055	48	54	31	40	43.25	1.96354	243	126	214	137	180	6.94608	7.10889	2.05469	6.45792	1.77681	9.91242e-07	1.23138e-05
Mapoly0072s0041	298	175	234	109	204	14.8061	2274	596	1067	288	1056.25	83.7001	41.6735	2.37174	8.79462	2.0183	1.01273e-06	1.25611e-05	[PF03018] Dirigent-like protein; [PTHR21495] NUCLEOPORIN-RELATED
Mapoly0002s0040	82	61	70	53	66.5	1.58253	664	356	427	83	382.5	10.0976	4.96582	2.52224	7.2835	2.18719	1.08215e-06	1.33364e-05	[PF00514] Armadillo/beta-catenin-like repeat; [GO:0005515] protein binding; [PTHR23315] BETA CATENIN-RELATED ARMADILLO REPEAT-CONTAINING
Mapoly0045s0007	85	35	23	17	40	3.54795	161	4058	131	162	1128	201.814	13.1565	4.81415	7.784	4.85321	1.40451e-06	1.7037e-05	[GO:0046872] metal ion binding; [PF01439] Metallothionein
Mapoly0043s0070	1028	412	265	233	484.5	13.6392	2241	1744	1821	838	1661	51.4281	34.7477	1.77727	9.75527	1.59696	1.408e-06	1.70686e-05
Mapoly0037s0045	907	482	441	542	593	10.8513	3344	977	2803	875	1999.75	32.1399	28.9437	1.75354	10.032	1.43187	1.50775e-06	1.81297e-05
Mapoly0027s0099	353	130	114	97	173.5	13.1702	662	439	758	555	603.5	37.4546	47.6843	1.79783	8.30436	1.63037	1.52692e-06	1.83373e-05	[PTHR31495:SF0] SUBFAMILY NOT NAMED; [PF05042] Caleosin related protein; [PTHR31495] FAMILY NOT NAMED
Mapoly0037s0044	216	330	328	344	304.5	29.3128	5133	430	1675	827	2016.25	195.102	101.62	2.72676	9.57248	2.27674	2.02389e-06	2.38017e-05
Mapoly0033s0050	1218	530	728	546	755.5	28.562	3783	1271	3125	1205	2346	78.5197	71.6401	1.63457	10.3287	1.33399	2.13194e-06	2.4981e-05	[PTHR10357] ALPHA-AMYLASE; [PF00686] Starch binding domain; [GO:0003824] catalytic activity
Mapoly0004s0295	298.755	98.846	96.4567	81.1485	143.802	3.33192	659.73	1634.08	630.546	237.753	790.527	26.3987	9.12233	2.45792	8.39049	2.34963	2.42864e-06	2.81666e-05	[KOG4287] Pectin acetylesterase and similar proteins; [PTHR21562] NOTUM-RELATED; [PF03283] Pectinacetylesterase
Mapoly0110s0027	186	154	96	93	132.25	10.3101	958	371	566	222	529.25	42.8844	26.8469	1.99986	8.00068	1.69491	2.53486e-06	2.92754e-05	[PTHR24413] FAMILY NOT NAMED; [PF00651] BTB/POZ domain; [GO:0005515] protein binding
Mapoly0021s0019	668	231	192	242	333.25	6.81572	819	1850	1320	722	1177.75	26.8094	19.4109	1.82105	9.28474	1.69861	2.68278e-06	3.0781e-05
Mapoly0012s0110	174	108	156	100	134.5	4.28621	469	521	488	294	443	13.9485	11.0838	1.71895	7.94475	1.48145	3.09357e-06	3.5201e-05
Mapoly0093s0001	102	147	50	169	117	2.12456	1418	223	851	323	703.75	11.2875	8.95813	2.58753	8.12385	2.1921	3.21907e-06	3.63977e-05	[GO:0005506] iron ion binding; [KOG0156] Cytochrome P450 CYP2 subfamily; [GO:0055114] oxidation-reduction process; [GO:0016705] oxidoreductase activity, acting on paired donors, with incorporation or reduction of molecular oxygen; [K05280] flavonoid 3'-monooxygenase [EC:1.14.13.21]; [GO:0020037] heme binding; [1.14.13.21] Flavonoid 3'-monooxygenase.; [PTHR24298] FAMILY NOT NAMED; [PF00067] Cytoch…
Mapoly0087s0041	391	114	266	146	229.25	2.76923	3677	518	2330	251	1694	19.9336	12.7374	2.8849	9.18853	2.49881	4.04311e-06	4.51538e-05	[GO:0016020] membrane; [GO:0005524] ATP binding; [PF08370] Plant PDR ABC transporter associated; [GO:0016887] ATPase activity; [PTHR19241] ATP-BINDING CASSETTE TRANSPORTER; [PF01061] ABC-2 type transporter; [PF14510] ABC-transporter extracellular N-terminal; [KOG0065] Pleiotropic drug resistance proteins (PDR1-15), ABC superfamily; [PF00005] ABC transporter
Mapoly0070s0063	407	120	230	169	231.5	10.879	1523	700	1443	273	984.75	44.2483	33.9457	2.08827	8.83752	1.78375	4.31279e-06	4.78601e-05	[PF02797] Chalcone and stilbene synthases, C-terminal domain; [GO:0009058] biosynthetic process; [PF00195] Chalcone and stilbene synthases, N-terminal domain; [GO:0016746] transferase activity, transferring acyl groups; [PTHR11877] HYDROXYMETHYLGLUTARYL-COA SYNTHASE
Mapoly0007s0086	152	146	103	69	117.5	4.91668	1314	141	981	303	684.75	23.4156	22.9117	2.5419	8.08037	2.17417	4.56764e-06	5.04849e-05	[PF00571] CBS domain; [KOG1764] 5'-AMP-activated protein kinase, gamma subunit; [PTHR13780] AMP-ACTIVATED PROTEIN KINASE, GAMMA REGULATORY SUBUNIT; [GO:0030554] adenyl nucleotide binding
Mapoly0088s0041	50	23	24	25	30.5	1.16208	161	2292	79	61	648.25	48.0051	2.48701	4.40517	7.21204	4.37347	5.24126e-06	5.75673e-05	[GO:0016020] membrane; [GO:0030001] metal ion transport; [PTHR11040] ZINC/IRON TRANSPORTER; [PF02535] ZIP Zinc transporter; [KOG1558] Fe2+/Zn2+ regulated transporter; [GO:0055085] transmembrane transport; [GO:0046873] metal ion transmembrane transporter activity
Mapoly0086s0061	303	190	132	158	195.75	5.28245	1017	452	737	313	629.75	16.6752	12.5366	1.68526	8.41214	1.40514	5.44782e-06	5.97001e-05
Mapoly0006s0134	1519	752	843	714	957	19.2641	5010	1568	3521	1378	2869.25	54.2465	43.2723	1.58398	10.641	1.27761	5.58256e-06	6.10033e-05	[PTHR21576:SF1] UNCHARACTERIZED NODULIN-LIKE PROTEIN; [PTHR21576] UNCHARACTERIZED NODULIN-LIKE PROTEIN; [PF06813] Nodulin-like
Mapoly0040s0023	1018	572	411	825	706.5	16.3932	2888	2164	2126	899	2019.25	50.7929	30.6832	1.51493	10.2028	1.2513	5.61082e-06	6.12081e-05	[PTHR24106] FAMILY NOT NAMED
Mapoly0012s0076	113	81	175	139	127	4.77502	373	531	468	560	483	14.5658	17.7143	1.92636	8.02009	1.70087	6.04799e-06	6.5717e-05	[PF01370] NAD dependent epimerase/dehydratase family; [GO:0003824] catalytic activity; [GO:0050662] coenzyme binding; [KOG1502] Flavonol reductase/cinnamoyl-CoA reductase; [PTHR10366] NAD DEPENDENT EPIMERASE/DEHYDRATASE
Mapoly0009s0180	129	69	84	90	93	4.38701	2563	159	878	116	929	48.4252	18.9742	3.31898	8.10194	2.87999	6.30129e-06	6.80476e-05	[PF02797] Chalcone and stilbene synthases, C-terminal domain; [GO:0009058] biosynthetic process; [PF00195] Chalcone and stilbene synthases, N-terminal domain; [GO:0016746] transferase activity, transferring acyl groups; [PTHR11877] HYDROXYMETHYLGLUTARYL-COA SYNTHASE
Mapoly0140s0011	175	164	83	121	135.75	7.56482	518	314	455	383	417.5	19.7082	21.6114	1.62011	7.89458	1.38668	6.69568e-06	7.18688e-05	[KOG3080] Nucleolar protein-like/EBNA1-binding protein; [PTHR13028] RRNA PROCESSING PROTEIN EBNA1-BINDING PROTEIN-RELATED; [PF05890] Eukaryotic rRNA processing protein EBP2; [PTHR13028:SF0] SUBFAMILY NOT NAMED
Mapoly0172s0014	390	218	148	212	242	6.99422	754	914	724	412	701	22.0549	14.9311	1.53402	8.68031	1.33971	7.07298e-06	7.55771e-05	[PF00569] Zinc finger, ZZ type; [GO:0008270] zinc ion binding
Mapoly0189s0020	266	103	137	96	150.5	4.61637	820	287	908	301	579	14.1723	16.252	1.94309	8.14689	1.65892	7.72261e-06	8.20639e-05
Mapoly0015s0034	414	190	255	307	291.5	40.4086	1808	484	2373	404	1267.25	126.89	157.664	2.11975	9.18734	1.75617	7.81403e-06	8.29896e-05
Mapoly0003s0095	598	366	232	410	401.5	17.952	3497	344	2770	1013	1906	66.3652	73.6221	2.24679	9.70463	1.90239	7.94413e-06	8.42322e-05	[GO:0006950] response to stress; [PF00582] Universal stress protein family; [PTHR31964] FAMILY NOT NAMED
Mapoly0076s0059	5692	4470	3546	3897	4401.25	311.516	50459	9943	17761	4773	20734	1677.44	670.219	2.23599	13.1528	1.85131	8.85435e-06	9.31155e-05
Mapoly0062s0086	1629	329	429	341	682	7.97027	4597	2867	3941	747	3038	39.7341	24.2195	2.15511	10.4043	1.94292	1.0701e-05	0.000110843	[GO:0005524] ATP binding; [KOG0055] Multidrug/pheromone exporter, ABC superfamily; [GO:0016021] integral to membrane; [PF00664] ABC transporter transmembrane region; [GO:0016887] ATPase activity; [GO:0006810] transport; [GO:0055085] transmembrane transport; [GO:0042626] ATPase activity, coupled to transmembrane movement of substances; [PTHR24221] FAMILY NOT NAMED; [PF00005] ABC transporter
Mapoly0042s0006	70	33	35	39	44.25	1.29417	287	186	261	63	199.25	5.97493	4.01533	2.1683	6.51189	1.88647	1.25737e-05	0.000128765	[KOG0626] Beta-glucosidase, lactase phlorizinhydrolase, and related proteins; [GO:0004553] hydrolase activity, hydrolyzing O-glycosyl compounds; [GO:0005975] carbohydrate metabolic process; [PTHR10353] GLYCOSYL HYDROLASE; [PF00232] Glycosyl hydrolase family 1
Mapoly0049s0096	605	264	228	224	330.25	17.655	2142	593	1405	471	1152.75	60.5969	44.3483	1.80314	9.19382	1.50999	1.29117e-05	0.00013197	[PF04535] Domain of unknown function (DUF588); [PTHR11615] NITRATE, FROMATE, IRON DEHYDROGENASE
Mapoly0064s0029	9131	1922	1454	2459	3741.5	143.245	42141	12575	25621	3943	21070	908.805	497.381	2.49347	12.9978	2.23602	1.3247e-05	0.00013504	[GO:0055114] oxidation-reduction process; [PF00141] Peroxidase; [GO:0020037] heme binding; [PTHR31235] FAMILY NOT NAMED; [GO:0006979] response to oxidative stress; [GO:0004601] peroxidase activity
Mapoly0004s0182	300	281	116	163	215	7.07976	1231	451	1201	299	795.5	22.903	20.9681	1.88704	8.63475	1.57029	1.38894e-05	0.000141246	[GO:0005506] iron ion binding; [KOG0156] Cytochrome P450 CYP2 subfamily; [GO:0055114] oxidation-reduction process; [GO:0016705] oxidoreductase activity, acting on paired donors, with incorporation or reduction of molecular oxygen; [GO:0020037] heme binding; [PTHR24298] FAMILY NOT NAMED; [PF00067] Cytochrome P450
Mapoly0122s0057	7551	4198	2558	4105	4603	92.4098	35901	6178	29915	6406	19600	337.312	309.514	2.09018	13.1297	1.74737	1.55327e-05	0.000155787	[2.4.1.13] Sucrose synthase.; [GO:0009058] biosynthetic process; [PF00534] Glycosyl transferases group 1; [GO:0016157] sucrose synthase activity; [KOG0853] Glycosyltransferase; [K00695] sucrose synthase [EC:2.4.1.13]; [PF00862] Sucrose synthase; [GO:0005985] sucrose metabolic process; [PTHR12526] GLYCOSYLTRANSFERASE; [PTHR12526:SF27] SUCROSE SYNTHASE
Mapoly0087s0016	786	305	142	214	361.75	33.2914	1622	657	1879	805	1240.75	91.7235	114.478	1.77787	9.31389	1.57056	1.72779e-05	0.000171155	[PF02987] Late embryogenesis abundant protein; [PTHR23241] LATE EMBRYOGENESIS ABUNDANT (PLANTS) LEA-RELATED
Mapoly0048s0003	48	29	114	122	78.25	2.18118	2104	80	1250	224	914.5	21.3331	15.8027	3.54514	8.02155	3.02857	1.80663e-05	0.000178324	[GO:0055114] oxidation-reduction process; [K00430] peroxidase [EC:1.11.1.7]; [PF00141] Peroxidase; [GO:0020037] heme binding; [1.11.1.7] Peroxidase.; [GO:0006979] response to oxidative stress; [GO:0004601] peroxidase activity; [PTHR31388] FAMILY NOT NAMED
Mapoly0016s0119	838	323	253	167	395.25	11.9366	1315	1780	1099	771	1241.25	44.7696	27.145	1.65071	9.4285	1.52691	1.94578e-05	0.000191081
Mapoly0022s0032	1392	578	521	525	754	11.2871	3031	1672	2966	869	2134.5	30.649	25.1532	1.50114	10.2514	1.24408	2.01801e-05	0.00019727	[PF00249] Myb-like DNA-binding domain; [GO:0003682] chromatin binding; [PTHR31496] FAMILY NOT NAMED
Mapoly0023s0166	10962	2470	5054	2220	5176.5	754.438	16604	17613	22838	9801	16714	2320.67	2172.89	1.69099	13.1459	1.51134	2.50976e-05	0.000242029
Mapoly0016s0059	533	97	103	116	212.25	7.13868	970	696	1436	374	869	26.0622	27.6822	2.03308	8.66075	1.8524	2.54447e-05	0.000245131	[PTHR16007] EPIDIDYMAL MEMBRANE PROTEIN E9-RELATED; [PF04819] Family of unknown function (DUF716)
Mapoly0089s0042	2104	814	1084	670	1168	33.2742	8569	2778	3683	1401	4107.75	134.611	64.3097	1.81422	11.0279	1.51657	2.81436e-05	0.00026845	[K10529] alpha-dioxygenase [EC:1.-.-.-]; [PTHR11903] PROSTAGLANDIN G/H SYNTHASE; [KOG2408] Peroxidase/oxygenase; [PF03098] Animal haem peroxidase; [1.-.-.-] Oxidoreductases.
Mapoly0085s0100	210	214	177	201	200.5	6.22922	1196	237	1267	387	771.75	17.1786	21.414	1.944	8.58073	1.57014	3.03643e-05	0.000287782	[1.1.99.2] 2-hydroxyglutarate dehydrogenase.; [GO:0055114] oxidation-reduction process; [PF01266] FAD dependent oxidoreductase; [GO:0016491] oxidoreductase activity; [PTHR13847] FAD NAD BINDING OXIDOREDUCTASES; [K00109] 2-hydroxyglutarate dehydrogenase [EC:1.1.99.2]; [KOG2665] Predicted FAD-dependent oxidoreductase
Mapoly0011s0108	47	45	38	35	41.25	1.6215	110	789	152	102	288.25	17.3362	4.46409	2.80186	6.84532	2.68174	3.33718e-05	0.000313666
Mapoly0120s0024	382	70	63	86	150.25	10.8046	1355	713	585	229	720.5	67.6623	27.4784	2.26087	8.27013	2.0768	3.68177e-05	0.000342549	[PF14368] Probable lipid transfer
Mapoly0038s0029	3690	1655	1591	1623	2139.75	30.7468	10638	2919	8456	3060	6268.25	79.9724	72.932	1.55058	11.774	1.25285	3.8227e-05	0.000353783	[GO:0016310] phosphorylation; [GO:0005524] ATP binding; [PTHR22931:SF1] ALPHA-GLUCAN WATER DIKINASE, CHLOROPLAST PRECURSOR; [PF01326] Pyruvate phosphate dikinase, PEP/pyruvate binding domain; [GO:0016301] kinase activity; [PTHR22931] PHOSPHOENOLPYRUVATE DIKINASE-RELATED; [K08244] alpha-glucan, water dikinase [EC:2.7.9.4]; [2.7.9.4] Alpha-glucan, water dikinase.
Mapoly0142s0026	353	193	147	163	214	7.33218	898	625	820	248	647.75	22.8758	15.8805	1.59738	8.49939	1.33986	3.92562e-05	0.000362613	[PF04303] PrpF protein; [PTHR30349] PHAGE INTEGRASE-RELATED
Mapoly0140s0021	64	53	69	77	65.75	2.81692	411	136	258	171	244	9.21214	8.05512	1.89022	6.98042	1.55291	3.99632e-05	0.000368437
Mapoly0004s0175	2810	881	1318	881	1472.5	34.8442	13489	3804	6645	1281	6304.75	169.882	80.1142	2.0981	11.4855	1.78065	4.36531e-05	0.000397959	[GO:0055114] oxidation-reduction process; [KOG0069] Glyoxylate/hydroxypyruvate reductase (D-isomer-specific 2-hydroxy acid dehydrogenase superfamily); [PTHR10996:SF16] FORMATE DEHYDROGENASE; [PTHR10996] 2-HYDROXYACID DEHYDROGENASE-RELATED; [GO:0016616] oxidoreductase activity, acting on the CH-OH group of donors, NAD or NADP as acceptor; [GO:0008152] metabolic process; [GO:0051287] NAD binding; […
Mapoly0012s0074	454	180	241	276	287.75	9.23828	1263	729	1769	274	1008.75	27.2768	27.0421	1.80932	9.02192	1.49517	4.49191e-05	0.000408465	[GO:0005524] ATP binding; [K01610] phosphoenolpyruvate carboxykinase (ATP) [EC:4.1.1.49]; [PTHR30031:SF0] PHOSPHOENOLPYRUVATE CARBOXYKINASE [ATP]; [GO:0004612] phosphoenolpyruvate carboxykinase (ATP) activity; [PTHR30031] PHOSPHOENOLPYRUVATE CARBOXYKINASE [ATP]; [PF01293] Phosphoenolpyruvate carboxykinase; [GO:0006094] gluconeogenesis; [4.1.1.49] Phosphoenolpyruvate carboxykinase (ATP).
Mapoly0081s0021	175	239	120	106	160	3.52446	580	593	629	241	510.75	11.3697	8.22992	1.67393	8.15691	1.41165	4.608e-05	0.000418429	[GO:0005524] ATP binding; [KOG1187] Serine/threonine protein kinase; [PF07645] Calcium-binding EGF domain; [PF00069] Protein kinase domain; [GO:0004672] protein kinase activity; [PF13947] Wall-associated receptor kinase galacturonan-binding; [GO:0030247] polysaccharide binding; [GO:0006468] protein phosphorylation; [GO:0005509] calcium ion binding; [PTHR24420] LEUCINE-RICH REPEAT RECEPTOR-LIKE PR…
Mapoly0202s0006	925	652	531	613	680.25	47.536	3628	1111	3193	684	2154	133.764	112.676	1.66274	10.1844	1.31294	4.62088e-05	0.000419007	[GO:0016020] membrane; [PF03254] Xyloglucan fucosyltransferase; [GO:0042546] cell wall biogenesis; [GO:0008107] galactoside 2-alpha-L-fucosyltransferase activity; [PTHR31889] FAMILY NOT NAMED
Mapoly0004s0029	263	122	164	116	166.25	2.49252	1063	366	735	214	594.5	8.81663	6.0989	1.8377	8.23939	1.51866	4.62467e-05	0.000419155	[GO:0016567] protein ubiquitination; [GO:0004842] ubiquitin-protein ligase activity; [PTHR23315] BETA CATENIN-RELATED ARMADILLO REPEAT-CONTAINING; [PF04564] U-box domain
Mapoly0048s0037	105	60	46	58	67.25	15.3307	335	167	288	117	226.75	48.5155	40.6701	1.75199	6.90857	1.47856	5.7683e-05	0.000512688
Mapoly0172s0019	72	64	43	36	53.75	3.72612	259	536	117	114	256.5	25.8786	7.53011	2.2525	6.91015	2.09798	6.38402e-05	0.00056326
Mapoly0132s0049	10701	4627	4182	5319	6207.25	98.6493	30417	10247	24002	7076	17935.5	268.666	214.378	1.53078	13.3	1.23076	7.74268e-05	0.000667559	[GO:0009058] biosynthetic process; [4.3.1.24] Phenylalanine ammonia-lyase.; [PTHR10362] HISTIDINE AMMONIA-LYASE; [GO:0016841] ammonia-lyase activity; [PF00221] Aromatic amino acid lyase; [KOG0222] Phenylalanine and histidine ammonia-lyase; [K10775] phenylalanine ammonia-lyase [EC:4.3.1.24]
Mapoly0037s0115	1269	419	430	372	622.5	55.5817	4584	1292	2169	706	2187.75	220.503	114.741	1.81314	10.1	1.53063	7.89351e-05	0.000679046	[GO:0005507] copper ion binding; [GO:0009055] electron carrier activity; [PF02298] Plastocyanin-like domain
Mapoly0191s0006	494	140	305	172	277.75	11.2821	1153	866	985	362	841.5	36.0942	24.0772	1.59883	8.88382	1.3528	8.45541e-05	0.000723512	[KOG0143] Iron/ascorbate family oxidoreductases; [GO:0055114] oxidation-reduction process; [PF14226] non-haem dioxygenase in morphine synthesis N-terminal; [GO:0016706] oxidoreductase activity, acting on paired donors, with incorporation or reduction of molecular oxygen, 2-oxoglutarate as one donor, and incorporation of one atom each of oxygen into both donors; [PTHR10209] OXIDOREDUCTASE, 2OG-FE(…
Mapoly0005s0293	2610	696	521	649	1119	25.6915	5341	1634	6033	2147	3788.75	69.0539	86.035	1.75942	10.9169	1.53858	8.75262e-05	0.000746955
Mapoly0032s0159	14	18	44	17	23.25	1.1509	507	68	168	41	196	10.3654	4.07992	3.0701	6.04069	2.58433	8.83435e-05	0.000753597	[GO:0055114] oxidation-reduction process; [GO:0008270] zinc ion binding; [PF08240] Alcohol dehydrogenase GroES-like domain; [GO:0016491] oxidoreductase activity; [KOG0023] Alcohol dehydrogenase, class V; [PF00107] Zinc-binding dehydrogenase; [PTHR11695] ALCOHOL DEHYDROGENASE RELATED; [PTHR11695:SF261] ALCOHOL DEHYDROGENASE (ZN CONTAINING) (ADH-6)
Mapoly0075s0028	927	596	534	380	609.25	48.868	2876	1316	2317	536	1761.25	141.436	96.7997	1.53134	9.96305	1.22281	9.5445e-05	0.000807744	[KOG0710] Molecular chaperone (small heat-shock protein Hsp26/Hsp42); [PTHR11527] SMALL HEAT-SHOCK PROTEIN (HSP20) FAMILY; [PF00011] Hsp20/alpha crystallin family
Mapoly0028s0085	925	64	92	115	299	5.08688	7885	1264	2372	219	2935	68.3807	19.8981	3.29471	9.69631	3.05751	9.70146e-05	0.000819589	[GO:0055114] oxidation-reduction process; [GO:0005515] protein binding; [GO:0016702] oxidoreductase activity, acting on single donors with incorporation of molecular oxygen, incorporation of two atoms of oxygen; [PTHR11771] LIPOXYGENASE; [PF01477] PLAT/LH2 domain; [GO:0046872] metal ion binding; [PF00305] Lipoxygenase
Mapoly0066s0077	379	80	64	95	154.5	2.82985	1416	596	730	163	726.25	16.3901	7.34538	2.23212	8.28412	2.00734	9.7106e-05	0.000820002	[PF13855] Leucine rich repeat; [PF08263] Leucine rich repeat N-terminal domain; [GO:0005515] protein binding; [PF00560] Leucine Rich Repeat; [PF12799] Leucine Rich repeats (2 copies); [PTHR24420] LEUCINE-RICH REPEAT RECEPTOR-LIKE PROTEIN KINASE; [KOG0472] Leucine-rich repeat protein
Mapoly0202s0005	592	505	413	446	489	14.9963	2287	601	2114	632	1408.5	35.1036	35.4366	1.52606	9.6518	1.1724	9.79031e-05	0.000825287	[PTHR22957] TBC1 DOMAIN FAMILY MEMBER GTPASE-ACTIVATING PROTEIN
Mapoly0159s0004	235	229	227	335	256.5	6.08237	448	1027	668	820	740.75	15.917	16.2956	1.52966	8.84033	1.34074	0.000103076	0.000861366
Mapoly0825s0001	44	27	39	48	39.5	1.77559	125	93	224	129	142.75	4.15698	6.88598	1.85093	6.24549	1.57573	0.000109603	0.000910639
Mapoly3320s0001	80	78	46	56	65	4.23786	438	53	638	191	330	12.2971	22.8757	2.34217	7.14245	1.993	0.000123252	0.00101285	[PF00264] Common central domain of tyrosinase; [PF12142] Polyphenol oxidase middle domain; [GO:0055114] oxidation-reduction process; [PTHR11474] TYROSINASE; [GO:0016491] oxidoreductase activity; [GO:0008152] metabolic process; [GO:0004097] catechol oxidase activity; [PF12143] Protein of unknown function (DUF_B2219)
Mapoly0066s0017	233	91	98	101	130.75	3.1337	191	914	396	442	485.75	13.3312	9.76629	1.8926	8.01924	1.81581	0.000126158	0.00103453	[PF03055] Retinal pigment epithelial membrane protein; [PTHR10543] BETA-CAROTENE DIOXYGENASE; [KOG1285] Beta, beta-carotene 15,15'-dioxygenase and related enzymes
Mapoly0013s0092	658	308	316	338	405	8.00769	1666	1402	1322	327	1179.25	26.8639	13.8866	1.54164	9.39993	1.28452	0.000130802	0.00106852
Mapoly0045s0017	341	193	272	117	230.75	8.75607	1973	384	893	312	890.5	35.3803	19.7424	1.94782	8.75766	1.59068	0.000131205	0.00107123	[PTHR10891] EF-HAND CALCIUM-BINDING DOMAIN CONTAINING PROTEIN; [PF13499] EF-hand domain pair; [GO:0005509] calcium ion binding; [KOG0027] Calmodulin and related proteins (EF-Hand superfamily)
Mapoly0011s0109	465	367	388	303	380.75	17.6944	965	3175	859	510	1377.25	91.5967	28.224	1.8546	9.5533	1.69285	0.000136458	0.00110769	[GO:0005375] copper ion transmembrane transporter activity; [PTHR12483] SOLUTE CARRIER FAMILY 31 (COPPER TRANSPORTERS); [GO:0035434] copper ion transmembrane transport; [GO:0016021] integral to membrane; [PF04145] Ctr copper transporter family; [KOG3386] Copper transporter
Mapoly0040s0116	175.677	92.3548	46.9494	116.744	107.931	2.4858	903.159	141.926	755.21	178.339	494.659	9.54964	9.15213	2.19528	7.77049	1.85301	0.000150285	0.00121126	[GO:0006355] regulation of transcription, DNA-dependent; [GO:0043565] sequence-specific DNA binding; [GO:0003700] sequence-specific DNA binding transcription factor activity; [PTHR31282] FAMILY NOT NAMED; [PF03106] WRKY DNA -binding domain
Mapoly1289s0001	590	198	238	214	310	10.8178	1174	873	1427	290	941	31.7704	25.5335	1.60161	9.02084	1.35066	0.000156858	0.00126003	[PF12819] Carbohydrate-binding protein of the ER; [PTHR24420] LEUCINE-RICH REPEAT RECEPTOR-LIKE PROTEIN KINASE
Mapoly0045s0101	359	198	106	173	209	3.45787	1242	501	699	241	670.75	12.198	6.85836	1.6818	8.48545	1.40064	0.000168546	0.00134495	[KOG1396] Uncharacterized conserved protein; [PTHR12953] MEMBRANE PROTEIN CH1 RELATED; [PF07738] Sad1 / UNC-like C-terminal; [PTHR12953:SF1] MEMBRANE PROTEIN CH1 RELATED
Mapoly0114s0052	139	22	51	20	58	6.92738	501	129	315	153	274.5	32.1009	26.3038	2.24072	6.88851	2.01369	0.000176455	0.00140168	[PTHR31262] FAMILY NOT NAMED; [4.1.1.39] Ribulose-bisphosphate carboxylase.; [PF00101] Ribulose bisphosphate carboxylase, small chain; [K01602] ribulose-bisphosphate carboxylase small chain [EC:4.1.1.39]
Mapoly0021s0151	447	292	154	288	295.25	10.9463	1396	436	1133	415	845	27.8929	25.0683	1.5167	8.91022	1.21154	0.000178254	0.00141481
Mapoly0031s0060	1066	437	365	461	582.25	15.1345	2319	1517	2723	455	1753.5	44.0777	35.0559	1.59036	9.91884	1.32139	0.00017842	0.00141555	[GO:0005506] iron ion binding; [KOG0156] Cytochrome P450 CYP2 subfamily; [GO:0055114] oxidation-reduction process; [GO:0016705] oxidoreductase activity, acting on paired donors, with incorporation or reduction of molecular oxygen; [GO:0020037] heme binding; [PTHR24298] FAMILY NOT NAMED; [PF00067] Cytochrome P450
Mapoly0029s0102	2933	1190	695	806	1406	47.4865	1995	8088	4132	3500	4428.75	174.67	125.775	1.65523	11.2964	1.59758	0.000188926	0.0014891	[K01369] legumain [EC:3.4.22.34]; [KOG1348] Asparaginyl peptidases; [PF01650] Peptidase C13 family; [GO:0006508] proteolysis; [PTHR12000] HEMOGLOBINASE FAMILY MEMBER; [GO:0004197] cysteine-type endopeptidase activity; [3.4.22.34] Legumain.
Mapoly0027s0111	512	69	110	101	198	3.76485	1470	3407	559	98	1383.5	47.3586	5.56947	2.80413	9.00421	2.74855	0.000210213	0.00163615	[GO:0016021] integral to membrane; [GO:0055085] transmembrane transport; [PTHR31752] FAMILY NOT NAMED; [PF03547] Membrane transport protein
Mapoly0035s0012	67	60	46	92	66.25	2.70077	264	170	290	127	212.75	7.486	7.31744	1.68167	6.89136	1.37181	0.000217727	0.00168647	[GO:0005515] protein binding; [PF00023] Ankyrin repeat; [KOG4412] 26S proteasome regulatory complex, subunit PSMD10; [PTHR24158] FAMILY NOT NAMED; [PF13637] Ankyrin repeats (many copies); [PF12796] Ankyrin repeats (3 copies)
Mapoly0002s0292	186	64	65	65	95	2.4602	478	152.812	403	204.946	309.689	6.86431	7.23169	1.70377	7.36123	1.45956	0.000253962	0.00193016	[GO:0008762] UDP-N-acetylmuramate dehydrogenase activity; [GO:0050660] flavin adenine dinucleotide binding; [GO:0055114] oxidation-reduction process; [GO:0016491] oxidoreductase activity; [PF08031] Berberine and berberine like; [PTHR11748] D-LACTATE DEHYDROGENASE; [PF01565] FAD binding domain
Mapoly0099s0045	1396	1309	809	1253	1191.75	46.8121	9294	1252	5494	1413	4363.25	158.703	112.911	1.87223	11.0895	1.47566	0.00026146	0.00197463	[GO:0055114] oxidation-reduction process; [GO:0008270] zinc ion binding; [PF08240] Alcohol dehydrogenase GroES-like domain; [GO:0016491] oxidoreductase activity; [K00008] L-iditol 2-dehydrogenase [EC:1.1.1.14]; [PF00107] Zinc-binding dehydrogenase; [PTHR11695] ALCOHOL DEHYDROGENASE RELATED; [KOG0024] Sorbitol dehydrogenase; [1.1.1.14] L-iditol 2-dehydrogenase.
Mapoly0033s0100	343	73	70	98	146	19.3651	610	303	773	297	495.75	54.0517	65.5555	1.76295	7.99519	1.56686	0.000268216	0.00201703	[GO:0016021] integral to membrane; [PF01679] Proteolipid membrane potential modulator; [PTHR21659] HYDROPHOBIC PROTEIN RCI2 (LOW TEMPERATURE AND SALT RESPONSIVE PROTEIN LTI6)-RELATED; [KOG1773] Stress responsive protein
Mapoly0098s0042	99.8326	94.072	36.8856	111.764	85.6386	2.12914	532.973	231.379	451.936	104.818	330.276	7.78259	5.72401	1.9461	7.3543	1.6049	0.000275417	0.00206451	[PF00916] Sulfate transporter family; [GO:0015116] sulfate transmembrane transporter activity; [GO:0016021] integral to membrane; [GO:0008272] sulfate transport; [PTHR31970] FAMILY NOT NAMED; [PTHR31970:SF0] SUBFAMILY NOT NAMED
Mapoly0182s0016	104	24	74	24	56.5	1.92367	324	141	293	127	221.25	6.64629	6.14518	1.96746	6.75875	1.70288	0.000303811	0.00225283	[KOG1187] Serine/threonine protein kinase; [PF07714] Protein tyrosine kinase; [GO:0004672] protein kinase activity; [GO:0006468] protein phosphorylation; [PTHR24420] LEUCINE-RICH REPEAT RECEPTOR-LIKE PROTEIN KINASE
Mapoly0033s0162	735	400	377	497	502.25	20.8916	3357	688	2190	467	1675.5	66.6539	46.1339	1.73791	9.77	1.37176	0.000307617	0.0022758	[PTHR10774] EXTENDED SYNAPTOTAGMIN-RELATED; [PF00168] C2 domain; [GO:0005515] protein binding
Mapoly0073s0080	307	205	214	225	237.75	11.1643	1364	264	997	354	744.75	29.8504	27.0771	1.6469	8.66678	1.2887	0.000320909	0.00236055	[GO:0016020] membrane; [GO:0055114] oxidation-reduction process; [PF11909] NADH-quinone oxidoreductase cyanobacterial subunit N; [GO:0016655] oxidoreductase activity, acting on NAD(P)H, quinone or similar compound as acceptor
Mapoly0087s0065	1546	424	594	397	740.25	65.2242	4002	2139	2190	692	2255.75	238.233	113.398	1.60739	10.267	1.36774	0.000327176	0.00240024	[GO:0016021] integral to membrane; [PF06140] Interferon-induced 6-16 family
Mapoly0069s0092	4137	123	715	271	1311.5	52.6863	26968	8640	9543	920	11517.8	653.75	190.264	3.13447	11.7698	2.94061	0.000342465	0.0024991	[3.2.1.14] Chitinase.; [KOG4742] Predicted chitinase; [GO:0006032] chitin catabolic process; [GO:0008061] chitin binding; [GO:0004568] chitinase activity; [K01183] chitinase [EC:3.2.1.14]; [PTHR22595] CHITINASE-RELATED; [GO:0016998] cell wall macromolecule catabolic process; [PF00182] Chitinase class I; [PF00187] Chitin recognition protein
Mapoly0058s0056	18106	3457	4776	3141	7370	950.812	41199	14142	23310	13283	22983.5	3125.51	2268.71	1.64085	13.5807	1.44239	0.000350775	0.00255009
Mapoly0076s0057	243	454	349	399	361.25	44.573	5496	446	1646	345	1983.25	267.31	97.6983	2.45647	9.66393	1.971	0.000417091	0.00298163
Mapoly0074s0006	353	147	231	152	220.75	4.14342	3037	288	944	191	1115	24.1209	8.92395	2.33603	8.85637	1.933	0.000440675	0.00312819	[PTHR32227] FAMILY NOT NAMED; [GO:0004553] hydrolase activity, hydrolyzing O-glycosyl compounds; [GO:0005975] carbohydrate metabolic process; [PF07983] X8 domain; [PF00332] Glycosyl hydrolases family 17
Mapoly0027s0052	150	55	25	4	58.5	12.0625	942	1281	67	56	586.5	228.408	12.8761	3.3234	7.48013	3.25605	0.000444852	0.0031532	[PF14368] Probable lipid transfer
Mapoly0009s0174	75	14	43	50	45.5	2.03684	857	108	342	25	333	16.7779	6.57606	2.86885	6.84599	2.45844	0.000526572	0.00364144	[PF02797] Chalcone and stilbene synthases, C-terminal domain; [GO:0009058] biosynthetic process; [PF00195] Chalcone and stilbene synthases, N-terminal domain; [GO:0016746] transferase activity, transferring acyl groups; [PTHR11877] HYDROXYMETHYLGLUTARYL-COA SYNTHASE
Mapoly0034s0133	32	11	21	20	21	1.78029	89	56	109	40	73.5	5.24363	5.45393	1.80246	5.27076	1.52524	0.000551213	0.00377844
Mapoly0012s0122	44	44	35	56	44.75	2.21442	153	83	149	148	133.25	4.78439	6.71101	1.57204	6.29735	1.31357	0.000772607	0.00508923
Mapoly0021s0144	265	127	169	124	171.25	3.5243	857	256	619	238	492.5	9.3159	7.69566	1.52347	8.13064	1.20875	0.000778944	0.00512168	[KOG0157] Cytochrome P450 CYP4/CYP19/CYP26 subfamilies; [GO:0005506] iron ion binding; [GO:0055114] oxidation-reduction process; [GO:0016705] oxidoreductase activity, acting on paired donors, with incorporation or reduction of molecular oxygen; [PTHR24296] FAMILY NOT NAMED; [GO:0020037] heme binding; [PF00067] Cytochrome P450
Mapoly0160s0004	621	1169	463	1186	859.75	41.2911	7993	644	6063	1166	3966.5	152.224	138.336	2.20575	10.7958	1.75522	0.000781899	0.00513465	[GO:0000287] magnesium ion binding; [4.1.1.1] Pyruvate decarboxylase.; [PF02775] Thiamine pyrophosphate enzyme, C-terminal TPP binding domain; [PTHR18968] THIAMINE PYROPHOSPHATE ENZYMES; [GO:0030976] thiamine pyrophosphate binding; [K01568] pyruvate decarboxylase [EC:4.1.1.1]; [PF00205] Thiamine pyrophosphate enzyme, central domain; [GO:0003824] catalytic activity; [KOG1184] Thiamine pyrophosphat…
Mapoly0036s0100	133	78	38	73	80.5	2.96018	278	222	314	117	232.75	8.17012	6.99894	1.53055	7.06288	1.29598	0.000788677	0.00517037	[PTHR11516:SF25] PYRUVATE DEHYDROGENASE E1 COMPONENT ALPHA SUBUNIT, MITOCHONDRIAL; [PF00676] Dehydrogenase E1 component; [PTHR11516] PYRUVATE DEHYDROGENASE E1 COMPONENT, ALPHA SUBUNIT (BACTERIAL AND ORGANELLAR); [GO:0008152] metabolic process; [KOG0225] Pyruvate dehydrogenase E1, alpha subunit; [GO:0016624] oxidoreductase activity, acting on the aldehyde or oxo group of donors, disulfide as accep…
Mapoly0045s0137	62	20	35	32	37.25	1.76321	238	100	188	41	141.75	6.68777	4.56942	1.92519	6.12549	1.61282	0.00079321	0.00519478	[PTHR21461:SF3] gb def: Hypothetical protein M03F8.4; [PF01697] Glycosyltransferase family 92; [PTHR21461] UNCHARACTERIZED
Mapoly0008s0012	540	207	152	199	274.5	2.09385	1346	853	925	198	830.5	7.45282	3.71401	1.59682	8.83417	1.35311	0.000807958	0.00527525
Mapoly0040s0095	487	140	225	159	252.75	16.6355	1651	580	921	199	837.75	61.8613	31.701	1.72841	8.76674	1.42942	0.000815439	0.00532049	[GO:0009607] response to biotic stimulus; [PF00407] Pathogenesis-related protein Bet v I family; [GO:0006952] defense response
Mapoly0070s0099	74	33	30	14	37.75	2.05873	275	70	138	79	140.5	6.87569	4.68346	1.89323	6.11231	1.63668	0.000860588	0.00558296
Mapoly0208s0003	52	60	41	52	51.25	1.16967	270	167	207	51	173.75	4.15615	2.4195	1.75941	6.54141	1.42818	0.000950306	0.00608517	[PTHR32227] FAMILY NOT NAMED; [GO:0004553] hydrolase activity, hydrolyzing O-glycosyl compounds; [GO:0005975] carbohydrate metabolic process; [PF01453] D-mannose binding lectin; [PF00332] Glycosyl hydrolases family 17
Mapoly0020s0129	6	2	5	2	3.75	1.09056	17	15	17	17	16.5	4.10293	4.67332	2.10825	2.98847	1.9436	0.000957409	0.00612253
Mapoly0032s0037	102	109	40	150	100.25	4.55826	286	351	334	220	297.75	12.7521	11.1541	1.56955	7.45932	1.32908	0.000964967	0.00616473	[PF07722] Peptidase C26; [3.4.19.9] Gamma-glutamyl hydrolase.; [GO:0006541] glutamine metabolic process; [GO:0016787] hydrolase activity; [K01307] gamma-glutamyl hydrolase [EC:3.4.19.9]; [KOG1559] Gamma-glutamyl hydrolase; [GO:0003824] catalytic activity; [PTHR11315:SF0] SUBFAMILY NOT NAMED; [PTHR11315] PROTEASE FAMILY C26 GAMMA-GLUTAMYL HYDROLASE; [GO:0008242] omega peptidase activity
Mapoly0061s0041	84	18	28	17	36.75	1.19051	285	48	236	73	160.5	4.47502	4.52401	2.12374	6.16011	1.85761	0.000987797	0.00627111	[PTHR10357] ALPHA-AMYLASE; [GO:0004556] alpha-amylase activity; [K01176] alpha-amylase [EC:3.2.1.1]; [GO:0005975] carbohydrate metabolic process; [PF07821] Alpha-amylase C-terminal beta-sheet domain; [GO:0003824] catalytic activity; [GO:0043169] cation binding; [GO:0005509] calcium ion binding; [3.2.1.1] Alpha-amylase.; [PF00128] Alpha amylase, catalytic domain
Mapoly0155s0011	264	92	74	64	123.5	7.56667	169	773	327	363	408	29.8046	21.1538	1.72324	7.83044	1.68702	0.000997574	0.00631241	[PTHR31694] FAMILY NOT NAMED; [PF13668] Ferritin-like domain
Mapoly2449s0001	37	15	47	21	30	1.94181	234	72	167	40	128.25	7.83215	5.49004	2.09225	5.91535	1.71466	0.00103267	0.00649402	[GO:0055114] oxidation-reduction process; [KOG0025] Zn2+-binding dehydrogenase (nuclear receptor binding factor-1); [GO:0008270] zinc ion binding; [GO:0016491] oxidoreductase activity; [PF00107] Zinc-binding dehydrogenase; [PTHR11695] ALCOHOL DEHYDROGENASE RELATED
Mapoly0022s0185	110	10	41	36	49.25	1.06706	310	239	276	48	218.25	5.31348	2.98711	2.14552	6.63011	1.92098	0.00105007	0.00659534	[GO:0016020] membrane; [PTHR11654] OLIGOPEPTIDE TRANSPORTER-RELATED; [PF00854] POT family; [KOG1237] H+/oligopeptide symporter; [GO:0006810] transport; [GO:0005215] transporter activity
Mapoly0002s0234	332	160	175	180	211.75	3.19151	569	1627	564	158	729.5	15.9696	4.65144	1.78406	8.64203	1.62661	0.00107877	0.00674217	[GO:0005524] ATP binding; [KOG0055] Multidrug/pheromone exporter, ABC superfamily; [GO:0016021] integral to membrane; [PF00664] ABC transporter transmembrane region; [GO:0016887] ATPase activity; [GO:0006810] transport; [GO:0055085] transmembrane transport; [GO:0042626] ATPase activity, coupled to transmembrane movement of substances; [PTHR24221] FAMILY NOT NAMED; [PF00005] ABC transporter
Mapoly0164s0004	56	79	62	83	70	3.64104	140	236	209	217	200.5	8.68636	10.0559	1.51684	6.95107	1.29978	0.00111316	0.00691898
Mapoly0140s0020	15626	4934	5097	4944	7650.25	577.228	20765	43496	14882	8166	21827.2	2373.12	809.766	1.51254	13.6536	1.39853	0.00112327	0.00697502	[PF14368] Probable lipid transfer
Mapoly0089s0056	73	38	37	44	48	1.00789	372	56	315	61	201	3.5234	3.2915	2.0638	6.53954	1.69714	0.0011575	0.00716507	[3.6.3.6] Proton-exporting ATPase.; [K01535] H+-transporting ATPase [EC:3.6.3.6]; [GO:0000166] nucleotide binding; [PF00702] haloacid dehalogenase-like hydrolase; [KOG0205] Plasma membrane H+-transporting ATPase; [PTHR24093] FAMILY NOT NAMED; [PF00690] Cation transporter/ATPase, N-terminus; [GO:0046872] metal ion binding; [PF00122] E1-E2 ATPase
Mapoly0121s0040	435	1130	485	1015	766.25	64.739	9895	1048	3439	630	3753	339.099	135.455	2.29201	10.6712	1.81221	0.00118594	0.0073101	[PF03018] Dirigent-like protein; [PTHR21495] NUCLEOPORIN-RELATED
Mapoly0183s0001	93	100	32	84	77.25	3.8384	428	121	209	211	242.25	10.8484	9.57357	1.64762	7.07759	1.36952	0.00122911	0.00754245	[PTHR24322] FAMILY NOT NAMED; [KOG0725] Reductases with broad range of substrate specificities; [GO:0016491] oxidoreductase activity; [GO:0008152] metabolic process; [PF00106] short chain dehydrogenase
Mapoly0027s0053	187	283	74	200	186	35.2625	1248	432	446	268	598.5	128.12	60.0135	1.68551	8.35073	1.35292	0.00128726	0.0078394	[PF14368] Probable lipid transfer
Mapoly0055s0061	33	19	30	44	31.5	1.63396	207	78	143	41	117.25	5.86779	3.91741	1.89282	5.90055	1.5207	0.00130002	0.00789714
Mapoly0088s0029	886	200	228	161	368.75	51.7382	694	2198	935	598	1106.25	209.068	104.153	1.5847	9.3088	1.53363	0.00132264	0.00801941
Mapoly0203s0011	44	38	74	17	43.25	1.02716	110	117	236	137	150	2.32937	3.8517	1.79182	6.35937	1.52373	0.00134899	0.00816636	[PF13516] Leucine Rich repeat; [PTHR24106] FAMILY NOT NAMED
Mapoly0003s0099	3112	2012	657	1606	1846.75	169.451	13420	2230	7453	1805	6227	577.116	366.203	1.75349	11.6347	1.41663	0.00135895	0.00821633
Mapoly0022s0183	606	197	214	179	299	7.91318	1826	349	1420	297	973	23.6423	19.7142	1.70196	8.97537	1.39338	0.00136867	0.0082662	[GO:0016758] transferase activity, transferring hexosyl groups; [PF05637] galactosyl transferase GMA12/MNN10 family; [KOG4748] Subunit of Golgi mannosyltransferase complex; [GO:0016021] integral to membrane; [PTHR31311] FAMILY NOT NAMED
Mapoly0024s0041	28.653	5.19048	21.2154	10	16.2647	1.568	80.3591	65.9765	48.04	42.2116	59.1468	6.22689	4.09437	1.85615	4.94956	1.6537	0.00137728	0.00830374
Mapoly0022s0190	45	20	34	28	31.75	1.02764	291	96	120	27	133.5	5.06369	1.97646	2.06855	5.96956	1.71315	0.00143569	0.00859945	[KOG0157] Cytochrome P450 CYP4/CYP19/CYP26 subfamilies; [GO:0005506] iron ion binding; [PTHR24282] FAMILY NOT NAMED; [GO:0055114] oxidation-reduction process; [GO:0016705] oxidoreductase activity, acting on paired donors, with incorporation or reduction of molecular oxygen; [GO:0020037] heme binding; [PF00067] Cytochrome P450
Mapoly0049s0008	4064	1041	616	1018	1684.75	115.926	9531	6082	4795	1219	5406.75	493.163	187.21	1.68217	11.4739	1.49144	0.00150118	0.00895552
Mapoly0016s0007	883	396	361	207	461.75	15.5089	3900	969	1578	255	1675.5	67.8444	26.2412	1.85918	9.68143	1.53826	0.00150299	0.00896244	[GO:0055114] oxidation-reduction process; [PTHR31803] FAMILY NOT NAMED; [PF01786] Alternative oxidase; [GO:0009916] alternative oxidase activity
Mapoly0030s0115	211	219	229	135	198.5	11.5863	1062	143	1077	358	660	26.7112	35.1662	1.73282	8.45775	1.35478	0.00162093	0.00955756	[PF00241] Cofilin/tropomyosin-type actin-binding protein; [GO:0015629] actin cytoskeleton; [GO:0030042] actin filament depolymerization; [KOG1735] Actin depolymerizing factor; [GO:0005622] intracellular; [GO:0003779] actin binding; [PTHR11913] COFILIN-RELATED
Mapoly0011s0180	1836	509	419	661	856.25	9.61867	5341	1361	2602	841	2536.25	31.5624	17.4298	1.56648	10.4288	1.28984	0.00162339	0.00956627	[GO:0005524] ATP binding; [GO:0016021] integral to membrane; [PTHR24223] FAMILY NOT NAMED; [PF00664] ABC transporter transmembrane region; [GO:0016887] ATPase activity; [GO:0006810] transport; [GO:0055085] transmembrane transport; [KOG0054] Multidrug resistance-associated protein/mitoxantrone resistance protein, ABC superfamily; [GO:0042626] ATPase activity, coupled to transmembrane movement of s…
