# Supplementary material for: Deep evolutionary origin of gamete-directed zygote activation by KNOX/BELL transcription factors in green plants
Source: eLife. 2021 Sep 28;10:e57090. doi: 10.7554/eLife.57090 (PMC8478417; doi:10.7554/eLife.57090)
Supplement: Supplementary file 2. — Lowercase and uppercase letters indicate synthetic adaptor and target DNA sequences, respectively. [file elife-57090-supp2.xlsx]

## Sheet: Sheet1
Supplementary File 2. Primers used in this study
Primer name	Sequence (from 5' to 3')
For RT-PCR in Fig 2A and Fig5A
MpEF1a-qPCR-Fw	AAGCCGTCGAAAAGAAGGAG
MpEF1a-qPCR-Rv	TTCAGGATCGTCCGTTATCC
MpKNOX1-RT-Fw	TTCAGTGTCTCATCGTGCATCATCC
MpKNOX1-RT-Rv	TGGTCTTGTGCTGGGAGCTTG
MpBELL3-RT-Fw	GCACGTACAGGCACCATCAC
MpBELL3-RT-Rv	CGTATCGCAGTGAGTAGCAGCAC
MpBELL4-RT-Fw	TACCAGGGTTTGTCGTCCGCTATC
MpBELL4-RT-Rv	GTTGTACGCCGACCTCACTTTCA
For DNA construction
MpKNOX1ge01Fw	ctcgGAAGCTCTAAAAGATCTT
MpKNOX1ge01Rv	aaacAAGATCTTTTAGAGCTTC
MpBELL4-ge1-Fw	ctcgCGACTGGCGGACCTCCAT
MpBELL4-ge1-Rv	aaacATGGAGGTCCGCCAGTCG
MpBELL4-ge2-Fw	ctcgCCGATTCGCAGTCCGAGT
MpBELL4-ge2-Rv	aaacACTCGGACTGCGAATCGG
MpBELL3-ge3-Fw	ctcgCTTCATCGGTCAGAGCTT
MpBELL3-ge3-Rv	aaacAAGCTCTGACCGATGAAG
MpBELL3-ge4-Fw	ctcgAGTTGAAGAGATTGCAAC
MpBELL3-ge4-Rv	aaacGTTGCAATCTCTTCAACT
H-MpKNOX1pro-Fw	ccgcaagcttgcatgTGACACTGTGGAGCAACACC
SmaI-MpKNOX1pro-Rv	cccaccggagcccccgggTTTCCAGGAAACCGTGACAAATG
KNOXp-H2B-Fw	acggtttcctggaaaATGGCGAAGGCAGATAAGAA
GFP-H2B-Rv	cccaccggagcccccAGAACTCGTAAACTTCGTAA
G-MpKNOX1ter	ggaggcggaggtgccTGATCTCCAGCCCCTTTTCG
E-MpKNOX1ter-Rv	tcggtaccctcagccGTCGATGACTATCTCTCGTCCC
gMpKNOX1-Fw	ACGGTTTCCTGGAAAATGCT
gMpKNOX1-Rv	cccaccggagcccccTCGTCTTGGGCCATTCATCTTG
HBS-linker-Fw	AAGCTTGGATCCACTAGT
HBS-linker-Rv	ACTAGTGGATCCAAGCTTcatg
H-ECpro-Fw	gcgcgccgcggccgcCGACAACACACAGACTCCGT
G-SpeI-ECpro-Rv	cccactagtggatccCTGCAATTCTCGAATTCAGCTG
E-MpSUN-Fw	GAATTGCAGGGATCCATGTCAGCAGCTTCAGCTTC
G-MpSUN-Rv	cccaccggagcccccATCAGAACTAGGGGCTAAATTCG
